# Supplementary material for: Rheumatoid arthritis, systemic lupus erythematosus and primary Sjögren's syndrome shared megakaryocyte expansion in peripheral blood
Source: HighWire-hosted journal article supplement (doi:10.1136/annrheumdis-2021-220066), 2021-08-30
Supplement: annrheumdis-2021-220066supp010_data_supplement.xlsx [file annrheumdis-2021-220066supp010_data_supplement.xlsx]

## Sheet: RA DEGs
Gene name	Count_Control	Count_RA	Fold change	log2 (Fold change)	Pvalue	FDR	Type
CXCR2	3676.96	124.205	0.0337792	-4.45347	1.17133e-54	4.04435e-50	down
CXCR1	3265.76	65.437	0.0200373	-4.94846	2.78835e-50	4.81381e-46	down
CCR3	180.215	12.1379	0.0673522	-3.61263	1.54162e-44	1.7743e-40	down
TNFRSF10C	1323.75	47.9711	0.0362387	-4.27592	3.85269e-43	3.32564e-39	down
MS4A2	105.475	5.01553	0.0475518	-3.92337	9.13353e-38	6.30725e-34	down
CPA3	65.8098	3.27643	0.0497863	-3.83557	4.96509e-35	2.85724e-31	down
KRT23	240.364	5.88034	0.0244643	-4.48997	9.59439e-34	4.7325e-30	down
MME	581.95	18.9577	0.0325761	-4.23838	2.05934e-33	8.8881e-30	down
MANSC1	126.472	11.8546	0.0937332	-3.15265	7.04845e-33	2.7041e-29	down
CLC	618.086	15.2686	0.0247031	-4.45404	2.36061e-32	8.15071e-29	down
CACNG6	32.7379	1.11586	0.0340847	-4.09246	1.44862e-30	4.54708e-27	down
PI3	277.403	2.85947	0.010308	-4.91542	3.04831e-29	8.77101e-26	down
BTG2	11391.8	2960.63	0.259891	-1.87714	2.58567e-25	5.4379e-22	down
MMP25	3673.1	293.796	0.0799859	-3.24759	2.67737e-25	5.4379e-22	down
AOC3	79.483	12.6952	0.159723	-2.48052	2.00987e-24	3.75875e-21	down
RHOXF1P1	11.4277	0.233891	0.020467	-4.09674	7.71147e-24	1.15766e-20	down
KLHDC7A	6.49012	0.0203961	0.00314264	-4.02154	8.79682e-24	1.26557e-20	down
CMTM2	715.444	49.2599	0.0688522	-3.35587	5.08503e-23	6.75292e-20	down
CACNG8	35.2461	2.59623	0.0736599	-3.26228	6.81286e-23	8.11153e-20	down
BASP1	1941.03	414.679	0.213639	-2.11603	9.17604e-23	1.02203e-19	down
EPHB1	110.745	11.8542	0.107041	-2.89621	2.40663e-22	2.44401e-19	down
FCGR3B	7653.19	153.536	0.0200618	-4.23997	2.53079e-22	2.49666e-19	down
LRRC4	220.697	33.726	0.152816	-2.50401	1.1806e-21	1.08941e-18	down
AOC2	101.395	20.44	0.201587	-2.18263	1.43512e-21	1.27056e-18	down
EGR1	14318.9	1742.28	0.121677	-2.74682	1.17975e-20	9.05207e-18	down
FLOT2	5637.12	2660.01	0.471874	-1.06836	2.35166e-20	1.76517e-17	down
ZDHHC18	3575.2	1054.66	0.294994	-1.69787	3.27109e-20	2.40307e-17	down
ADGRE3	437.621	76.4695	0.174739	-2.33349	1.37851e-19	8.8143e-17	down
ALPL	1359.5	28.8742	0.0212388	-4.04236	2.07144e-19	1.23315e-16	down
CNTNAP3	131.975	3.99655	0.0302828	-3.82793	5.77914e-19	3.02336e-16	down
IER2	12540.5	2710.03	0.216102	-2.07942	7.61292e-19	3.80955e-16	down
MGAM	904.259	99.2716	0.109782	-2.8163	1.88877e-18	8.27674e-16	down
SLC45A4	898.716	307.863	0.342558	-1.49586	9.01433e-18	3.20873e-15	down
RPL39P3	2516.53	720.401	0.286267	-1.72656	1.21038e-17	4.22142e-15	down
FRAT2	1847.17	529.843	0.28684	-1.72327	1.22314e-17	4.22326e-15	down
TREML2	446.513	153.804	0.344456	-1.4872	1.23646e-17	4.22697e-15	down
AKAP12	66.2983	5.84318	0.0881348	-2.99324	1.9311e-17	6.06154e-15	down
RAB43	256.405	104.909	0.409154	-1.25853	2.14915e-17	6.68522e-15	down
SLC19A1	1022.08	306.815	0.300188	-1.6638	3.46856e-17	9.81661e-15	down
PTGS2	3572.24	353.21	0.0988765	-2.88831	3.64824e-17	1.01852e-14	down
FFAR2	2561.43	233.4	0.091121	-2.96067	4.2073e-17	1.16216e-14	down
C10orf82	7.74311	0.139535	0.0180205	-3.67802	4.59238e-17	1.2388e-14	down
TGFA	118.937	42.2561	0.355281	-1.43974	5.45837e-17	1.46098e-14	down
NLRP6	369.054	86.5458	0.234507	-1.96678	8.34946e-17	2.1676e-14	down
PDYN-AS1	14.8513	0.979659	0.0659645	-3.17388	8.90671e-17	2.29501e-14	down
BTNL8	124.72	5.30342	0.0425224	-3.51113	1.07505e-16	2.72937e-14	down
ICAM3	1186.25	434.632	0.366392	-1.40364	1.20288e-16	3.00965e-14	down
RGS2	9840	2728.3	0.277266	-1.76086	1.42235e-16	3.50792e-14	down
KCNJ15	887.652	77.5368	0.0873504	-2.98103	1.5863e-16	3.83019e-14	down
WLS	393.032	107.125	0.272561	-1.77937	1.5792e-16	3.83019e-14	down
TRIM64B	9.51998	0.360538	0.0378717	-3.48565	1.67716e-16	4.02058e-14	down
MBOAT7	4419.81	1246.51	0.282029	-1.73873	2.03049e-16	4.61242e-14	down
CXCL1	450.008	27.2495	0.0605535	-3.26202	2.70192e-16	5.94215e-14	down
ITGB8	20.1332	3.28129	0.162979	-2.35917	3.1825e-16	6.82518e-14	down
RPS13P2	81.5687	28.9795	0.355277	-1.44176	3.73552e-16	7.91288e-14	down
ASPRV1	96.7749	20.4468	0.211282	-2.08209	4.42283e-16	9.19948e-14	down
DPEP3	102.969	25.1436	0.244187	-1.91243	4.93047e-16	1.01438e-13	down
IFITM2	14421.1	3634.96	0.252059	-1.87079	1.33192e-15	2.38282e-13	down
KIAA1257	41.7174	8.46845	0.202996	-2.12222	1.68305e-15	2.94987e-13	down
B3GNT8	216.292	55.3494	0.255901	-1.8485	2.41344e-15	4.0063e-13	down
ZNF574	295.769	144.164	0.487421	-1.01639	2.74386e-15	4.44789e-13	down
BICDL2	22.4492	0.81324	0.0362257	-3.47606	3.78531e-15	5.88735e-13	down
LRFN1	358.608	124.258	0.346499	-1.47224	5.24067e-15	7.97135e-13	down
MOB3A	5183.03	2439.34	0.470639	-1.06514	2.2141e-14	2.84195e-12	down
RHEX	26.4904	6.24368	0.235696	-1.94281	2.45114e-14	3.11151e-12	down
ENPP3	33.0218	7.38831	0.223741	-1.98885	2.58582e-14	3.25851e-12	down
MID1IP1	1853.2	742.233	0.400514	-1.28016	3.15411e-14	3.91745e-12	down
OR2I1P	5.76181	0.39207	0.0680463	-3.01605	3.2619e-14	4.00808e-12	down
HCAR2	640.115	59.8451	0.0934912	-2.84325	4.13437e-14	4.99131e-12	down
N4BP3	148.013	55.1415	0.372545	-1.37522	5.60607e-14	6.43078e-12	down
LILRA4	155.092	43.0194	0.27738	-1.73609	6.90396e-14	7.71456e-12	down
PPL	45.1631	7.98796	0.176869	-2.24103	1.28297e-13	1.38433e-11	down
C4BPA	60.797	1.83705	0.0302161	-3.4358	1.51682e-13	1.62145e-11	down
SIGLEC5	39.8526	11.9593	0.300088	-1.63142	1.87851e-13	1.95366e-11	down
CD248	112.406	26.6377	0.236978	-1.92676	1.97887e-13	2.03213e-11	down
EGR3	602.1	92.9443	0.154367	-2.37454	2.31571e-13	2.3311e-11	down
CEACAM3	539.42	93.3216	0.173004	-2.2605	2.50071e-13	2.48117e-11	down
TGM3	35.5041	1.47019	0.041409	-3.29469	2.93568e-13	2.84728e-11	down
LSP1	11148.8	5329.36	0.478019	-1.04201	3.23614e-13	3.11247e-11	down
S100P	535.539	45.1352	0.0842798	-2.88437	3.41524e-13	3.24852e-11	down
NUAK2	1021.13	492.299	0.48211	-1.02993	4.07539e-13	3.80311e-11	down
CEP19	132.153	43.1123	0.326231	-1.53529	4.12659e-13	3.82069e-11	down
GATA2	811.099	177.256	0.218538	-2.00986	4.10958e-13	3.82069e-11	down
TIGD3	92.191	25.4127	0.275653	-1.74157	4.13849e-13	3.82069e-11	down
HRH4	38.813	10.299	0.265348	-1.78443	4.90239e-13	4.46622e-11	down
CADM4	57.6807	20.9427	0.36308	-1.39525	7.18726e-13	6.28257e-11	down
SFN	50.1047	10.0025	0.199632	-2.10043	9.41825e-13	7.95094e-11	down
TNF	1050.48	259.865	0.247377	-1.86492	9.46041e-13	7.96705e-11	down
KIAA1324	260.898	106.796	0.409338	-1.24513	1.08034e-12	8.83934e-11	down
JUNB	29562.9	10011.9	0.338662	-1.48837	1.41674e-12	1.12712e-10	down
LRG1	672.589	97.6656	0.145208	-2.41074	1.54578e-12	1.21578e-10	down
CA8	23.6734	6.14001	0.259364	-1.79535	1.83367e-12	1.42919e-10	down
FAM86B3P	65.0675	29.5543	0.454209	-1.10812	2.02396e-12	1.55989e-10	down
CASS4	242.152	112.962	0.466494	-1.07198	2.34523e-12	1.75653e-10	down
FBLN2	101.227	31.6603	0.312764	-1.58751	2.77327e-12	2.05044e-10	down
NOV	28.8813	3.8886	0.13464	-2.46321	2.80065e-12	2.06626e-10	down
TRIM51EP	13.1051	0.644869	0.0492075	-3.10263	3.38169e-12	2.45817e-10	down
MSRB1	2658.77	788.15	0.296434	-1.64739	3.81361e-12	2.72622e-10	down
CSNK1A1L	6.78919	0.405183	0.0596806	-3.00371	4.3947e-12	3.10307e-10	down
ARAP3	1065.32	459.649	0.431467	-1.17546	5.72804e-12	3.95555e-10	down
HDC	405.506	59.568	0.146898	-2.38132	6.38848e-12	4.36795e-10	down
REM2	372.053	126.141	0.339041	-1.48228	7.08001e-12	4.81218e-10	down
SLC7A8	32.097	10.4164	0.324528	-1.54468	7.16935e-12	4.86333e-10	down
NECAB2	45.0231	3.76053	0.0835245	-2.81643	8.09626e-12	5.43867e-10	down
PTGDR2	130.663	45.2748	0.346499	-1.45173	1.17895e-11	7.65167e-10	down
CXCL8	11563.5	894.061	0.0773173	-2.856	1.26314e-11	8.15208e-10	down
STX3	1128.84	469.928	0.416292	-1.22019	1.48986e-11	9.30235e-10	down
PLD4	854.583	321.479	0.376182	-1.35005	1.50274e-11	9.36582e-10	down
BAIAP2	297.944	140.398	0.471224	-1.05737	1.76879e-11	1.09059e-09	down
CD27	588.676	260.801	0.443029	-1.13859	1.78288e-11	1.09536e-09	down
DHRS13	184.751	82.1356	0.444575	-1.13104	1.98942e-11	1.20722e-09	down
KY	62.1419	3.73507	0.0601055	-2.97203	2.20988e-11	1.33864e-09	down
IER3	1991.15	446.74	0.224363	-1.95198	2.21619e-11	1.34011e-09	down
DGAT2	625.366	139.611	0.223247	-1.95525	2.68412e-11	1.59788e-09	down
RNVU1-6	11.395	2.22895	0.195609	-2.1164	3.81047e-11	2.1428e-09	down
CSF2RB	4247.71	1514.7	0.356592	-1.41452	3.94419e-11	2.21079e-09	down
DPEP2	2906.17	1415.87	0.487194	-1.01199	4.05378e-11	2.26487e-09	down
ALOX5AP	1536.19	672.828	0.437984	-1.15203	4.40457e-11	2.42553e-09	down
FAM83F	9.9372	1.73062	0.174156	-2.19261	4.9911e-11	2.7139e-09	down
G0S2	8825.62	720.801	0.0816715	-2.78236	5.19318e-11	2.8105e-09	down
KIAA0319	28.322	6.37521	0.225097	-1.93797	5.38995e-11	2.90334e-09	down
DHRS9	158.719	44.6562	0.281353	-1.69213	6.42353e-11	3.38613e-09	down
ST6GALNAC2	63.3152	17.526	0.276805	-1.70544	9.70568e-11	4.90656e-09	down
SYT2	26.602	8.93355	0.335823	-1.47366	1.04126e-10	5.21054e-09	down
HCAR3	255.855	35.9032	0.140326	-2.37614	1.13462e-10	5.645e-09	down
MPZL1	538.523	242.874	0.451001	-1.11066	1.58534e-10	7.64508e-09	down
PLIN4	183.103	45.4788	0.248378	-1.82554	2.04083e-10	9.61333e-09	down
MAP7	46.8843	18.3923	0.392291	-1.28471	2.15725e-10	1.00929e-08	down
TNFRSF13B	251.651	98.139	0.389981	-1.29763	2.18607e-10	1.02001e-08	down
RPL41P5	86.9997	37.0747	0.426148	-1.18065	3.20033e-10	1.43694e-08	down
FCGBP	712.929	257.991	0.361874	-1.39005	3.24853e-10	1.45669e-08	down
CSF2RBP1	8.66835	0.0797338	0.00919826	-3.09434	3.47241e-10	1.54704e-08	down
CXCL6	8.33716	1.0205	0.122404	-2.48231	4.0048e-10	1.75926e-08	down
MMP9	671	43.5724	0.0649365	-2.8292	4.1446e-10	1.81375e-08	down
CKLF	63.6165	24.4892	0.38495	-1.30714	4.80765e-10	2.05256e-08	down
MAGOH3P	2.73136	0.106765	0.0390886	-2.66978	4.95118e-10	2.10276e-08	down
UGT2B11	9.02632	1.14835	0.127223	-2.43651	6.48638e-10	2.67577e-08	down
RAB36	44.8805	16.0322	0.357221	-1.39307	6.66517e-10	2.74624e-08	down
C15orf39	2904.3	1338.08	0.460724	-1.08149	7.32747e-10	2.97415e-08	down
SCAMP5	124.058	48.5751	0.391552	-1.28361	7.33028e-10	2.97415e-08	down
PNPLA1	29.9286	11.3237	0.378358	-1.32072	9.07215e-10	3.6255e-08	down
TRPM6	78.2516	6.41583	0.0819898	-2.68613	9.09772e-10	3.63151e-08	down
ITGB4	36.7316	13.3838	0.364368	-1.3724	1.03896e-09	4.10919e-08	down
TMEM252	4.43896	0.464872	0.104725	-2.48917	1.04809e-09	4.13109e-08	down
CSF1	168.989	81.118	0.480019	-1.02742	1.42757e-09	5.4229e-08	down
DUSP1	34390	11530.7	0.335291	-1.47415	1.65768e-09	6.20786e-08	down
FRAT1	927.649	422.419	0.455365	-1.09422	1.71602e-09	6.38478e-08	down
ITM2C	1307.06	569.735	0.435891	-1.15069	1.89532e-09	6.99911e-08	down
DNASE1L3	35.5116	13.6096	0.383243	-1.30149	1.92368e-09	7.08112e-08	down
NAT8L	24.8659	5.36125	0.215606	-1.9322	2.56241e-09	9.16837e-08	down
PHF24	6.27901	0.537933	0.0856716	-2.58016	2.60185e-09	9.28063e-08	down
ZNF296	351.769	163.009	0.463397	-1.07214	2.94267e-09	1.03572e-07	down
RNU4ATAC	12.426	3.50858	0.282359	-1.66369	2.99645e-09	1.05251e-07	down
LUCAT1	463.467	132.889	0.286728	-1.64795	3.03016e-09	1.06327e-07	down
SH3RF3	80.2123	38.8394	0.484207	-1.01977	3.07842e-09	1.07627e-07	down
SUMO1P1	10.334	2.90541	0.281151	-1.65965	3.28376e-09	1.13155e-07	down
PTAFR	2699.73	1134.33	0.420166	-1.19606	3.44605e-09	1.17548e-07	down
GLT1D1	1302.65	504.176	0.387037	-1.29803	3.45454e-09	1.17631e-07	down
FAM43A	262.152	103.889	0.396292	-1.26822	3.63602e-09	1.22722e-07	down
PHOSPHO1	1591.53	380.146	0.238856	-1.83821	4.00819e-09	1.33974e-07	down
TNFAIP6	128.032	19.329	0.15097	-2.24106	5.02953e-09	1.6414e-07	down
CNFN	21.0073	8.54828	0.406919	-1.22472	5.34469e-09	1.73116e-07	down
ENTPD2	13.8948	1.39067	0.100086	-2.5094	5.68312e-09	1.83218e-07	down
TSPEAR	8.14267	1.198	0.147127	-2.24119	5.74587e-09	1.84724e-07	down
CCNA1	11.1137	2.50293	0.225211	-1.87644	6.03743e-09	1.93019e-07	down
MMP25-AS1	1124.24	532.489	0.473643	-1.04186	6.24704e-09	1.988e-07	down
PANX2	240.084	58.9011	0.245335	-1.80601	6.25342e-09	1.98819e-07	down
CLDN9	71.2157	17.095	0.240046	-1.83175	6.29435e-09	1.99937e-07	down
CCNJL	246.591	86.4016	0.350384	-1.41701	6.50589e-09	2.06088e-07	down
F8A3	29.2906	11.9906	0.409368	-1.215	7.01872e-09	2.19911e-07	down
ZNF775	96.2569	45.1735	0.469301	-1.05283	8.10293e-09	2.50473e-07	down
SLC12A1	64.5697	6.17903	0.0956955	-2.51818	9.11867e-09	2.78628e-07	down
PNOC	104.861	49.4426	0.471504	-1.04294	9.48741e-09	2.88618e-07	down
COL18A1	1437.32	482.813	0.335912	-1.4622	9.86182e-09	2.9948e-07	down
NYNRIN	12.2822	5.02881	0.409438	-1.19955	1.0151e-08	3.07182e-07	down
MED25	1983.19	953.471	0.480776	-1.02094	1.10895e-08	3.32665e-07	down
PTPRN2	220.597	101.678	0.460922	-1.07387	1.29107e-08	3.80035e-07	down
NOG	206.696	54.1248	0.261857	-1.73197	1.54234e-08	4.47582e-07	down
PHYHD1	26.1281	12.5519	0.480399	-1.02372	1.54061e-08	4.47582e-07	down
STEAP4	759.732	233.136	0.306866	-1.56038	1.54258e-08	4.47582e-07	down
ATP2B1-AS1	475.695	208.549	0.43841	-1.13799	1.59103e-08	4.60478e-07	down
SHANK1	21.1169	6.88016	0.325813	-1.51206	1.62389e-08	4.67638e-07	down
KAZN	18.5938	4.67379	0.251363	-1.79139	1.65213e-08	4.74188e-07	down
OLIG1	267.779	124.98	0.46673	-1.05833	1.68638e-08	4.81314e-07	down
C3orf86	105.131	31.5676	0.30027	-1.58419	1.77556e-08	5.0169e-07	down
GHRL	73.3314	33.6965	0.459509	-1.08038	1.7925e-08	5.05473e-07	down
GPR27	207.158	70.3748	0.339715	-1.44196	1.8021e-08	5.06702e-07	down
ASF1B	167.915	79.7018	0.474654	-1.0329	1.83684e-08	5.14376e-07	down
C5AR1	3761.76	1287.09	0.34215	-1.43611	2.08978e-08	5.75405e-07	down
LGALS9C	97.1503	35.4987	0.365399	-1.36001	2.11271e-08	5.8092e-07	down
FLT1P1	4.31383	0.200781	0.0465435	-2.62192	2.16082e-08	5.91664e-07	down
CDH2	6.7636	1.36134	0.201274	-1.93664	2.22668e-08	6.05377e-07	down
HSPA6	1391.49	445.674	0.320286	-1.51057	2.23486e-08	6.07122e-07	down
TNNT3	120.105	52.3019	0.435466	-1.15015	2.2409e-08	6.08286e-07	down
LILRA2	1944.47	843.615	0.433854	-1.14975	2.37782e-08	6.40916e-07	down
MYBPH	13.709	1.82008	0.132765	-2.27485	2.73954e-08	7.26504e-07	down
S1PR4	2691.33	1208.39	0.448995	-1.10611	2.95313e-08	7.72467e-07	down
ADORA1	9.12235	2.45317	0.268919	-1.69192	3.2286e-08	8.35661e-07	down
OTX1	12.5637	0.667232	0.053108	-2.65236	3.67743e-08	9.3916e-07	down
KCNB1	10.665	3.07289	0.288128	-1.63541	3.93488e-08	9.98263e-07	down
TMEM272	122.637	52.7087	0.429796	-1.16197	4.61136e-08	1.14878e-06	down
AOC1	11.2055	0.898417	0.0801764	-2.50119	4.97899e-08	1.22359e-06	down
KDM6B	4155.93	1911.51	0.459948	-1.07367	5.88009e-08	1.41188e-06	down
CACNA1E	37.4383	6.46648	0.172724	-2.07789	5.92431e-08	1.42052e-06	down
IGLV3-9	127.168	23.1091	0.181721	-2.03805	6.03742e-08	1.44563e-06	down
SLC16A11	48.1383	22.6717	0.470969	-1.04509	6.0815e-08	1.45417e-06	down
HSPA1A	1417.37	610.242	0.430546	-1.15613	6.23833e-08	1.48858e-06	down
NRCAM	40.4915	13.247	0.327156	-1.47855	7.31194e-08	1.7198e-06	down
MMP15	20.9055	8.63138	0.412877	-1.19052	7.99063e-08	1.8607e-06	down
CMTM1	41.9647	18.2393	0.434635	-1.13018	8.51392e-08	1.96898e-06	down
NTRK1	43.5934	16.432	0.376938	-1.32522	8.77855e-08	2.02476e-06	down
PROK2	676.616	192.658	0.284738	-1.62386	8.83546e-08	2.03652e-06	down
BEST1	561.368	264.844	0.471783	-1.03947	9.43185e-08	2.15385e-06	down
CYSTM1	221.439	99.6207	0.449878	-1.09875	9.45144e-08	2.1569e-06	down
NFE4	49.7301	6.73232	0.135377	-2.23837	1.13055e-07	2.51519e-06	down
PLIN5	132.505	34.2103	0.258181	-1.71807	1.18132e-07	2.62138e-06	down
TRIM51BP	10.1773	1.32604	0.130293	-2.23357	1.20846e-07	2.67644e-06	down
PTX3	211.902	66.5313	0.313971	-1.51656	1.37512e-07	3.00128e-06	down
SLC7A3	7.55993	1.21159	0.160264	-2.09911	1.43971e-07	3.1284e-06	down
HMGB1P10	28.7889	13.9995	0.486281	-1.00378	1.46961e-07	3.17937e-06	down
SCT	28.7485	11.938	0.415257	-1.1904	1.59998e-07	3.43345e-06	down
F2RL1	163.168	58.9019	0.360989	-1.35711	1.66119e-07	3.55156e-06	down
MIR5684	4.2285	0.757734	0.179197	-1.99043	1.73633e-07	3.69731e-06	down
REG4	18.415	4.85404	0.263591	-1.71681	1.74674e-07	3.71605e-06	down
KRT81	12.765	3.42626	0.26841	-1.67695	1.76294e-07	3.74359e-06	down
FABP6	4.58052	0.7239	0.158039	-2.10804	1.78561e-07	3.78475e-06	down
TREM1	2138.94	734.227	0.343267	-1.41643	1.92513e-07	4.05311e-06	down
EVPL	20.7447	7.09476	0.342003	-1.43628	2.22129e-07	4.58439e-06	down
RAB3D	644.634	303.083	0.470163	-1.04066	2.30357e-07	4.71753e-06	down
SNORD3B-1	36.4038	8.78954	0.241446	-1.77559	2.34397e-07	4.7889e-06	down
ADGRG3	835.959	139.909	0.167364	-2.06714	2.35293e-07	4.80437e-06	down
CNTNAP3C	18.0735	0.737886	0.040827	-2.53309	2.68058e-07	5.38738e-06	down
ORM1	28.1458	5.2539	0.186667	-1.98241	2.83581e-07	5.64867e-06	down
CSF3R	25194.1	10673.2	0.423641	-1.16959	2.90311e-07	5.75423e-06	down
TSPAN16	24.1238	8.62066	0.357351	-1.35509	2.94838e-07	5.83057e-06	down
FCER1A	412.92	153.559	0.371885	-1.32244	3.20889e-07	6.28272e-06	down
CA4	95.9251	6.82779	0.0711784	-2.44099	3.55309e-07	6.89607e-06	down
FPR2	869.488	246.362	0.283341	-1.6114	3.58139e-07	6.9354e-06	down
KIAA1211L	24.2095	10.7691	0.444832	-1.10435	3.58539e-07	6.93926e-06	down
TRIB1	2501.79	1004.43	0.401486	-1.23241	3.71845e-07	7.16466e-06	down
KCNA5	5.24246	1.2361	0.235787	-1.72344	4.15761e-07	7.94873e-06	down
HNRNPA1P52	6.9165	0.905337	0.130895	-2.18888	4.2493e-07	8.10608e-06	down
RPL12P27	11.3307	4.08274	0.360327	-1.34077	4.44224e-07	8.42294e-06	down
PRR33	1181.01	562.628	0.476396	-1.02322	4.51267e-07	8.5144e-06	down
DAPK2	336.944	157.139	0.466364	-1.04867	4.63729e-07	8.6784e-06	down
C10orf105	47.6073	17.1871	0.361017	-1.35112	5.13255e-07	9.50223e-06	down
C2orf40	12.1634	5.04212	0.414531	-1.20879	5.39979e-07	9.92779e-06	down
PADI2	877.937	312.584	0.356044	-1.36684	5.59198e-07	1.02538e-05	down
DLEU7	34.307	14.7989	0.431366	-1.12977	6.08265e-07	1.10422e-05	down
CDA	828.467	333.331	0.402346	-1.2259	6.79893e-07	1.21697e-05	down
GNG12-AS1	7.4597	2.35059	0.315104	-1.46029	6.92169e-07	1.23446e-05	down
ARHGEF4	56.4124	27.4133	0.485944	-1.00853	6.98337e-07	1.24354e-05	down
LRCOL1	6.7188	1.81451	0.270065	-1.63318	7.43046e-07	1.31031e-05	down
RBKS	122.935	43.4638	0.353552	-1.36995	8.02442e-07	1.39933e-05	down
SLC22A1	19.1946	6.92763	0.360916	-1.34218	8.08546e-07	1.40855e-05	down
CIB3	10.0852	2.7851	0.276157	-1.62229	8.1062e-07	1.41145e-05	down
GALNT14	19.3018	6.41018	0.332102	-1.43347	8.33389e-07	1.44818e-05	down
BTNL3	57.5114	1.07052	0.0186141	-2.40265	8.48452e-07	1.46949e-05	down
ALG1L13P	15.8544	6.79822	0.428791	-1.15216	8.5661e-07	1.47885e-05	down
NFAM1	5361.84	2478.83	0.462311	-1.05777	8.67373e-07	1.49576e-05	down
ADORA2A	35.6955	16.8208	0.471231	-1.04013	9.06805e-07	1.55385e-05	down
AATK	803.671	301.496	0.375148	-1.30488	9.14069e-07	1.56397e-05	down
LEP	3.03461	0.316553	0.104314	-2.19748	9.2242e-07	1.57664e-05	down
IL4	8.688	2.15297	0.24781	-1.74559	1.08853e-06	1.82273e-05	down
FUT7	326.972	153.425	0.469229	-1.03809	1.11864e-06	1.86591e-05	down
HCST	727.889	345.62	0.474825	-1.02391	1.14432e-06	1.90231e-05	down
IGHM	21492.5	9623.84	0.447776	-1.09499	1.33717e-06	2.17782e-05	down
BFSP2-AS1	4.73651	1.67441	0.353512	-1.39065	1.35366e-06	2.20052e-05	down
TEX101	5.72466	0.980844	0.171337	-1.97702	1.43473e-06	2.31596e-05	down
HECW2	30.2253	12.775	0.422658	-1.1523	1.59287e-06	2.55095e-05	down
LRRC26	10.2143	2.55971	0.2506	-1.68387	1.67516e-06	2.66913e-05	down
CEBPE	61.3204	20.9144	0.341067	-1.40569	1.70398e-06	2.71129e-05	down
FOS	33973.7	14000.2	0.41209	-1.19204	1.78991e-06	2.83341e-05	down
ALOX15	9.9187	2.55128	0.25722	-1.66486	1.80804e-06	2.8545e-05	down
EPHA2	36.9282	13.5655	0.367348	-1.3116	1.93484e-06	3.03527e-05	down
HPGDS	7.19232	2.64048	0.367125	-1.29007	2.02626e-06	3.16001e-05	down
KDF1	19.758	9.41579	0.476556	-1.03081	2.21546e-06	3.41041e-05	down
VNN2	2504.24	1157.37	0.462163	-1.05357	2.31846e-06	3.54682e-05	down
EFNA3	18.6737	8.65834	0.463665	-1.05346	2.3224e-06	3.55127e-05	down
CYP4F12	21.2287	7.17486	0.337979	-1.40965	2.45647e-06	3.72986e-05	down
PRSS33	12.5021	1.80682	0.144521	-2.06703	2.563e-06	3.86646e-05	down
MIR4539	86.939	32.7626	0.376846	-1.2878	3.04139e-06	4.46485e-05	down
RHOXF1P2	5.30683	0.754794	0.142231	-2.04725	3.05439e-06	4.48203e-05	down
PACERR	6.42808	0.948456	0.147549	-2.03384	3.34933e-06	4.85906e-05	down
MIR4537	113.733	43.4994	0.38247	-1.26895	3.90133e-06	5.56139e-05	down
RARA-AS1	149.241	69.9331	0.468591	-1.03272	4.30366e-06	6.06518e-05	down
MRVI1-AS1	14.0888	5.96829	0.423618	-1.13881	4.44305e-06	6.23616e-05	down
RNU6-176P	4.70558	1.05164	0.223488	-1.72077	4.57553e-06	6.39353e-05	down
EGR2	415.202	137.23	0.330514	-1.42216	4.62345e-06	6.45526e-05	down
RF00004	52.8361	13.2338	0.250469	-1.67807	4.64154e-06	6.47308e-05	down
VNN3	378.729	139.663	0.368767	-1.30744	4.79286e-06	6.64342e-05	down
CCL3	831.612	238.75	0.287093	-1.55699	4.96586e-06	6.86394e-05	down
CUX2	27.6816	12.3654	0.446701	-1.08216	5.18603e-06	7.11132e-05	down
OSM	847.613	241.711	0.285166	-1.55898	6.08267e-06	8.17526e-05	down
MIR1250	3.1568	0.64208	0.203396	-1.77885	6.29601e-06	8.42918e-05	down
NXPH4	32.7764	13.2193	0.403317	-1.20987	6.48591e-06	8.63987e-05	down
CELA1	14.8701	6.89559	0.463722	-1.05673	6.62274e-06	8.80569e-05	down
AFF2	16.4528	7.69061	0.467434	-1.04537	8.02804e-06	0.000104113	down
FPR1	5072.63	1851.5	0.364999	-1.31293	8.02981e-06	0.000104113	down
SFRP5	30.4833	9.23379	0.302913	-1.51462	8.10702e-06	0.000104839	down
RHOB	4994.87	2351.77	0.470837	-1.02449	8.43279e-06	0.00010858	down
ROPN1L	60.6308	25.7775	0.425155	-1.14783	8.43405e-06	0.00010858	down
SLPI	106.044	15.9989	0.150871	-1.97873	9.68973e-06	0.000122328	down
CLEC9A	23.817	9.59802	0.40299	-1.19765	1.02775e-05	0.000128526	down
SPINK2	16.2977	7.43575	0.456247	-1.0775	1.11279e-05	0.000137814	down
MFSD6L	17.2882	7.64233	0.442054	-1.10068	1.15535e-05	0.000142074	down
RPS4XP1	7.86811	3.08394	0.391955	-1.23354	1.15485e-05	0.000142074	down
PCBP3	34.5954	16.1582	0.467062	-1.03377	1.16617e-05	0.000143141	down
PPP1R15A	8905.68	4154.6	0.46651	-1.03348	1.20789e-05	0.000147684	down
TCN1	66.9914	8.27976	0.123594	-2.04472	1.22858e-05	0.000149631	down
CYP11A1	4.90703	1.23023	0.250707	-1.67218	1.23062e-05	0.000149827	down
CLEC4C	38.3442	16.2042	0.422598	-1.13653	1.32386e-05	0.000160162	down
TPSAB1	7.5428	1.4648	0.194198	-1.81086	1.37413e-05	0.000165202	down
AGAP7P	129.928	60.7544	0.4676	-1.03022	1.40414e-05	0.00016834	down
IL1RN	998.091	412.239	0.413027	-1.17217	1.46948e-05	0.000174778	down
SCARA5	7.30869	2.03987	0.279102	-1.54394	1.53551e-05	0.000180949	down
RBMXP2	4.81998	2.13602	0.44316	-1.07055	1.53697e-05	0.00018106	down
PRSS3	2.88998	0.672931	0.23285	-1.64796	1.60524e-05	0.00018833	down
CNTNAP3P2	1.76497	0.0860206	0.0487376	-2.00697	1.62025e-05	0.000189658	down
B4GALNT3	103.633	36.4508	0.351729	-1.34196	1.6462e-05	0.000192352	down
MIR6779	2.80557	0.723831	0.257998	-1.61985	1.6712e-05	0.00019468	down
MIR497HG	9.2834	3.79854	0.409176	-1.16333	1.88603e-05	0.000215704	down
NFKBIA	18114.4	8365.45	0.461812	-1.04255	1.8856e-05	0.000215704	down
KCNS1	8.22297	2.76634	0.336416	-1.37051	2.13632e-05	0.000239958	down
PRDM5	19.5666	7.94509	0.406055	-1.17681	2.16081e-05	0.000241999	down
MIR33B	4.46386	1.0439	0.233855	-1.6942	2.22539e-05	0.000248266	down
RNU4-2	5.60411	1.41658	0.252775	-1.61279	2.45296e-05	0.000270437	down
QPCT	536.503	226.939	0.422996	-1.14015	2.49367e-05	0.000274471	down
IGHA2	7152.93	2402.31	0.33585	-1.37991	2.49594e-05	0.000274545	down
CBS	6.06216	1.42061	0.23434	-1.68126	2.50901e-05	0.000275808	down
CD34	14.1276	5.59784	0.396235	-1.1943	2.53732e-05	0.000278476	down
IFIT2	1414.87	480.494	0.339602	-1.36647	2.88972e-05	0.000311996	down
MNDA	7692.49	3368.8	0.437934	-1.09999	3.02106e-05	0.000324149	down
FBXL13	17.1589	7.63924	0.445205	-1.0831	3.17438e-05	0.000338359	down
FXYD6	81.3739	35.1227	0.431622	-1.11205	3.17926e-05	0.000338598	down
TAS2R40	2.10337	0.295065	0.140282	-1.85182	3.3314e-05	0.000352114	down
CD200R1L	3.44256	0.536406	0.155816	-1.85763	3.39008e-05	0.000357304	down
GUCY2D	16.62	7.61296	0.458062	-1.04748	3.41009e-05	0.000358974	down
MYCL	450.055	213.576	0.474555	-1.0053	3.45217e-05	0.000362299	down
RPL21P39	2.74542	0.653819	0.238149	-1.63596	3.55e-05	0.000370875	down
PLA2G2D	10.4684	4.63526	0.442784	-1.09312	3.73089e-05	0.000386383	down
DLGAP1-AS3	5.89789	1.94863	0.330395	-1.42735	4.02253e-05	0.000412504	down
TMEM240	16.3465	7.01816	0.429336	-1.12487	4.16722e-05	0.000425823	down
PGLYRP1	227.944	45.3814	0.19909	-1.76113	4.19605e-05	0.000428389	down
CAPNS2	12.2399	4.35333	0.355667	-1.32472	4.42545e-05	0.000447837	down
RF00017	118.017	42.3472	0.358823	-1.30426	4.63011e-05	0.000464195	down
KRT5	29.8158	10.927	0.366486	-1.27403	4.7609e-05	0.000475649	down
FOLR3	493.448	164.878	0.334134	-1.37141	4.89745e-05	0.000486756	down
HEY1	6.21286	2.01996	0.325125	-1.39868	5.04236e-05	0.000499004	down
PPP1R3G	12.7123	5.76574	0.453557	-1.036	5.2304e-05	0.000514077	down
CCL4L2	443.724	159.522	0.359507	-1.30021	5.42981e-05	0.000531106	down
RBAKDN	6.37293	2.79971	0.439313	-1.10546	5.46663e-05	0.00053359	down
PPP1R27	8.87789	2.60505	0.293431	-1.4986	5.51062e-05	0.000537032	down
MGAM2	10.8989	2.81647	0.258417	-1.58211	5.70885e-05	0.000553694	down
TNFRSF17	124.128	55.3886	0.44622	-1.06909	6.20189e-05	0.000595492	down
LUNAR1	8.39298	2.93611	0.349829	-1.33463	6.688e-05	0.000634754	down
GRIN1	11.0648	3.74142	0.338138	-1.35178	6.71177e-05	0.00063666	down
DES	17.716	6.66228	0.376059	-1.23267	6.90737e-05	0.000651811	down
DSG3	2.20365	0.17781	0.0806889	-1.90917	6.94673e-05	0.000654274	down
F7	4.89015	1.61966	0.331208	-1.37585	6.97916e-05	0.00065679	down
CHRNB2	16.4219	5.82219	0.354538	-1.29022	7.8304e-05	0.000726015	down
XKR3	4.20565	0.932867	0.221813	-1.65674	7.87905e-05	0.000729351	down
TRAV38-1	13.0102	5.1024	0.392185	-1.19952	8.88855e-05	0.000811486	down
STAC2	2.54574	0.587847	0.230914	-1.69749	9.29577e-05	0.000844421	down
TMEM52	2.26975	0.618939	0.272691	-1.51395	9.7835e-05	0.000883611	down
AQP9	1879.66	731.228	0.38902	-1.21109	0.00010318	0.000922953	down
MIR4538	32.0599	12.1293	0.378331	-1.23727	0.00010442	0.000932352	down
ANKRD2	2.53848	0.468974	0.184746	-1.68778	0.000104583	0.000933564	down
SOWAHD	126.692	60.8704	0.480462	-0.999985	4.09783e-06	5.81545e-05	down
NECTIN1	291.956	140	0.479525	-0.999856	1.18622e-05	0.00014524	down
DHX34	1195.74	586.312	0.490334	-0.9987	1.51742e-09	5.70735e-08	down
LRP10	5323.17	2634.29	0.494872	-0.995667	1.28965e-13	1.3872e-11	down
ZNF469	160.728	78.3392	0.487404	-0.995257	2.79881e-07	5.58378e-06	down
AMN	96.5821	47.1895	0.488595	-0.995117	5.3473e-07	9.84177e-06	down
RPL6P27	1511.82	748.847	0.495329	-0.993374	6.38286e-13	5.63948e-11	down
LYPD3	30.3101	14.6214	0.482393	-0.992248	3.25928e-06	4.75009e-05	down
EXTL3	1034.7	514.835	0.497568	-0.98407	8.71611e-12	5.84368e-10	down
MMP28	39.2094	19.054	0.485954	-0.983211	6.32812e-05	0.000604586	down
NINJ2	201.71	100.478	0.498134	-0.98214	2.31565e-13	2.3311e-11	down
DOK4	56.5126	27.8226	0.492326	-0.981565	1.04546e-07	2.35524e-06	down
CEBPA	522.471	255.704	0.489412	-0.977851	6.34619e-06	8.48649e-05	down
MGAT3	84.5559	41.5719	0.49165	-0.977036	2.30866e-06	3.53497e-05	down
PEAK3	232.092	113.347	0.488369	-0.975979	1.65506e-05	0.000193186	down
IL1R1	117.881	57.4648	0.487481	-0.975697	1.92099e-05	0.000219049	down
TCAP	135.447	66.9575	0.494343	-0.975363	1.07451e-06	1.80012e-05	down
SPIB	389.52	192.214	0.493465	-0.972667	2.36892e-06	3.61281e-05	down
APOBR	5485.66	2728.41	0.497371	-0.970807	1.69486e-07	3.61905e-06	down
RASGRP4	2411.33	1200.31	0.497781	-0.97035	1.28109e-07	2.81922e-06	down
AEBP1	338.192	168.71	0.498859	-0.966934	2.41527e-07	4.91712e-06	down
HAL	419.624	208.822	0.49764	-0.965331	6.70651e-07	1.20355e-05	down
KLF5	65.0832	32.26	0.495673	-0.965164	1.78136e-06	2.82271e-05	down
LRP3	272.797	134.521	0.493118	-0.964915	1.50053e-05	0.000177676	down
ADAMTS7P1	33.0367	16.5046	0.499584	-0.960791	1.51338e-05	0.000178829	down
DOCK9-DT	15.6185	7.80164	0.499514	-0.960448	2.25149e-06	3.45816e-05	down
GPR25	67.5552	33.0937	0.489877	-0.960319	8.94298e-05	0.000815807	down
FZD8	10.9683	5.28903	0.482212	-0.958568	7.43892e-05	0.000694379	down
TRAV1-2	34.0719	16.6685	0.489215	-0.95571	7.6932e-05	0.00071483	down
EEF1AKMT4	21.9969	10.9432	0.497488	-0.953903	5.78613e-07	1.0565e-05	down
CACHD1	28.4658	14.1922	0.498571	-0.945544	0.000101614	0.000911302	down
RGPD3	5.82679	11.7619	2.01859	0.938871	5.91348e-05	0.000571455	up
ECM1	19.4017	39.5291	2.03741	0.95185	6.98108e-05	0.000656793	up
TUBA4A	2546.43	5106.37	2.0053	0.954318	7.54787e-06	9.86422e-05	up
FTH1P11	5.04077	10.2957	2.04249	0.954768	6.16773e-05	0.000592826	up
APCDD1	34.559	69.5214	2.01167	0.957078	3.36837e-06	4.88053e-05	up
MEF2C-AS1	29.6518	59.8954	2.01996	0.963772	9.5289e-07	1.61996e-05	up
BCAS2P2	9.60052	19.623	2.04395	0.963859	5.46648e-05	0.00053359	up
ARHGAP29	11.5242	23.6091	2.04866	0.964888	8.19887e-05	0.000754313	up
FAM69B	97.1062	197.333	2.03214	0.965216	1.68602e-05	0.000196088	up
OCLM	11.7784	24.1923	2.05395	0.968057	6.49106e-05	0.000618612	up
CDK1	22.0844	44.2038	2.00158	0.968956	4.52343e-07	8.52538e-06	up
ACOT7	147.338	297.351	2.01815	0.969041	1.09983e-06	1.83809e-05	up
XRCC2	17.6989	35.9664	2.03213	0.971712	1.03464e-06	1.74178e-05	up
RLF	420.541	842.652	2.00373	0.97575	8.71429e-10	3.50684e-08	up
SMG1P6	11.1098	22.85	2.05674	0.979204	1.43045e-05	0.000171235	up
MAX	3006.78	6108.95	2.03172	0.980141	6.16065e-07	1.11779e-05	up
FAM13A	241.643	484.884	2.00662	0.981044	2.66559e-11	1.58959e-09	up
LYPLAL1	209.171	422.267	2.01877	0.982462	3.54623e-09	1.20161e-07	up
FKBP1B	20.9235	42.9092	2.05077	0.982785	2.5156e-06	3.80459e-05	up
CYB5R3	1577.52	3237.42	2.05223	0.987886	2.34573e-06	3.57903e-05	up
TLK1	804.998	1618.14	2.01012	0.988854	2.55069e-14	3.22602e-12	up
PIGA	215.787	440.211	2.04003	0.988922	1.94608e-07	4.08973e-06	up
NUTM2A-AS1	201.111	405.742	2.0175	0.989402	1.20692e-12	9.69133e-11	up
RAB4A	422.954	856.134	2.02418	0.992473	3.10911e-11	1.80423e-09	up
BRD7P2	9.67476	20.0688	2.07435	0.99258	1.44161e-05	0.000172333	up
RPL23AP64	15.0876	31.3733	2.07941	0.99276	8.12936e-06	0.000105088	up
RAB11A	1307.18	2649.2	2.02665	0.993717	8.03088e-11	4.14485e-09	up
SPHK1	243.374	503.738	2.06981	0.9954	4.49641e-06	6.2957e-05	up
CMPK1	1716.13	3473.55	2.02407	0.996863	4.02842e-13	3.76947e-11	up
F13A1	2938.3	19141.3	6.5144	2.53153	2.91815e-26	7.7506e-23	up
PROS1	44.4886	526.794	11.8411	3.17596	6.28463e-26	1.54997e-22	up
ARHGAP21	454.41	1467.02	3.22841	1.64574	1.41048e-25	3.24674e-22	up
RIOK3	1260.99	2645.11	2.09765	1.05646	2.06836e-24	3.75875e-21	up
XK	68.3546	633.304	9.26497	2.90242	3.9745e-24	6.53484e-21	up
PRKAR2B	1146.03	8558.49	7.46793	2.66984	4.70671e-24	7.38696e-21	up
EGF	83.7276	764.202	9.12725	2.88081	1.12009e-23	1.54698e-20	up
CDC42BPA	21.9263	80.927	3.69086	1.80825	5.95709e-23	7.61802e-20	up
SPX	48.0118	440.348	9.17167	2.87537	6.72012e-23	8.11153e-20	up
SPARC	3627.6	27569.9	7.60003	2.67693	7.25233e-23	8.34695e-20	up
PCSK6	137.582	1197.05	8.70062	2.81753	1.24392e-22	1.34219e-19	up
ARHGEF12	404.907	1741.82	4.30177	2.00721	2.15643e-22	2.25628e-19	up
PKHD1L1	40.1979	321.84	8.0064	2.72121	5.6958e-22	5.46291e-19	up
PGRMC1	1343.21	8618.41	6.41629	2.47724	1.19896e-21	1.08941e-18	up
MOB1B	528.105	1130.92	2.14146	1.0824	3.00047e-21	2.59001e-18	up
PLOD2	10.0068	81.5086	8.14536	2.72358	5.12002e-21	4.3118e-18	up
ELOVL7	115.935	759.917	6.5547	2.49133	9.73796e-21	7.88307e-18	up
FRMD4B	183.275	394.706	2.15363	1.0889	9.81731e-21	7.88307e-18	up
ITGB3	374.005	3027.47	8.09473	2.71574	1.14972e-20	9.02215e-18	up
PPBP	2638.25	24052.9	9.117	2.82402	5.37082e-20	3.86341e-17	up
C12orf75	511.724	1549.06	3.02715	1.54822	9.42203e-20	6.50648e-17	up
GUCY1B1	105.012	669.21	6.37272	2.44916	9.77884e-20	6.62047e-17	up
ARHGAP18	248.118	831.578	3.35154	1.67982	1.10319e-19	7.18698e-17	up
RNF11	1197.06	5081.52	4.24499	1.97643	1.57276e-19	9.69718e-17	up
LNCAROD	9.53307	90.7936	9.52407	2.85452	1.70325e-19	1.03175e-16	up
SH3BGRL2	593.854	3978.49	6.69943	2.49984	2.10937e-19	1.23445e-16	up
CMAHP	253.554	528.155	2.08301	1.04215	2.70941e-19	1.53361e-16	up
SMILR	2.59924	29.0655	11.1823	3.00136	3.41235e-19	1.90035e-16	up
PF4V1	144.649	1257.87	8.69603	2.76307	3.48763e-19	1.91145e-16	up
BEND2	122.765	822.159	6.69701	2.49583	3.77951e-19	2.03905e-16	up
ANO2	1.98366	22.5505	11.3681	2.99134	5.66283e-19	3.0081e-16	up
SMIM3	306.464	1468.32	4.79115	2.11705	7.07384e-19	3.64546e-16	up
MTURN	1353.3	6320.35	4.67033	2.08685	7.54263e-19	3.80955e-16	up
GNG11	1021.73	6185.3	6.05377	2.38284	8.05014e-19	3.97079e-16	up
FHL1	232.552	1269.03	5.45697	2.26549	1.06344e-18	5.17159e-16	up
ENDOD1	369.236	1523.78	4.12686	1.93669	1.11215e-18	5.3334e-16	up
TREML1	702.651	5338.15	7.59715	2.62036	1.1415e-18	5.39914e-16	up
CLEC1B	185.631	625.562	3.36993	1.68303	1.36802e-18	6.38309e-16	up
SYNM	89.7598	346.178	3.85672	1.85241	1.40406e-18	6.46389e-16	up
RHOBTB1	102.108	586.656	5.74548	2.32079	1.73796e-18	7.89584e-16	up
TTC7B	125.195	749.826	5.98925	2.36643	1.87409e-18	8.27674e-16	up
C2orf88	546.966	2912.45	5.32474	2.23547	1.89372e-18	8.27674e-16	up
NCKAP1	74.9318	297.988	3.97679	1.88784	2.08661e-18	9.00583e-16	up
LEPR	83.9762	292.341	3.48124	1.72177	2.6419e-18	1.11243e-15	up
RTCA-AS1	11.9734	52.2249	4.36173	1.99021	2.85716e-18	1.18858e-15	up
MMP1	1.7732	38.4682	21.6943	3.42732	2.91136e-18	1.19415e-15	up
PDE5A	187.36	844.437	4.50703	2.03969	2.93973e-18	1.19415e-15	up
MMRN1	46.6735	395.119	8.46559	2.7179	3.19965e-18	1.28462e-15	up
ABLIM3	289.279	2042.4	7.0603	2.53534	4.96877e-18	1.92766e-15	up
CALD1	42.1401	311.963	7.40299	2.58189	5.43529e-18	2.08522e-15	up
ACVR1	205.487	496.147	2.41449	1.24206	5.51578e-18	2.09285e-15	up
PRKG1	4.2387	35.4697	8.36806	2.69474	6.20357e-18	2.30319e-15	up
TRHDE	1.50143	24.2531	16.1533	3.22578	6.92565e-18	2.51714e-15	up
ITGA2B	2406.63	23242.2	9.65756	2.83225	8.2695e-18	2.97426e-15	up
FAXDC2	294.445	1696.4	5.76136	2.31577	9.3677e-18	3.30049e-15	up
LEPROT	939.93	2060.85	2.19256	1.11205	1.26927e-17	4.2966e-15	up
ANO6	1051.33	3331.49	3.16883	1.60096	1.30566e-17	4.37689e-15	up
MMD	906.196	4677.92	5.16214	2.19176	1.3543e-17	4.48028e-15	up
CTNNAL1	34.6873	148.765	4.28875	1.97447	1.36246e-17	4.48028e-15	up
CLIC4	393.089	970.553	2.46904	1.27246	1.59263e-17	5.13929e-15	up
ZNF367	106.578	259.165	2.43169	1.25016	1.7438e-17	5.575e-15	up
P2RY1	47.3562	147.476	3.11418	1.5745	1.86395e-17	5.90444e-15	up
MTMR2	160.376	332.817	2.07523	1.03387	2.30982e-17	7.12084e-15	up
TFPI	14.7906	79.6206	5.3832	2.23612	2.38423e-17	7.28519e-15	up
SELP	172.782	1111.86	6.43507	2.42845	2.4865e-17	7.44758e-15	up
FRMD3	133.816	529.276	3.95524	1.87621	2.50208e-17	7.44758e-15	up
XPNPEP1	796.521	1679.5	2.10854	1.05816	2.46483e-17	7.44758e-15	up
THBS1	576.437	3215.7	5.57858	2.2752	2.52998e-17	7.46626e-15	up
LY6G6F	29.4879	207.34	7.03135	2.51825	2.73179e-17	7.92631e-15	up
PRTFDC1	18.8231	85.5674	4.54588	2.03782	2.87323e-17	8.26723e-15	up
ASAP2	34.4132	147.448	4.28463	1.96696	4.45816e-17	1.22168e-14	up
GUCY1A1	56.7118	298.582	5.2649	2.20654	4.57521e-17	1.2388e-14	up
PTK2	151.554	458.206	3.02338	1.53683	5.91759e-17	1.57171e-14	up
SNCA	203.354	1345.44	6.61623	2.44984	7.1476e-17	1.88391e-14	up
PCYT1B	36.0218	232.81	6.46305	2.42512	7.91807e-17	2.07117e-14	up
FSTL1	60.6926	509.585	8.39617	2.67984	9.38947e-17	2.40148e-14	up
PLA2G12A	245.485	852.654	3.47335	1.71224	1.19189e-16	3.00391e-14	up
PSD3	23.9095	79.9348	3.34323	1.65884	1.39107e-16	3.45546e-14	up
DOK6	57.0417	170.001	2.9803	1.51447	1.47531e-16	3.61273e-14	up
RAB6B	96.167	620.537	6.4527	2.41788	1.68844e-16	4.02058e-14	up
VEGFC	4.98787	32.6501	6.5459	2.42899	1.75853e-16	4.15881e-14	up
TRHDE-AS1	1.09889	18.7661	17.0773	3.20149	1.91162e-16	4.45975e-14	up
OXTR	25.3446	131.308	5.18089	2.1813	1.90282e-16	4.45975e-14	up
MAOB	4.67143	65.7327	14.0712	3.08117	1.96911e-16	4.56305e-14	up
VEPH1	30.5261	191.049	6.25855	2.38357	1.99896e-16	4.60133e-14	up
ARHGAP6	91.5438	433.704	4.73767	2.08137	2.01741e-16	4.61242e-14	up
MT-ATP8	1741.05	12264.1	7.0441	2.5047	2.13095e-16	4.80897e-14	up
ZNF185	917.262	4312.54	4.70153	2.073	2.21902e-16	4.97521e-14	up
RSU1	1196.79	3925.82	3.2803	1.63952	2.47368e-16	5.5104e-14	up
CTDSPL	241.795	1323.01	5.47164	2.24055	2.91704e-16	6.37465e-14	up
PDGFC	66.7327	174.694	2.61782	1.34481	3.04277e-16	6.56629e-14	up
LTBP1	145.926	860.111	5.89416	2.31781	3.99403e-16	8.4089e-14	up
ODC1	1242.88	3433.23	2.76232	1.41796	5.02751e-16	1.02716e-13	up
PF4	3179.73	16705.6	5.25378	2.19323	5.08137e-16	1.03206e-13	up
ARPC3P1	6.62917	21.4919	3.24202	1.62894	5.43289e-16	1.097e-13	up
MYL9	984.557	8718.21	8.85496	2.70802	5.99084e-16	1.20263e-13	up
MCUR1	328.437	1052.89	3.20576	1.60809	6.79141e-16	1.35546e-13	up
MT-ND4L	12202.8	61643.7	5.05161	2.14809	7.26583e-16	1.44181e-13	up
OPA1	715.732	1748.23	2.44258	1.25487	8.24312e-16	1.61715e-13	up
LANCL3	32.1415	114.912	3.57518	1.74016	8.64761e-16	1.68692e-13	up
FNBP1L	25.6847	105.803	4.11931	1.90938	8.79123e-16	1.69577e-13	up
SH3BGRL	1981.97	4177.37	2.10768	1.05605	8.7686e-16	1.69577e-13	up
CXCR2P1	535.258	2316.71	4.32821	1.97174	8.88461e-16	1.70427e-13	up
TMEM158	97.6704	649.137	6.6462	2.43433	9.86391e-16	1.87132e-13	up
HRASLS	20.9358	168.454	8.0462	2.61526	1.03716e-15	1.94625e-13	up
LIMS1	1508.24	4590.63	3.0437	1.54181	1.07076e-15	1.98769e-13	up
TRIM58	274.594	1587.6	5.78162	2.29094	1.08862e-15	2.01004e-13	up
GPX1P1	197.163	833.67	4.22832	1.94345	1.18602e-15	2.17824e-13	up
LRP12	31.3576	84.9347	2.70858	1.3829	1.21286e-15	2.21574e-13	up
CLU	2822.46	18282.3	6.47744	2.40698	1.22317e-15	2.22283e-13	up
ETFA	685.211	1833.44	2.67573	1.37495	1.29709e-15	2.34482e-13	up
MT-TS2	61.0134	398.215	6.52668	2.41345	1.3746e-15	2.4465e-13	up
MFSD2B	55.3918	378.119	6.82626	2.4557	1.63369e-15	2.89272e-13	up
CMTM5	282.816	1913.4	6.76552	2.44713	1.73511e-15	3.01054e-13	up
PTGS1	2147.71	11361.6	5.29011	2.19308	1.88242e-15	3.23365e-13	up
SIAE	180.504	615.836	3.41176	1.68288	2.05029e-15	3.47321e-13	up
PTPN12	1772.11	5216.2	2.9435	1.49788	2.04697e-15	3.47321e-13	up
ST7	87.914	240.138	2.73151	1.39902	2.0828e-15	3.50805e-13	up
WASF1	39.1712	113.297	2.89234	1.4698	2.54678e-15	4.20743e-13	up
TDRP	46.802	229.741	4.90879	2.10855	2.58858e-15	4.25612e-13	up
SUCNR1	8.07367	45.1532	5.59265	2.24271	2.65024e-15	4.33685e-13	up
MSANTD3	134.378	415.574	3.09259	1.5588	3.36976e-15	5.38662e-13	up
STXBP5-AS1	37.4344	110.094	2.94098	1.49221	3.47243e-15	5.52517e-13	up
KIF2A	729.139	1860.62	2.5518	1.3112	3.54954e-15	5.6125e-13	up
RGS18	1703.64	6731.38	3.95119	1.85956	3.58554e-15	5.62734e-13	up
MED12L	37.1186	128.743	3.46843	1.69864	4.04156e-15	6.25771e-13	up
CD226	889.202	2176.06	2.4472	1.25577	4.28429e-15	6.57458e-13	up
HIST1H2BJ	172.251	875.065	5.08018	2.14363	4.73765e-15	7.23812e-13	up
CDC14B	225.051	992.511	4.41017	1.98507	5.43299e-15	8.22765e-13	up
TRAPPC3L	20.1448	100.219	4.9749	2.11697	5.5832e-15	8.4182e-13	up
ADAM9	254.244	632.008	2.48583	1.27564	5.68951e-15	8.5412e-13	up
ITGB1	3324.49	8323.47	2.50368	1.28588	5.74436e-15	8.5862e-13	up
FAM20A	26.8596	211.195	7.8629	2.57467	6.56754e-15	9.69077e-13	up
CAV2	16.3741	106.774	6.52089	2.39855	6.79025e-15	9.97676e-13	up
TRBV7-5	4.66887	30.2606	6.48136	2.38133	6.89511e-15	1.00879e-12	up
GCKR	0.475329	11.5784	24.3588	3.26249	7.53982e-15	1.09846e-12	up
MYLK	349.523	1620.45	4.63616	2.03998	7.7526e-15	1.12471e-12	up
STOM	1395.77	2966.86	2.1256	1.06606	8.46326e-15	1.22268e-12	up
IGF2BP3	12.0118	47.5437	3.95809	1.84877	8.76487e-15	1.26097e-12	up
TPM4	3142.39	9519.29	3.02932	1.53132	1.02411e-14	1.46117e-12	up
HIST1H2AC	2253.92	9508.09	4.21847	1.93162	1.04225e-14	1.48093e-12	up
WASF3	14.8968	96.8816	6.50351	2.38918	1.11359e-14	1.57583e-12	up
BEST3	1.29957	14.5838	11.222	2.83303	1.12421e-14	1.58436e-12	up
RAB27B	196.906	675.59	3.43102	1.6851	1.16232e-14	1.63141e-12	up
ITGB5	448.23	2425.95	5.41229	2.20514	1.22579e-14	1.70662e-12	up
BMP6	180.76	795.876	4.40294	1.97911	1.28809e-14	1.77901e-12	up
SAMD14	71.6831	581.902	8.1177	2.59443	1.31207e-14	1.80491e-12	up
SLC8A3	16.6102	85.5011	5.1475	2.14765	1.33105e-14	1.82375e-12	up
STRIP2	19.2672	59.0618	3.0654	1.53716	1.35559e-14	1.85003e-12	up
P2RY12	53.0469	241.477	4.55215	2.01448	1.53553e-14	2.07917e-12	up
MT-TC	1180.54	6148.86	5.20853	2.1618	1.83368e-14	2.45401e-12	up
MGLL	365.518	2050.46	5.60974	2.23932	1.84243e-14	2.45619e-12	up
RYR2	9.57858	73.9701	7.72245	2.54402	1.88209e-14	2.49942e-12	up
HIST1H2AG	116.47	555.134	4.76634	2.06541	1.94606e-14	2.56465e-12	up
CDH6	0.180826	8.62618	47.7044	3.40968	1.97172e-14	2.58858e-12	up
PLXNB3	22.0759	171.48	7.76773	2.54885	1.99862e-14	2.61395e-12	up
CAVIN2	2725.69	14005.3	5.13827	2.14674	2.01273e-14	2.62247e-12	up
SH3TC2	31.8546	169.791	5.33019	2.18358	2.05739e-14	2.67058e-12	up
COL10A1	5.46629	32.1704	5.88524	2.27545	2.14284e-14	2.77108e-12	up
MT-TR	155.001	880.967	5.68362	2.25155	2.17118e-14	2.79726e-12	up
MT-TD	43.0694	251.814	5.8467	2.2777	2.96539e-14	3.72324e-12	up
RGS10	1207.53	4030.06	3.33744	1.64917	3.02289e-14	3.78168e-12	up
MT-RNR2	259574	1.29399e+06	4.98504	2.11162	3.04838e-14	3.7998e-12	up
RDH11	506.833	1035.12	2.04233	1.01024	3.19902e-14	3.95899e-12	up
FAM81B	6.06846	33.3983	5.50359	2.20678	3.22023e-14	3.971e-12	up
WHAMMP3	218.887	691.885	3.16093	1.58108	3.40589e-14	4.17016e-12	up
MT-ND5	45076.9	186717	4.14219	1.90458	3.91529e-14	4.74341e-12	up
HOMER2	86.7779	341.426	3.93448	1.84346	4.20108e-14	5.05418e-12	up
MEIS1	94.6679	376.145	3.97331	1.85531	4.50604e-14	5.38354e-12	up
MTHFD2L	124.772	276.153	2.21325	1.11667	4.59677e-14	5.473e-12	up
RGS6	74.1285	358.075	4.83046	2.07434	4.67148e-14	5.54285e-12	up
IGFBP2	27.4197	326.643	11.9127	2.87076	4.70708e-14	5.56596e-12	up
ITGA9-AS1	20.3461	99.8388	4.90702	2.08933	5.07503e-14	5.91995e-12	up
ABCC3	608.049	2757.21	4.53453	2.00507	5.11608e-14	5.94775e-12	up
OSBP2	144.871	1249.74	8.62652	2.62698	5.38965e-14	6.22387e-12	up
MT1E	35.1469	1095.07	31.1569	3.3169	5.54944e-14	6.38703e-12	up
MT-CO1	176322	631853	3.58353	1.73323	5.921e-14	6.72501e-12	up
CADM2	4.85519	42.3301	8.71853	2.63022	5.94195e-14	6.72667e-12	up
VIL1	71.9005	393.884	5.47817	2.20508	5.99602e-14	6.7657e-12	up
MYO3B	8.73926	41.3933	4.73648	2.04027	6.46122e-14	7.24327e-12	up
ABCC4	176.383	643.233	3.64679	1.75304	6.97937e-14	7.77366e-12	up
MPIG6B	1032.02	5772.16	5.59308	2.22549	7.23758e-14	8.03535e-12	up
TPM1	218.679	956.024	4.37182	1.96203	7.35017e-14	8.13419e-12	up
TRBV7-4	14.5484	75.4385	5.18536	2.14369	7.97521e-14	8.76968e-12	up
GRAP2	2438.45	8737.07	3.58305	1.73159	8.81559e-14	9.60204e-12	up
IGF2BP2	130.961	357.458	2.72951	1.3911	1.61212e-13	1.718e-11	up
DMTN	891.837	4396.65	4.92988	2.08835	1.62038e-13	1.72149e-11	up
MCPH1-AS1	24.3613	86.0291	3.53139	1.70712	1.72636e-13	1.82846e-11	up
SSX2IP	200.735	478.659	2.38453	1.21566	1.75518e-13	1.84216e-11	up
MT-RNR1	106269	554334	5.21634	2.14631	1.89976e-13	1.96981e-11	up
ASS1P1	7.58488	31.9032	4.20616	1.90217	1.99489e-13	2.03786e-11	up
MSRB3	67.1562	292.682	4.35823	1.95133	2.32254e-13	2.33118e-11	up
NCBP2L	4.0909	22.9972	5.62155	2.21383	2.40584e-13	2.40779e-11	up
TUBB1	2056.31	10469.6	5.09144	2.11909	2.476e-13	2.46372e-11	up
VCL	2348.33	7127.06	3.03495	1.52591	2.57913e-13	2.54435e-11	up
NT5M	235.081	1246.19	5.30111	2.16025	2.62505e-13	2.57494e-11	up
SLC6A4	21.0312	89.0505	4.2342	1.91521	2.62494e-13	2.57494e-11	up
EIF2AK1	1798.72	4628.77	2.57337	1.31626	2.70798e-13	2.64875e-11	up
MRPL37P1	0.612975	7.45728	12.1657	2.81698	2.81655e-13	2.74717e-11	up
C1orf198	133.601	529.532	3.96353	1.84392	2.87152e-13	2.79289e-11	up
HIST1H2BK	346.003	1363.92	3.94192	1.83779	3.04801e-13	2.93971e-11	up
HBD	12.7419	268.196	21.0483	3.11764	3.37856e-13	3.23144e-11	up
STON2	71.2691	248.548	3.48746	1.69317	3.40272e-13	3.24556e-11	up
SLC24A3	52.24	274.766	5.25969	2.14906	3.42932e-13	3.25296e-11	up
AFAP1	104.118	274.382	2.6353	1.3442	3.57472e-13	3.38159e-11	up
DAB2	271.432	741.385	2.73138	1.39162	3.92272e-13	3.69057e-11	up
MFSD1	1556.43	3163.8	2.03273	1.00254	4.40151e-13	4.05268e-11	up
DNM3	88.3003	305.77	3.46284	1.68331	4.71008e-13	4.30237e-11	up
METTL21EP	9.52571	56.7517	5.95774	2.26452	5.22163e-13	4.7197e-11	up
NT5C3A	890.022	2474.65	2.78043	1.41388	5.91953e-13	5.30882e-11	up
PRR16	4.881	28.4806	5.83499	2.24007	6.00918e-13	5.36137e-11	up
ANK1	156.231	647.203	4.14259	1.89021	5.99449e-13	5.36137e-11	up
PEAR1	244.74	1116.18	4.56069	1.9955	6.38623e-13	5.63948e-11	up
MT-TL1	169.482	940.55	5.54954	2.1973	7.03352e-13	6.16379e-11	up
EGFL7	75.4966	406.68	5.38673	2.16811	7.02146e-13	6.16379e-11	up
MTATP6P1	2948.45	19873.1	6.74017	2.38017	7.28032e-13	6.34785e-11	up
CXCL5	324.722	1780.26	5.48242	2.18464	7.66119e-13	6.66311e-11	up
PARPBP	14.8701	30.6141	2.05877	1.02128	7.92819e-13	6.878e-11	up
GPRIN3	987.988	2484.72	2.51493	1.28469	8.07657e-13	6.97424e-11	up
HIST1H2BG	77.1034	328.711	4.26326	1.92037	8.10441e-13	6.97828e-11	up
ARG2	17.2272	57.1561	3.31779	1.62761	8.58603e-13	7.37458e-11	up
TSC22D1	862.31	2644.72	3.06702	1.53539	8.72364e-13	7.47419e-11	up
ARMC3	12.9665	65.6158	5.06042	2.09901	9.09327e-13	7.73331e-11	up
KIAA1211	8.07851	48.5876	6.01443	2.26414	9.72404e-13	8.14931e-11	up
MAST4-AS1	10.6211	51.561	4.8546	2.05347	9.86215e-13	8.24504e-11	up
HIST2H2BE	1014.2	4149.32	4.09124	1.87376	9.91598e-13	8.25009e-11	up
GP9	405.803	2374.84	5.85221	2.2455	1.01456e-12	8.40067e-11	up
MTRNR2L12	4.24204	31.3579	7.39218	2.45434	1.0236e-12	8.43507e-11	up
GP6	97.0324	455.389	4.69317	2.02177	1.0997e-12	8.97648e-11	up
LHFPL6	4.11166	29.2431	7.11225	2.4095	1.10633e-12	9.00927e-11	up
TRPC6	6.01956	26.8825	4.46586	1.96143	1.11262e-12	9.03917e-11	up
ATAD2	179.945	375.752	2.08815	1.03811	1.27313e-12	1.01756e-10	up
BEX3	365.909	1529.41	4.17975	1.89565	1.37029e-12	1.09269e-10	up
PARD3	38.2041	166.445	4.35671	1.93889	1.49352e-12	1.18276e-10	up
LYPLAL1-DT	11.7057	50.6397	4.32606	1.92603	1.51503e-12	1.19705e-10	up
HBB	3149.14	114606	36.3928	3.21811	1.53542e-12	1.21039e-10	up
TSPAN9	198.923	1035.87	5.20737	2.12457	1.95099e-12	1.5104e-10	up
F2RL3	36.2401	159.712	4.40706	1.94984	2.03007e-12	1.56112e-10	up
MFAP3L	190.243	783.377	4.11777	1.87633	2.06346e-12	1.57976e-10	up
HIST1H2BN	37.5024	144.211	3.84539	1.79838	2.08716e-12	1.59437e-10	up
SNX24	53.1202	111.169	2.09278	1.03386	2.13962e-12	1.62906e-10	up
CETP	43.4367	159.274	3.66681	1.74329	2.14687e-12	1.62917e-10	up
CALHM5	7.56793	40.7165	5.38013	2.15061	2.15454e-12	1.63141e-10	up
MEIS3P2	1.92715	17.121	8.88411	2.57255	2.16028e-12	1.63217e-10	up
AQP10	70.6151	483.928	6.85304	2.37982	2.25434e-12	1.69581e-10	up
GMPR	253.625	1221.39	4.81573	2.04348	2.33374e-12	1.75173e-10	up
TM4SF1	1.94338	17.461	8.98487	2.5887	2.39515e-12	1.79004e-10	up
GRHL1	33.4942	123.193	3.67804	1.74476	2.47735e-12	1.84747e-10	up
SDC4	43.8557	120.223	2.74133	1.39062	2.71137e-12	2.00897e-10	up
FGF2	4.20986	22.4507	5.33289	2.13286	2.86216e-12	2.10714e-10	up
ASXL3	2.08842	16.4516	7.87753	2.48057	2.93579e-12	2.15675e-10	up
MT-TP	350.315	1670.18	4.76765	2.03003	3.32396e-12	2.43156e-10	up
ESAM	370.587	1650.5	4.45375	1.95829	3.44613e-12	2.49974e-10	up
MITF	58.9748	122.913	2.08415	1.02842	3.67709e-12	2.65058e-10	up
LIPH	11.5081	53.5043	4.64928	1.9985	3.69796e-12	2.65529e-10	up
CTTN	594.23	2729.38	4.59314	1.98977	4.01153e-12	2.86178e-10	up
LMNA	678.248	1972.85	2.90874	1.46545	4.06885e-12	2.89669e-10	up
ZNF385D	23.0664	116.685	5.05867	2.08662	4.26612e-12	3.01846e-10	up
TGFB1I1	48.816	253.049	5.18372	2.11144	4.59643e-12	3.21266e-10	up
TMEM40	256.8	1153.99	4.49373	1.96514	4.92831e-12	3.43074e-10	up
IPO11	81.3158	183.775	2.26002	1.13888	5.65243e-12	3.91117e-10	up
DNAJC6	9.44482	26.9959	2.85828	1.42128	5.97669e-12	4.10265e-10	up
SCFD2	156.425	419.257	2.68025	1.36072	6.81257e-12	4.63954e-10	up
EFHC2	59.1586	175.674	2.96954	1.48664	7.2416e-12	4.89311e-10	up
TRPC2	22.902	98.8792	4.31749	1.91567	8.92739e-12	5.96219e-10	up
PRUNE2	28.5612	61.0122	2.13619	1.06661	9.07519e-12	6.04919e-10	up
CA1	5.84961	344.32	58.862	3.19604	9.67788e-12	6.37706e-10	up
GNAS	10438.6	25192.7	2.41343	1.2269	1.0263e-11	6.72409e-10	up
MSC-AS1	16.2761	41.8779	2.57297	1.29739	1.03273e-11	6.75346e-10	up
ZNF484	60.6822	152.119	2.50681	1.27463	1.15651e-11	7.52017e-10	up
ACRBP	1023.26	4075.25	3.9826	1.82859	1.21862e-11	7.89425e-10	up
HRAT92	155.07	664.058	4.28232	1.90686	1.25813e-11	8.13496e-10	up
MLH3	575.459	1626.53	2.82649	1.4264	1.3086e-11	8.36727e-10	up
MAP2	6.38136	26.238	4.11166	1.8493	1.33555e-11	8.52381e-10	up
ENKUR	186.655	727.524	3.8977	1.80389	1.33822e-11	8.52508e-10	up
LY6G6E	38.3965	176.285	4.59118	1.97764	1.34864e-11	8.5599e-10	up
TNFSF4	121.635	436.2	3.58613	1.70955	1.37772e-11	8.69653e-10	up
NAP1L1	5854.51	12221.9	2.08761	1.0355	1.38756e-11	8.74262e-10	up
PTGES3L	3.16633	19.6639	6.2103	2.25453	1.43072e-11	8.96549e-10	up
FTH1P2	51.5306	156.75	3.04189	1.51607	1.57369e-11	9.77273e-10	up
HIST1H4I	169.801	591.496	3.48346	1.67542	1.82805e-11	1.12112e-09	up
ALAS2	38.8556	2651.77	68.2468	3.17165	1.93743e-11	1.17981e-09	up
PNMA1	648.386	1598.13	2.46478	1.25222	2.22732e-11	1.34449e-09	up
NEXN	98.9327	351.08	3.54868	1.69395	2.52265e-11	1.51219e-09	up
MT-CO3	70009.4	232285	3.31791	1.61716	2.62562e-11	1.57049e-09	up
APP	1893.54	4589.28	2.42365	1.23039	2.69015e-11	1.59872e-09	up
MYCT1	14.0902	59.2399	4.20435	1.87784	2.73028e-11	1.617e-09	up
SYTL4	15.7279	68.1586	4.3336	1.90807	2.78625e-11	1.64451e-09	up
SPTB	87.035	433.351	4.97905	2.05319	2.96049e-11	1.73548e-09	up
ILDR2	6.33243	23.209	3.66511	1.72186	2.95676e-11	1.73548e-09	up
SPOCD1	143.713	738.189	5.13656	2.08345	3.06864e-11	1.78675e-09	up
PDE3A	10.5419	46.4973	4.41073	1.92214	3.08901e-11	1.79558e-09	up
ZC3HAV1L	32.9636	103.49	3.13954	1.54939	3.18718e-11	1.84025e-09	up
MPP1	1365.67	3375.54	2.47171	1.25526	3.25945e-11	1.8757e-09	up
GGTA1P	341.991	1105.48	3.23249	1.58502	3.40107e-11	1.9507e-09	up
TTLL7	17.4165	62.5934	3.59391	1.70061	3.48468e-11	1.99534e-09	up
TIMP1	1490.32	4271.35	2.86606	1.44061	3.54027e-11	2.01148e-09	up
SVIP	441.209	1060.44	2.4035	1.21868	3.542e-11	2.01148e-09	up
MT-TA	46.2171	199.85	4.32415	1.90851	3.7827e-11	2.13065e-09	up
PDLIM1	806.504	2720.87	3.37366	1.63458	3.87953e-11	2.17809e-09	up
TGFB2	1.93031	11.3376	5.87347	2.18653	4.07872e-11	2.27512e-09	up
MT-TN	1709.82	7185.71	4.20261	1.87778	4.10275e-11	2.2829e-09	up
MAP1A	155.723	654.434	4.20255	1.87741	4.10589e-11	2.2829e-09	up
SEC14L5	73.277	353.779	4.82796	2.019	4.20569e-11	2.33463e-09	up
THRB	37.4381	147.003	3.92656	1.80315	4.26422e-11	2.36332e-09	up
NAT8B	35.2669	166.446	4.7196	1.99585	4.34293e-11	2.40309e-09	up
LAPTM4B	50.6614	161.615	3.19011	1.56708	4.37428e-11	2.41646e-09	up
CENPU	30.7929	71.7955	2.33156	1.18236	4.48677e-11	2.46295e-09	up
MT-TV	244.369	1227.29	5.02227	2.05657	4.81485e-11	2.62634e-09	up
TUBA8	13.0054	45.1989	3.47539	1.66157	4.92132e-11	2.68018e-09	up
GFI1B	473.597	1978.82	4.17827	1.86977	5.15281e-11	2.79742e-09	up
TMEM45A	7.55937	32.4359	4.29082	1.89156	5.17919e-11	2.80733e-09	up
CNN1	10.3524	51.63	4.98724	2.04707	5.27822e-11	2.85206e-09	up
SMOX	701.058	2858.62	4.07758	1.84304	5.75101e-11	3.08355e-09	up
CD9	303.839	966.409	3.18066	1.56359	5.7513e-11	3.08355e-09	up
PGAP1	72.6518	179.003	2.46384	1.24874	5.88949e-11	3.14787e-09	up
CLEC2L	29.8129	143.709	4.82037	2.01395	5.98173e-11	3.1873e-09	up
ADIPOR1	1578.49	3853.34	2.44116	1.23784	6.40389e-11	3.38094e-09	up
CFAP161	35.7864	175.273	4.89774	2.02811	6.43511e-11	3.38707e-09	up
ZNF271P	326.849	675.528	2.06679	1.01936	6.641e-11	3.46899e-09	up
PTCRA	331.508	1478.59	4.4602	1.93439	7.42954e-11	3.86336e-09	up
VWF	153.35	747.573	4.87494	2.02252	7.6698e-11	3.97632e-09	up
OR7E94P	31.6265	132.274	4.18237	1.86618	7.91987e-11	4.09367e-09	up
EHD3	382.331	1329.11	3.47634	1.66463	8.35885e-11	4.28211e-09	up
BBOF1	22.5165	70.0887	3.11278	1.53025	8.42623e-11	4.30534e-09	up
TEX9	16.9125	44.5904	2.63654	1.32815	8.42913e-11	4.30534e-09	up
CRYM	11.0848	52.1565	4.70522	1.98507	8.87783e-11	4.51449e-09	up
LRRC32	13.4793	44.2775	3.28486	1.59336	9.06363e-11	4.60219e-09	up
NFIB	1.11092	10.7218	9.6513	2.54814	9.3989e-11	4.75843e-09	up
VSIG2	405.056	1684.92	4.15972	1.8598	9.75715e-11	4.92536e-09	up
MT-TG	114.803	482.149	4.1998	1.86957	9.77393e-11	4.92663e-09	up
CD109	27.3338	89.3772	3.26984	1.59056	9.98968e-11	5.02804e-09	up
PDE2A	28.0816	123.417	4.39495	1.91493	1.08654e-10	5.41359e-09	up
HBA1	370.201	15738.6	42.5136	3.02328	1.16212e-10	5.7735e-09	up
PTPRN	16.4476	100.264	6.09595	2.22019	1.19677e-10	5.9371e-09	up
C12orf76	276.931	667.569	2.41059	1.21969	1.21948e-10	6.04108e-09	up
PDE4D	400.259	1119.84	2.79778	1.40678	1.2238e-10	6.05378e-09	up
PBX1	76.5036	275.107	3.596	1.69955	1.25717e-10	6.20108e-09	up
AIG1	159.654	397.976	2.49275	1.26188	1.37824e-10	6.73096e-09	up
GPX1	8932.61	28623.1	3.20434	1.56837	1.40422e-10	6.84815e-09	up
HTR2A	2.14	14.8294	6.92964	2.31111	1.41933e-10	6.90236e-09	up
MS4A4A	68.2724	195.636	2.86552	1.43581	1.43907e-10	6.98851e-09	up
SLFN14	18.738	46.0008	2.45495	1.2334	1.47498e-10	7.14281e-09	up
RIPOR3	40.8281	103.67	2.53917	1.28242	1.51323e-10	7.31777e-09	up
OSBPL6	2.33145	11.294	4.8442	2.00589	1.60482e-10	7.72821e-09	up
CCR4	140.561	300.294	2.13639	1.06293	1.6328e-10	7.84107e-09	up
YOD1	322.121	706.568	2.19349	1.0975	1.71942e-10	8.20004e-09	up
NDUFV2	59.1302	166.209	2.81089	1.41072	1.79496e-10	8.52494e-09	up
HIST1H2BH	75.8451	308.152	4.06291	1.82891	1.9018e-10	9.00758e-09	up
INAFM2	634.549	1405.88	2.21557	1.10986	2.15662e-10	1.00929e-08	up
CTSA	3288.56	9044.7	2.75035	1.38385	2.2117e-10	1.02952e-08	up
OR2W3	20.8172	103.477	4.97072	2.02656	2.30186e-10	1.06826e-08	up
TCEAL9	16.0994	53.5127	3.3239	1.60457	2.31586e-10	1.07332e-08	up
MT-ND2	70093.9	258568	3.68887	1.7242	2.40378e-10	1.11108e-08	up
ANKRD9	205.399	837.746	4.07863	1.83127	2.4335e-10	1.12181e-08	up
KCND3	22.472	75.8279	3.37432	1.62079	2.48453e-10	1.14077e-08	up
STMP1	822.864	1799.17	2.18648	1.09226	2.9052e-10	1.31469e-08	up
OST4	2494.31	6771.48	2.71477	1.36651	3.28666e-10	1.47115e-08	up
MT-CO2	70444.9	213894	3.03633	1.50082	3.51578e-10	1.56032e-08	up
CAPN11	3.29394	31.0591	9.42914	2.50296	3.54653e-10	1.57195e-08	up
PARVB	506.727	1570.02	3.09836	1.524	3.79326e-10	1.677e-08	up
HBQ1	24.2682	142.335	5.86508	2.16897	3.81775e-10	1.68567e-08	up
GATA1	57.6346	251.449	4.36281	1.89559	3.83648e-10	1.69178e-08	up
C9orf3	61.7359	133.561	2.16342	1.07461	4.15813e-10	1.81589e-08	up
SHROOM4	6.63663	28.2693	4.25959	1.85881	4.28477e-10	1.86328e-08	up
TOM1L1	8.16571	23.8207	2.91716	1.42892	4.4622e-10	1.93314e-08	up
MTND4P12	10.3702	67.5117	6.51018	2.24921	4.58538e-10	1.98153e-08	up
OPHN1	18.7932	43.2649	2.30217	1.1437	4.79102e-10	2.05241e-08	up
FAM198A	15.8212	63.867	4.03681	1.81295	4.81991e-10	2.05459e-08	up
HIST1H2AI	8.60685	37.5402	4.36166	1.886	4.85262e-10	2.06441e-08	up
DYTN	12.8454	47.9592	3.73358	1.72645	4.98311e-10	2.11372e-08	up
CA2	420.983	1488.52	3.53582	1.67229	5.01621e-10	2.12515e-08	up
PRDX6	1423.37	3250.61	2.28374	1.14778	5.12662e-10	2.16927e-08	up
F2R	542.338	1128.37	2.08056	1.02592	5.16193e-10	2.18153e-08	up
NKAIN2	1.77962	10.6249	5.97031	2.15648	5.22377e-10	2.19691e-08	up
NCK2	1499.2	3401.35	2.26878	1.13916	5.3722e-10	2.25385e-08	up
BCAM	0.416441	12.2163	29.335	2.8712	5.40162e-10	2.26344e-08	up
PDGFRA	4.38101	19.5659	4.46606	1.90955	5.53124e-10	2.31494e-08	up
WFDC1	1.02812	35.7526	34.7746	2.90088	5.7659e-10	2.41023e-08	up
AREG	14.0845	126.93	9.01209	2.46804	5.91198e-10	2.46532e-08	up
CA3-AS1	6.41961	23.342	3.63605	1.68597	6.02761e-10	2.50749e-08	up
HPGD	112.386	236.476	2.10414	1.03883	6.14667e-10	2.55394e-08	up
RBM44	46.2947	104.587	2.25916	1.13285	6.21971e-10	2.58118e-08	up
WDR11-AS1	76.3768	279.617	3.66102	1.70812	6.27106e-10	2.59937e-08	up
GNAZ	311.857	1227.05	3.93466	1.78519	6.39484e-10	2.64432e-08	up
DNAH2	5.40698	28.6768	5.30367	2.06943	6.86284e-10	2.81425e-08	up
DUSP4	28.5854	86.1388	3.01338	1.4891	6.9939e-10	2.8646e-08	up
CAMTA1	306.494	628.351	2.05013	1.00584	7.09042e-10	2.89041e-08	up
JAM3	179.359	633.232	3.53053	1.66758	7.31164e-10	2.97357e-08	up
TAL1	180.867	659.955	3.64883	1.70356	7.41601e-10	3.0054e-08	up
MT-CYB	55419.6	170272	3.07241	1.51058	7.89558e-10	3.18852e-08	up
PTPRF	23.4967	104.837	4.46177	1.90757	8.18153e-10	3.30014e-08	up
NRGN	14183.5	57182.2	4.03159	1.80752	8.85814e-10	3.55231e-08	up
SLC4A1	18.4915	461.201	24.9412	2.82791	8.9558e-10	3.58731e-08	up
DYNC1I1	2.68191	16.586	6.18442	2.18884	9.12426e-10	3.6379e-08	up
RUFY1	1234.58	3310.04	2.68111	1.34714	1.00939e-09	4.00234e-08	up
SLC40A1	620.379	1602.89	2.58373	1.30161	1.00963e-09	4.00234e-08	up
HIST1H3H	660.106	2509.64	3.80187	1.745	1.03824e-09	4.10919e-08	up
KIFC3	332.52	883.837	2.658	1.3359	1.08584e-09	4.27502e-08	up
SERPINE1	17.8518	62.5602	3.50442	1.65316	1.09718e-09	4.30984e-08	up
RRM2P3	13.7113	42.2541	3.08169	1.50141	1.16709e-09	4.54821e-08	up
MT-ND1	75778.9	272483	3.59577	1.68405	1.24067e-09	4.81324e-08	up
PTP4A2P2	41.266	147.963	3.58559	1.68073	1.24237e-09	4.81444e-08	up
CHRNA2	10.7962	49.0756	4.54565	1.92138	1.27152e-09	4.91086e-08	up
GNG4	1.12453	6.58045	5.85175	2.15658	1.27423e-09	4.91582e-08	up
TSPAN33	754.117	2365.4	3.13666	1.53163	1.2948e-09	4.97848e-08	up
ANKRD33B	108.905	273.646	2.51271	1.26444	1.4028e-09	5.35204e-08	up
FHL2	46.9612	135.127	2.87742	1.42957	1.44046e-09	5.46552e-08	up
CDR2L	11.1178	48.9002	4.39838	1.88614	1.45552e-09	5.5166e-08	up
MTND2P28	2850.77	11078.8	3.88626	1.76465	1.48915e-09	5.61325e-08	up
HIST1H2BO	21.653	121.28	5.60104	2.10681	1.49303e-09	5.62175e-08	up
SLA2	847.946	2124.44	2.5054	1.26184	1.66594e-09	6.23204e-08	up
COL6A3	44.1317	192.426	4.36027	1.87729	1.69706e-09	6.32789e-08	up
YWHAH	1027.94	2322.53	2.25941	1.13094	1.99899e-09	7.31157e-08	up
SAMSN1	393.878	884.872	2.24656	1.12376	2.01071e-09	7.33887e-08	up
RAB13	25.8955	64.3414	2.48465	1.24698	2.37352e-09	8.55457e-08	up
IL21-AS1	1.38317	7.1409	5.16272	2.02243	2.40912e-09	8.67384e-08	up
IL10	2.83358	18.2833	6.45237	2.20675	2.44582e-09	8.79581e-08	up
PROSER2	56.8293	154.063	2.71098	1.35412	2.56862e-09	9.1811e-08	up
PRUNE1	429.346	1004.78	2.34026	1.17462	2.71713e-09	9.64204e-08	up
GLYATL1P1	6.65874	22.8629	3.43352	1.61758	2.79282e-09	9.90046e-08	up
RNF208	66.1701	284.02	4.29228	1.85746	2.80428e-09	9.91054e-08	up
CHD1	1087.04	2234.68	2.05575	1.00775	2.98841e-09	1.05075e-07	up
ATP9A	131.312	330.442	2.51647	1.26422	3.06495e-09	1.07329e-07	up
HBA2	2749.54	56465.8	20.5365	2.72168	3.08193e-09	1.07627e-07	up
NR4A3	10.5681	45.9688	4.34979	1.86888	3.10828e-09	1.08407e-07	up
HEMGN	80.9811	300.973	3.71658	1.70999	3.25864e-09	1.12402e-07	up
AQP1	5.0178	22.4714	4.47834	1.88446	3.34963e-09	1.14738e-07	up
BTG3	93.1026	235.345	2.5278	1.27119	3.40159e-09	1.16287e-07	up
FTH1P23	13.7734	42.3737	3.07649	1.50352	3.44479e-09	1.17548e-07	up
RN7SL834P	26.9092	70.6929	2.62709	1.31649	3.52068e-09	1.19648e-07	up
PDGFA	18.9953	62.5353	3.29215	1.57604	4.01368e-09	1.34027e-07	up
GPR1	2.04504	11.7002	5.72123	2.08926	4.32505e-09	1.43454e-07	up
ACSBG1	21.6765	72.4994	3.34461	1.59082	4.54654e-09	1.50079e-07	up
AHSP	2.8601	91.4968	31.9907	2.76799	4.64572e-09	1.52915e-07	up
CMBL	5.45014	22.7022	4.16542	1.81152	4.87653e-09	1.5975e-07	up
CRAT	441.659	1111.86	2.51745	1.26388	4.86867e-09	1.5975e-07	up
TMSB15A	1.35059	8.36383	6.19271	2.14239	5.03712e-09	1.64232e-07	up
ACCSL	0.676704	9.55971	14.1269	2.57558	5.11351e-09	1.66565e-07	up
CDK2AP1	217.002	478.873	2.20677	1.09752	5.26664e-09	1.71069e-07	up
SLC35D3	8.02645	34.3577	4.28056	1.84207	5.57406e-09	1.80376e-07	up
SNN	2785.16	7261.63	2.60726	1.30638	5.691e-09	1.83301e-07	up
DUBR	13.6025	36.4698	2.68111	1.32702	5.73179e-09	1.84443e-07	up
LGALSL	177.219	610.237	3.4434	1.62439	5.99135e-09	1.91901e-07	up
MT-TQ	68.7414	358.917	5.22126	2.02169	6.75344e-09	2.1237e-07	up
CPNE4	1.30619	9.0774	6.9495	2.22503	6.80687e-09	2.13856e-07	up
THCAT158	8.62198	45.218	5.24451	2.02093	7.43776e-09	2.32619e-07	up
E2F1	172.896	640.508	3.70458	1.69902	7.79545e-09	2.42706e-07	up
PABPC1P3	12.2768	41.2144	3.35709	1.5939	7.81142e-09	2.42984e-07	up
CDKL1	33.0815	68.6737	2.07589	1.00863	7.86015e-09	2.4428e-07	up
MT-TS1	16.0124	69.8195	4.36033	1.85741	8.4809e-09	2.60988e-07	up
MYEOV	42.0578	145.661	3.46334	1.6257	9.02727e-09	2.76079e-07	up
CYB5R1	521.247	1069.95	2.05267	1.00329	9.28907e-09	2.83584e-07	up
GRB14	18.0843	87.4547	4.83594	1.9497	9.31371e-09	2.83844e-07	up
MT-ND4	101413	306571	3.02298	1.47701	9.96655e-09	3.02129e-07	up
ZMYND12	6.16705	20.796	3.37211	1.58764	1.029e-08	3.11115e-07	up
ATL1	28.8167	66.5648	2.30994	1.14572	1.06812e-08	3.21256e-07	up
CENPE	23.9582	53.4663	2.23165	1.11413	1.1221e-08	3.36026e-07	up
GP1BA	223.966	711.215	3.17555	1.53051	1.17026e-08	3.48334e-07	up
IFI27	30.8559	550.826	17.8516	2.61396	1.23666e-08	3.65889e-07	up
DDX18P1	4.85868	15.5969	3.21011	1.52923	1.24869e-08	3.69133e-07	up
PRKAR1B	429.625	1367.51	3.18304	1.53271	1.28707e-08	3.79182e-07	up
MT-TM	150.439	711.365	4.72859	1.92494	1.32464e-08	3.89253e-07	up
HIST1H1E	6.55723	52.2904	7.97447	2.30138	1.45843e-08	4.25669e-07	up
GAS2L3	13.3409	45.6298	3.42029	1.60682	1.60842e-08	4.63956e-07	up
MT-TH	166.053	651.289	3.92216	1.74819	1.61197e-08	4.64592e-07	up
ASPM	26.2575	62.4584	2.37869	1.19278	1.63861e-08	4.71483e-07	up
ACTR3B	129.354	290.99	2.24957	1.11839	1.68672e-08	4.81314e-07	up
TPTEP1	85.6567	265.342	3.09774	1.4998	1.72117e-08	4.89124e-07	up
STK19B	2.95425	14.0914	4.76987	1.93286	1.72692e-08	4.90355e-07	up
SPDYA	14.8256	30.5433	2.06018	1.00707	1.79334e-08	5.05473e-07	up
E2F6P4	1.32735	7.86959	5.9288	2.07144	1.83945e-08	5.14688e-07	up
SMIM5	162.023	544.932	3.3633	1.58907	1.91445e-08	5.34373e-07	up
PGAM1P8	62.5556	226.083	3.61411	1.66375	1.9173e-08	5.34739e-07	up
GAS2L1	882.622	2991.22	3.38901	1.59706	1.95284e-08	5.43333e-07	up
TENT5C	620.914	1311.11	2.11158	1.03903	1.9566e-08	5.43942e-07	up
ANKRD36	123.618	265.908	2.15104	1.06209	1.96677e-08	5.46329e-07	up
EHD2	11.2244	46.0338	4.10121	1.78321	1.98064e-08	5.48856e-07	up
TMOD1	12.6137	58.4972	4.63759	1.89552	2.11485e-08	5.8092e-07	up
TRIM40	4.22641	18.0988	4.28231	1.81776	2.18716e-08	5.97929e-07	up
HIF1A	1157.43	3142.3	2.71489	1.34827	2.19678e-08	5.99409e-07	up
HIST1H2BF	13.1543	41.5946	3.16205	1.51643	2.27732e-08	6.16717e-07	up
NDUFAF3	541.136	1262.9	2.33379	1.16478	2.36941e-08	6.39147e-07	up
GLYATL1P2	10.2527	37.2484	3.63303	1.66278	2.3836e-08	6.41972e-07	up
MATR3	55.598	132.607	2.3851	1.19156	2.44026e-08	6.5621e-07	up
HBBP1	0.0992627	3.72653	37.5421	2.63841	2.66931e-08	7.10061e-07	up
NEXN-AS1	7.03332	25.7129	3.65587	1.66536	2.69338e-08	7.15913e-07	up
WRB	111.775	240.07	2.14779	1.05871	2.73951e-08	7.26504e-07	up
CYP19A1	0.324027	3.97122	12.2558	2.44947	2.74767e-08	7.27245e-07	up
PDZD2	31.748	69.1312	2.1775	1.068	2.75367e-08	7.27245e-07	up
FAH	143.012	389.712	2.72504	1.35058	2.8287e-08	7.44864e-07	up
KLHL35	18.0358	59.9112	3.32179	1.56764	2.95915e-08	7.73456e-07	up
ENSAP2	16.848	37.4536	2.22303	1.10691	3.12761e-08	8.13792e-07	up
KIF3C	163.663	436.889	2.66943	1.32554	3.18545e-08	8.25467e-07	up
CDH20	4.76161	14.8659	3.12204	1.48275	3.3037e-08	8.51905e-07	up
CCDC173	1.41784	6.57274	4.63575	1.88994	3.39157e-08	8.73261e-07	up
CDC14C	3.35742	13.2146	3.93594	1.72146	3.42414e-08	8.80332e-07	up
INKA2-AS1	6.3845	24.3182	3.80895	1.70773	3.42383e-08	8.80332e-07	up
HIST1H4H	106.53	415.641	3.90162	1.73306	3.58073e-08	9.15819e-07	up
CFH	61.6971	135.344	2.19368	1.08436	3.75682e-08	9.56605e-07	up
CLDN5	214.126	824.818	3.85203	1.71949	3.9277e-08	9.97175e-07	up
YBX3	1367.59	2882.65	2.10783	1.03466	3.98415e-08	1.00928e-06	up
DNAH10OS	42.7144	96.8199	2.26668	1.12082	4.0671e-08	1.02728e-06	up
PVALB	36.8394	151.802	4.12064	1.78122	4.21163e-08	1.05913e-06	up
SH3D19	8.27459	23.526	2.84316	1.39665	4.23659e-08	1.06386e-06	up
MT1X	78.5343	645.101	8.21426	2.27758	4.34978e-08	1.08912e-06	up
IGFL2	0.652996	4.45386	6.82066	2.17774	4.41056e-08	1.10274e-06	up
UACA	49.5015	103.462	2.09008	1.02193	4.51419e-08	1.12701e-06	up
MT-TW	29.3754	133.819	4.55549	1.87068	4.60626e-08	1.14834e-06	up
CHMP4C	2.04431	9.64531	4.71812	1.88108	4.81822e-08	1.19257e-06	up
C1QC	16.7951	72.8259	4.33614	1.82727	4.9088e-08	1.21033e-06	up
MAPK10	10.3496	24.0798	2.32664	1.14202	5.14603e-08	1.26195e-06	up
MAP3K7CL	2537.27	8775.76	3.45875	1.6086	5.17539e-08	1.26825e-06	up
GNB5	411.236	848.738	2.06387	1.00631	5.46153e-08	1.3252e-06	up
MT-TI	91.1723	389.106	4.26781	1.81024	5.54958e-08	1.34373e-06	up
ACER2	14.9276	35.5857	2.38389	1.17474	5.65383e-08	1.3661e-06	up
IQUB	2.12418	7.40878	3.48783	1.57127	6.3838e-08	1.52119e-06	up
HIST1H2AE	78.5919	283.316	3.60491	1.64758	6.57502e-08	1.56244e-06	up
SLC35G1	39.6689	85.5502	2.1566	1.05686	6.84804e-08	1.62062e-06	up
ALOX12	316.408	868.079	2.74354	1.35322	7.08497e-08	1.67097e-06	up
SOCS3	1072.37	3675.24	3.4272	1.59569	7.15581e-08	1.68652e-06	up
EPB42	3.92788	56.9099	14.4887	2.45984	7.59562e-08	1.77925e-06	up
OR2B6	12	61.3138	5.10947	1.95337	8.52522e-08	1.97027e-06	up
SCN1B	221.416	828.058	3.73983	1.67966	9.07165e-08	2.08124e-06	up
LURAP1L	3.61073	13.1344	3.63761	1.63833	9.30356e-08	2.13019e-06	up
MAP1B	7.21597	25.6965	3.56106	1.62783	9.32197e-08	2.133e-06	up
SMIM1	16.5684	66.3785	4.00632	1.74217	1.05913e-07	2.37774e-06	up
AVPR1A	19.7674	56.2507	2.84563	1.38637	1.08396e-07	2.42716e-06	up
HGD	86.1999	265.473	3.07974	1.47841	1.1148e-07	2.48335e-06	up
ANKRD36C	57.6184	154.205	2.67631	1.32163	1.12802e-07	2.51118e-06	up
ST3GAL6-AS1	3.18282	12.7475	4.00509	1.72625	1.17898e-07	2.61787e-06	up
HIST1H3J	3.29839	13.0425	3.95421	1.71567	1.26866e-07	2.79543e-06	up
ADRA2A	21.2945	87.8724	4.12654	1.76388	1.31535e-07	2.88907e-06	up
TMCC2	123.766	379.997	3.07029	1.47292	1.38297e-07	3.01651e-06	up
HIST1H1B	1.42564	6.29802	4.41769	1.8235	1.40332e-07	3.05509e-06	up
SNORD11	2.81665	9.23593	3.27905	1.54373	1.45399e-07	3.15348e-06	up
BAMBI	11.2314	41.7532	3.71754	1.66656	1.46103e-07	3.16279e-06	up
IFIT1B	1.03729	19.494	18.7932	2.46649	1.48594e-07	3.20867e-06	up
EDA	22.167	48.247	2.17652	1.06741	1.49711e-07	3.22874e-06	up
CYP2F2P	8.65056	21.2769	2.4596	1.20303	1.50338e-07	3.23822e-06	up
MT-ND3	30080.1	81692.4	2.71583	1.33665	1.57278e-07	3.37717e-06	up
MPL	24.9463	71.4724	2.86505	1.39163	1.61403e-07	3.4593e-06	up
PHF2P2	5.40538	19.3812	3.58555	1.61897	1.71394e-07	3.65302e-06	up
LGALS12	175.963	487.489	2.7704	1.35806	1.73686e-07	3.69731e-06	up
DGKI	1.43194	7.23539	5.05285	1.91488	1.75351e-07	3.72814e-06	up
RADIL	5.27844	16.1042	3.05094	1.46286	1.91461e-07	4.03587e-06	up
DNM1	71.2893	186.055	2.60986	1.28812	1.94362e-07	4.08705e-06	up
RAMP3	7.35512	38.5046	5.23508	1.94936	1.95496e-07	4.10239e-06	up
WHAMMP2	234.125	580.602	2.47988	1.22865	2.0231e-07	4.22842e-06	up
HIST1H1T	2.00814	9.20936	4.58601	1.84208	2.03419e-07	4.24904e-06	up
ANKRD36B	77.5105	169.937	2.19244	1.07899	2.03722e-07	4.25279e-06	up
MIR34AHG	5.76668	13.7815	2.38986	1.18257	2.0454e-07	4.26728e-06	up
RNY3P8	1.34369	6.77317	5.04073	1.91169	2.18669e-07	4.52378e-06	up
TAGLN2P1	4.15137	11.9575	2.88037	1.39065	2.22442e-07	4.5881e-06	up
AFAP1-AS1	4.9966	17.9277	3.58799	1.61702	2.24466e-07	4.61605e-06	up
PLCH1	5.52367	22.5468	4.08186	1.73856	2.26711e-07	4.65668e-06	up
GPC5	0.865376	4.60267	5.3187	1.92626	2.42391e-07	4.93181e-06	up
AGFG1	982.585	2073.39	2.11014	1.03102	2.45061e-07	4.9744e-06	up
HBM	6.82796	105.461	15.4454	2.40338	2.45853e-07	4.98756e-06	up
HIST1H2BL	2.26613	7.91267	3.4917	1.60142	2.50552e-07	5.07691e-06	up
ADTRP	49.8637	118.368	2.37383	1.17516	2.53177e-07	5.11509e-06	up
CABP5	96.1443	333.466	3.46839	1.59173	2.55539e-07	5.1598e-06	up
CALM2P2	35.084	78.5823	2.23983	1.10375	2.5632e-07	5.17255e-06	up
PLSCR4	2.86256	10.6728	3.7284	1.64495	2.72378e-07	5.46147e-06	up
LRRC70	6.10149	18.6776	3.06115	1.45593	2.7255e-07	5.46175e-06	up
MTCO3P12	4.62995	21.4233	4.62711	1.8421	2.88397e-07	5.72616e-06	up
HIST1H4K	7.67478	21.9237	2.8566	1.37833	3.0025e-07	5.92402e-06	up
TRIM10	8.57755	31.747	3.70118	1.64878	3.04155e-07	5.9908e-06	up
DDX47	86.3069	178.983	2.07379	1.00753	3.19148e-07	6.2611e-06	up
SELENBP1	7.24569	216.919	29.9376	2.46608	3.19505e-07	6.26455e-06	up
LOX	7.97882	20.5252	2.57246	1.25399	3.35543e-07	6.55296e-06	up
XIRP2	3.11243	12.5696	4.03852	1.71683	3.41715e-07	6.66594e-06	up
RGS1	186.993	673.472	3.60159	1.62467	3.45581e-07	6.72997e-06	up
INHBA-AS1	1.19169	6.28875	5.27717	1.93041	3.48257e-07	6.77443e-06	up
PRKG1-AS1	0.638501	4.70512	7.36901	2.11992	3.74204e-07	7.20609e-06	up
WNT11	11.2573	32.1453	2.85551	1.3816	3.81735e-07	7.33474e-06	up
HSPA2	6.01669	16.2812	2.70601	1.32221	3.86132e-07	7.41512e-06	up
FAM217A	2.539	9.76495	3.84599	1.67517	4.04113e-07	7.74318e-06	up
SCGB1C1	8.38722	38.1224	4.5453	1.81986	4.38585e-07	8.33036e-06	up
CD151	1006.41	2542.59	2.52639	1.24624	4.58869e-07	8.62547e-06	up
UBL4A	676.319	1423.27	2.10444	1.02525	4.60225e-07	8.63154e-06	up
PTGFR	1.38115	7.55393	5.46932	1.95232	4.62034e-07	8.66075e-06	up
EGLN3	37.573	86.7028	2.30758	1.13562	4.62872e-07	8.67176e-06	up
SPSB4	0.934589	10.7914	11.5467	2.28885	4.67931e-07	8.74281e-06	up
MAP6	1.46049	6.03172	4.12994	1.73816	4.88357e-07	9.07046e-06	up
MEST	45.9764	112.474	2.44635	1.2043	5.48054e-07	1.00602e-05	up
TMEM17	5.15014	13.6412	2.6487	1.27902	5.65225e-07	1.03589e-05	up
MT-TL2	78.7841	261.729	3.3221	1.53887	5.68594e-07	1.04151e-05	up
AP1M2	36.2404	133.239	3.67653	1.63567	5.7276e-07	1.04826e-05	up
MAGI2-AS3	53.554	263.351	4.91749	1.876	5.80234e-07	1.05834e-05	up
NDUFAF4P3	1.16495	6.23508	5.35221	1.91842	5.85268e-07	1.06696e-05	up
NENF	287.461	604.074	2.10141	1.02247	5.95051e-07	1.0825e-05	up
GOLGA8T	4.00686	11.3089	2.82239	1.36516	6.19688e-07	1.12377e-05	up
MIR4742	0.561604	3.82575	6.81217	2.06368	6.22489e-07	1.12648e-05	up
OPRD1	7.31921	20.8218	2.84481	1.37186	6.22853e-07	1.12655e-05	up
YES1P1	7.28139	17.227	2.3659	1.16565	6.54622e-07	1.17907e-05	up
MT-TY	156.669	497.854	3.17775	1.49223	6.60704e-07	1.18817e-05	up
C1QB	48.2725	161.245	3.3403	1.54297	6.63672e-07	1.19164e-05	up
DCSTAMP	0.991094	4.98536	5.03016	1.85655	6.95632e-07	1.23962e-05	up
MERTK	88.304	191.048	2.16353	1.05846	6.95776e-07	1.23962e-05	up
LSMEM1	64.3027	172.335	2.68006	1.31019	7.05128e-07	1.2524e-05	up
SNORD13E	1.05387	6.30864	5.98616	1.98667	7.29784e-07	1.29022e-05	up
MT-ATP6	69397.6	169473	2.44206	1.20383	7.30206e-07	1.2903e-05	up
VN1R110P	1.48306	7.64536	5.15513	1.88636	7.31605e-07	1.29211e-05	up
FLVCR2	159.806	346.076	2.1656	1.05921	7.50165e-07	1.32017e-05	up
CRNDE	2.37508	8.03306	3.38222	1.54056	7.57799e-07	1.33292e-05	up
RPS20P4	0.529566	3.08754	5.83032	1.93539	7.98263e-07	1.39414e-05	up
ZBTB43	404.421	843.565	2.08586	1.01232	8.06733e-07	1.4061e-05	up
KEL	4.76344	18.3337	3.84884	1.66386	8.44191e-07	1.464e-05	up
MTND5P11	5.03482	26.2739	5.21845	1.9026	8.7683e-07	1.50923e-05	up
DNAAF3	0.501978	6.01496	11.9825	2.24943	9.02237e-07	1.54679e-05	up
FDX1P1	1.20077	4.72519	3.93513	1.66221	9.28683e-07	1.58431e-05	up
C1orf116	13.7968	43.7006	3.16745	1.48065	9.82915e-07	1.6669e-05	up
GCOM1	28.1248	118.326	4.20718	1.74106	1.01078e-06	1.70661e-05	up
CASC15	8.30355	23.5627	2.83767	1.35773	1.0543e-06	1.76885e-05	up
ENC1	277.563	596.896	2.15049	1.04908	1.09692e-06	1.835e-05	up
ELOBP1	0.596912	4.34764	7.28356	2.09036	1.10207e-06	1.84094e-05	up
CERNA1	17.9368	48.1201	2.68275	1.30293	1.11533e-06	1.8613e-05	up
TMC1	0.917911	5.22375	5.69091	1.9292	1.13774e-06	1.89319e-05	up
ALPK2	3.77508	12.6636	3.35452	1.53642	1.1363e-06	1.89319e-05	up
SMIM6	3.44209	10.8304	3.14647	1.47404	1.16759e-06	1.93913e-05	up
MT1L	2.97988	21.5404	7.2286	2.07898	1.17517e-06	1.9489e-05	up
NOTCH2NLA	13.7847	29.4802	2.13862	1.04237	1.19477e-06	1.97667e-05	up
OTOGL	0.206257	4.44612	21.5562	2.31617	1.23228e-06	2.029e-05	up
RAB3C	2.8068	9.50552	3.3866	1.5356	1.23676e-06	2.03443e-05	up
PGBD4P1	9.53738	28.0253	2.93847	1.39483	1.36322e-06	2.21502e-05	up
STRADB	173.534	363.116	2.09247	1.01271	1.41481e-06	2.28916e-05	up
HIPK1-AS1	3.0686	8.63691	2.81461	1.35252	1.55529e-06	2.4954e-05	up
MIR181A1HG	4.39349	15.112	3.43964	1.55242	1.64101e-06	2.62198e-05	up
MYZAP	30.929	128.788	4.164	1.72082	1.70926e-06	2.71844e-05	up
HIST1H2BD	117.079	339.225	2.89739	1.38536	1.84033e-06	2.9015e-05	up
ATP13A5	1.32464	6.55246	4.9466	1.83389	1.91465e-06	3.00769e-05	up
MGAT4B	1898.06	4003.1	2.10905	1.02245	1.97157e-06	3.08308e-05	up
CR1L	2.04894	8.55223	4.17397	1.69658	2.11539e-06	3.28714e-05	up
MEMO1P1	11.5202	26.4105	2.29254	1.12784	2.11833e-06	3.29023e-05	up
RHAG	0.249725	9.41987	37.721	2.31307	2.12076e-06	3.29252e-05	up
MT2A	812.632	3811.54	4.69036	1.8054	2.12664e-06	3.29868e-05	up
STEAP1B	4.7751	12.0735	2.52843	1.23507	2.13462e-06	3.30958e-05	up
RN7SL328P	0.657235	3.7888	5.76477	1.92671	2.16421e-06	3.34793e-05	up
IRX3	10.7619	45.0735	4.18825	1.71762	2.16597e-06	3.34916e-05	up
ACKR4	4.43698	10.4586	2.35715	1.1514	2.1856e-06	3.37346e-05	up
SCGB1C2	8.0318	27.4122	3.41296	1.5394	2.2786e-06	3.49669e-05	up
CMYA5	4.35147	9.96552	2.29015	1.13378	2.28832e-06	3.50728e-05	up
SPTA1	2.3434	11.3776	4.85518	1.80849	2.49518e-06	3.78364e-05	up
SNCA-AS1	0.501584	3.84274	7.66119	2.06736	2.51063e-06	3.8004e-05	up
BEST2	3.15874	12.4112	3.92917	1.66276	2.52666e-06	3.81964e-05	up
HSPB6	0.848331	4.50189	5.30676	1.87576	2.70932e-06	4.04968e-05	up
GAPDHP42	3.07723	11.2458	3.65451	1.60201	2.81854e-06	4.19658e-05	up
RN7SL172P	2.63603	7.975	3.02538	1.42465	2.8289e-06	4.21018e-05	up
RPL35AP32	2.87919	7.4558	2.58955	1.24898	2.8307e-06	4.21105e-05	up
REEP1	5.60089	24.0749	4.2984	1.73381	2.83366e-06	4.21183e-05	up
CLK3P2	1.66449	6.29247	3.78043	1.61684	2.92048e-06	4.32597e-05	up
MTRNR2L3	0.334474	2.61687	7.82383	2.03355	2.94217e-06	4.35249e-05	up
PPP1R12A-AS1	6.24443	15.6978	2.51389	1.22201	2.94911e-06	4.3609e-05	up
ITGA7	37.2353	88.2474	2.36999	1.16022	3.01478e-06	4.44082e-05	up
CYS1	0.811632	5.46734	6.73623	1.98957	3.10346e-06	4.54436e-05	up
CCDC3	6.99153	40.7317	5.82587	1.92464	3.19627e-06	4.67036e-05	up
MSR1	79.3199	172.977	2.18075	1.06131	3.20781e-06	4.68326e-05	up
CTSL	193.879	449.4	2.31793	1.13336	3.283e-06	4.77487e-05	up
SLC30A1	363.967	1035.08	2.84387	1.35896	3.36779e-06	4.88053e-05	up
ABO	82.9552	222.496	2.68212	1.29532	3.45984e-06	5.00048e-05	up
MT-ND6	24587.3	58116.3	2.36368	1.15547	3.4865e-06	5.03633e-05	up
ZNF483	15.9067	33.6716	2.11681	1.02429	3.54685e-06	5.10912e-05	up
HJURP	26.3829	55.7344	2.11252	1.02551	3.56063e-06	5.1247e-05	up
BCL2L1	743.819	1743.75	2.34432	1.14561	3.57991e-06	5.15029e-05	up
B4GALT1-AS1	12.5491	26.6142	2.12081	1.02181	3.90476e-06	5.56203e-05	up
CAPN8	7.33472	16.0329	2.18589	1.0363	3.93948e-06	5.60917e-05	up
VCAM1	3.44254	14.664	4.25963	1.71501	3.97872e-06	5.65804e-05	up
METTL7B	1.90908	13.0674	6.84488	1.991	4.17464e-06	5.91069e-05	up
CETN4P	2.45045	8.01586	3.27118	1.47212	4.17596e-06	5.91069e-05	up
RUNDC3A	5.5366	31.243	5.64299	1.89441	4.19605e-06	5.93047e-05	up
MORC1	0.772349	4.54275	5.88174	1.89176	4.2205e-06	5.96258e-05	up
NDUFA5P11	4.10862	8.8111	2.14454	1.01757	4.24806e-06	5.99906e-05	up
SKAP1-AS1	5.12033	14.8756	2.9052	1.3738	4.29502e-06	6.05547e-05	up
KRT8	8.53236	22.9765	2.69287	1.29846	4.39469e-06	6.18253e-05	up
TRIM15	1.17505	5.43629	4.62645	1.75839	4.4608e-06	6.25599e-05	up
PDZK1IP1	199.769	614.582	3.07646	1.43399	4.5478e-06	6.3625e-05	up
MIR5692C2	0.208671	1.8438	8.83589	2.02204	4.9897e-06	6.88921e-05	up
FABP4	0.309523	3.34055	10.7926	2.10873	5.02337e-06	6.92403e-05	up
INKA1	58.4686	150.038	2.56613	1.24339	5.16541e-06	7.09151e-05	up
EDNRB	1.32374	7.07923	5.34789	1.84793	5.22613e-06	7.16063e-05	up
GABRE	0.522332	3.50322	6.70688	1.94647	5.23346e-06	7.16783e-05	up
ODF3	4.04188	13.8189	3.41894	1.53083	5.26447e-06	7.19602e-05	up
TP53TG3D	1.50035	7.70329	5.13434	1.82445	5.36687e-06	7.31284e-05	up
RPL10P12	3.48833	12.2847	3.52165	1.55271	5.5067e-06	7.485e-05	up
MIR5690	0.150611	1.69732	11.2696	2.06265	5.74826e-06	7.76206e-05	up
CD69	1031.48	2685.87	2.60389	1.25911	5.95399e-06	8.01166e-05	up
COL1A1	2.14833	8.78567	4.08953	1.67089	6.05745e-06	8.14454e-05	up
PHACTR3	6.71056	17.1995	2.56305	1.2265	6.24972e-06	8.3737e-05	up
DLEU2L	8.09044	18.4463	2.28001	1.10363	6.88825e-06	9.11953e-05	up
GIPC3	73.7026	193.282	2.62246	1.26342	7.22675e-06	9.51296e-05	up
HIST1H2BC	98.5024	262.593	2.66585	1.28182	7.26281e-06	9.54589e-05	up
TNS1	118.209	289.665	2.45045	1.18946	7.47016e-06	9.77747e-05	up
CXCL13	1.14163	4.20529	3.68357	1.59005	7.54328e-06	9.86196e-05	up
RN7SL2	512.182	1332.4	2.60142	1.25549	7.57473e-06	9.89558e-05	up
KIF28P	24.7113	68.1968	2.75974	1.31525	7.60232e-06	9.92411e-05	up
ZSWIM5P2	0.461695	3.20086	6.93284	1.93606	7.60754e-06	9.92718e-05	up
ZNHIT1P1	0.408835	2.9126	7.12415	1.93432	8.52378e-06	0.000109572	up
OSMR	12.4245	31.0695	2.50066	1.20851	8.74402e-06	0.00011211	up
L3MBTL4-AS1	1.44799	5.98476	4.13315	1.64591	8.75547e-06	0.000112174	up
SLC26A5	2.71353	6.7856	2.50065	1.19414	8.8697e-06	0.000113385	up
RNU6-652P	0.711379	3.45839	4.86152	1.76323	9.24385e-06	0.000117559	up
IL22	0.515604	2.91094	5.64568	1.84781	9.56737e-06	0.000121049	up
BACH1-IT2	9.08562	19.0958	2.10176	1.01292	9.71319e-06	0.00012249	up
MTCO2P12	0.645885	4.69527	7.26951	1.96083	1.0059e-05	0.000126252	up
RSPH1	4.16144	12.8981	3.09944	1.42205	1.00565e-05	0.000126252	up
TMEM155	2.35627	7.60771	3.22871	1.47309	1.0101e-05	0.000126686	up
ADAMTS2	10.7459	102.971	9.5824	2.04783	1.02033e-05	0.000127856	up
RNU6-638P	1.46123	6.3868	4.37083	1.69719	1.02219e-05	0.000128017	up
STAM-AS1	0.449823	2.28153	5.07207	1.7881	1.02281e-05	0.000128048	up
GFAP	3.6918	11.577	3.13588	1.41873	1.04208e-05	0.00013013	up
GP5	53.081	111.272	2.09627	1.00277	1.04624e-05	0.000130555	up
KCNRG	4.79074	10.7287	2.23946	1.06779	1.0708e-05	0.000133331	up
PFKFB3	966.8	2983.77	3.08623	1.42185	1.13713e-05	0.000140375	up
ST8SIA5	1.86697	8.83857	4.73419	1.74717	1.14114e-05	0.000140668	up
ARHGAP8	1.61286	6.2426	3.87053	1.61606	1.18825e-05	0.000145438	up
CFAP74	0.812117	4.62101	5.69008	1.84015	1.18931e-05	0.000145516	up
TMEM178B	2.66259	6.47998	2.43371	1.19056	1.20943e-05	0.00014782	up
TIMP3	2.03355	8.33719	4.09982	1.64353	1.21244e-05	0.000148083	up
NEK10	4.21079	9.82787	2.33397	1.12672	1.21875e-05	0.000148644	up
PDK4	170.32	412.375	2.42118	1.17194	1.27111e-05	0.000154322	up
TTK	8.56912	18.4302	2.15077	1.04537	1.37992e-05	0.000165782	up
RNF212B	1.6709	5.58235	3.34093	1.45127	1.39502e-05	0.000167363	up
P2RX6P	0.247495	3.08821	12.4779	2.06333	1.40242e-05	0.000168194	up
NCLP1	1.65519	5.06489	3.06	1.38495	1.42079e-05	0.000170188	up
GLYATL2	1.94276	8.1609	4.20067	1.66403	1.44595e-05	0.000172693	up
PLS3	5.86496	14.0029	2.38755	1.14303	1.44748e-05	0.000172707	up
DDX11L1	48.8791	174.262	3.56517	1.54275	1.45946e-05	0.000173886	up
GPRC5D-AS1	4.75056	12.8446	2.70381	1.27604	1.45912e-05	0.000173886	up
BUB1B	13.1659	27.4104	2.08192	1.00161	1.47266e-05	0.000175096	up
PA2G4P6	3.00481	8.22115	2.73599	1.29062	1.48111e-05	0.000176041	up
RNA5-8SN2	1.45416	6.64778	4.57157	1.72854	1.50757e-05	0.000178387	up
CCDC196	0.553108	2.54225	4.59629	1.70916	1.51253e-05	0.00017879	up
SENCR	80.5161	188.102	2.33621	1.12873	1.61989e-05	0.000189658	up
TNNT1	43.2709	125.732	2.9057	1.35788	1.66133e-05	0.000193727	up
HIST1H3B	5.86623	20.9578	3.57262	1.54013	1.69973e-05	0.000197471	up
ATP13A5-AS1	0.68464	4.05057	5.91634	1.84311	1.73214e-05	0.000200427	up
HIST1H1C	332.803	807.728	2.42704	1.17137	1.77355e-05	0.000204601	up
MISP3	125.824	339.037	2.69454	1.28184	1.77979e-05	0.000205115	up
IFNG	45.1321	135.739	3.00759	1.3894	1.8251e-05	0.000209847	up
EMCN	0.735915	7.25679	9.8609	2.00235	1.84169e-05	0.000211543	up
PARD6G	21.2006	44.7217	2.10945	1.00449	1.87212e-05	0.00021461	up
KBTBD12	1.77229	6.47451	3.6532	1.53183	1.92726e-05	0.000219474	up
NEURL1B	12.0208	28.6273	2.38149	1.14201	1.93049e-05	0.000219769	up
FAM83A	0.759447	4.90839	6.46312	1.86213	1.94451e-05	0.000221219	up
WWC1	14.2076	31.5193	2.21849	1.06221	1.94422e-05	0.000221219	up
VCAN-AS1	15.4227	61.1117	3.96244	1.61364	2.10823e-05	0.00023742	up
NXN	18.7823	51.487	2.74126	1.29408	2.19128e-05	0.000245093	up
ERC2	0.570435	2.84111	4.9806	1.72275	2.2299e-05	0.000248618	up
MFSD1P1	1.53781	6.37066	4.14269	1.64368	2.2937e-05	0.000254779	up
MAGI2	8.00148	19.2039	2.40005	1.14837	2.29549e-05	0.000254851	up
MIR222HG	26.8846	58.5214	2.17676	1.04489	2.34683e-05	0.0002603	up
GALNT5	0.865499	3.80893	4.40084	1.65539	2.39308e-05	0.000264834	up
GPR137C	2.46834	6.05147	2.45164	1.16511	2.41963e-05	0.000267429	up
TNNC2	65.8061	175.256	2.66322	1.26491	2.49133e-05	0.000274327	up
MTDHP3	10.3121	42.5097	4.12231	1.63532	2.50058e-05	0.000274968	up
JCAD	1.4671	5.3467	3.64441	1.51839	2.55786e-05	0.000280552	up
HSPB3	0.395142	2.99838	7.58809	1.93616	2.58367e-05	0.000283203	up
RNU6-574P	3.94291	13.4774	3.41813	1.49523	2.59992e-05	0.000284428	up
SLC1A3	13.3422	28.9291	2.16824	1.03851	2.8556e-05	0.000309085	up
EEF1A1P3	2.52273	7.05602	2.79698	1.30263	3.02003e-05	0.000324139	up
SNORA38B	0.958338	3.1969	3.33588	1.46499	3.02249e-05	0.000324202	up
HIST1H3C	1.19094	4.68583	3.93458	1.58309	3.06987e-05	0.000328671	up
HCFC1-AS1	7.18055	19.0163	2.6483	1.25315	3.06971e-05	0.000328671	up
COL25A1	1.6211	5.36686	3.31063	1.4421	3.10104e-05	0.0003317	up
NAP1L4P1	10.8317	32.7782	3.02615	1.38314	3.1315e-05	0.000334544	up
ITGA6-AS1	31.3358	69.1066	2.20536	1.05485	3.16736e-05	0.000337747	up
TMEM140	758.555	1623.09	2.13972	1.02373	3.18766e-05	0.000339388	up
SLC6A11	0.497573	3.36918	6.77122	1.86777	3.22501e-05	0.000342638	up
GSTA1	1.80779	17.8893	9.89565	1.96128	3.28403e-05	0.000347825	up
UPK1A-AS1	0.806037	4.18299	5.18958	1.75626	3.4396e-05	0.0003612	up
VSIG4	51.7652	157.991	3.05207	1.38972	3.46099e-05	0.000363081	up
TMEM56	6.66692	16.2318	2.43468	1.15396	3.46277e-05	0.000363081	up
FAM9C	1.01658	3.50728	3.45009	1.46978	3.63476e-05	0.000378471	up
PLIN2	466.64	999.859	2.14268	1.02436	3.66114e-05	0.000380758	up
GSTA6P	6.37509	21.8921	3.434	1.48439	3.68796e-05	0.000382741	up
CHST8	20.1415	60.1696	2.98735	1.36805	3.75178e-05	0.000388216	up
HPN	4.38586	13.0209	2.96884	1.35487	3.75461e-05	0.000388374	up
COL4A2	3.65413	11.5688	3.16596	1.40997	3.84315e-05	0.00039616	up
RIMKLA	3.21395	11.1214	3.46034	1.47822	3.89649e-05	0.00040053	up
MYOSLID	7.94034	18.8691	2.37637	1.12718	4.03589e-05	0.000413628	up
MYCBP2-AS1	2.22944	6.94499	3.11513	1.40246	4.06432e-05	0.000416294	up
SNRPGP4	2.434	6.58373	2.7049	1.25844	4.19364e-05	0.000428269	up
ETF1P2	2.28565	6.35973	2.78246	1.28919	4.24088e-05	0.000432199	up
RPS29P16	0.851553	3.38748	3.97801	1.57943	4.2436e-05	0.000432242	up
COX7A1	2.5074	5.8287	2.3246	1.1108	4.41907e-05	0.000447454	up
MIR3192	0.53784	2.49003	4.62968	1.66602	4.49485e-05	0.000453266	up
PIGHP1	11.7789	25.9682	2.20464	1.05307	4.56832e-05	0.000459065	up
OR2L13	1.04497	3.78728	3.62429	1.48724	4.60207e-05	0.000461785	up
RNY1P12	0.875987	3.19213	3.64404	1.50464	4.64313e-05	0.000465094	up
RPS3P2	0.388928	2.02187	5.19856	1.73605	4.75745e-05	0.000475442	up
KLF1	5.76084	23.5159	4.08202	1.60187	4.79943e-05	0.000478945	up
DDX11L5	8.43734	21.9367	2.59995	1.22243	5.06562e-05	0.000500876	up
RNU6-1152P	0.549582	2.31598	4.21408	1.59795	5.07686e-05	0.0005017	up
AR	7.70663	22.0463	2.86069	1.3179	5.16729e-05	0.000508888	up
NPM1P26	5.85569	16.7964	2.86838	1.32618	5.3004e-05	0.000519773	up
IL21	1.06799	3.82173	3.57842	1.5133	5.44285e-05	0.000532155	up
MCOLN3	11.0865	25.8193	2.32891	1.10633	5.45391e-05	0.000532709	up
LEFTY1	9.99415	28.3293	2.83459	1.30704	5.65073e-05	0.000548982	up
TRMT9B	4.99682	10.524	2.10613	1.0023	5.71974e-05	0.000554595	up
MT-TK	20.3188	228.186	11.2303	1.93101	5.89994e-05	0.000570465	up
VAC14-AS1	3.70609	9.62648	2.59747	1.2271	5.95424e-05	0.000574911	up
KITLG	2.10398	5.79527	2.75443	1.2833	6.13278e-05	0.000589676	up
TCTEX1D1	7.31824	20.203	2.76064	1.27419	6.16897e-05	0.000592826	up
GABRD	3.94721	17.6524	4.47212	1.64363	6.21378e-05	0.000596468	up
LONRF3	55.0696	119.042	2.16167	1.02998	6.21664e-05	0.000596576	up
SPARCL1	0.884191	2.9209	3.30347	1.42791	6.25485e-05	0.00059941	up
RPL23AP49	0.944777	3.28871	3.48094	1.45648	6.54995e-05	0.000623193	up
PTPRD	1.0094	3.42246	3.39059	1.42932	6.63818e-05	0.000630729	up
RN7SKP64	0.1755	1.5166	8.6416	1.82895	6.6491e-05	0.000631582	up
MLF1	8.02645	17.1437	2.1359	1.0192	6.67233e-05	0.00063344	up
RAP1GAP	6.70926	49.6396	7.39867	1.84436	6.69683e-05	0.000635416	up
FAM225A	8.83985	27.0507	3.06009	1.37481	6.77494e-05	0.00064089	up
SEMA6B	38.578	150.324	3.89661	1.55898	7.19597e-05	0.00067462	up
EXOC3L2	11.4212	28.2685	2.47508	1.1676	7.28672e-05	0.000682201	up
RF02271	5.29704	12.0799	2.28049	1.07399	7.38e-05	0.000689999	up
RNA5SP37	2.09265	6.76739	3.23388	1.41499	7.42532e-05	0.000693364	up
KLHDC8B	171.149	380.997	2.22611	1.061	7.42603e-05	0.000693364	up
PXT1	8.42248	21.3716	2.53744	1.19696	7.54099e-05	0.000702199	up
DUTP2	0.596742	2.6504	4.44144	1.6206	7.58192e-05	0.000705145	up
GBP1P1	12.6147	47.0956	3.73339	1.5273	7.70661e-05	0.000715499	up
SEC14L2	46.8508	99.2034	2.11743	1.00222	7.71263e-05	0.000715865	up
CNTN4-AS1	0.98129	7.7454	7.89308	1.8402	8.01407e-05	0.000739668	up
AIF1L	1.0193	4.01778	3.94171	1.54937	8.16093e-05	0.000751615	up
SYT5	0.671289	4.20054	6.25743	1.76785	8.17719e-05	0.000752912	up
TANC1	6.60237	14.6548	2.21963	1.04797	8.56186e-05	0.000784356	up
INSYN2	1.81106	7.93948	4.38389	1.60939	8.8776e-05	0.0008107	up
GREM2	9.52828	22.8206	2.39504	1.13683	9.07153e-05	0.000826526	up
DDAH1	2.72134	9.06163	3.32984	1.42468	9.17534e-05	0.00083546	up
GYPB	0.172491	4.69453	27.2162	1.92579	9.19535e-05	0.00083706	up
SLCO2A1	1.22287	4.53732	3.7104	1.49736	9.25524e-05	0.000841403	up
UGT2B28	2.04102	7.04155	3.45001	1.45584	9.28513e-05	0.000843676	up
RC3H1-IT1	0.410389	1.94313	4.73484	1.66019	9.2995e-05	0.000844537	up
RAMP1	26.154	56.9589	2.17783	1.03371	9.35928e-05	0.000848628	up
SNORA70G	1.33022	5.08614	3.82352	1.53048	9.73398e-05	0.000879369	up
BIRC6-AS2	3.1426	7.44432	2.36884	1.11962	9.81185e-05	0.000885709	up
ZNF208	16.6521	39.0579	2.34553	1.1121	0.00010112	0.000908529	up
BPIFB3	0.662332	4.24011	6.40179	1.76222	0.000101731	0.000912121	up
HIST1H4E	7.44524	17.3748	2.33367	1.11405	0.000104939	0.000936265	up
AKAP2	1.60507	4.08953	2.54788	1.19396	0.000107232	0.000954499	up
GLOD5	0.692136	3.79096	5.47719	1.6965	0.000107359	0.000955386	up
RD3L	1.18018	4.08056	3.45756	1.44977	0.000108356	0.000963261	up
DRC7	11.0466	25.274	2.28794	1.08269	0.00011217	0.000991296	up

## Sheet: PSS DEGs
Gene name	Count_Control	Count_pSS	Fold change	log2 (Fold change)	Pvalue	FDR	Type
CXCR2	3865.29	91.0601	0.0235584	-4.78196	2.46114e-53	8.44417e-49	down
TNFRSF10C	1391.56	30.9571	0.0222464	-4.78579	4.74413e-49	8.13855e-45	down
CCR3	189.47	10.6289	0.0560978	-3.80177	1.9778e-46	2.26194e-42	down
CXCR1	3432.66	47.4629	0.0138268	-5.14243	2.7178e-45	2.33119e-41	down
MANSC1	132.972	7.45846	0.0560906	-3.71702	1.56497e-36	1.07388e-32	down
CACNG6	34.407	0.821572	0.0238781	-4.40371	2.58734e-35	1.47953e-31	down
MME	611.861	25.2691	0.0412988	-4.00969	3.22673e-35	1.58156e-31	down
PI3	291.688	1.88844	0.00647418	-5.23277	5.44281e-34	2.33429e-30	down
CMTM2	751.98	26.9693	0.0358644	-4.11738	9.86297e-34	3.75999e-30	down
BASP1	2040.28	332.878	0.163153	-2.48293	4.14516e-32	1.4222e-28	down
S100P	562.811	21.3804	0.0379885	-4.01048	6.30506e-31	1.9666e-27	down
FCGR3B	8044.97	117.032	0.0145472	-4.70028	1.57789e-30	4.51144e-27	down
PGLYRP1	239.589	9.11027	0.0380245	-3.99154	3.29855e-30	8.70564e-27	down
ADGRE3	460.113	58.6379	0.127442	-2.76662	4.20101e-30	1.02955e-26	down
BTG2	11976	2843.84	0.237462	-1.99602	6.70359e-28	1.53333e-24	down
KRT23	252.647	6.28476	0.0248757	-4.23863	2.25578e-27	4.83723e-24	down
ALPL	1428.99	21.8531	0.0152926	-4.53252	3.1272e-27	6.31143e-24	down
MGAM	950.844	58.0988	0.0611023	-3.48754	6.4527e-26	1.22996e-22	down
TGFA	125.029	25.2565	0.202005	-2.18185	3.48977e-25	6.30179e-22	down
FRAT2	1941.42	457.596	0.235702	-1.99422	1.4164e-24	2.20894e-21	down
RHOXF1P1	12.0116	0.258756	0.0215421	-4.03912	1.56265e-24	2.33106e-21	down
SLPI	111.49	3.87867	0.0347894	-3.90141	2.51595e-24	3.49187e-21	down
PTGS2	3756.35	245.789	0.065433	-3.39437	2.54435e-24	3.49187e-21	down
CNTNAP3	138.713	3.11868	0.0224829	-4.13302	2.32672e-23	3.04163e-20	down
LRRC4	232.037	36.7526	0.158391	-2.4662	2.46956e-23	3.04163e-20	down
MAP7	49.2865	12.9308	0.26236	-1.84479	2.48224e-23	3.04163e-20	down
CXCL1	473.035	18.0328	0.0381214	-3.80404	3.1667e-23	3.74654e-20	down
MMP25	3862.1	287.087	0.0743344	-3.2524	4.36511e-23	4.99223e-20	down
MMP9	705.476	19.7811	0.0280394	-4.00404	4.65725e-23	5.15453e-20	down
WLS	413.172	73.6558	0.178269	-2.32679	5.67417e-23	6.08377e-20	down
DGAT2	657.379	94.9532	0.144442	-2.56543	1.13701e-22	1.18214e-19	down
EPHB1	116.419	12.7829	0.109802	-2.85341	1.51167e-22	1.48186e-19	down
HCAR2	672.541	40.9686	0.0609161	-3.40924	3.3576e-22	3.19998e-19	down
CACNG8	37.0505	2.43073	0.0656059	-3.3123	1.24544e-21	1.1245e-18	down
NLRP6	387.925	79.8302	0.205788	-2.14573	3.16505e-21	2.71483e-18	down
IER2	13180.4	2619.37	0.198733	-2.18534	5.27609e-21	4.41519e-18	down
RGS2	10344.1	2245.58	0.217088	-2.0792	5.84783e-21	4.77712e-18	down
CAMP	230.299	15.351	0.0666567	-3.26935	6.48916e-20	5.17775e-17	down
CA8	24.8858	4.25581	0.171014	-2.34723	7.54085e-20	5.88015e-17	down
MBOAT7	4645.55	1102.72	0.237371	-1.96346	9.64829e-20	7.19636e-17	down
TRIM51BP	10.6948	0.319793	0.0299017	-3.69628	1.00572e-19	7.34179e-17	down
ENPP3	34.7215	6.04653	0.174144	-2.31884	1.1387e-19	8.13933e-17	down
CEBPE	64.4657	12.9178	0.200383	-2.15736	2.65852e-19	1.86151e-16	down
PHOSPHO1	1672.8	272.374	0.162826	-2.39588	4.35381e-19	2.98758e-16	down
SLC19A1	1074.4	279.434	0.260083	-1.84701	4.70451e-19	3.16494e-16	down
CLC	649.68	22.5458	0.0347029	-3.68622	5.81663e-19	3.83786e-16	down
KIAA1324	274.288	82.3611	0.300273	-1.66387	6.42734e-19	4.16079e-16	down
LRG1	706.916	64.7408	0.091582	-2.96473	1.13584e-18	7.21682e-16	down
CPA3	69.1928	3.51552	0.0508076	-3.40857	2.25823e-18	1.37812e-15	down
AOC2	106.583	23.3165	0.218763	-2.05066	2.71177e-18	1.60415e-15	down
ICAM3	1247.1	392.679	0.314875	-1.60114	5.9721e-18	3.47293e-15	down
MS4A2	110.903	5.30806	0.0478621	-3.42679	8.90924e-18	5.01108e-15	down
NECAB2	47.3159	2.12795	0.0449733	-3.45243	1.07736e-17	5.86731e-15	down
EEPD1	335.789	122.849	0.365852	-1.4052	1.18101e-17	6.33131e-15	down
TRIM51EP	13.7686	0.441488	0.0320648	-3.59291	1.21334e-17	6.40454e-15	down
TCN1	70.436	1.53265	0.0217594	-3.79926	1.30489e-17	6.68219e-15	down
AOC3	83.5561	16.2626	0.194631	-2.18134	1.77847e-17	8.84335e-15	down
IER3	2093.23	386.975	0.18487	-2.2373	1.85612e-17	8.9695e-15	down
VNN2	2632.01	754.387	0.28662	-1.71809	1.92611e-17	9.17844e-15	down
CEP19	138.923	37.4316	0.269441	-1.78939	2.14739e-17	9.95633e-15	down
HDC	426.369	38.3514	0.0899488	-2.94253	2.9799e-17	1.36321e-14	down
TIGD3	96.8968	21.3559	0.220398	-2.0295	3.52585e-17	1.59173e-14	down
SLC45A4	944.833	309.96	0.328058	-1.54601	3.71735e-17	1.63516e-14	down
AKAP12	69.7146	6.78808	0.0973696	-2.86856	5.10107e-17	2.18772e-14	down
EGR1	15052.7	1877.98	0.124761	-2.63582	8.0664e-17	3.29474e-14	down
LUCAT1	487.168	81.3705	0.167028	-2.3381	8.87961e-17	3.54255e-14	down
FRAT1	975.074	349.948	0.358893	-1.42818	9.32141e-17	3.67607e-14	down
KLHDC7A	6.82409	0.253843	0.0371981	-3.38261	1.14719e-16	4.37334e-14	down
CXCL8	12154.5	663.162	0.0545609	-3.29806	1.26752e-16	4.77897e-14	down
JUNB	31070.6	9737.77	0.313408	-1.6022	1.33854e-16	4.99189e-14	down
F2RL1	171.551	41.7353	0.243282	-1.90929	1.51136e-16	5.51648e-14	down
G0S2	9275.26	568.528	0.0612952	-3.20793	2.37851e-16	8.24309e-14	down
FCER1A	434.123	111.812	0.257559	-1.84208	2.92388e-16	9.83514e-14	down
MS4A3	128.444	8.52213	0.0663488	-3.13274	5.43516e-16	1.71083e-13	down
SIGLEC17P	220.589	63.922	0.289779	-1.69423	6.59226e-16	2.03766e-13	down
ZDHHC18	3758.21	1183.34	0.314868	-1.59233	8.99664e-16	2.73399e-13	down
KIAA1257	43.8516	7.78018	0.177421	-2.25478	9.91916e-16	2.93385e-13	down
RPL39P3	2645.45	778.608	0.294319	-1.67626	1.03779e-15	3.0433e-13	down
TREM1	2248.73	522.271	0.232251	-1.95888	1.21055e-15	3.51983e-13	down
CSF2RB	4465.74	1400.04	0.313508	-1.59703	1.26675e-15	3.65229e-13	down
NINJ2	212.058	87.4514	0.412394	-1.23943	1.38933e-15	3.93948e-13	down
PPL	47.4719	7.4595	0.157135	-2.37216	1.53605e-15	4.26095e-13	down
VNN3	398.121	80.5874	0.202419	-2.11218	1.53995e-15	4.26095e-13	down
OR2I1P	6.05825	0.323197	0.0533483	-3.14771	1.62979e-15	4.47344e-13	down
STX3	1186.7	415.083	0.349781	-1.4576	1.69529e-15	4.61629e-13	down
B3GNT8	227.335	46.3993	0.204101	-2.10105	1.78508e-15	4.82253e-13	down
MPZL1	565.993	218.082	0.385309	-1.33055	2.55423e-15	6.79346e-13	down
TNFAIP6	134.577	12.6039	0.0936557	-2.83726	4.51196e-15	1.14671e-12	down
NOV	30.3613	3.20626	0.105603	-2.74574	5.0681e-15	1.26925e-12	down
CADM4	60.6548	21.5446	0.355199	-1.43159	5.97603e-15	1.46455e-12	down
TRPM6	82.2348	3.90076	0.0474345	-3.27748	6.20198e-15	1.50915e-12	down
ATP2B1-AS1	500.113	184.195	0.368307	-1.39003	6.81324e-15	1.64621e-12	down
PLIN5	139.265	22.943	0.164744	-2.32003	7.50935e-15	1.77687e-12	down
OLFM4	66.2542	1.84376	0.0278287	-3.49445	7.61961e-15	1.79061e-12	down
TGM3	37.3069	1.20378	0.0322668	-3.43532	8.16198e-15	1.89215e-12	down
SNORD3B-1	38.2649	5.43327	0.141991	-2.46955	8.49594e-15	1.93043e-12	down
MSRB1	2794.55	681.803	0.243976	-1.89328	9.12543e-15	2.05983e-12	down
TNFRSF1A	2783.85	1183.36	0.425081	-1.20002	1.64756e-14	3.62357e-12	down
CHI3L1	558.564	19.379	0.0346943	-3.39687	1.73013e-14	3.75145e-12	down
SALL2	49.8474	19.1169	0.383508	-1.32748	1.7385e-14	3.75145e-12	down
RHOXF1P2	5.57984	0.222504	0.0398764	-3.16643	2.72865e-14	5.60598e-12	down
RPS13P2	85.7439	32.4791	0.378791	-1.35106	3.02674e-14	6.14482e-12	down
FPR2	914.142	158.595	0.173491	-2.25476	4.10831e-14	8.05463e-12	down
ADGRG3	878.809	74.6968	0.0849978	-2.87795	4.21015e-14	8.2074e-12	down
BTNL8	131.094	4.73375	0.0361096	-3.34432	4.32329e-14	8.38034e-12	down
ST6GALNAC2	66.5658	15.0751	0.226469	-1.96333	5.67648e-14	1.07361e-11	down
PADI2	923.094	231.532	0.250822	-1.85118	8.9759e-14	1.62086e-11	down
FBLN2	106.46	31.3326	0.294314	-1.66024	1.28417e-13	2.2829e-11	down
KCNJ15	933.313	67.4514	0.072271	-2.96292	1.42269e-13	2.50321e-11	down
C17orf113	26.7026	10.6691	0.399554	-1.27663	1.49895e-13	2.62392e-11	down
FPR1	5332.45	1195.29	0.224153	-1.97478	1.53131e-13	2.65349e-11	down
GLT1D1	1369.33	420.623	0.307174	-1.60929	1.57473e-13	2.68802e-11	down
ASPRV1	101.722	22.5238	0.221426	-1.98428	1.58525e-13	2.69256e-11	down
RBKS	129.189	34.34	0.265813	-1.77995	1.72147e-13	2.86717e-11	down
PPP1R3B	344.8	127.816	0.370697	-1.37357	2.00174e-13	3.27509e-11	down
C10orf82	8.13986	0.251255	0.0308673	-3.23449	2.61809e-13	4.12049e-11	down
RF00004	55.536	7.10841	0.127996	-2.52214	2.89624e-13	4.53745e-11	down
C5AR1	3954.59	1190.71	0.301096	-1.63146	2.99531e-13	4.67133e-11	down
SRGAP3	38.3989	16.1507	0.420602	-1.20855	3.15663e-13	4.87223e-11	down
MID1IP1	1947.9	774.296	0.397503	-1.28404	3.62549e-13	5.50401e-11	down
FFAR2	2691.92	342.207	0.127124	-2.52322	3.70816e-13	5.60471e-11	down
IFITM2	15156.7	4176.71	0.275569	-1.73578	3.76876e-13	5.67132e-11	down
DACH1	18.0743	5.96895	0.330246	-1.51149	3.87565e-13	5.75643e-11	down
KY	65.3125	4.13857	0.0633657	-3.00666	4.13983e-13	6.07371e-11	down
PTAFR	2838.01	938.37	0.330644	-1.51577	4.90597e-13	7.0135e-11	down
RAB36	47.1539	12.7764	0.270951	-1.74187	5.50283e-13	7.7378e-11	down
DHRS13	194.214	80.0054	0.411944	-1.23343	5.55588e-13	7.7805e-11	down
CYP4F12	22.3065	3.97744	0.178309	-2.19061	5.58734e-13	7.79276e-11	down
EPHB3	45.7784	13.2321	0.289047	-1.67578	6.08479e-13	8.28448e-11	down
PDYN-AS1	15.6032	1.24302	0.0796642	-2.85545	6.46525e-13	8.74987e-11	down
CTSG	41.7771	2.69034	0.0643974	-2.98769	6.57735e-13	8.84976e-11	down
CEACAM4	370.173	121.918	0.329355	-1.5175	1.02323e-12	1.30509e-10	down
TSEN34	876.923	369.241	0.421064	-1.20637	1.42194e-12	1.73812e-10	down
CEACAM6	35.5739	1.57704	0.0443314	-3.13172	1.548e-12	1.87014e-10	down
SIGLEC7	325.902	127.555	0.39139	-1.30001	1.74218e-12	2.09001e-10	down
CKLF	66.8652	22.0913	0.330386	-1.50352	1.86826e-12	2.19521e-10	down
CNTNAP3C	18.9938	0.505601	0.0266192	-3.24674	1.94804e-12	2.27337e-10	down
ZNF775	101.172	41.0928	0.406168	-1.25051	1.97811e-12	2.30064e-10	down
KIAA0319	29.7724	6.57922	0.220984	-1.96451	2.01556e-12	2.32842e-10	down
CASS4	254.611	109.086	0.428443	-1.1838	2.49232e-12	2.81288e-10	down
AQP9	1975.92	407.202	0.206083	-2.04476	2.50131e-12	2.81377e-10	down
OSM	890.828	170.161	0.191015	-2.12246	2.53299e-12	2.84009e-10	down
NTRK1	45.8285	14.7709	0.322308	-1.55417	2.67589e-12	2.97119e-10	down
TREML2	469.388	159.338	0.339459	-1.4771	2.94412e-12	3.20676e-10	down
HSPA6	1462.46	335.323	0.229287	-1.93054	3.14354e-12	3.35996e-10	down
CEACAM3	566.999	101.605	0.179198	-2.18145	3.48152e-12	3.66414e-10	down
STEAP4	798.641	168.879	0.211458	-2.01489	3.50959e-12	3.6807e-10	down
PHF24	6.59965	0.440325	0.0667195	-2.90945	3.83777e-12	3.90724e-10	down
RNVU1-6	11.9722	1.86363	0.155663	-2.29223	4.11015e-12	4.14762e-10	down
SIGLEC5	41.8966	12.9871	0.309979	-1.58311	4.29547e-12	4.30929e-10	down
HRH4	40.8016	7.98316	0.195658	-2.08323	4.31387e-12	4.31513e-10	down
DUSP1	36147.5	11096.8	0.306986	-1.5984	4.34467e-12	4.3333e-10	down
CLDN9	74.8566	14.5317	0.194127	-2.09787	4.81347e-12	4.7321e-10	down
ITGB8	21.1728	3.57875	0.169026	-2.21316	8.91483e-12	8.15647e-10	down
PNPLA1	31.4714	11.8239	0.375702	-1.34451	9.54474e-12	8.64063e-10	down
KIAA1211L	25.4461	7.09996	0.27902	-1.70052	9.99712e-12	9.02635e-10	down
CSNK1A1L	7.13264	0.41756	0.0585421	-2.90464	1.00556e-11	9.03161e-10	down
LTF	1158.88	59.187	0.0510726	-3.01081	1.03815e-11	9.25882e-10	down
BEST1	589.97	208.402	0.353241	-1.42522	1.05048e-11	9.30608e-10	down
MPO	207.825	57.7432	0.277845	-1.71079	1.09955e-11	9.6732e-10	down
OTX1	13.2134	0.609657	0.0461394	-3.01768	1.11432e-11	9.7781e-10	down
EGR3	633.127	107.777	0.17023	-2.21645	1.16123e-11	1.00865e-09	down
BPI	186.351	31.0507	0.166625	-2.23443	1.27872e-11	1.09957e-09	down
CEACAM1	147.08	44.0449	0.299463	-1.61957	1.34264e-11	1.14877e-09	down
LYPD3	31.8558	11.6856	0.366828	-1.37747	1.54053e-11	1.29232e-09	down
TEX101	6.01746	0.627547	0.104288	-2.56462	1.63022e-11	1.34775e-09	down
NFE4	52.2736	4.49901	0.0860666	-2.73721	1.87513e-11	1.52094e-09	down
CYSTM1	232.729	88.4613	0.380105	-1.33089	2.14458e-11	1.71917e-09	down
C3orf86	110.484	24.332	0.220232	-1.95439	3.35116e-11	2.56076e-09	down
HCAR3	268.925	34.621	0.128739	-2.43844	3.39602e-11	2.58353e-09	down
TMEM272	128.912	47.0683	0.36512	-1.37722	3.46392e-11	2.62936e-09	down
FAM43A	275.505	95.448	0.346447	-1.444	3.49629e-11	2.64224e-09	down
UGT2B11	9.4894	0.955334	0.100674	-2.62618	4.81859e-11	3.46595e-09	down
CSF2RBP1	9.11712	0.144723	0.0158738	-3.1024	4.85964e-11	3.48817e-09	down
RHEX	27.8489	6.68765	0.240141	-1.85542	5.50792e-11	3.88042e-09	down
LILRA4	163.114	38.4008	0.235423	-1.87782	5.65431e-11	3.96727e-09	down
MNDA	8086.1	2622.34	0.324302	-1.52137	7.44079e-11	5.00576e-09	down
NAT8L	26.1595	6.50146	0.248532	-1.80298	9.37761e-11	6.17554e-09	down
PTPRN2	231.963	95.3879	0.411221	-1.22744	1.00481e-10	6.48527e-09	down
ALOX5AP	1615	640.297	0.396469	-1.27456	1.16975e-10	7.3506e-09	down
AFF2	17.2998	5.16509	0.298563	-1.60766	1.17219e-10	7.35246e-09	down
LRFN1	376.939	133.688	0.354667	-1.41224	1.22865e-10	7.62296e-09	down
COL17A1	13.2136	1.92386	0.145598	-2.31385	1.30886e-10	8.01908e-09	down
LILRA2	2043.98	789.896	0.38645	-1.30626	1.35358e-10	8.23431e-09	down
BICDL2	23.5927	0.995886	0.0422116	-2.94286	1.36488e-10	8.28834e-09	down
NECTIN1	306.924	119.196	0.388355	-1.30018	1.44074e-10	8.70276e-09	down
GPR27	217.779	64.1571	0.294597	-1.62757	1.67797e-10	9.90793e-09	down
RAB3D	677.714	256.899	0.379067	-1.32923	1.68068e-10	9.90793e-09	down
DEFA1	20.8183	1.23804	0.0594687	-2.81455	2.3305e-10	1.32603e-08	down
SLC25A37	4348.95	1700.26	0.390958	-1.29033	2.43155e-10	1.37441e-08	down
CD34	14.8502	3.81019	0.256574	-1.78137	3.18577e-10	1.76297e-08	down
CCNJL	259.18	74.6147	0.287887	-1.65139	3.42143e-10	1.86926e-08	down
NLRP12	722.886	276.015	0.381824	-1.31802	3.44194e-10	1.87747e-08	down
FOS	35713.3	11304.2	0.316527	-1.54201	3.6342e-10	1.95377e-08	down
ZNF835	22.4199	7.708	0.343802	-1.43207	3.87218e-10	2.06617e-08	down
ENTPD2	14.6046	1.85015	0.126683	-2.39331	4.87537e-10	2.53967e-08	down
DPEP3	108.243	34.9036	0.322456	-1.5192	5.52164e-10	2.82757e-08	down
FAM83F	10.4438	2.13072	0.204018	-1.99066	5.80023e-10	2.93952e-08	down
TRIB1	2629.57	935.457	0.355745	-1.40238	5.82834e-10	2.94941e-08	down
CDH2	7.1092	1.08967	0.153276	-2.2257	7.48299e-10	3.66773e-08	down
P2RY13	978.329	413.486	0.422645	-1.18942	7.54142e-10	3.68584e-08	down
HAL	441.104	180.833	0.409955	-1.22668	8.87679e-10	4.23009e-08	down
RASGRP4	2534.85	1048.76	0.413736	-1.21562	9.37185e-10	4.42904e-08	down
BASP1-AS1	4.12633	0.291269	0.0705879	-2.59006	1.19389e-09	5.47127e-08	down
PACERR	6.75875	0.696422	0.10304	-2.48093	1.19599e-09	5.47127e-08	down
IL1R1	123.94	41.2513	0.332834	-1.47504	1.23966e-09	5.65593e-08	down
DLEU7	36.0693	15.3325	0.425086	-1.18046	1.29815e-09	5.89928e-08	down
PROK2	711.209	167.85	0.236007	-1.84745	1.33182e-09	6.02038e-08	down
GHRL	77.0954	32.0329	0.415497	-1.20686	1.39282e-09	6.23858e-08	down
PROC	16.904	6.88961	0.407573	-1.2097	1.62623e-09	7.12591e-08	down
FLT1P1	4.53481	0.187971	0.0414508	-2.71866	1.68652e-09	7.3339e-08	down
ACSS3	7.33341	1.00572	0.137142	-2.29338	1.89009e-09	8.04661e-08	down
RPH3A	174.765	50.7375	0.290319	-1.62653	2.13711e-09	8.9482e-08	down
CD248	118.189	37.8664	0.320389	-1.51654	2.3149e-09	9.58071e-08	down
LGALS9C	102.14	34.2896	0.335713	-1.45879	2.41845e-09	9.88999e-08	down
PTGDR2	137.352	40.8713	0.297566	-1.59776	2.59169e-09	1.05108e-07	down
ABTB1	6619.44	2735.06	0.413186	-1.21423	2.62761e-09	1.06188e-07	down
MYBPH	14.4059	1.7222	0.119548	-2.37233	2.68323e-09	1.078e-07	down
IL1RN	1049.05	353.044	0.336537	-1.45984	2.7685e-09	1.10837e-07	down
ARAP3	1119.87	468.282	0.418159	-1.19866	3.33618e-09	1.30966e-07	down
NHLRC4	42.0827	16.5392	0.393016	-1.2686	4.01111e-09	1.5276e-07	down
CSF3R	26482.5	9274.09	0.350197	-1.41169	4.19584e-09	1.59071e-07	down
TMEM252	4.66713	0.507212	0.108677	-2.36434	4.25947e-09	1.6095e-07	down
DAPK2	354.252	143.092	0.403926	-1.23925	4.5384e-09	1.6985e-07	down
SCARA5	7.68499	1.81549	0.236238	-1.80932	4.79409e-09	1.77247e-07	down
QPCT	564.061	189.339	0.335671	-1.45956	4.81592e-09	1.77671e-07	down
CDA	870.908	301.981	0.346742	-1.42207	5.26315e-09	1.9272e-07	down
NOG	217.285	51.0217	0.234814	-1.83524	5.42815e-09	1.97288e-07	down
S1PR4	2828.68	1067.23	0.377289	-1.32197	5.76321e-09	2.08105e-07	down
TNF	1104.22	352.93	0.319618	-1.51439	5.80751e-09	2.09302e-07	down
COL18A1	1510.78	525.922	0.348113	-1.41647	6.10318e-09	2.18809e-07	down
CCL4L2	466.394	115.682	0.248035	-1.78031	6.6429e-09	2.34002e-07	down
CRISP3	42.171	2.94469	0.0698274	-2.59861	7.94205e-09	2.716e-07	down
PANX2	252.4	55.9059	0.221498	-1.88571	8.32831e-09	2.82107e-07	down
MYCL	473.179	180.476	0.381411	-1.3066	8.40322e-09	2.84054e-07	down
TNFSF14	252.126	106.203	0.42123	-1.18501	9.18392e-09	3.07415e-07	down
CA4	100.826	4.95344	0.0491288	-2.6812	9.24591e-09	3.08887e-07	down
RHOB	5249.34	2218.32	0.42259	-1.18209	9.60118e-09	3.1797e-07	down
DUSP13	3.63716	0.350045	0.0962414	-2.47246	9.64106e-09	3.18982e-07	down
CCNA1	11.6851	1.77841	0.152194	-2.1738	9.94113e-09	3.26393e-07	down
FUT7	343.689	132.919	0.386743	-1.28942	1.03515e-08	3.37927e-07	down
IL1R2	292.116	47.6791	0.16322	-2.13645	1.07614e-08	3.49644e-07	down
TRIM64B	10.0031	0.574861	0.0574685	-2.62109	1.08033e-08	3.50673e-07	down
ITGB4	38.6075	15.1072	0.391301	-1.26575	1.2159e-08	3.87349e-07	down
SLC45A3	279.999	101.069	0.360962	-1.37301	1.21724e-08	3.87417e-07	down
SYT2	27.9621	11.1059	0.397178	-1.24426	1.3632e-08	4.2831e-07	down
NFAM1	5637.02	2289.8	0.406207	-1.22918	1.40407e-08	4.38739e-07	down
IL4	9.13226	2.06837	0.226491	-1.85529	1.41458e-08	4.41621e-07	down
CLEC4E	924.428	395.279	0.427593	-1.16572	1.47193e-08	4.58276e-07	down
TSPEAR	8.56109	1.10718	0.129328	-2.26317	1.5732e-08	4.85838e-07	down
SLC12A1	67.8598	6.99599	0.103095	-2.40991	1.59521e-08	4.9219e-07	down
COLEC12	7.54584	1.46787	0.194527	-1.9855	1.60149e-08	4.93686e-07	down
SDK1	8.16121	2.23863	0.274301	-1.66556	1.81184e-08	5.49641e-07	down
CACNA1E	39.3421	5.88181	0.149504	-2.18037	1.82686e-08	5.53706e-07	down
GATA2	852.722	210.807	0.247216	-1.77035	1.96884e-08	5.9048e-07	down
MIR3945HG	23.601	4.5165	0.191369	-1.98862	1.97137e-08	5.90724e-07	down
MAGOH3P	2.87025	0.269368	0.0938481	-2.34627	2.11762e-08	6.25263e-07	down
RNU5E-4P	7.37614	1.37797	0.186815	-2.01707	2.22155e-08	6.50354e-07	down
ELANE	115.118	19.552	0.169843	-2.08833	2.50703e-08	7.24652e-07	down
SUMO1P1	10.862	2.81276	0.258955	-1.7068	2.6675e-08	7.66514e-07	down
ARHGEF4	59.3053	23.2573	0.392162	-1.2704	2.73708e-08	7.84539e-07	down
DHRS9	166.805	52.2562	0.313277	-1.52053	3.34839e-08	9.291e-07	down
C4BPA	63.861	2.66937	0.0417997	-2.61393	3.38309e-08	9.34571e-07	down
KRT81	13.416	2.67342	0.199271	-1.94378	3.56034e-08	9.74901e-07	down
RF00017	124.061	40.7397	0.328385	-1.4705	3.72541e-08	1.00963e-06	down
KCNA5	5.51243	1.26291	0.229102	-1.80738	3.89093e-08	1.04622e-06	down
RPL12P27	11.9107	3.28696	0.275967	-1.64915	3.92704e-08	1.05345e-06	down
SFN	52.6543	15.9785	0.30346	-1.55107	4.13929e-08	1.10007e-06	down
CD177	58.5286	5.15765	0.088122	-2.42344	5.25653e-08	1.35909e-06	down
IL1B	1690.01	407.36	0.24104	-1.77677	6.32457e-08	1.605e-06	down
DLGAP1-AS3	6.19843	1.51119	0.243801	-1.76497	6.78298e-08	1.70609e-06	down
KRT17P2	36.6538	15.1222	0.412569	-1.19634	6.84554e-08	1.7168e-06	down
AATK	844.987	267.068	0.316061	-1.50619	7.18894e-08	1.79253e-06	down
HECW2	31.7659	11.581	0.364574	-1.34038	7.47599e-08	1.85199e-06	down
ADAMTS7P1	34.72	13.4501	0.387388	-1.28378	7.51992e-08	1.86153e-06	down
STAC2	2.67817	0.369861	0.138102	-2.18091	8.14009e-08	1.98216e-06	down
KCNJ2	132.365	39.4725	0.298208	-1.56465	8.22616e-08	1.99463e-06	down
CYP4F3	648.83	64.5994	0.0995628	-2.35485	8.56116e-08	2.06564e-06	down
KCNB1	11.2117	3.22715	0.287839	-1.58959	8.70252e-08	2.09239e-06	down
CD200R1L	3.61643	0.304474	0.0841921	-2.35859	8.74257e-08	2.10054e-06	down
MMP15	21.9887	8.87941	0.403816	-1.21765	9.0115e-08	2.1501e-06	down
BTNL3	60.4598	1.09838	0.0181671	-2.53416	9.31826e-08	2.21559e-06	down
DEFA4	75.229	5.19134	0.0690072	-2.46257	1.00915e-07	2.37151e-06	down
HPGDS	7.55848	2.58372	0.341831	-1.40266	1.19771e-07	2.74689e-06	down
GUCY2D	17.479	6.32801	0.362035	-1.34582	1.35251e-07	3.05696e-06	down
GRIN1	11.6347	3.18538	0.273783	-1.64545	1.3815e-07	3.10611e-06	down
CLEC9A	25.0327	7.3332	0.292945	-1.57695	1.73741e-07	3.81142e-06	down
DRAXIN	95.2252	39.1184	0.410799	-1.20597	1.75515e-07	3.84051e-06	down
ALG1L13P	16.6736	7.12554	0.427354	-1.13537	1.80961e-07	3.94207e-06	down
FCAR	653.622	233.287	0.356913	-1.36442	2.07118e-07	4.41105e-06	down
SPINK2	17.1318	6.50723	0.379834	-1.29717	2.08115e-07	4.4268e-06	down
EIF3LP2	4.64358	1.1731	0.252629	-1.72923	2.35132e-07	4.92515e-06	down
CRISPLD2	656.558	267.529	0.407472	-1.21174	2.43336e-07	5.07221e-06	down
CXCL2	351.442	84.4644	0.240337	-1.75584	2.56299e-07	5.31336e-06	down
LRRC26	10.7435	2.51601	0.234188	-1.75741	2.87336e-07	5.86466e-06	down
CCL3	874.243	221.866	0.25378	-1.70362	3.14706e-07	6.31807e-06	down
AOC1	11.779	0.865785	0.0735023	-2.36405	3.201e-07	6.40387e-06	down
TRPV5	5.66819	1.22373	0.215895	-1.81509	3.20669e-07	6.4115e-06	down
OR6N1	4.61222	0.360512	0.0781646	-2.31835	3.42643e-07	6.79543e-06	down
PPARGC1A	3.01856	0.526798	0.17452	-1.97748	3.45268e-07	6.83169e-06	down
RARA-AS1	156.871	67.1093	0.427799	-1.15339	3.50979e-07	6.90884e-06	down
CHIT1	28.6839	10.9143	0.380503	-1.28884	3.57124e-07	7.00168e-06	down
MMP28	41.2205	16.6525	0.403985	-1.21641	3.5783e-07	7.01151e-06	down
ADORA1	9.5902	2.55554	0.266474	-1.63711	3.61646e-07	7.08223e-06	down
REG4	19.3641	6.55136	0.338325	-1.41389	4.291e-07	8.26638e-06	down
RNU6-176P	4.94634	1.12374	0.227186	-1.80395	4.46262e-07	8.53469e-06	down
MAP3K15	6.59009	2.06068	0.312695	-1.48181	4.47552e-07	8.55461e-06	down
TSPAN16	25.356	8.11508	0.320046	-1.47791	4.7544e-07	9.02232e-06	down
KAZN	19.5466	5.02212	0.256931	-1.69107	4.78007e-07	9.06101e-06	down
ROPN1L	63.7358	22.8531	0.35856	-1.35378	5.10978e-07	9.59063e-06	down
CUX2	29.1081	12.3652	0.424803	-1.15533	5.24046e-07	9.80373e-06	down
PLIN4	192.465	58.1664	0.302219	-1.52766	6.25916e-07	1.1521e-05	down
MIR5684	4.44377	0.842809	0.189661	-1.90612	6.91354e-07	1.25505e-05	down
LIN7A	189.534	79.5273	0.419593	-1.17042	7.20363e-07	1.30014e-05	down
C10orf105	50.0446	18.3489	0.36665	-1.32227	7.43088e-07	1.33623e-05	down
ORM1	29.5759	7.11194	0.240464	-1.72753	7.91028e-07	1.40915e-05	down
CMTM1	44.1303	17.8107	0.403593	-1.20837	8.38247e-07	1.48478e-05	down
SLC46A2	188.246	73.883	0.39248	-1.24496	9.89471e-07	1.6992e-05	down
FABP6	4.8131	0.701381	0.145723	-2.06283	9.93594e-07	1.70536e-05	down
ALOX15	10.4254	2.0994	0.201373	-1.87035	1.00028e-06	1.71342e-05	down
SMOC1	4.38416	1.30486	0.29763	-1.52278	1.01941e-06	1.74183e-05	down
DSG3	2.31923	0.0577317	0.0248927	-2.25403	1.10987e-06	1.87676e-05	down
BMX	14.2838	1.62552	0.113802	-2.16252	1.12593e-06	1.89831e-05	down
AJAP1	7.70439	2.14418	0.278307	-1.58585	1.13292e-06	1.90822e-05	down
PRDM5	20.5638	6.09709	0.296496	-1.53569	1.1634e-06	1.94999e-05	down
PRSS33	13.1398	2.31002	0.175803	-1.93385	1.38562e-06	2.25675e-05	down
GPC3	2.81359	0.608418	0.216243	-1.75419	1.38505e-06	2.25675e-05	down
BFSP2-AS1	4.98092	1.43628	0.288356	-1.54103	1.39497e-06	2.26724e-05	down
PKDCC	5.22727	1.21754	0.232921	-1.70963	1.47704e-06	2.37587e-05	down
FAM157A	460.55	196.995	0.427738	-1.14366	1.62147e-06	2.55782e-05	down
MFSD6L	18.1739	6.73596	0.37064	-1.29928	1.62632e-06	2.56311e-05	down
CEACAM8	73.0776	6.74814	0.0923422	-2.2072	1.7172e-06	2.68292e-05	down
ADAMTS5	35.8042	8.51567	0.23784	-1.72105	1.82209e-06	2.81984e-05	down
RIPK4	4.45946	1.21371	0.272164	-1.6071	1.90954e-06	2.93927e-05	down
KCNH7	9.29273	2.18084	0.234682	-1.70565	2.18937e-06	3.30331e-05	down
ARL4AP2	2.58039	0.29175	0.113064	-2.06644	2.20318e-06	3.3154e-05	down
KL	8.65444	2.78626	0.321945	-1.44983	2.22499e-06	3.34382e-05	down
LRRN3	214.119	82.9253	0.387286	-1.25341	2.34028e-06	3.49565e-05	down
CXCL6	8.76433	1.41788	0.161779	-1.96426	2.46189e-06	3.64247e-05	down
SLC12A5-AS1	5.97458	0.777613	0.130154	-2.0442	2.49426e-06	3.68248e-05	down
GNG12-AS1	7.84181	2.23519	0.285035	-1.55691	2.58019e-06	3.78327e-05	down
LIMD1-AS1	9.44286	3.90373	0.413405	-1.19274	2.85326e-06	4.12839e-05	down
EGR2	436.501	131.145	0.300445	-1.50919	2.99937e-06	4.30399e-05	down
OR6K3	2.38581	0.286097	0.119916	-2.02341	3.18896e-06	4.55508e-05	down
FXYD6	85.5552	36.7712	0.429796	-1.13172	3.31232e-06	4.69897e-05	down
DEFA3	1047.33	88.3373	0.0843452	-2.17738	3.38213e-06	4.77927e-05	down
S100A9	49893.5	19327.1	0.387367	-1.24948	3.64718e-06	5.11799e-05	down
FZD8	11.5316	4.6041	0.399258	-1.21306	3.72666e-06	5.21034e-05	down
PMP22	16.3172	6.05401	0.37102	-1.30479	3.78873e-06	5.28851e-05	down
RPS23P10	2.79407	0.311643	0.111537	-2.05535	4.03453e-06	5.57715e-05	down
TMEM92	4.30905	0.577465	0.134012	-2.00701	4.11464e-06	5.66733e-05	down
INSC	3.41714	0.911736	0.266813	-1.57571	4.18117e-06	5.74743e-05	down
PRSS22	18.6808	6.8554	0.366975	-1.31133	4.19917e-06	5.76755e-05	down
LUNAR1	8.82318	2.16682	0.245583	-1.65923	4.34507e-06	5.93866e-05	down
MIR657	2.20073	0.284168	0.129124	-1.9952	4.5272e-06	6.13218e-05	down
SLC7A3	7.94326	1.64322	0.20687	-1.78422	4.6595e-06	6.29895e-05	down
KCNJ2-AS1	18.0637	6.0575	0.335341	-1.38105	4.7672e-06	6.4243e-05	down
PRSS35	4.1556	0.880025	0.211768	-1.77534	4.90833e-06	6.58604e-05	down
RIMBP3	11.128	4.46187	0.400959	-1.19161	5.33438e-06	7.07202e-05	down
KRT86	14.2862	4.33024	0.303106	-1.47843	5.57392e-06	7.33287e-05	down
PCOLCE2	2.81551	0.205617	0.0730301	-2.1099	5.58265e-06	7.34154e-05	down
CTBP2P8	3.07353	0.647921	0.210807	-1.76295	5.96227e-06	7.75751e-05	down
PPP1R27	9.32727	2.17016	0.232669	-1.71198	6.01502e-06	7.82021e-05	down
SLC22A1	20.184	7.98279	0.395501	-1.21694	6.27364e-06	8.08901e-05	down
IFIT2	1487.14	519.795	0.349525	-1.35097	6.32158e-06	8.14165e-05	down
CYP4F2	1.75578	0.268989	0.153202	-1.86284	6.72783e-06	8.5843e-05	down
RNF224	10.5921	4.04747	0.382123	-1.25372	6.95832e-06	8.8455e-05	down
DNASE1L3	37.3469	15.278	0.409084	-1.18136	7.27113e-06	9.20903e-05	down
SCGB3A2	13.3092	3.81041	0.2863	-1.54499	7.42715e-06	9.36332e-05	down
LYVE1	7.59943	2.30171	0.302879	-1.48811	7.71652e-06	9.65902e-05	down
RAB7B	6.38042	2.37612	0.372407	-1.26948	8.02772e-06	9.99025e-05	down
TPSP2	1.77747	0.0621185	0.0349477	-2.03085	9.40436e-06	0.000114516	down
MIR425	2.83116	0.524668	0.185319	-1.82589	9.63524e-06	0.000116691	down
PRTN3	26.6736	3.3497	0.125581	-2.00395	1.00194e-05	0.000120367	down
TEX54	2.80932	0.695831	0.247687	-1.60382	1.04278e-05	0.000124531	down
AOC4P	3.88622	0.772478	0.198774	-1.76512	1.09031e-05	0.000129449	down
FBXL13	18.0366	7.47115	0.414222	-1.16337	1.09735e-05	0.000130097	down
TFF3	2.94474	0.426088	0.144694	-1.90613	1.15727e-05	0.000136072	down
GGT5	13.264	4.48569	0.338186	-1.36741	1.24104e-05	0.000144487	down
HTRA3	5.74865	1.14633	0.199409	-1.77135	1.2732e-05	0.00014763	down
ST5	25.5336	10.1301	0.396736	-1.2135	1.28156e-05	0.000148348	down
PCDH1	73.8121	31.0445	0.420588	-1.14539	1.30489e-05	0.000150776	down
DYSF	2320.26	954.998	0.411591	-1.17026	1.34875e-05	0.000155183	down
CNTNAP3P2	1.85373	0.0934466	0.0504101	-1.97819	1.59312e-05	0.000178744	down
MTCO3P5	4.03856	0.192889	0.0477619	-2.05655	1.6094e-05	0.000180335	down
SIGLEC8	2.68574	0.151911	0.0565619	-2.04049	1.62948e-05	0.000182168	down
UBE2Q2P9	7.14471	2.45904	0.344176	-1.33522	1.70464e-05	0.000189153	down
FAM110C	19.6165	8.26912	0.421539	-1.1231	1.81315e-05	0.00019958	down
NXPH4	34.4476	14.6669	0.425775	-1.13122	1.82132e-05	0.000200351	down
KREMEN1	155.793	43.1704	0.277101	-1.53915	1.95017e-05	0.000211943	down
PTENP1-AS	2.34897	0.607595	0.258664	-1.62178	1.98493e-05	0.000214836	down
COL13A1	30.5969	10.0732	0.329223	-1.38913	2.00194e-05	0.000216074	down
GAS1	14.7632	5.83879	0.395496	-1.20406	2.08789e-05	0.000223442	down
HEY1	6.53263	1.71656	0.262767	-1.5689	2.21369e-05	0.000234709	down
RHPN1-AS1	2.73444	0.805068	0.294418	-1.48621	2.22241e-05	0.000235488	down
CIDEB	5.39657	1.64517	0.304855	-1.43869	2.28226e-05	0.000240715	down
SHD	28.6238	12.3252	0.430594	-1.11017	2.30192e-05	0.00024249	down
CLEC5A	126.363	52.8347	0.418119	-1.14731	2.38621e-05	0.000249806	down
RNU5D-1	10.2951	3.08692	0.299843	-1.47077	2.39113e-05	0.000250044	down
HNRNPA1P52	7.27052	0.961108	0.132192	-1.91508	2.41525e-05	0.000252183	down
CCL3L1	1573.51	450.1	0.286049	-1.50829	2.42094e-05	0.000252547	down
NRCAM	42.5632	16.3932	0.385149	-1.23616	2.48153e-05	0.000258161	down
SCT	30.2267	12.2616	0.405654	-1.17873	2.62396e-05	0.000270762	down
IL5RA	40.1928	16.3419	0.406588	-1.16942	2.70212e-05	0.000277906	down
HTR6	8.06803	3.09178	0.383214	-1.22814	2.78146e-05	0.000285298	down
NCF4-AS1	10.2609	3.67301	0.35796	-1.29881	3.09868e-05	0.000312693	down
RNU4ATAC	13.0625	4.2898	0.328404	-1.39097	3.2551e-05	0.000326175	down
MAP1LC3A	216.422	89.2954	0.412599	-1.15801	3.2891e-05	0.00032891	down
MIR7845	8.03364	2.71185	0.337562	-1.35794	3.66216e-05	0.000360128	down
CIB3	10.6013	3.77481	0.35607	-1.28419	4.66416e-05	0.00043992	down
CLEC4C	40.3221	17.3285	0.429752	-1.10455	4.80425e-05	0.000450196	down
ADAMTSL2	8.03958	2.98587	0.371396	-1.27569	5.34626e-05	0.000492563	down
TACSTD2	8.4478	2.40562	0.284763	-1.50294	5.54256e-05	0.000507513	down
CAPNS2	12.8642	4.62482	0.359511	-1.27445	5.81065e-05	0.000529377	down
DCN	1.72415	0.115412	0.0669385	-1.86084	5.81956e-05	0.000530048	down
AZU1	157.235	57.0683	0.362949	-1.27994	5.89979e-05	0.000535791	down
RNU6-2	3.77207	1.28923	0.341783	-1.3178	6.14632e-05	0.000554364	down
ASIP	4.11016	1.39026	0.338249	-1.29252	6.40326e-05	0.000575271	down
SLC16A2	2.26941	0.565694	0.249269	-1.53767	6.52354e-05	0.000584394	down
SULT1A2	25.3193	9.90316	0.391131	-1.20288	6.59933e-05	0.000590412	down
TMEM92-AS1	2.40357	0.425804	0.177155	-1.72776	7.33776e-05	0.000644378	down
EMID1	9.36767	3.85578	0.411605	-1.141	7.45251e-05	0.000652951	down
OOSP3	1.95054	0.248859	0.127585	-1.77073	7.84571e-05	0.000681657	down
TRIM49D1	2.04834	0.0717206	0.035014	-1.87104	8.19186e-05	0.000706543	down
EVPL	21.8078	9.16015	0.42004	-1.13619	8.20242e-05	0.000707225	down
SIRPB3P	5.74394	2.42044	0.421391	-1.09852	8.25155e-05	0.000710903	down
ARPP21	1.49945	0.241004	0.160728	-1.67802	9.19694e-05	0.000779899	down
RNU4-2	5.88488	1.53125	0.260201	-1.52434	9.33901e-05	0.000789994	down
MGAM2	11.4596	2.31149	0.201708	-1.67089	9.45179e-05	0.00079796	down
TRBV6-4	10.6551	4.20803	0.394931	-1.17654	9.71984e-05	0.000817561	down
TERB2	1.85566	0.0434437	0.0234114	-1.84552	9.79646e-05	0.000823008	down
KRT8P42	3.6909	0.79613	0.215701	-1.63192	9.87434e-05	0.000828092	down
MYO16-AS1	2.28802	0.240103	0.104939	-1.81266	0.000107778	0.000891696	down
IFNL1	4.77074	1.99387	0.417937	-1.11219	0.000114804	0.000943453	down
EPHA2	38.8424	15.6488	0.402878	-1.16478	0.000116067	0.000952465	down
TAS2R40	2.21088	0.230752	0.104371	-1.78908	0.000118691	0.000969128	down
MIR3677	5.62396	2.40242	0.427176	-1.08773	0.000119741	0.000975846	down
GAL3ST1	5.26043	2.07918	0.395249	-1.1736	0.000123116	0.000997594	down
SMG1P6	11.678	23.4702	2.00977	0.930995	7.61011e-05	0.000663372	up
MEIOC	7.46835	15.0519	2.01543	0.932386	9.8334e-05	0.000825909	up
ZNF331	335.806	672.589	2.00291	0.939579	4.14801e-05	0.000398762	up
MEST	48.3196	96.96	2.00664	0.94258	2.08111e-05	0.000222814	up
RPL32P1	68.381	136.925	2.00238	0.94823	6.68824e-06	8.54013e-05	up
AP4B1-AS1	25.8648	51.7694	2.00154	0.949892	2.01609e-06	3.07294e-05	up
ZBTB10	224.851	451.782	2.00924	0.955473	4.3504e-06	5.93961e-05	up
MYO1B	12.1529	24.7571	2.03714	0.960006	3.86344e-05	0.000376148	up
DIRAS1	38.1499	77.7704	2.03855	0.961291	2.17728e-05	0.000231277	up
IGHEP2	19.9259	40.9092	2.05306	0.96206	6.18209e-05	0.000557444	up
CD38	490.963	993.482	2.02354	0.962965	6.59924e-06	8.45797e-05	up
TJP2	20.5606	41.5071	2.01877	0.963139	3.1074e-07	6.24941e-06	up
EBF1	71.1512	144.955	2.03728	0.964235	1.76185e-05	0.000194871	up
EDA	23.3013	47.305	2.03014	0.965431	2.69261e-06	3.91788e-05	up
NAP1L5	53.3607	107.721	2.01873	0.972021	1.47199e-07	3.28801e-06	up
PIK3R1	1482.93	3028.75	2.0424	0.973184	7.57204e-06	9.50592e-05	up
CEP290	235.248	477.509	2.02981	0.974059	9.35257e-07	1.62887e-05	up
SVIP	463.71	947.511	2.04332	0.974135	6.51606e-06	8.37012e-05	up
ODF2L	628.703	1259.28	2.00299	0.978	1.63865e-11	1.34825e-09	up
SHLD3	64.1731	128.968	2.00969	0.978166	6.07971e-10	3.05858e-08	up
FANCI	141.823	285.874	2.01571	0.979822	3.95608e-09	1.51151e-07	up
ARAP2	1082.48	2183.53	2.01716	0.979902	4.75377e-09	1.76136e-07	up
TWF1	419.25	842.944	2.0106	0.982741	2.29953e-11	1.82632e-09	up
BRIP1	26.4347	53.9652	2.04145	0.983101	1.19618e-06	1.99907e-05	up
MED4-AS1	6.4932	13.8004	2.12536	0.983442	0.000117223	0.000960114	up
OPA1	752.23	1523.29	2.02503	0.983546	8.61865e-09	2.90477e-07	up
OST4	2621.7	5454.26	2.08043	0.984631	4.0076e-05	0.000387763	up
MIER3	216.707	437.018	2.01663	0.98639	1.59558e-11	1.32874e-09	up
TPM4	3303.07	6789.02	2.05536	0.987313	1.92022e-06	2.94978e-05	up
MOXD1	14.9549	30.9937	2.07248	0.98738	4.70178e-05	0.000442331	up
MSC-AS1	17.1108	35.5332	2.07665	0.98811	5.31133e-06	7.05231e-05	up
RABGGTB	1140.96	2289.72	2.00684	0.988191	2.79288e-16	9.58235e-14	up
FANCL	116.366	233.201	2.00403	0.989039	1.45884e-22	1.47214e-19	up
C12orf76	291.074	602.308	2.06926	0.989731	5.91995e-06	7.71707e-05	up
CNST	633.028	1283.82	2.02807	0.991726	1.64258e-10	9.78416e-09	up
MT-ND6	25843.9	54156.4	2.09552	0.991786	4.69071e-05	0.000441528	up
DHX15	1361.17	2756.39	2.02501	0.992052	3.05269e-11	2.36428e-09	up
ZGRF1	99.3525	201.952	2.03268	0.993031	2.14042e-10	1.23011e-08	up
CD109	28.7317	60.0243	2.08913	0.993267	1.36223e-05	0.000156471	up
HECTD2	27.2291	56.2412	2.06548	0.994597	7.98311e-07	1.42138e-05	up
DUSP10	150.373	312.861	2.08056	0.994891	6.82329e-06	8.69318e-05	up
CTSL	203.794	419.428	2.05809	0.995613	3.47828e-07	6.86266e-06	up
CCDC141	21.4807	45.5742	2.12163	0.99627	0.000109863	0.000907637	up
ZNF292	765.644	1561.76	2.0398	0.996373	1.41342e-09	6.31439e-08	up
TIPARP	397.854	817.83	2.0556	0.997026	1.12916e-07	2.6159e-06	up
FAM160B1	466.513	951.445	2.03948	0.999967	9.90329e-11	6.42098e-09	up
IFI27	32.4377	1608.61	49.5906	4.11797	6.04121e-25	9.87018e-22	up
MINDY3	188.52	405.478	2.15085	1.08709	2.8557e-21	2.51228e-18	up
TRIM22	4573.81	9293.41	2.03188	1.0088	7.87458e-20	6.00393e-17	up
KNTC1	251.747	527.964	2.09721	1.05079	1.5941e-18	9.94431e-16	up
PGAP1	76.3286	256.009	3.35404	1.66762	8.327e-18	4.76165e-15	up
IL15	274.815	588.969	2.14314	1.07909	9.16776e-18	5.07332e-15	up
IFI44	1226.38	5164.84	4.21144	1.94661	1.29449e-17	6.68219e-15	up
RINT1	169.59	373.786	2.20406	1.11571	2.04879e-17	9.62934e-15	up
MT-TC	1240	4965.79	4.00465	1.88314	3.88213e-17	1.68602e-14	up
APOL6	1772.05	3875.13	2.18681	1.10643	7.87107e-17	3.25369e-14	up
CMAHP	266.511	588.4	2.20779	1.11805	9.95232e-17	3.88028e-14	up
ARHGAP21	477.617	1291.16	2.70335	1.38822	1.07799e-16	4.1557e-14	up
BTG3	97.836	316.445	3.23444	1.61768	1.48979e-16	5.49621e-14	up
BARD1	78.7872	166.3	2.11075	1.05512	1.59752e-16	5.76955e-14	up
GEN1	183.587	378.084	2.05943	1.02353	1.82191e-16	6.51142e-14	up
HIST1H2BO	22.7577	398.433	17.5076	3.17118	2.99025e-16	9.87601e-14	up
IFI44L	953.877	5899.33	6.18458	2.35074	4.65923e-16	1.48017e-13	up
OTOF	122.139	1520.9	12.4521	2.93779	9.00439e-16	2.73399e-13	up
FAM81B	6.37818	49.8068	7.80893	2.5622	9.64006e-16	2.90132e-13	up
RN7SL834P	28.278	91.2421	3.22661	1.60642	9.89121e-16	2.93385e-13	up
MCOLN2	258.26	658.915	2.55136	1.30933	1.4897e-15	4.18948e-13	up
MYO3B	9.19556	45.8668	4.98793	2.1057	3.03364e-15	7.88515e-13	up
NDUFV2	62.1542	264.847	4.26113	1.93753	3.079e-15	7.9429e-13	up
XK	71.8321	615.441	8.56777	2.62867	4.34922e-15	1.11359e-12	up
MAP4K5	413.326	847.225	2.04978	1.01463	7.05018e-15	1.69155e-12	up
STARD4	310.398	654.719	2.10929	1.05348	8.42606e-15	1.92732e-12	up
WDFY1	708.613	1452.97	2.05044	1.01523	1.69682e-14	3.70815e-12	up
TRIM13	270.316	583.751	2.15951	1.08423	1.99816e-14	4.25543e-12	up
C1QC	17.6517	156.191	8.84854	2.63362	2.00927e-14	4.25543e-12	up
FAM225A	9.29212	44.944	4.83679	2.06583	3.01298e-14	6.14482e-12	up
MT-ND4L	12823.6	46679.3	3.6401	1.74691	3.09984e-14	6.25621e-12	up
DBF4	157.248	422.529	2.68702	1.37173	3.41101e-14	6.80418e-12	up
HIST1H4H	111.95	1284.67	11.4754	2.81355	3.57797e-14	7.09597e-12	up
STRIP2	20.2575	56.7785	2.80284	1.41913	5.27858e-14	1.01746e-11	up
ARPC3P1	6.9652	24.2654	3.4838	1.69588	5.51524e-14	1.05127e-11	up
NDUFAF5	145.774	315.816	2.16648	1.08699	5.85041e-14	1.09687e-11	up
YOD1	338.549	820.174	2.42261	1.23651	6.0548e-14	1.11688e-11	up
HIST1H2BH	79.7247	557.543	6.99336	2.41628	8.90007e-14	1.61567e-11	up
OR2B6	12.6076	191.603	15.1974	2.95519	9.77635e-14	1.75616e-11	up
DDX47	90.7181	275.871	3.04096	1.52321	1.51673e-13	2.64158e-11	up
RIOK3	1325.38	2743.99	2.07033	1.02658	1.70924e-13	2.86069e-11	up
ARID2	337.399	708.469	2.09979	1.04515	1.81138e-13	2.99331e-11	up
NEXN	103.998	612.62	5.89068	2.25062	1.81466e-13	2.99331e-11	up
HIST1H2BN	39.4112	231.334	5.86976	2.24604	2.03104e-13	3.30261e-11	up
ATAD2	189.128	456.947	2.41607	1.23069	3.18094e-13	4.87223e-11	up
MEIS1	99.4825	455.859	4.5823	1.99288	3.15602e-13	4.87223e-11	up
ZNF484	63.7718	172.444	2.70407	1.37354	3.82888e-13	5.71169e-11	up
GBP1P1	13.2611	68.963	5.20039	2.1222	4.48369e-13	6.51845e-11	up
PSMA6	90.7117	191.947	2.11601	1.05251	4.86861e-13	6.9892e-11	up
BRCA2	48.2197	132.736	2.75273	1.39709	5.7435e-13	7.91404e-11	up
C2orf88	574.858	2766.46	4.81241	2.04005	5.72418e-13	7.91404e-11	up
SRSF10	1779.24	3747.2	2.10607	1.04869	5.80995e-13	7.97357e-11	up
CENPU	32.363	105.593	3.26277	1.60751	6.47761e-13	8.74987e-11	up
CTNNAL1	36.4494	151.306	4.15113	1.88019	6.81741e-13	9.0661e-11	up
SREK1	1188.65	2640.27	2.22123	1.11916	8.12239e-13	1.06774e-10	up
MT-TP	368.363	1384.49	3.75849	1.76955	8.15434e-13	1.06784e-10	up
ZNF367	112.012	253.631	2.26432	1.14299	9.56242e-13	1.2242e-10	up
MT-ATP8	1829.24	9123.55	4.98763	2.06986	1.27589e-12	1.58608e-10	up
PKHD1L1	42.2288	219.57	5.19953	2.10918	1.39797e-12	1.71916e-10	up
SLF1	109.163	224.741	2.05876	1.01643	1.81136e-12	2.15044e-10	up
GRB14	19.0132	88.0348	4.6302	1.98889	2.05661e-12	2.36786e-10	up
ERMN	200.111	520.785	2.60248	1.32236	2.10285e-12	2.41301e-10	up
RSRC2	1287.33	2685.13	2.08582	1.03423	2.55607e-12	2.85664e-10	up
XIRP2	3.27313	24.986	7.63369	2.43707	2.5697e-12	2.86255e-10	up
P2RY12	55.7528	272.369	4.88531	2.04105	2.78864e-12	3.05682e-10	up
UTP15	183.467	382.512	2.08491	1.03223	3.00504e-12	3.26275e-10	up
MMD	951.985	3556.33	3.7357	1.75587	3.05342e-12	3.29443e-10	up
IL12A	25.5191	55.7355	2.18408	1.09839	3.24777e-12	3.46059e-10	up
FRMD3	140.632	522.418	3.71479	1.74839	3.53396e-12	3.68541e-10	up
DYTN	13.5048	91.3159	6.76176	2.33638	3.55361e-12	3.69467e-10	up
CGRRF1	130.706	288.997	2.21105	1.11022	3.71116e-12	3.80089e-10	up
MT-CO1	185330	527668	2.84718	1.43451	3.71008e-12	3.80089e-10	up
EGF	87.9806	573.523	6.51875	2.30639	3.69405e-12	3.80089e-10	up
MT-ND5	47369.6	149169	3.14905	1.55659	3.97159e-12	4.01962e-10	up
MTATP6P1	3099.07	11638.7	3.75553	1.7594	4.71683e-12	4.66381e-10	up
VEGFC	5.24184	39.2683	7.49133	2.41271	4.7482e-12	4.68135e-10	up
FAM83D	15.6387	43.1774	2.76093	1.39708	4.9969e-12	4.89839e-10	up
PGRMC1	1411.54	5747.47	4.07179	1.84678	5.84157e-12	5.60832e-10	up
MIR181A1HG	4.6213	23.8333	5.15727	2.07768	6.08862e-12	5.78672e-10	up
CXCR2P1	562.618	1783.59	3.17016	1.5625	6.47129e-12	6.11757e-10	up
SAMD4A	153.07	350.507	2.28985	1.15643	7.39226e-12	6.8734e-10	up
ARHGEF12	425.541	1269.25	2.98268	1.48806	8.84545e-12	8.11463e-10	up
ELOVL7	121.812	602.546	4.94653	2.04244	9.50042e-12	8.62327e-10	up
P2RY1	49.7734	134.144	2.6951	1.35914	1.03895e-11	9.25882e-10	up
MIR34AHG	6.05928	28.2573	4.66347	1.98201	1.08428e-11	9.56344e-10	up
SH3D19	8.69598	40.5887	4.66752	1.97625	1.12594e-11	9.85489e-10	up
EPSTI1	914.208	2503.38	2.7383	1.38317	1.13263e-11	9.88814e-10	up
DCTN6	123.748	295.356	2.38674	1.20778	1.18577e-11	1.02737e-09	up
THUMPD2	157.21	328.651	2.09052	1.03441	1.21558e-11	1.05054e-09	up
SLC8A3	17.4606	83.1781	4.76377	1.99745	1.60206e-11	1.33091e-09	up
NR4A3	11.1057	60.0684	5.40877	2.11923	1.66397e-11	1.36581e-09	up
OXTR	26.6334	121.098	4.54686	1.95188	1.6706e-11	1.36798e-09	up
CLIC4	413.107	919.787	2.22651	1.11742	2.11353e-11	1.70223e-09	up
GUCY1B1	110.36	538.182	4.87662	2.01649	3.03279e-11	2.35952e-09	up
HEMGN	85.1041	364.454	4.28245	1.88584	3.48627e-11	2.64048e-09	up
SUCNR1	8.48817	41.2709	4.86217	2.00743	3.60613e-11	2.70145e-09	up
MTRNR2L12	4.45846	29.1156	6.5304	2.27396	3.65699e-11	2.72212e-09	up
HIST1H2AG	122.383	518.116	4.23356	1.87359	3.68872e-11	2.73939e-09	up
SLC25A36	669.795	1402.69	2.09421	1.03634	3.72288e-11	2.75879e-09	up
USP18	93.9686	342.868	3.64875	1.71449	4.25784e-11	3.12151e-09	up
ANO2	2.08497	19.0522	9.13784	2.49765	4.34722e-11	3.16674e-09	up
HESX1	6.32488	23.105	3.65304	1.71292	4.4455e-11	3.23147e-09	up
RGS1	196.524	916.194	4.662	1.96849	4.75445e-11	3.43421e-09	up
PSD3	25.1243	67.0882	2.67026	1.34278	5.23533e-11	3.71124e-09	up
RGS18	1790.48	7321.08	4.0889	1.83446	5.49419e-11	3.87872e-09	up
SSX2IP	211.025	522.456	2.4758	1.25146	6.13164e-11	4.26728e-09	up
MT1E	36.9445	114.202	3.09119	1.52392	6.20616e-11	4.31039e-09	up
NT5C3A	935.429	2850.27	3.04702	1.50556	7.26007e-11	4.92781e-09	up
MTND2P28	2996.61	9873.38	3.29485	1.59598	7.76331e-11	5.19219e-09	up
MT-TD	45.251	181.667	4.01465	1.81082	9.52597e-11	6.26123e-09	up
NRIR	61.7492	238.852	3.86809	1.7718	9.70257e-11	6.34086e-09	up
CHD1	1142.58	2879.6	2.52025	1.27356	9.76546e-11	6.3457e-09	up
RUFY4	125.182	357.308	2.85431	1.42576	1.1338e-10	7.21716e-09	up
HIST1H2BJ	181.005	819.961	4.53006	1.93114	1.15184e-10	7.3049e-09	up
CAV2	17.2039	117.345	6.82084	2.28527	1.19593e-10	7.46041e-09	up
SUPV3L1	305.151	664.33	2.17706	1.08526	1.22455e-10	7.61129e-09	up
ZNF326	419.648	870.355	2.07401	1.02156	1.2759e-10	7.85927e-09	up
PRKG1	4.45292	23.1095	5.18974	2.0492	1.27434e-10	7.85927e-09	up
PPIL4	228.661	496.617	2.17185	1.08186	1.28347e-10	7.87758e-09	up
RIPOR3	42.9096	132.402	3.0856	1.5155	1.31611e-10	8.03485e-09	up
RAPGEF5	6.87736	27.6802	4.02483	1.80013	1.33983e-10	8.16511e-09	up
MYCT1	14.8119	83.3849	5.62957	2.12752	1.36845e-10	8.29533e-09	up
RLF	442.07	1008.38	2.28103	1.14542	1.59811e-10	9.53588e-09	up
CDKN2B-AS1	9.04068	19.8694	2.19778	1.08068	1.65717e-10	9.85397e-09	up
PARP14	2553.29	5414.66	2.12066	1.05112	1.67862e-10	9.90793e-09	up
PTK2	159.316	426.483	2.67695	1.34548	1.71029e-10	1.00652e-08	up
MT-TL1	178.078	710.402	3.98928	1.79864	1.78905e-10	1.04748e-08	up
BAMBI	11.7985	84.6828	7.17744	2.31501	1.85134e-10	1.07843e-08	up
HIF1A	1216.78	3023.55	2.48489	1.25364	2.23193e-10	1.27417e-08	up
MCPH1-AS1	25.6006	71.8472	2.80646	1.39826	2.40997e-10	1.36671e-08	up
HIST1H2AE	82.597	533.422	6.45813	2.2307	2.45429e-10	1.38282e-08	up
FEM1C	428.168	906.742	2.11773	1.04786	3.11468e-10	1.7292e-08	up
CFB	3.72134	13.1998	3.54705	1.65209	3.22046e-10	1.77643e-08	up
CLEC1B	195.046	693.645	3.55631	1.67184	3.24281e-10	1.78589e-08	up
ASPM	27.5869	105.812	3.83559	1.75409	3.30072e-10	1.81197e-08	up
C1QB	50.7484	271.795	5.35574	2.07158	3.53879e-10	1.91956e-08	up
TMEM178B	2.79762	11.3849	4.06951	1.81784	3.57445e-10	1.93438e-08	up
DCLRE1A	118.934	329.545	2.77083	1.38506	3.62576e-10	1.9529e-08	up
SCN3A	24.1037	79.1141	3.28224	1.58175	3.63877e-10	1.95377e-08	up
PRKAR2B	1204.28	4950.45	4.11072	1.8229	3.66495e-10	1.96476e-08	up
STIL	23.6568	59.5102	2.51556	1.26938	3.81254e-10	2.03751e-08	up
PIGA	226.804	488.734	2.15487	1.06969	3.98427e-10	2.11611e-08	up
GPRIN3	1038.49	2205.61	2.12386	1.05138	4.24151e-10	2.2414e-08	up
LNCAROD	10.0188	53.6239	5.3523	2.06391	4.57462e-10	2.41098e-08	up
EIF2AK2	961.385	2109.71	2.19445	1.09387	4.68331e-10	2.46071e-08	up
CD69	1084.08	3226.46	2.97622	1.469	4.99251e-10	2.58707e-08	up
GBP5	2884.42	6420.39	2.22589	1.11203	5.14143e-10	2.64869e-08	up
TRPC6	6.32327	28.0448	4.43517	1.88668	5.34058e-10	2.73894e-08	up
CDC42BPA	23.0471	63.1355	2.73941	1.36307	5.79215e-10	2.93952e-08	up
ARG2	18.0983	56.5431	3.12423	1.52175	5.79674e-10	2.93952e-08	up
MED12L	39.0078	120.663	3.0933	1.50954	6.37326e-10	3.19221e-08	up
PDE5A	196.884	618.177	3.1398	1.52863	6.54365e-10	3.26801e-08	up
MTHFD2L	131.134	283.44	2.16146	1.0715	7.10365e-10	3.51697e-08	up
ASAP2	36.1571	118.796	3.28555	1.57582	7.21046e-10	3.55958e-08	up
TTK	9.00392	33.7961	3.75349	1.72927	7.25697e-10	3.57226e-08	up
DOK6	59.9574	158.465	2.64296	1.32248	7.29244e-10	3.58458e-08	up
MT-RNR2	272761	933865	3.42376	1.62493	7.35565e-10	3.61048e-08	up
SPDYA	15.5822	33.9228	2.17703	1.07561	7.70611e-10	3.76098e-08	up
SH3TC2	33.4809	123.395	3.68554	1.70124	7.74607e-10	3.77267e-08	up
DENND4A	494.368	1042.66	2.10907	1.04091	7.92917e-10	3.84795e-08	up
TRIM58	288.497	1126.13	3.90343	1.76256	8.01386e-10	3.87808e-08	up
RHOBTB1	107.319	401.125	3.73769	1.71723	8.04279e-10	3.88659e-08	up
TRHDE	1.57701	12.2003	7.73632	2.31866	8.17282e-10	3.94387e-08	up
IGF2BP3	12.6263	48.071	3.80722	1.73026	8.26976e-10	3.98505e-08	up
MT-TS2	64.0956	268.166	4.18384	1.83157	8.64066e-10	4.14631e-08	up
TSC22D1	906.333	2632.09	2.9041	1.43738	9.00341e-10	4.28442e-08	up
PCYT1B	37.8499	166.228	4.39176	1.87686	9.64194e-10	4.54416e-08	up
ARHGAP18	260.787	602.991	2.31219	1.158	1.09532e-09	5.09222e-08	up
CALHM5	7.95031	38.0508	4.78608	1.95202	1.09455e-09	5.09222e-08	up
PABPC1P3	12.9082	40.4612	3.13453	1.51874	1.16424e-09	5.35456e-08	up
SPX	50.4539	204.132	4.04591	1.79336	1.26652e-09	5.77083e-08	up
FAXDC2	309.451	1217.46	3.93425	1.7655	1.36112e-09	6.12059e-08	up
MT-CO3	73575.6	182487	2.48026	1.24591	1.40094e-09	6.26677e-08	up
SPARC	3811.72	15621.3	4.09823	1.80474	1.57781e-09	6.95819e-08	up
KNL1	29.163	85.5159	2.93234	1.44687	1.6402e-09	7.16881e-08	up
STEAP1B	5.01694	14.9821	2.98629	1.46888	1.65491e-09	7.21475e-08	up
BEND2	128.998	470.465	3.64706	1.68527	1.69171e-09	7.34718e-08	up
PARPBP	15.6187	38.9449	2.49347	1.2538	1.73127e-09	7.50948e-08	up
CCSER1	11.059	33.9573	3.07055	1.49202	1.77518e-09	7.66314e-08	up
LEPR	88.2324	228.414	2.58878	1.29544	1.82197e-09	7.81396e-08	up
PTPN12	1862.77	4696.74	2.52137	1.26504	1.87582e-09	8.01486e-08	up
MACC1	9.80193	23.2658	2.3736	1.18695	1.91315e-09	8.13386e-08	up
SIGLEC1	1320.52	5745.7	4.3511	1.86002	1.93831e-09	8.22046e-08	up
TCEAL9	16.922	67.7712	4.00492	1.77855	1.97308e-09	8.34726e-08	up
C12orf75	537.928	1199.6	2.23005	1.111	1.99563e-09	8.4219e-08	up
RGPD8	57.3471	135.463	2.36216	1.18074	2.02043e-09	8.51611e-08	up
BUB1B	13.8358	47.6482	3.44383	1.62659	2.09203e-09	8.78551e-08	up
ENKUR	196.168	729.468	3.71859	1.70372	2.09873e-09	8.80286e-08	up
RORA	1416.78	3395	2.39627	1.20171	2.16388e-09	9.01005e-08	up
PDCD10	416.841	897.935	2.15414	1.06647	2.2216e-09	9.21684e-08	up
MMP1	1.86159	21.4815	11.5393	2.49433	2.35568e-09	9.69106e-08	up
MATR3	58.4239	146.614	2.50948	1.25643	2.36945e-09	9.73605e-08	up
FAM183BP	7.12102	29.3522	4.12191	1.80012	2.42527e-09	9.90606e-08	up
TFPI	15.5446	59.1856	3.80748	1.72581	2.44663e-09	9.98144e-08	up
HIST2H2BE	1065.93	3830.34	3.59344	1.66674	2.51761e-09	1.02588e-07	up
PLK4	32.9901	84.6296	2.5653	1.2853	2.66956e-09	1.07503e-07	up
ENDOD1	388.053	887.072	2.28596	1.14141	2.81291e-09	1.12352e-07	up
LANCL3	33.7866	98.9389	2.92834	1.43822	2.8695e-09	1.1448e-07	up
F13A1	3087.66	10434.1	3.37931	1.60023	2.95059e-09	1.17306e-07	up
MAP2	6.70541	29.5713	4.41007	1.85739	3.0198e-09	1.19641e-07	up
TMEM45A	7.95014	41.5537	5.22679	2.01107	3.24707e-09	1.28054e-07	up
ENC1	291.856	864.966	2.96368	1.45381	3.2533e-09	1.28152e-07	up
FNBP1L	26.9968	101.777	3.76995	1.71042	3.27756e-09	1.28812e-07	up
SPATS2L	128.087	275.649	2.15205	1.06476	3.35492e-09	1.31551e-07	up
LYPLAL1-DT	12.3028	45.0408	3.66102	1.67737	3.4314e-09	1.33786e-07	up
MIR5685	1.35121	7.0283	5.20148	1.99055	3.44643e-09	1.34067e-07	up
NCKAP1	78.8001	243.974	3.09612	1.5011	3.53535e-09	1.36905e-07	up
CENPE	25.1776	82.6217	3.28155	1.56826	3.55209e-09	1.37141e-07	up
RNA5SP37	2.2003	11.1601	5.07209	1.9702	3.54865e-09	1.37141e-07	up
GALNT5	0.910296	6.16365	6.77104	2.15937	3.55744e-09	1.37141e-07	up
CDCA7	86.4343	217.323	2.51431	1.2601	3.71488e-09	1.4289e-07	up
MT-TY	164.646	600.41	3.64667	1.67748	3.93981e-09	1.50865e-07	up
CD226	934.611	1986.86	2.12587	1.0481	4.17037e-09	1.58456e-07	up
HIST1H3H	693.696	2938.55	4.23608	1.82492	4.17979e-09	1.58638e-07	up
MIR3657	0.179644	3.09878	17.2496	2.53746	4.2435e-09	1.60523e-07	up
MAST4-AS1	11.1589	39.7245	3.55988	1.6462	4.35743e-09	1.63929e-07	up
HIST1H1E	6.88749	58.5165	8.49606	2.33681	4.53955e-09	1.6985e-07	up
ABLIM3	304.02	1230.68	4.04802	1.7802	4.61121e-09	1.72152e-07	up
GRHL1	35.1983	120.322	3.4184	1.60659	4.62254e-09	1.72203e-07	up
MTND4P12	10.8969	62.467	5.73255	2.07855	4.7127e-09	1.74803e-07	up
ARHGAP6	96.2051	382.946	3.98052	1.76289	4.7688e-09	1.76502e-07	up
RSU1	1257.91	3101.55	2.46564	1.2342	4.80797e-09	1.77569e-07	up
RAB27B	206.969	635.924	3.07256	1.49104	5.36345e-09	1.9535e-07	up
TTC7B	131.56	515.447	3.91796	1.74622	5.40985e-09	1.96831e-07	up
MT-ND2	73655.9	209660	2.84649	1.40473	5.45442e-09	1.97823e-07	up
PDE4D	420.872	1266.35	3.00887	1.46766	5.53372e-09	2.00488e-07	up
RTCA-AS1	12.5831	37.4319	2.97477	1.44428	5.8218e-09	2.09597e-07	up
MT-RNR1	111665	387337	3.46874	1.62199	5.99163e-09	2.15259e-07	up
ZBTB43	425.118	963.497	2.26642	1.1283	6.47457e-09	2.30438e-07	up
MT-CO2	74033.1	181867	2.45657	1.22852	6.89403e-09	2.42103e-07	up
LRRC7	25.6752	57.4208	2.23643	1.10415	6.9013e-09	2.4211e-07	up
FHL2	49.3481	150.025	3.04014	1.47762	6.94893e-09	2.43167e-07	up
CAVIN2	2864.25	9431.1	3.2927	1.56538	6.96929e-09	2.43252e-07	up
LRRC70	6.41303	20.9182	3.26183	1.5436	7.30392e-09	2.53641e-07	up
LRP12	32.9641	101.078	3.0663	1.48362	7.52233e-09	2.60173e-07	up
RNU6-101P	0.967773	5.79226	5.98514	2.06741	7.73371e-09	2.66409e-07	up
NAT8B	37.0616	194.491	5.24779	2.0007	7.90286e-09	2.70606e-07	up
SERPINE1	18.7692	69.7702	3.71727	1.68715	8.33978e-09	2.82187e-07	up
HERC6	400.492	839.068	2.09509	1.02814	8.52942e-09	2.87753e-07	up
HIST1H2AC	2368.66	8141.87	3.43733	1.60923	8.52237e-09	2.87753e-07	up
ODC1	1306.13	2774.76	2.12441	1.04555	9.20353e-09	3.07771e-07	up
BMP6	189.905	602.027	3.17015	1.52168	9.3905e-09	3.11895e-07	up
APOBEC3H	73.1507	164.275	2.2457	1.11691	9.42589e-09	3.12466e-07	up
RN7SKP23	17.1844	42.0794	2.4487	1.2133	9.91991e-09	3.26008e-07	up
GCKR	0.49965	6.90154	13.8127	2.47776	9.95626e-09	3.26577e-07	up
ANKRD36	129.898	293.922	2.26272	1.12466	1.01762e-08	3.32837e-07	up
EGFL7	79.3108	368.819	4.6503	1.89522	1.08511e-08	3.51893e-07	up
ITGB3	392.997	1616.65	4.11363	1.78403	1.13123e-08	3.64436e-07	up
C3orf35	28.7281	66.5982	2.31822	1.15055	1.14497e-08	3.68519e-07	up
FRMD4B	192.668	418.885	2.17413	1.0731	1.16951e-08	3.73959e-07	up
MCUR1	345.192	902.552	2.61463	1.30086	1.17367e-08	3.74941e-07	up
PCSK6	144.553	597.945	4.13652	1.78775	1.23289e-08	3.9131e-07	up
RGS10	1269.13	3456.34	2.72339	1.34887	1.23509e-08	3.91645e-07	up
ABCC4	185.376	666.751	3.59675	1.65145	1.27759e-08	4.04001e-07	up
KIAA1211	8.48957	39.534	4.65677	1.88522	1.3516e-08	4.25056e-07	up
MSANTD3	141.229	327.513	2.31901	1.15388	1.36589e-08	4.28627e-07	up
PPBP	2772.13	10904.1	3.93348	1.73815	1.49356e-08	4.64587e-07	up
WHAMMP3	230.058	582.094	2.53021	1.2602	1.52978e-08	4.74135e-07	up
RPS15AP30	5.3135	20.5059	3.85922	1.71937	1.61188e-08	4.9644e-07	up
RYR2	10.063	51.602	5.12789	1.96615	1.61725e-08	4.9765e-07	up
DDX18P1	5.10671	16.1724	3.16689	1.50256	1.71437e-08	5.2565e-07	up
MT-TN	1796.33	4978.41	2.77143	1.36727	1.7292e-08	5.28779e-07	up
TRHDE-AS1	1.15215	10.2256	8.87519	2.30185	1.8017e-08	5.47046e-07	up
MAOB	4.90823	38.7681	7.8986	2.24515	1.83438e-08	5.55496e-07	up
RNF11	1258.17	3091.43	2.45709	1.22472	1.84332e-08	5.5771e-07	up
RBM44	48.6631	103.03	2.11721	1.03595	1.86636e-08	5.63387e-07	up
USP3-AS1	70.582	167.942	2.37938	1.18261	1.96174e-08	5.88865e-07	up
DAB2	285.297	872.082	3.05675	1.47611	1.98201e-08	5.93391e-07	up
MT-ND1	79629.9	233069	2.9269	1.42834	1.9848e-08	5.9371e-07	up
ZDHHC4P1	1.64074	8.19268	4.99329	1.92707	2.00102e-08	5.97e-07	up
CCDC173	1.4898	10.7781	7.23456	2.18843	2.03054e-08	6.03708e-07	up
PLOD2	10.5119	38.7845	3.68957	1.66629	2.13671e-08	6.29274e-07	up
SNORD11	2.95765	11.5998	3.92196	1.73157	2.14788e-08	6.31482e-07	up
VEPH1	32.0802	125.554	3.91377	1.7263	2.18092e-08	6.3955e-07	up
DNAH12	5.14882	16.4546	3.1958	1.51813	2.28588e-08	6.67476e-07	up
HIST1H2BD	123.048	468.708	3.80914	1.70164	2.35816e-08	6.86247e-07	up
ALPK2	3.96757	15.4394	3.89141	1.71742	2.39471e-08	6.96292e-07	up
PRTFDC1	19.7875	61.1893	3.09232	1.4821	2.439e-08	7.07971e-07	up
DDX60	442.486	938.508	2.12099	1.04135	2.45576e-08	7.11632e-07	up
MTURN	1421.97	4018.28	2.82584	1.38707	2.53106e-08	7.30366e-07	up
PARD3	40.1478	153.332	3.81918	1.70136	2.60374e-08	7.49448e-07	up
TWISTNB	164.687	343.358	2.08492	1.01814	2.70418e-08	7.75757e-07	up
SLFN14	19.6959	51.0938	2.59414	1.28116	2.8014e-08	8.00966e-07	up
DIP2A-IT1	12.8498	38.4284	2.99059	1.44806	3.02098e-08	8.50985e-07	up
ASS1P1	7.97221	25.4224	3.18888	1.50832	3.08418e-08	8.64528e-07	up
ANKRD36B	81.4171	192.405	2.3632	1.17441	3.0887e-08	8.65046e-07	up
HIST1H2BL	2.38096	12.6679	5.32052	1.98188	3.09107e-08	8.65046e-07	up
HIST1H2AI	9.04199	48.205	5.33123	1.98072	3.13107e-08	8.75525e-07	up
MT-CYB	58243.4	141635	2.43178	1.21001	3.19367e-08	8.91577e-07	up
FIRRE	19.5282	43.8566	2.24581	1.10836	3.35951e-08	9.29564e-07	up
OSBPL10-AS1	1.88534	13.985	7.41772	2.19084	3.45316e-08	9.51629e-07	up
DLEU2L	8.50448	20.9497	2.46337	1.21477	3.48382e-08	9.5777e-07	up
NUF2	26.6553	61.5409	2.30877	1.1483	3.53884e-08	9.70565e-07	up
PRR16	5.12967	19.2044	3.7438	1.67017	3.58392e-08	9.79015e-07	up
EIF2AK1	1890.54	4309.65	2.27959	1.13041	3.64098e-08	9.89873e-07	up
PLA2G12A	258.053	594.92	2.30541	1.14363	3.64055e-08	9.89873e-07	up
SPANXN4	0.494504	4.61639	9.3354	2.26981	3.65958e-08	9.94142e-07	up
MIR222HG	28.2557	66.7567	2.36259	1.17047	3.84069e-08	1.03433e-06	up
TMEM155	2.47769	10.7071	4.32142	1.80701	3.98654e-08	1.06608e-06	up
HIST1H4K	8.06432	26.2112	3.25027	1.52727	4.21677e-08	1.11806e-06	up
STON2	74.9001	237.949	3.17688	1.51058	4.28712e-08	1.13234e-06	up
SNORD13E	1.10879	9.13706	8.2406	2.22227	4.34429e-08	1.14568e-06	up
RGS6	77.895	277.888	3.56747	1.62898	4.45836e-08	1.17396e-06	up
MLH3	604.841	1431.21	2.36627	1.17492	4.8531e-08	1.27107e-06	up
KIF20B	108.779	233.97	2.15088	1.05621	4.98014e-08	1.29938e-06	up
CMPK2	398.515	1009.67	2.53359	1.25698	5.02097e-08	1.30804e-06	up
GAPDHP42	3.23062	12.398	3.83766	1.68796	5.12671e-08	1.33256e-06	up
AREG	14.8105	72.7473	4.91189	1.90721	5.66604e-08	1.45619e-06	up
KIF19	92.3441	301.029	3.25986	1.53566	5.7427e-08	1.47149e-06	up
MT-TR	162.834	591.23	3.63088	1.64329	5.93304e-08	1.51686e-06	up
TMEM40	269.905	1002.09	3.71275	1.66436	6.11635e-08	1.55908e-06	up
TNFAIP3	3549.44	8149.51	2.296	1.13736	6.16688e-08	1.56963e-06	up
GRAP2	2562.86	6692.83	2.61146	1.29099	6.25814e-08	1.58932e-06	up
ACKR4	4.66255	14.0406	3.01135	1.44185	6.35245e-08	1.61088e-06	up
SMOX	736.762	2770.73	3.76069	1.67558	6.59842e-08	1.66833e-06	up
PROS1	46.7417	187.411	4.0095	1.73326	6.75234e-08	1.70097e-06	up
NEXN-AS1	7.38821	30.8989	4.18219	1.76754	6.79919e-08	1.70776e-06	up
TUBB1	2160.64	7181.09	3.32359	1.55351	6.9085e-08	1.72889e-06	up
MT-TV	256.771	895.272	3.48666	1.60159	6.90385e-08	1.72889e-06	up
CALM2P2	36.8752	106.406	2.88557	1.40068	7.10301e-08	1.77498e-06	up
ESAM	389.446	1470.07	3.77478	1.67783	7.1888e-08	1.79253e-06	up
RADIL	5.54729	19.6829	3.5482	1.61584	7.95027e-08	1.94324e-06	up
MYLK	367.257	1161.73	3.16325	1.5007	8.01781e-08	1.95516e-06	up
MS4A4A	71.7693	187.924	2.61844	1.29249	8.16701e-08	1.98599e-06	up
ANXA10	0.737762	4.00844	5.43324	1.96179	8.7904e-08	2.10761e-06	up
C1orf112	69.3608	146.727	2.11542	1.0317	8.85692e-08	2.12059e-06	up
TMEM17	5.41283	17.4883	3.2309	1.5106	9.04913e-08	2.15758e-06	up
TDRP	49.1843	149.931	3.04836	1.4588	9.22861e-08	2.19732e-06	up
GUCY1A1	59.5988	191.885	3.2196	1.51564	9.58604e-08	2.26982e-06	up
PTGFR	1.45307	8.8302	6.07693	2.03528	9.77316e-08	2.30776e-06	up
LY6G6F	30.9849	121.519	3.92188	1.70744	9.84482e-08	2.32308e-06	up
ZC3HAV1L	34.6371	97.9255	2.82719	1.37721	1.0068e-07	2.36769e-06	up
SIDT1-AS1	4.69179	14.5148	3.09366	1.45996	1.00684e-07	2.36769e-06	up
PTGS1	2257.01	7561.95	3.35043	1.55721	1.0299e-07	2.4153e-06	up
ZNF185	963.921	2874.81	2.98242	1.43593	1.03499e-07	2.42394e-06	up
KIFAP3	174.65	422.498	2.41912	1.19713	1.07542e-07	2.50835e-06	up
WASF1	41.1789	110.175	2.67551	1.31198	1.08119e-07	2.52009e-06	up
RNU7-40P	5.2863	13.4994	2.55365	1.25952	1.09074e-07	2.53717e-06	up
SNORD59A	6.54956	17.886	2.73087	1.32808	1.09182e-07	2.53768e-06	up
SMILR	2.7312	13.5283	4.95325	1.9027	1.14098e-07	2.63973e-06	up
MAP1B	7.58016	23.6815	3.12415	1.47808	1.14721e-07	2.65055e-06	up
MMRN1	49.0644	205.713	4.19272	1.76238	1.23219e-07	2.81467e-06	up
C1QA	134.741	463.284	3.43834	1.58069	1.26289e-07	2.87333e-06	up
E2F7	8.06752	29.3609	3.6394	1.63737	1.30425e-07	2.95567e-06	up
KIF28P	25.9761	101.926	3.92383	1.70307	1.32228e-07	2.99257e-06	up
MYEOV	44.2089	145.956	3.30151	1.53844	1.32823e-07	3.00407e-06	up
KCNH8	48.8473	139.259	2.8509	1.38359	1.35962e-07	3.06898e-06	up
SELP	181.578	646.705	3.56158	1.61348	1.36522e-07	3.07959e-06	up
FTH1P2	54.1643	123.549	2.281	1.1259	1.36802e-07	3.08389e-06	up
DNM3	92.8061	276.785	2.98241	1.43238	1.3855e-07	3.11306e-06	up
CMTM5	297.148	1257.35	4.23141	1.76899	1.41272e-07	3.17192e-06	up
MYL9	1034.33	5402.15	5.22283	1.93242	1.44664e-07	3.23772e-06	up
GNG11	1073.68	3410.41	3.17636	1.49821	1.57123e-07	3.48474e-06	up
SH3BGRL2	624.138	2030.9	3.25392	1.52269	1.583e-07	3.50631e-06	up
NCBP2L	4.29963	13.7297	3.19323	1.49467	1.62593e-07	3.59212e-06	up
RUFY1	1297.54	3139.77	2.41979	1.19604	1.69332e-07	3.7266e-06	up
ANO6	1105.06	2356.56	2.13252	1.04199	1.71027e-07	3.76119e-06	up
PF4V1	151.986	544.224	3.58074	1.61536	1.72764e-07	3.79241e-06	up
HIST1H2BG	81.0264	264.511	3.26451	1.52413	1.76735e-07	3.85981e-06	up
UACA	52.0256	126.587	2.43317	1.19961	1.89349e-07	4.10914e-06	up
PDE2A	29.5176	107.844	3.65357	1.63165	1.93855e-07	4.19367e-06	up
ZNHIT1P1	0.429541	3.20275	7.45622	2.08829	1.94672e-07	4.19999e-06	up
XAF1	543.447	1391.73	2.56094	1.26124	2.00629e-07	4.30762e-06	up
LIMS1	1585.15	3698.43	2.33317	1.15131	2.16572e-07	4.58396e-06	up
THRB	39.3515	120.467	3.0613	1.45504	2.1818e-07	4.6123e-06	up
LY6E-DT	8.65335	19.8942	2.29902	1.13264	2.19087e-07	4.62576e-06	up
PDE3A	11.0784	42.9817	3.87977	1.67868	2.20685e-07	4.65378e-06	up
FGF2	4.42665	18.1069	4.09042	1.72279	2.23728e-07	4.70927e-06	up
SYTL4	16.5245	62.3245	3.77163	1.654	2.44862e-07	5.10093e-06	up
GAS2L3	14.0189	35.1964	2.51064	1.22766	2.47533e-07	5.14719e-06	up
SMC4	350.223	786.94	2.24697	1.10485	2.60533e-07	5.39788e-06	up
SYNM	94.3377	239.945	2.54347	1.25066	2.7225e-07	5.61579e-06	up
INKA2-AS1	6.70897	24.1871	3.60519	1.61366	2.80198e-07	5.75319e-06	up
ENTHD1	1.31904	6.25038	4.73859	1.82767	2.80992e-07	5.75916e-06	up
NCAPG	23.8507	70.0701	2.93787	1.41375	2.89332e-07	5.8844e-06	up
PEAR1	257.132	883.66	3.4366	1.5687	2.93728e-07	5.96674e-06	up
CDK1	23.2081	68.4093	2.94765	1.4163	2.94346e-07	5.97574e-06	up
GMPR	266.525	877.164	3.29112	1.5265	2.97192e-07	6.01572e-06	up
ACRBP	1075.33	3482.18	3.23824	1.51008	3.06366e-07	6.16868e-06	up
MEIS3P2	2.02465	15.2236	7.51915	2.10863	3.12668e-07	6.28449e-06	up
MT-ND4	106584	258364	2.42404	1.19477	3.16671e-07	6.3472e-06	up
ATL1	30.2904	69.8936	2.30745	1.13021	3.21764e-07	6.42965e-06	up
ETFA	720.244	1521.32	2.11223	1.0278	3.28506e-07	6.54912e-06	up
MRPL37P1	0.643563	4.06477	6.31605	2.00857	3.47833e-07	6.86266e-06	up
TREML1	738.354	2625.18	3.55545	1.59831	3.55501e-07	6.98582e-06	up
IPO11	85.4607	178.481	2.08846	1.01133	3.83445e-07	7.4641e-06	up
HRASLS	22.006	87.7672	3.98833	1.69832	3.84803e-07	7.48023e-06	up
CD80	8.92508	20.5044	2.29739	1.11604	4.09351e-07	7.92902e-06	up
REEP1	5.88412	25.0141	4.25112	1.75063	4.12793e-07	7.9836e-06	up
HIST1H2BK	363.658	1073.67	2.95242	1.41139	4.32974e-07	8.33031e-06	up
GATA1	60.5775	267.375	4.41376	1.77969	4.34499e-07	8.35163e-06	up
MT-TA	48.55	161.247	3.32125	1.53029	4.40923e-07	8.45143e-06	up
ITGA2B	2528.47	10129	4.00596	1.70011	4.56713e-07	8.7103e-06	up
GRK5-IT1	2.19338	8.72841	3.97944	1.69232	4.60408e-07	8.77588e-06	up
SMIM3	322.111	921.958	2.86224	1.37775	4.67688e-07	8.89983e-06	up
RNY1P13	4.69493	16.6286	3.54183	1.57988	4.82229e-07	9.12591e-06	up
BBOF1	23.6632	56.3244	2.38025	1.16385	5.1389e-07	9.63473e-06	up
DENND5B	109.607	226.834	2.06952	1.00137	5.17012e-07	9.68268e-06	up
TPM1	229.878	610.702	2.65664	1.29449	5.79986e-07	1.07622e-05	up
YES1P1	7.6484	19.1394	2.5024	1.22412	5.8391e-07	1.08233e-05	up
RAD51AP1	22.7853	51.0659	2.24117	1.10055	6.07339e-07	1.12273e-05	up
SLC6A4	22.0996	62.6928	2.83683	1.36082	6.20575e-07	1.14484e-05	up
HJURP	27.7219	78.7276	2.8399	1.36979	6.20634e-07	1.14484e-05	up
DUSP4	30.0474	80.6952	2.68559	1.30578	6.31919e-07	1.1619e-05	up
IL6	7.61935	32.0506	4.20648	1.73383	6.51148e-07	1.19088e-05	up
LTBP1	153.364	512.247	3.34007	1.52967	6.56533e-07	1.19881e-05	up
TNFSF4	127.833	346.439	2.71008	1.31504	6.75951e-07	1.22969e-05	up
HIST1H2BF	13.8239	45.0965	3.26222	1.50306	6.77157e-07	1.23058e-05	up
HRAT92	162.95	490.59	3.01068	1.42631	7.12445e-07	1.28788e-05	up
PER1	1957.87	6084.17	3.10755	1.45805	7.32429e-07	1.31845e-05	up
ZNF385D	24.2424	89.8067	3.70453	1.61971	8.00491e-07	1.42452e-05	up
CA2	442.286	1338.87	3.02717	1.43019	8.17619e-07	1.45124e-05	up
RNY1P16	4.06524	15.4664	3.80454	1.63365	8.56788e-07	1.50905e-05	up
SNORA19	1.66975	6.99989	4.19217	1.7117	8.61531e-07	1.51585e-05	up
ITGB5	471.039	1575.22	3.34413	1.52696	8.77016e-07	1.54152e-05	up
GP6	101.967	325.41	3.19132	1.48093	9.0299e-07	1.58231e-05	up
CLU	2965.71	9930.11	3.3483	1.52741	9.23875e-07	1.6156e-05	up
PDLIM1	847.552	2404.64	2.83716	1.36173	9.2739e-07	1.61864e-05	up
MFSD2B	58.2158	208.278	3.5777	1.58732	9.29727e-07	1.6217e-05	up
PRDX3P1	14.2667	44.4186	3.11344	1.45265	9.54229e-07	1.65435e-05	up
PF4	3341.9	11054.6	3.30788	1.51515	9.71365e-07	1.67897e-05	up
MGLL	384.141	1143.5	2.97676	1.4109	9.72953e-07	1.68087e-05	up
F2RL3	38.0908	126.773	3.32816	1.51972	9.81821e-07	1.69193e-05	up
HIST1H4I	178.47	478.703	2.68227	1.30087	9.85044e-07	1.69408e-05	up
E2F6P4	1.39486	7.54073	5.40607	1.87698	1.0667e-06	1.8127e-05	up
FAM217A	2.66758	10.3418	3.87685	1.64275	1.07328e-06	1.82299e-05	up
RNA5-8SN2	1.5274	6.09584	3.991	1.6995	1.15391e-06	1.93881e-05	up
MTCO2P12	0.679703	5.11895	7.53116	2.04895	1.17289e-06	1.96493e-05	up
C1orf198	140.418	313.775	2.23458	1.09013	1.19877e-06	2.00242e-05	up
CDC14B	236.514	608.479	2.5727	1.25284	1.20825e-06	2.01336e-05	up
ABCC3	639.031	1681.58	2.63145	1.27815	1.21528e-06	2.02311e-05	up
HIPK1-AS1	3.22688	10.189	3.15755	1.46015	1.2423e-06	2.06508e-05	up
TMC1	0.964695	7.48191	7.75573	2.05069	1.25682e-06	2.08618e-05	up
FFAR1	22.8416	83.6838	3.66365	1.60314	1.26634e-06	2.09792e-05	up
MYCBP2-AS1	2.34382	8.75299	3.73449	1.60449	1.27535e-06	2.10777e-05	up
LRRC32	14.1662	40.6183	2.86727	1.36288	1.28333e-06	2.1179e-05	up
IL10	2.97785	11.9451	4.01134	1.67283	1.29492e-06	2.13412e-05	up
BEST3	1.36593	7.87367	5.76434	1.90845	1.29769e-06	2.13646e-05	up
DUTP2	0.625822	4.09164	6.53802	1.97134	1.32652e-06	2.17869e-05	up
CHST8	21.1638	98.5585	4.65694	1.79019	1.34452e-06	2.20404e-05	up
MFAP3L	199.92	548.413	2.74317	1.32184	1.35481e-06	2.21667e-05	up
KEL	5.00807	16.1924	3.23326	1.48203	1.37291e-06	2.23988e-05	up
MT-ND3	31614.7	69774.2	2.20702	1.07537	1.40972e-06	2.28904e-05	up
HIST1H3J	3.46837	16.4835	4.75252	1.79417	1.41831e-06	2.30074e-05	up
CTDSPL	254.055	766.435	3.0168	1.4197	1.42419e-06	2.306e-05	up
ANKRD36C	60.5022	151.515	2.50429	1.2209	1.48521e-06	2.38511e-05	up
HIST1H4E	7.82146	25.0254	3.19959	1.47872	1.49677e-06	2.39653e-05	up
EFHC2	62.1798	137.025	2.2037	1.07031	1.52189e-06	2.42979e-05	up
TKTL2	3.16343	12.2173	3.86205	1.63851	1.52285e-06	2.43e-05	up
FBXO39	2.26326	6.64054	2.93406	1.38806	1.55663e-06	2.47144e-05	up
CALD1	44.2828	155.149	3.50359	1.55858	1.58205e-06	2.5037e-05	up
NET1	110.794	237.231	2.14119	1.03697	1.60451e-06	2.53509e-05	up
TENM1	181.283	422.818	2.33236	1.13916	1.61774e-06	2.55311e-05	up
DNAH8	15.7948	38.2094	2.41912	1.18098	1.6284e-06	2.56521e-05	up
ANK1	164.209	440.611	2.68324	1.29609	1.6368e-06	2.57491e-05	up
MPIG6B	1084.53	3346.98	3.08611	1.44035	1.65862e-06	2.60684e-05	up
PLEKHS1	1.22627	4.48359	3.65629	1.57005	1.67067e-06	2.62217e-05	up
RNU6-638P	1.53525	6.93167	4.51501	1.73675	1.70889e-06	2.67482e-05	up
IFNG	47.4334	149.244	3.14639	1.4586	1.71262e-06	2.67944e-05	up
HSP90B2P	5.26641	11.6611	2.21425	1.07829	1.72977e-06	2.70012e-05	up
PTP4A2P2	43.3619	134.384	3.09913	1.44342	1.7534e-06	2.73327e-05	up
METTL21EP	10.0143	31.7715	3.17262	1.45863	1.80789e-06	2.80545e-05	up
PLCH1	5.80561	20.6123	3.5504	1.56099	1.93958e-06	2.97218e-05	up
GFI1B	497.707	1482.9	2.97947	1.4033	1.95036e-06	2.9847e-05	up
PHBP9	40.1674	88.59	2.20552	1.06888	1.9623e-06	2.99895e-05	up
NFIB	1.16643	6.05021	5.18693	1.83307	1.98338e-06	3.02982e-05	up
IL13	1.82638	6.60905	3.61867	1.56385	1.98724e-06	3.03302e-05	up
PLXNB3	23.1935	87.4643	3.77106	1.6157	2.06114e-06	3.13465e-05	up
ITGA9-AS1	21.3745	61.0601	2.85668	1.3569	2.0636e-06	3.13701e-05	up
DMTN	937.194	2900.52	3.09489	1.43989	2.08216e-06	3.15929e-05	up
IGHV7-4-1	29.6842	596.562	20.097	2.21806	2.15102e-06	3.25547e-05	up
CDC42P5	10.8662	25.2327	2.32212	1.12735	2.18055e-06	3.2929e-05	up
INKA1	61.4401	201.48	3.2793	1.4938	2.19699e-06	3.31072e-05	up
TM4SF1	2.03955	9.49465	4.65526	1.7734	2.23025e-06	3.35026e-05	up
ARMC3	13.6298	39.7475	2.91622	1.37624	2.23945e-06	3.35967e-05	up
VN1R110P	1.5597	9.05728	5.80706	1.89505	2.31194e-06	3.45632e-05	up
HELLPAR	7.87112	17.6499	2.24236	1.09082	2.37717e-06	3.54458e-05	up
GP1BA	235.407	675.528	2.86962	1.36231	2.41968e-06	3.59391e-05	up
C2	49.2406	110.491	2.24391	1.09229	2.42676e-06	3.5982e-05	up
RGS17P1	19.7174	47.0474	2.38608	1.16028	2.49057e-06	3.68008e-05	up
CRYM	11.6532	40.3668	3.46402	1.53959	2.57474e-06	3.77841e-05	up
SMIM5	170.26	541.069	3.17791	1.46162	2.63544e-06	3.85266e-05	up
PTCRA	348.404	1144.74	3.28568	1.49278	2.63949e-06	3.8553e-05	up
SH3RF2	9.16282	27.884	3.04316	1.42096	2.6668e-06	3.88361e-05	up
MT-TG	120.628	339.359	2.81327	1.34052	2.73243e-06	3.97412e-05	up
TMSB15A	1.4189	8.63584	6.0863	1.91032	2.75791e-06	4.00609e-05	up
TP53TG3	1.44557	13.4879	9.33052	2.07699	2.83984e-06	4.11117e-05	up
IGLV1-51	160.131	1115.3	6.96495	1.98184	2.8763e-06	4.1552e-05	up
ASS1P12	8.53618	17.9395	2.10159	1.00054	2.92782e-06	4.21366e-05	up
REL	391.895	834.976	2.13061	1.0289	2.94617e-06	4.23829e-05	up
WDR11-AS1	80.2696	234.067	2.91601	1.37552	2.95037e-06	4.24077e-05	up
GLYATL2	2.04318	12.5069	6.12126	1.91722	3.04983e-06	4.36362e-05	up
RAB6B	101.05	325.164	3.21786	1.47022	3.08785e-06	4.41618e-05	up
BEX3	384.537	1037.59	2.69828	1.29559	3.19357e-06	4.55878e-05	up
HTR2A	2.24904	10.3965	4.62262	1.74785	3.24744e-06	4.62404e-05	up
GLYATL1P1	7.00171	19.1891	2.74063	1.30048	3.30117e-06	4.68998e-05	up
ZMYND12	6.47991	18.3343	2.8294	1.3363	3.31297e-06	4.69897e-05	up
ZNF483	16.7154	35.0523	2.097	1.00363	3.32405e-06	4.71274e-05	up
ALMS1-IT1	16.7584	37.1272	2.21544	1.07136	3.33014e-06	4.71942e-05	up
SLC12A8	7.80679	16.6259	2.12967	1.02565	3.35832e-06	4.75347e-05	up
RF00019	21.7369	61.303	2.82022	1.33899	3.45016e-06	4.8654e-05	up
NT5M	246.989	791.673	3.2053	1.46515	3.47087e-06	4.89058e-05	up
TSPAN9	209.03	678.452	3.24571	1.47643	3.5105e-06	4.94034e-05	up
E2F8	8.56153	29.1807	3.40835	1.5228	3.54616e-06	4.98438e-05	up
CADM2	5.09917	24.162	4.73841	1.76853	3.5802e-06	5.02811e-05	up
LY6G6E	40.3442	137.147	3.39942	1.51581	3.69039e-06	5.17228e-05	up
MT-TS1	16.8239	47.8523	2.8443	1.34743	3.82696e-06	5.33968e-05	up
OSBP2	152.262	484.611	3.18274	1.45572	4.00559e-06	5.54832e-05	up
BRD7P2	10.1674	21.3824	2.10304	1.00736	4.06392e-06	5.61098e-05	up
TRPC2	24.0641	69.8144	2.90119	1.36237	4.23989e-06	5.81883e-05	up
MIR4742	0.589833	3.72968	6.32328	1.89864	4.29317e-06	5.87784e-05	up
MTND3P23	1.82269	6.3543	3.48622	1.51664	4.30402e-06	5.89035e-05	up
FABP4	0.325405	3.63455	11.1693	2.07642	4.33735e-06	5.93123e-05	up
KLHDC7B	216.502	479.423	2.2144	1.07311	4.36679e-06	5.95487e-05	up
SKAP1-AS1	5.38038	15.5824	2.89616	1.36513	4.44156e-06	6.04962e-05	up
TRBV7-5	4.9057	17.8103	3.63053	1.55883	4.48486e-06	6.09409e-05	up
UGT2B28	2.14595	9.1704	4.27335	1.68197	4.50527e-06	6.11456e-05	up
CXCL11	2.55631	10.2221	3.99878	1.64233	4.51216e-06	6.1181e-05	up
CATSPERD	0.353306	2.71797	7.69296	1.96089	4.51324e-06	6.1181e-05	up
EDA2R	3.29206	8.25216	2.50668	1.19599	4.59274e-06	6.21605e-05	up
CXCL5	341.06	1096.65	3.21543	1.46313	4.6232e-06	6.25481e-05	up
MTCO3P12	4.86822	18.1919	3.73687	1.58641	4.71601e-06	6.36531e-05	up
AVPR1A	20.7754	52.1289	2.50916	1.2106	4.77727e-06	6.43535e-05	up
MT1G	0.805933	6.14351	7.62285	1.98109	4.7885e-06	6.44541e-05	up
OSMR	13.0528	36.1095	2.76642	1.3112	4.8436e-06	6.50681e-05	up
PBX1	80.3978	217.314	2.70298	1.29164	4.89395e-06	6.57187e-05	up
RGPD3	6.12924	13.3528	2.17854	1.0292	4.9572e-06	6.64901e-05	up
XRCC2	18.6007	42.2656	2.27226	1.10068	5.09558e-06	6.8133e-05	up
COX6CP1	2.82327	9.02541	3.19679	1.44027	5.12118e-06	6.8422e-05	up
DDX50P1	8.51943	18.4261	2.16283	1.03377	5.1714e-06	6.89586e-05	up
EGLN3	39.4989	89.9645	2.27765	1.10126	5.21771e-06	6.94682e-05	up
GP9	426.4	1479.97	3.47084	1.52805	5.3181e-06	7.05857e-05	up
ENSAP2	17.7083	38.4789	2.17293	1.05064	5.37563e-06	7.11841e-05	up
WASF3	15.6518	49.8301	3.18367	1.44716	5.43465e-06	7.18547e-05	up
MT-ATP6	72937.8	157902	2.16488	1.04483	5.43676e-06	7.18549e-05	up
CENPF	62.6439	165.874	2.64789	1.27051	5.62988e-06	7.39601e-05	up
TAGLN2P1	4.36596	12.7737	2.92574	1.36137	5.63269e-06	7.39601e-05	up
FHL1	244.374	674.77	2.76121	1.31225	5.66938e-06	7.43564e-05	up
TRAPPC3L	21.1679	60.7098	2.86802	1.34725	5.69355e-06	7.46449e-05	up
RNU6-574P	4.14519	12.6198	3.04445	1.39711	5.73964e-06	7.51917e-05	up
MT-TW	30.8515	87.5578	2.83804	1.34016	5.80778e-06	7.58816e-05	up
NPTX1	13.826	37.1595	2.68765	1.28443	6.10636e-06	7.90303e-05	up
CTTN	624.432	1709.52	2.73772	1.30193	6.62788e-06	8.48314e-05	up
PROSER2	59.7245	150.958	2.52757	1.21642	6.675e-06	8.52958e-05	up
CA1	6.14242	38.83	6.32162	1.89625	6.6799e-06	8.53267e-05	up
MTATP6P11	2.75823	9.06739	3.28739	1.46604	6.80162e-06	8.66878e-05	up
CDH6	0.190348	2.97175	15.6122	2.08414	7.02093e-06	8.91847e-05	up
CEP55	15.7551	48.3123	3.06645	1.41538	7.06592e-06	8.97231e-05	up
PIGHP1	12.3815	28.6049	2.3103	1.11256	7.1622e-06	9.08447e-05	up
COL1A1	2.25803	9.32014	4.12756	1.64081	7.3398e-06	9.28471e-05	up
LCMT1-AS2	5.61333	15.5177	2.76444	1.29652	7.45992e-06	9.39611e-05	up
TEX45	1.46706	7.72402	5.26496	1.7934	7.54163e-06	9.48161e-05	up
THBS1	605.372	1532.94	2.53223	1.21867	7.61255e-06	9.54978e-05	up
TGFB2	2.02877	7.85392	3.87127	1.59218	7.65685e-06	9.59484e-05	up
ETF1P2	2.40321	6.72957	2.80024	1.3012	7.97959e-06	9.94116e-05	up
OCLM	12.3775	30.8082	2.48904	1.19349	8.28916e-06	0.000102598	up
OTOGL	0.217085	3.45074	15.8958	2.07054	8.30197e-06	0.000102719	up
E2F1	181.679	502.823	2.76765	1.3098	8.4821e-06	0.000104608	up
STXBP5-AS1	39.3448	84.6418	2.15128	1.03061	8.638e-06	0.00010634	up
RNU6-1016P	7.41747	20.1285	2.71366	1.28259	8.65081e-06	0.00010646	up
TUBA8	13.6719	35.4138	2.59027	1.23546	8.71285e-06	0.000107146	up
OR52N4	8.82321	18.8083	2.13168	1.01806	8.85263e-06	0.000108632	up
VAC14-AS1	3.8936	10.5133	2.70014	1.28059	8.97493e-06	0.000109975	up
INSL6	8.46988	20.7508	2.44995	1.17527	9.08412e-06	0.000111115	up
SLA2	891.471	1897.59	2.1286	1.02145	9.10716e-06	0.000111317	up
DNAH2	5.68363	14.8417	2.61131	1.24337	9.13962e-06	0.000111634	up
TRIM40	4.44352	15.5196	3.49263	1.51443	9.20115e-06	0.000112306	up
ATP5PDP4	16.1092	46.261	2.87171	1.34091	9.29967e-06	0.000113347	up
TTLL7	18.3084	50.1846	2.74107	1.29329	9.45481e-06	0.000114871	up
IGKV1D-13	3.25268	12.8794	3.95963	1.6153	9.5225e-06	0.000115611	up
MIR3192	0.565135	3.33205	5.89603	1.82177	9.70351e-06	0.000117228	up
POLQ	22.2809	54.623	2.45155	1.18476	9.80221e-06	0.000118212	up
RRM2P3	14.4124	31.7907	2.20579	1.04942	9.99511e-06	0.000120243	up
CCDC150	7.64481	17.2069	2.25079	1.09713	1.03393e-05	0.000123646	up
MSR1	83.3837	187.376	2.24715	1.08338	1.0408e-05	0.000124337	up
CHRNA2	11.3427	41.8986	3.69387	1.56029	1.04427e-05	0.000124666	up
RNA5SP78	4.6851	10.4794	2.23676	1.05647	1.05524e-05	0.000125801	up
TMEM158	102.637	304.074	2.96261	1.37191	1.08079e-05	0.000128489	up
TRBV7-4	15.2867	47.8245	3.1285	1.4181	1.09803e-05	0.000130132	up
RPS29P16	0.896199	4.11159	4.58781	1.69507	1.10786e-05	0.000131116	up
SNORD71	0.299835	2.27548	7.58911	1.8923	1.1537e-05	0.000135792	up
MCOLN3	11.6498	28.9122	2.48179	1.18788	1.16588e-05	0.00013699	up
COL19A1	42.4908	107.837	2.53788	1.21567	1.17128e-05	0.000137484	up
CRNDE	2.49484	7.02314	2.81507	1.29312	1.19694e-05	0.000140208	up
IQUB	2.23288	6.45471	2.89075	1.32	1.22455e-05	0.000142903	up
NKAIN2	1.87184	9.57298	5.11421	1.75616	1.24376e-05	0.000144754	up
COL10A1	5.74404	16.6502	2.8987	1.33148	1.2534e-05	0.00014575	up
TCF3P1	17.9072	41.3684	2.31016	1.10934	1.26773e-05	0.000147094	up
OR56B2P	1.46887	4.75954	3.24027	1.42074	1.2868e-05	0.000148904	up
SEC62-AS1	3.04509	8.31104	2.72932	1.27133	1.30517e-05	0.000150776	up
KIF18A	13.3794	28.2459	2.11114	1.01218	1.31046e-05	0.000151234	up
VCAM1	3.61365	13.1419	3.63673	1.53912	1.31391e-05	0.00015153	up
RNU7-75P	2.66277	11.1018	4.16929	1.62918	1.3242e-05	0.000152615	up
ENAH	7.08494	16.9144	2.38738	1.15062	1.32672e-05	0.000152854	up
SAMD14	75.3378	309.834	4.11259	1.63326	1.33598e-05	0.000153869	up
C1orf116	14.4968	40.5294	2.79575	1.30866	1.3666e-05	0.000156868	up
CXCL10	32.1491	87.9679	2.73625	1.29269	1.38513e-05	0.00015873	up
GRASP	322.793	833.458	2.58202	1.23239	1.38738e-05	0.000158905	up
EDN2	0.453295	3.01221	6.64513	1.85239	1.44251e-05	0.000164263	up
MSRB3	70.5715	170.449	2.41527	1.15936	1.44911e-05	0.000164851	up
PTPRN	17.2897	51.7206	2.99141	1.37508	1.45322e-05	0.000165264	up
XXYLT1-AS2	5.53211	14.3769	2.5988	1.23505	1.49769e-05	0.000169814	up
RPS2P41	1.29858	4.32582	3.33119	1.44002	1.50207e-05	0.000170254	up
KLHL14	82.1956	173.147	2.10653	1.00728	1.50716e-05	0.000170662	up
MT-TM	158.053	493.404	3.12176	1.41397	1.51161e-05	0.000171109	up
VIL1	75.563	187.555	2.48211	1.1887	1.51422e-05	0.000171234	up
RPL21P28	81.357	182.508	2.2433	1.0793	1.57988e-05	0.000177575	up
DNAH7	2.57308	7.13703	2.77373	1.27792	1.60259e-05	0.00017963	up
GDF15	7.04092	20.4505	2.90453	1.34299	1.61878e-05	0.000181099	up
RN7SL749P	1.58131	5.32646	3.36839	1.47541	1.65203e-05	0.000184509	up
MAP3K7CL	2665.91	6472.17	2.42775	1.16525	1.66401e-05	0.000185545	up
FAM198A	16.6323	44.5864	2.68071	1.26575	1.70744e-05	0.000189402	up
GOLGA8T	4.21234	9.64799	2.29041	1.09582	1.71313e-05	0.000189882	up
CNN1	10.8768	45.267	4.16178	1.62962	1.76882e-05	0.000195454	up
BDNF	1.6642	5.65003	3.39503	1.47103	1.79538e-05	0.000197942	up
KBTBD12	1.86295	8.43881	4.5298	1.67556	1.82604e-05	0.000200806	up
NPM1P26	6.15345	18.0864	2.93923	1.34999	1.8486e-05	0.000202832	up
FSTL1	63.7738	203.271	3.18737	1.42713	1.87983e-05	0.000205929	up
CREB3L1	0.175845	2.32856	13.2421	1.97179	1.91237e-05	0.000208761	up
DENND2C	21.7328	47.4037	2.18121	1.03977	1.91327e-05	0.000208792	up
AIG1	167.804	356.7	2.12569	1.01415	1.93746e-05	0.000210962	up
DEPP1	28.8363	75.7963	2.6285	1.2443	1.94611e-05	0.000211707	up
TSPAN33	792.426	1836.66	2.31777	1.11297	1.95599e-05	0.000212441	up
ATP10B	1.30433	3.72557	2.85632	1.33611	1.95821e-05	0.000212614	up
KCNRG	5.03529	11.8902	2.36138	1.11828	1.97181e-05	0.000213618	up
TNS1	124.239	290.262	2.33632	1.12108	1.99476e-05	0.00021556	up
CLSPN	18.7318	52.6544	2.81096	1.31409	2.01387e-05	0.000217165	up
LURAP1L	3.79506	12.9426	3.41038	1.47383	2.07308e-05	0.000222134	up
LIPM	3.37515	13.4702	3.99098	1.60174	2.07784e-05	0.000222575	up
HIST1H1T	2.11038	7.79234	3.69238	1.53769	2.11226e-05	0.000225471	up
MYZAP	32.5004	114.986	3.538	1.50944	2.18102e-05	0.000231577	up
LAPTM4B	53.2524	159.652	2.99802	1.36918	2.18951e-05	0.000232289	up
MTCO2P11	3.9561	10.8464	2.74169	1.28199	2.26911e-05	0.000239548	up
RNU6-644P	1.43949	5.79107	4.02301	1.5782	2.29697e-05	0.000242042	up
IGFALS	5.90489	13.5408	2.29314	1.09555	2.30397e-05	0.000242557	up
MIR3662	1.08278	4.0254	3.71764	1.51522	2.40347e-05	0.000251259	up
TGFB1I1	51.2986	153.492	2.99213	1.36539	2.43756e-05	0.000254048	up
NAP1L4P1	11.3763	32.688	2.87334	1.32616	2.45377e-05	0.00025566	up
RPL36AP15	1.65835	4.86249	2.93212	1.3071	2.51551e-05	0.000261141	up
MIR3136	1.56477	5.55358	3.54915	1.48697	2.52176e-05	0.000261711	up
MKI67	214.057	593.148	2.77099	1.29461	2.53584e-05	0.000262934	up
RNU6-484P	1.1771	5.08946	4.32372	1.621	2.55928e-05	0.000265043	up
RPS20P4	0.557242	2.76151	4.95568	1.67703	2.57541e-05	0.000266553	up
SNCA	213.666	543.97	2.54588	1.2093	2.5901e-05	0.000267831	up
ANKDD1B	8.88293	19.8168	2.23088	1.06271	2.6387e-05	0.000272118	up
APBB2	9.30673	25.1327	2.70049	1.26456	2.78554e-05	0.00028563	up
FAM20A	28.2304	88.7257	3.14291	1.40614	2.85404e-05	0.000291608	up
MIR644A	0.836386	4.30656	5.14901	1.7129	2.89043e-05	0.000294712	up
SHROOM4	6.97469	20.8302	2.98654	1.34965	2.90498e-05	0.000295932	up
PRKG1-AS1	0.671554	4.26637	6.35299	1.80409	2.92434e-05	0.000297539	up
PWAR5	42.018	103.095	2.4536	1.16832	2.93372e-05	0.000298151	up
KIF14	11.9823	31.6036	2.63753	1.2483	2.99601e-05	0.000303493	up
ANLN	13.2602	32.3525	2.43983	1.16777	3.05923e-05	0.000309258	up
FAM111B	34.6652	79.2289	2.28554	1.09434	3.07425e-05	0.000310502	up
GCOM1	29.5408	96.0461	3.2513	1.4323	3.14586e-05	0.000316988	up
OPRD1	7.69002	17.3418	2.25511	1.06784	3.17331e-05	0.000319379	up
SNORA80E	1.49939	4.36275	2.90969	1.31282	3.20317e-05	0.000321901	up
MTOR-AS1	0.53273	2.59799	4.87675	1.6805	3.204e-05	0.000321901	up
ID1	70.2013	187.753	2.67449	1.25505	3.26499e-05	0.00032688	up
ACOT1	4.09781	9.31039	2.27204	1.08975	3.29409e-05	0.00032907	up
FDX1P1	1.26277	4.22306	3.34427	1.43733	3.34075e-05	0.00033287	up
VWF	161.171	439.546	2.72721	1.27386	3.3579e-05	0.000334425	up
CBX3P9	3.22287	6.84531	2.12398	1.002	3.39842e-05	0.000338068	up
ITIH4-AS1	1.27642	4.17187	3.2684	1.41254	3.45716e-05	0.000343513	up
RNY1P12	0.920979	4.22694	4.58962	1.6473	3.48403e-05	0.000345983	up
SPDEF	1.20747	4.3215	3.57895	1.50343	3.48631e-05	0.000346109	up
PPBPP2	0.721481	3.73397	5.17542	1.70035	3.50637e-05	0.000347699	up
TWF1P1	6.01957	13.3208	2.21292	1.04544	3.50957e-05	0.000347899	up
SEC14L5	76.9972	218.536	2.83823	1.30973	3.62735e-05	0.00035732	up
MCM10	10.509	33.4411	3.18212	1.41494	3.65037e-05	0.000359071	up
HIST1H3B	6.16551	24.4461	3.96498	1.57336	3.66662e-05	0.000360463	up
CFAP161	37.6054	101.782	2.70657	1.26418	3.69212e-05	0.000362358	up
SNORA55	9.60334	22.613	2.3547	1.1174	3.73923e-05	0.000366238	up
PDGFRA	4.60064	15.9245	3.46137	1.47224	3.78313e-05	0.000369587	up
BIRC6-AS2	3.30459	7.70923	2.33289	1.09851	3.78555e-05	0.000369719	up
CDC14C	3.52867	9.17507	2.60015	1.20106	3.80302e-05	0.000371108	up
TCEA1P4	4.36785	9.82647	2.24973	1.06192	3.82035e-05	0.000372587	up
RNY1P4	0.269345	1.7324	6.4319	1.76481	3.84218e-05	0.000374397	up
SLC26A5	2.85328	7.36013	2.57954	1.19435	3.92965e-05	0.000381188	up
AFAP1-AS1	5.24956	14.4757	2.75751	1.27353	4.04061e-05	0.000389967	up
TMED10P2	1.04578	4.80539	4.59504	1.64102	4.0992e-05	0.000394844	up
PRMT1P1	1.84345	5.66491	3.07299	1.36319	4.13016e-05	0.000397269	up
RNU6-652P	0.746956	3.29348	4.4092	1.6209	4.2532e-05	0.000407391	up
TAL1	190.097	471.788	2.48182	1.17621	4.35104e-05	0.000415446	up
MAGI2-AS3	56.224	224.91	4.00025	1.57295	4.35183e-05	0.000415446	up
CPA6	0.319937	2.32545	7.26847	1.80451	4.39984e-05	0.000419446	up
AQP10	74.2075	256.349	3.45449	1.47042	4.42243e-05	0.000421365	up
MYBPC2	11.1445	28.7652	2.58112	1.21353	4.4341e-05	0.000422126	up
MTCO3P11	4.31445	13.0547	3.0258	1.3597	4.43288e-05	0.000422126	up
TEX9	17.7704	38.5954	2.17189	1.02833	4.45942e-05	0.000424301	up
EHD3	401.793	910.8	2.26684	1.07979	4.57214e-05	0.000433452	up
ILDR2	6.65896	16.3192	2.45071	1.15207	4.67138e-05	0.000440437	up
NOSTRIN	0.923665	3.41686	3.69924	1.50783	4.70586e-05	0.000442472	up
FTH1P23	14.4838	34.0486	2.35081	1.11632	4.76247e-05	0.000447427	up
CAPN11	3.46255	14.3091	4.13253	1.58022	4.77533e-05	0.000448389	up
ESPL1	33.9449	76.502	2.25371	1.07585	4.80506e-05	0.000450196	up
CXCL9	7.73166	19.2614	2.49125	1.17756	4.80362e-05	0.000450196	up
ADAMTS2	11.2985	165.625	14.659	1.91827	4.80191e-05	0.000450196	up
RN7SL2	538.178	1282.07	2.38224	1.13286	4.80715e-05	0.000450268	up
FER1L4	16.9651	47.9035	2.82366	1.30391	4.82872e-05	0.000451426	up
MAPK10	10.8731	25.8725	2.37948	1.11835	4.92431e-05	0.000458987	up
MTND4P15	7.12944	17.6479	2.47535	1.16362	4.92653e-05	0.000459069	up
RNU7-3P	3.30666	8.57238	2.59246	1.20448	4.95594e-05	0.000461309	up
OR2W3	21.8708	54.1545	2.47611	1.168	5.26977e-05	0.000487216	up
RF02271	5.5664	13.0758	2.34906	1.10383	5.33999e-05	0.000492513	up
NT5C3AP1	6.73125	16.602	2.4664	1.1516	5.35604e-05	0.000493198	up
IL22	0.54289	2.67718	4.93136	1.66217	5.44398e-05	0.000499821	up
SPTB	91.4489	236.98	2.59139	1.21503	5.72369e-05	0.000522425	up
RGMB-AS1	2.02477	7.53129	3.71958	1.50395	5.85967e-05	0.000532994	up
IFITM10	14.3239	58.0357	4.05168	1.5673	5.88243e-05	0.000534498	up
ADAMTS14	9.94706	23.8357	2.39626	1.13063	5.943e-05	0.000538717	up
APLP1	1.8435	4.80405	2.60594	1.18349	5.95384e-05	0.000539272	up
DNAJC6	9.92256	21.6945	2.18638	1.02337	6.20582e-05	0.00055929	up
CMYA5	4.57217	9.84776	2.15385	1.00967	6.25795e-05	0.000563249	up
PTPRH	1.67728	5.69574	3.39582	1.44558	6.32769e-05	0.000569226	up
MFSD1P1	1.61325	6.06289	3.75819	1.51706	6.39117e-05	0.000574335	up
KCND3	23.6059	54.0963	2.29164	1.08477	6.45377e-05	0.00057905	up
GAREM1	5.76342	14.1392	2.45327	1.15379	6.45765e-05	0.000579096	up
CETP	45.6568	102.709	2.2496	1.06527	6.49825e-05	0.00058228	up
CCNA2	50.4806	108.712	2.15355	1.02219	6.54326e-05	0.000585796	up
STAM-AS1	0.472767	2.02048	4.27375	1.59556	6.54207e-05	0.000585796	up
PDGFA	19.9617	48.4799	2.42864	1.14578	6.61557e-05	0.000591557	up
CETN4P	2.57672	8.55373	3.31962	1.41147	6.6377e-05	0.000593071	up
CR1L	2.15221	7.1868	3.33927	1.41702	6.72603e-05	0.000599403	up
RNU1-100P	1.25489	4.33531	3.45473	1.47705	6.82376e-05	0.000606537	up
SEPT7P6	1.64571	7.92907	4.81803	1.64824	6.93527e-05	0.000614697	up
IL21-AS1	1.4554	4.76154	3.27164	1.41925	7.13257e-05	0.000630068	up
SCN11A	2.68042	13.9233	5.19443	1.68244	7.1743e-05	0.000632134	up
MAP1A	163.681	410.11	2.50554	1.17823	7.19205e-05	0.000633211	up
TMSB4XP4	5.70438	15.6761	2.74808	1.26855	7.30174e-05	0.000641708	up
H19	0.491915	5.61732	11.4193	1.85501	7.32276e-05	0.000643225	up
TNFRSF12A	48.8999	139.677	2.85639	1.30158	7.4121e-05	0.000650075	up
RDH12	1.38917	4.03208	2.90251	1.30128	7.4378e-05	0.000651995	up
LRRC71	2.31419	7.73788	3.34367	1.42572	7.45822e-05	0.000653285	up
TUBB8P2	0.402189	1.98136	4.92645	1.64234	7.53154e-05	0.00065853	up
KIF15	18.9245	42.6865	2.25562	1.07491	7.68249e-05	0.000669171	up
TCAF2C	1.00291	3.41961	3.40969	1.40739	7.73347e-05	0.000672928	up
PTPRF	24.7072	71.1545	2.87991	1.30441	7.94821e-05	0.000689486	up
MACROD2	54.2748	125.221	2.30716	1.09192	7.95781e-05	0.000689824	up
RTP5	57.0205	121.227	2.12602	1.00373	8.02312e-05	0.000694257	up
MATN1	11.6794	28.7449	2.46117	1.15422	8.0342e-05	0.000694866	up
RGS13	4.65257	11.6552	2.50511	1.18354	8.04757e-05	0.000695677	up
TSIX	3.91677	10.392	2.65321	1.22514	8.17923e-05	0.000705808	up
SCARNA5	1.51602	5.19962	3.42978	1.42613	8.46652e-05	0.000726579	up
ACCSL	0.712127	6.54627	9.19257	1.81423	8.53426e-05	0.000731112	up
MT1M	0.173225	1.86697	10.7777	1.81115	8.66969e-05	0.000741234	up
DUSP8	176.317	414.709	2.35206	1.11128	8.70736e-05	0.000743437	up
GPRC5D-AS1	4.99198	13.8519	2.77484	1.25165	8.71321e-05	0.000743657	up
OR7E94P	33.2286	89.2764	2.68674	1.24092	8.78749e-05	0.000749066	up
MLXIPL	1.51242	10.0392	6.63788	1.74716	8.87985e-05	0.000756562	up
TOP2A	77.9502	205.801	2.64016	1.2263	9.00268e-05	0.000766096	up
HBD	13.389	70.3208	5.25215	1.67482	9.14208e-05	0.000776398	up
DUBR	14.2988	31.2535	2.18575	1.02141	9.26136e-05	0.000784198	up
IGKV1D-8	4.15919	11.5241	2.77075	1.26902	9.25979e-05	0.000784198	up
GNG8	28.517	77.3567	2.71265	1.24888	9.35075e-05	0.000790791	up
RPS24P8	4.05111	10.7225	2.6468	1.23117	9.44036e-05	0.000797191	up
MARK2P9	0.476578	2.11356	4.43486	1.60513	9.61177e-05	0.000809475	up
DNM1	74.9293	164.462	2.1949	1.03505	9.85706e-05	0.000827087	up
LGALSL	186.267	440.165	2.36309	1.11437	0.000100208	0.000837959	up
LMOD2	2.816	8.49414	3.01638	1.33286	0.000102389	0.000853699	up
CDKN3	15.439	32.906	2.13135	1.01357	0.000102955	0.000856963	up
CARS-AS1	1.55946	5.16637	3.31291	1.40881	0.000104182	0.000865491	up
ANKRD22	30.2806	98.0327	3.23748	1.39578	0.000104446	0.000866843	up
HIST1H1B	1.49909	5.6702	3.78243	1.49967	0.000104757	0.000869007	up
GABRE	0.548584	3.13924	5.72244	1.6804	0.000106995	0.000886069	up
CMBL	5.7281	14.6499	2.55756	1.18067	0.000107198	0.000887543	up
RNA5SP82	8.33309	17.8659	2.14397	1.00519	0.000110183	0.000909838	up
C2-AS1	0.818389	2.80989	3.43344	1.4325	0.000110821	0.000914444	up
NEK10	4.42791	9.54273	2.15513	1.01081	0.000112124	0.000923425	up
YRDCP2	1.37267	4.0245	2.93188	1.30771	0.000116235	0.000952935	up
MT-TQ	72.1929	212.923	2.94936	1.31806	0.000116448	0.000954224	up
HIST1H2BM	0.0864143	1.79946	20.8236	1.81056	0.000119174	0.000972379	up
VIP	0.470028	4.94408	10.5187	1.79776	0.000121481	0.000986279	up

## Sheet: SLE DEGs
Gene name	Count_Control	Count_SLE	Fold change	log2 (Fold change)	Pvalue	FDR	Type
CCR3	189.118	10.3253	0.0545969	-3.94971	1.46905e-43	2.4694e-39	down
MS4A2	110.805	3.18981	0.0287876	-4.6337	2.74791e-39	3.0794e-35	down
CXCR2	3850.8	109.127	0.0283387	-4.60356	9.30811e-34	5.21549e-30	down
CACNG6	34.3381	0.516091	0.0150297	-5.16867	1.39572e-33	5.86536e-30	down
HRH4	40.8162	3.95416	0.0968773	-3.18781	4.09513e-31	1.25158e-27	down
CXCR1	3418.24	71.0058	0.0207726	-4.83888	3.05187e-30	7.89238e-27	down
ADGRE3	458.732	26.2597	0.0572441	-3.79733	1.47288e-29	3.09479e-26	down
PI3	290.411	0.911497	0.00313864	-5.92105	1.73285e-27	2.53289e-24	down
IL5RA	40.1717	6.08768	0.151541	-2.58686	1.76455e-25	1.79764e-22	down
AKAP12	69.6727	4.30543	0.061795	-3.65295	4.44712e-25	4.27541e-22	down
SIGLEC17P	220.388	31.712	0.143892	-2.67036	4.45103e-25	4.27541e-22	down
EPHB1	115.995	11.2142	0.0966775	-3.14697	8.56506e-25	7.99858e-22	down
MME	609.389	28.466	0.0467124	-3.94647	8.85407e-25	8.045e-22	down
ENPP3	34.6963	4.07794	0.117532	-2.90537	6.26099e-23	3.97147e-20	down
RHOXF1P1	12.0005	0.0644316	0.00536906	-4.72596	8.26583e-23	5.14609e-20	down
CLC	648.544	23.3025	0.0359305	-4.15386	1.12194e-22	6.61731e-20	down
TNFRSF10C	1385.78	49.6404	0.0358213	-4.15465	1.32137e-22	7.52933e-20	down
CACNG8	37.0252	1.79777	0.0485553	-3.82924	1.97041e-22	1.03807e-19	down
PRX	143.796	66.2947	0.461033	-1.10023	1.97616e-22	1.03807e-19	down
DPEP2	3051.08	1004.72	0.3293	-1.57362	7.4233e-22	3.15904e-19	down
CMTM2	748.273	33.6608	0.0449847	-3.92432	8.35831e-22	3.46911e-19	down
TGM3	37.1523	0.601358	0.0161863	-4.6733	9.32523e-22	3.82323e-19	down
BTG2	11952.7	2816.28	0.235619	-2.0218	1.87367e-21	7.15985e-19	down
CPA3	69.1292	4.74375	0.0686215	-3.46496	3.26628e-21	1.19358e-18	down
KRT23	251.534	7.36959	0.0292986	-4.28003	4.04294e-21	1.4615e-18	down
TNF	1102.84	208.407	0.188974	-2.30684	4.53721e-21	1.62273e-18	down
TRIM51BP	10.6778	0.13705	0.0128351	-4.44457	7.53457e-21	2.58474e-18	down
IER2	13142	2662.82	0.202619	-2.21497	9.59021e-21	3.22413e-18	down
PTGS2	3745.44	206.32	0.0550856	-3.7008	9.75583e-21	3.24734e-18	down
RPL39P3	2643.41	703.929	0.266296	-1.85707	1.99544e-20	6.38902e-18	down
HDC	425.955	23.0691	0.0541585	-3.69622	5.50368e-20	1.63742e-17	down
PLEKHG3	1959.78	628.305	0.3206	-1.60666	8.95162e-20	2.50787e-17	down
TRIM64B	9.98953	0.100536	0.0100641	-4.40536	9.47242e-20	2.63184e-17	down
KLHDC7A	6.81412	0.0966223	0.0141797	-4.08805	1.75071e-19	4.52746e-17	down
RPL6P27	1589.1	653.384	0.411166	-1.26499	3.90012e-19	9.64105e-17	down
RGS2	10318.5	1912.18	0.185316	-2.31536	1.85731e-18	3.90256e-16	down
NECAB2	47.112	2.52989	0.0536994	-3.6569	2.33675e-18	4.84934e-16	down
CEACAM19	78.6726	24.482	0.311189	-1.65161	2.63843e-18	5.4418e-16	down
MAST3	2543.41	1247.05	0.490305	-1.01868	2.80118e-18	5.70744e-16	down
TRIM51EP	13.764	0.261592	0.0190056	-4.28614	3.15232e-18	6.34598e-16	down
SLC19A1	1071.53	314.554	0.293556	-1.72082	4.3852e-18	8.6214e-16	down
FCGR3B	8010.43	218.511	0.0272783	-4.20409	6.27946e-18	1.19271e-15	down
EGR1	15015.1	2025.96	0.134928	-2.6926	6.40797e-18	1.21028e-15	down
EGR3	631.328	73.709	0.116752	-2.85703	7.94563e-18	1.43615e-15	down
EEPD1	335.373	124.586	0.371486	-1.40112	2.00175e-17	3.28277e-15	down
KY	65.038	3.0318	0.0466158	-3.73876	4.58115e-17	6.84505e-15	down
RPS13P2	85.6698	30.1634	0.352089	-1.4718	8.40332e-17	1.17225e-14	down
PHOSPHO1	1666.55	243.897	0.146349	-2.58479	1.03727e-16	1.42308e-14	down
ARAP3	1117.04	329.064	0.294587	-1.71246	1.26408e-16	1.71359e-14	down
TIGD3	96.6399	18.1479	0.187788	-2.28673	1.3126e-16	1.76513e-14	down
KIAA1324	274.026	69.6004	0.253992	-1.90269	1.89526e-16	2.45065e-14	down
NOV	30.2524	1.93712	0.0640319	-3.45431	2.14573e-16	2.72217e-14	down
CBX7	1675.03	790.777	0.472098	-1.07017	2.14452e-16	2.72217e-14	down
CCL4L2	465.63	77.2595	0.165925	-2.43008	3.49467e-16	4.25679e-14	down
FAM131B	41.0802	13.4258	0.326819	-1.57256	6.43754e-16	7.38647e-14	down
IER3	2087.7	338.458	0.16212	-2.45409	9.90553e-16	1.09906e-13	down
JUNB	31007.6	9483.85	0.305856	-1.6594	1.2402e-15	1.35371e-13	down
WLS	412.294	75.4798	0.183073	-2.30737	1.39111e-15	1.49896e-13	down
EBF4	128.47	38.304	0.298155	-1.69353	1.77664e-15	1.88419e-13	down
CCL3L1	1571.19	177.357	0.112881	-2.85591	1.8235e-15	1.9278e-13	down
EPHB3	45.7573	10.1225	0.221221	-2.06007	1.87262e-15	1.96736e-13	down
SORL1	7296.83	2930.08	0.401555	-1.293	1.97557e-15	2.04359e-13	down
FRAT2	1936.73	588.121	0.303667	-1.66757	2.56163e-15	2.61761e-13	down
GPR68	317.852	123.463	0.38843	-1.3339	2.57469e-15	2.62298e-13	down
BASP1	2034.27	541.265	0.266074	-1.83969	2.661e-15	2.70272e-13	down
ASPRV1	101.378	20.5408	0.202616	-2.17378	3.91711e-15	3.77333e-13	down
ICAM3	1245.14	475.51	0.381891	-1.36002	4.30938e-15	4.11583e-13	down
P3H4	92.0412	39.9078	0.433587	-1.17632	7.53749e-15	6.83027e-13	down
CCL3	872.532	166.914	0.191298	-2.24672	9.99311e-15	8.79472e-13	down
ATP2B1-AS1	499.473	175.939	0.352249	-1.47019	1.31809e-14	1.14503e-12	down
COL6A2	1589.33	540.145	0.339857	-1.51583	1.53988e-14	1.32742e-12	down
MBOAT7	4631.73	1359.37	0.293491	-1.70907	1.66054e-14	1.4205e-12	down
NLRP6	386.755	88.7582	0.229494	-2.02214	1.74014e-14	1.48e-12	down
HCAR2	669.844	48.7219	0.0727362	-3.25926	2.89169e-14	2.36535e-12	down
IL6R	3127.32	1508.22	0.482273	-1.03869	3.52095e-14	2.84545e-12	down
ZDHHC18	3747.9	1236.6	0.329946	-1.55374	4.76452e-14	3.74249e-12	down
SCGB3A2	13.3243	1.12627	0.0845275	-3.07491	5.96605e-14	4.57928e-12	down
KANK3	82.0672	31.5143	0.384006	-1.34231	7.87629e-14	5.93706e-12	down
LRFN1	376.058	117.821	0.313305	-1.61934	9.48417e-14	7.0698e-12	down
CXCL1	471.075	28.1272	0.0597086	-3.40633	1.01707e-13	7.51488e-12	down
BTNL8	130.479	6.28436	0.0481639	-3.56867	1.08329e-13	7.93443e-12	down
PDZD4	1398.43	447.35	0.319894	-1.59269	1.11901e-13	8.17061e-12	down
DPEP3	107.899	24.1908	0.224199	-2.04037	2.1918e-13	1.49768e-11	down
DHRS13	193.977	93.6884	0.482987	-1.03079	2.58561e-13	1.74549e-11	down
CADM4	60.5443	24.046	0.397165	-1.30132	3.61998e-13	2.38628e-11	down
LRRC4	231.247	46.9846	0.203179	-2.15874	3.99546e-13	2.61839e-11	down
SEMA4C	911.084	409.809	0.449803	-1.13341	4.13963e-13	2.70233e-11	down
RHOB	5243.64	1953.57	0.372559	-1.38916	4.78292e-13	3.09225e-11	down
PRSS22	18.6677	2.71653	0.14552	-2.53488	5.81788e-13	3.69738e-11	down
TMEM154	1477.22	659.521	0.446461	-1.14337	6.32785e-13	3.9542e-11	down
PTGDR2	137.378	21.652	0.157609	-2.44689	6.96025e-13	4.32526e-11	down
BAIAP2-DT	536.628	243.148	0.453104	-1.12447	7.62016e-13	4.70059e-11	down
EXTL3	1086.79	519.625	0.478129	-1.04823	7.7602e-13	4.76947e-11	down
CDH2	7.0987	0.805494	0.113471	-2.76908	9.46671e-13	5.67311e-11	down
TMEM272	128.966	34.997	0.271366	-1.79518	1.01527e-12	6.04114e-11	down
KIAA1257	43.7153	8.66981	0.198324	-2.17124	1.51669e-12	8.67172e-11	down
NOG	217.623	35.6789	0.163948	-2.39273	1.54947e-12	8.79929e-11	down
MAGEE1	142.625	69.2213	0.485336	-1.02165	1.93358e-12	1.08161e-10	down
AGAP1	166.411	59.6	0.35815	-1.43625	2.5103e-12	1.36559e-10	down
ST6GALNAC2	66.4344	15.3447	0.230975	-1.99517	2.97273e-12	1.6016e-10	down
CEP19	138.61	43.329	0.312597	-1.61204	3.73926e-12	1.97038e-10	down
CAMK2N1	48.1276	15.3238	0.318399	-1.58745	3.77039e-12	1.98057e-10	down
KRT81	13.4024	2.15514	0.160803	-2.4113	4.09693e-12	2.13542e-10	down
SLC4A10	146.331	34.3772	0.234927	-1.96729	4.66743e-12	2.40298e-10	down
ANXA9	238.652	111.156	0.465767	-1.08464	4.89846e-12	2.50657e-10	down
NEO1	130.739	51.5536	0.394324	-1.31209	5.15891e-12	2.63583e-10	down
DRAXIN	95.1176	28.4575	0.299182	-1.66844	7.68285e-12	3.78724e-10	down
GLI3	8.16904	1.38456	0.169489	-2.36879	9.40433e-12	4.56885e-10	down
BAIAP2	312.9	135.384	0.432675	-1.18476	9.63067e-12	4.66532e-10	down
IL4	9.1253	1.04563	0.114586	-2.70993	1.272e-11	5.98002e-10	down
NSG1	287.907	110.054	0.382257	-1.34787	1.46294e-11	6.79317e-10	down
AOC2	106.195	28.288	0.266378	-1.80932	1.57658e-11	7.23098e-10	down
AOC1	11.7267	0.554514	0.0472863	-3.38942	1.61726e-11	7.40743e-10	down
RPH3A	174.545	36.625	0.209832	-2.10035	1.68688e-11	7.69489e-10	down
SCART1	496.658	187.762	0.378052	-1.36343	1.80349e-11	8.19343e-10	down
CA8	24.886	5.35459	0.215165	-2.06361	2.17244e-11	9.66074e-10	down
CAPN5	130.101	63.1365	0.485287	-1.02683	2.75408e-11	1.20072e-09	down
RF00004	55.3623	8.43318	0.152327	-2.44181	2.78468e-11	1.21108e-09	down
SRGAP3	38.3895	14.8945	0.387984	-1.32136	3.22314e-11	1.37337e-09	down
MFSD6L	18.1331	4.96147	0.273615	-1.76735	3.42283e-11	1.4511e-09	down
RBKS	128.764	36.1465	0.28072	-1.74323	3.88894e-11	1.63868e-09	down
CXCL8	12111.2	944.13	0.0779551	-3.06383	3.94393e-11	1.65326e-09	down
EPPK1	44.5422	13.8433	0.310792	-1.60366	5.17444e-11	2.1163e-09	down
GOLGA2P10	75.5802	37.2293	0.49258	-1.00144	5.40461e-11	2.19778e-09	down
FBLN2	106.565	36.0788	0.338562	-1.50588	5.71629e-11	2.31259e-09	down
GPA33	164.141	69.7181	0.424744	-1.20343	5.78042e-11	2.3316e-09	down
CACNA2D3	127.561	35.0913	0.275095	-1.76548	5.92324e-11	2.38483e-09	down
MID1IP1	1945.54	920.564	0.473167	-1.06084	6.85063e-11	2.72558e-09	down
TEX101	6.00742	0.432485	0.0719918	-3.0195	6.98777e-11	2.77358e-09	down
PRAG1	386.358	171.548	0.444012	-1.14504	7.12649e-11	2.82032e-09	down
MAP7	49.2335	16.936	0.343993	-1.478	7.2511e-11	2.86121e-09	down
SLC45A4	942.123	355.466	0.377303	-1.36457	8.05321e-11	3.14084e-09	down
STEAP4	796.264	156.229	0.196202	-2.16504	8.16071e-11	3.16442e-09	down
G0S2	9237.13	727.282	0.0787347	-3.03699	8.7798e-11	3.38108e-09	down
AVIL	127.643	56.7916	0.444924	-1.13998	1.04219e-10	3.92796e-09	down
PLPPR2	1703.17	817.997	0.48028	-1.03995	1.09825e-10	4.10246e-09	down
FCER1A	434.142	61.0556	0.140635	-2.51626	1.10697e-10	4.12463e-09	down
KIAA0319	29.669	5.78356	0.194936	-2.15559	1.37827e-10	5.03654e-09	down
PTCH1	528.28	246.661	0.466912	-1.07758	1.40263e-10	5.11996e-09	down
COLEC12	7.54957	1.15986	0.153632	-2.43582	1.44891e-10	5.26606e-09	down
MPZL1	565.044	248.675	0.440099	-1.15704	1.55106e-10	5.59498e-09	down
MICAL2	890.096	418.286	0.469934	-1.06888	1.64051e-10	5.87978e-09	down
FEZ1	61.213	22.8784	0.373751	-1.37644	1.65893e-10	5.93948e-09	down
KIAA1211L	25.3943	7.99544	0.314851	-1.58831	1.75208e-10	6.24635e-09	down
SALL2	49.8752	21.6572	0.434228	-1.18249	2.18666e-10	7.66563e-09	down
SYT2	27.8929	8.5624	0.306974	-1.60636	2.28879e-10	7.98205e-09	down
TREM1	2242	574.342	0.256174	-1.84866	2.36452e-10	8.21206e-09	down
ORM1	29.4881	5.86765	0.198984	-2.14631	2.42828e-10	8.39015e-09	down
PCDH1	73.8403	17.847	0.241697	-1.9087	2.50399e-10	8.64288e-09	down
FAM43A	275.494	106.267	0.385732	-1.33	2.50752e-10	8.64619e-09	down
PDYN-AS1	15.5543	1.82405	0.11727	-2.68707	2.54166e-10	8.73623e-09	down
MANSC1	132.479	18.9688	0.143183	-2.48503	2.77882e-10	9.48439e-09	down
TTC9	555.741	243.475	0.438109	-1.16241	2.80951e-10	9.56968e-09	down
PRR33	1239.5	527.248	0.425373	-1.20291	3.14793e-10	1.06684e-08	down
CD4	4924.42	2260.6	0.45906	-1.10017	3.29973e-10	1.11491e-08	down
IGFBP6	14.3106	4.60226	0.321597	-1.54703	3.30885e-10	1.11687e-08	down
CSPG4P10	53.4591	24.1102	0.451003	-1.13451	3.5629e-10	1.19185e-08	down
HPGDS	7.55722	1.61971	0.214326	-1.97398	4.00959e-10	1.32415e-08	down
SIGLEC5	41.7954	12.6433	0.302505	-1.64131	4.19532e-10	1.37737e-08	down
RORC	159.752	52.4169	0.328115	-1.53564	5.01033e-10	1.61964e-08	down
CNTNAP3	138.1	4.90935	0.0355492	-3.44984	5.48319e-10	1.75896e-08	down
PLXDC1	457.043	193.704	0.42382	-1.2066	5.80861e-10	1.85099e-08	down
GHRL	76.919	29.6688	0.385714	-1.32943	5.82531e-10	1.85455e-08	down
MATK	2139.3	993.598	0.464451	-1.0834	6.15383e-10	1.94624e-08	down
PPL	47.2955	8.63076	0.182486	-2.22512	6.25551e-10	1.97284e-08	down
ITGB8	21.1632	4.66166	0.220272	-2.00286	6.64039e-10	2.08249e-08	down
AZIN2	92.7776	44.6185	0.480919	-1.03149	6.69403e-10	2.09736e-08	down
C2CD4D	27.0646	10.5239	0.388845	-1.29399	6.76818e-10	2.11862e-08	down
NPTXR	143.286	56.9537	0.397484	-1.28613	6.96026e-10	2.17267e-08	down
NCR3	428.545	202.965	0.473614	-1.05539	7.3697e-10	2.27722e-08	down
OXER1	161.882	63.993	0.395307	-1.3001	7.46283e-10	2.29755e-08	down
SPNS3	186.769	90.7251	0.485761	-1.0254	7.91628e-10	2.42384e-08	down
TSEN34	875.489	420.298	0.480072	-1.03835	8.32913e-10	2.52951e-08	down
FBLN7	45.6291	18.1	0.396676	-1.2876	8.59019e-10	2.60174e-08	down
JAML	9799.72	3969.25	0.405037	-1.26627	8.63406e-10	2.61268e-08	down
S1PR4	2824.33	1244.03	0.44047	-1.15414	9.53089e-10	2.86089e-08	down
DUSP1	36071.3	12280.9	0.340463	-1.4912	9.80529e-10	2.93017e-08	down
CKLF	66.7049	24.2931	0.364188	-1.40299	1.00618e-09	2.99882e-08	down
TGFA	124.737	28.593	0.229225	-1.96827	1.30572e-09	3.82046e-08	down
NECTIN1	306.237	117.251	0.382875	-1.3387	1.41098e-09	4.10699e-08	down
OR2I1P	6.05041	0.737594	0.121908	-2.55492	1.45165e-09	4.21443e-08	down
TNFRSF8	267.548	88.3102	0.330073	-1.53143	1.45837e-09	4.23028e-08	down
LITAF	6707.65	3061.92	0.456482	-1.10579	1.57845e-09	4.55503e-08	down
GAS1	14.7889	3.72337	0.251769	-1.82765	1.6132e-09	4.64732e-08	down
ABTB1	6603.38	2793.68	0.423069	-1.20748	1.6347e-09	4.69719e-08	down
HSPA1A	1486.28	458.224	0.308303	-1.61296	1.82335e-09	5.19044e-08	down
CRIP2	502.2	178.466	0.355369	-1.43336	2.40294e-09	6.67639e-08	down
OSM	887.738	196.556	0.221412	-2.00166	2.49478e-09	6.89171e-08	down
ZNF853	150.908	70.8816	0.469701	-1.06026	2.52868e-09	6.97389e-08	down
FZD8	11.5457	3.46267	0.299911	-1.6379	2.57331e-09	7.07954e-08	down
TMCC3	319.642	126.6	0.396067	-1.29222	3.17224e-09	8.59648e-08	down
RHOXF1P2	5.56646	0.360891	0.0648331	-2.96165	3.2333e-09	8.71695e-08	down
KLRB1	1219.78	509.297	0.417531	-1.2232	3.70213e-09	9.84668e-08	down
FGF9	14.5545	5.71266	0.392502	-1.32304	3.84408e-09	1.01759e-07	down
AOC3	83.2428	24.6215	0.295779	-1.65967	4.15283e-09	1.08396e-07	down
PHF24	6.57492	0.49905	0.0759021	-2.87991	4.24624e-09	1.10491e-07	down
KIT	26.2836	11.1953	0.425943	-1.19624	4.37912e-09	1.13597e-07	down
F2RL1	171.276	54.8886	0.32047	-1.5595	4.46598e-09	1.15583e-07	down
ABLIM2	22.1928	10.7837	0.485908	-1.03473	4.60338e-09	1.18682e-07	down
CSF2RB	4456.77	1783.88	0.400263	-1.27828	4.90673e-09	1.25635e-07	down
ORM2	138.271	59.0434	0.427011	-1.18916	5.31336e-09	1.34917e-07	down
PFN2	32.7905	14.5866	0.444842	-1.13845	5.52001e-09	1.39322e-07	down
SUMO1P1	10.8308	2.17831	0.201122	-2.08329	5.58334e-09	1.40709e-07	down
COL18A1	1508.19	552.247	0.366167	-1.39279	5.62381e-09	1.41354e-07	down
CEP126	70.6299	34.1261	0.483168	-1.02343	5.70817e-09	1.42998e-07	down
CNTNAP3C	18.9086	0.664018	0.0351172	-3.30447	5.96495e-09	1.48876e-07	down
TMEM252	4.64839	0.366566	0.0788588	-2.84639	6.30186e-09	1.56496e-07	down
MMP25	3845.86	592.35	0.154023	-2.36643	6.31525e-09	1.56688e-07	down
RNVU1-6	11.9617	3.6495	0.305098	-1.61408	7.0665e-09	1.72526e-07	down
HCAR3	267.963	32.6561	0.121868	-2.57574	7.78324e-09	1.88655e-07	down
ENTPD2	14.5405	1.42604	0.0980735	-2.73451	7.9195e-09	1.91681e-07	down
ZNF365	34.7793	11.7767	0.338612	-1.47929	8.08968e-09	1.95379e-07	down
FLT4	146.263	52.629	0.359825	-1.41563	8.6045e-09	2.0633e-07	down
AMIGO1	280.334	131.404	0.468739	-1.06533	8.80041e-09	2.10129e-07	down
TULP2	38.713	9.54714	0.246613	-1.86661	1.02107e-08	2.40556e-07	down
OTX1	13.145	0.475162	0.0361477	-3.24204	1.03636e-08	2.43987e-07	down
CSF2RBP1	9.0752	0.334929	0.036906	-3.2023	1.21587e-08	2.82685e-07	down
HSPA6	1456.91	338.965	0.232661	-1.9316	1.22286e-08	2.83722e-07	down
IGSF23	4.11085	0.284296	0.0691574	-2.83867	1.4605e-08	3.31314e-07	down
SNORD3B-1	38.1552	10.1121	0.265025	-1.77572	1.69785e-08	3.78767e-07	down
SLC46A2	188.468	61.4928	0.326278	-1.53212	1.75984e-08	3.91038e-07	down
CEACAM3	564.753	103.136	0.182621	-2.18382	1.78154e-08	3.94816e-07	down
MYBPH	14.3405	1.65898	0.115685	-2.58935	1.85368e-08	4.09185e-07	down
VNN2	2625.82	853.276	0.324956	-1.53769	1.90197e-08	4.1957e-07	down
FAM86B3P	68.2905	32.8629	0.481222	-1.03084	1.92795e-08	4.24464e-07	down
AGAP7P	136.243	47.7064	0.350158	-1.44235	2.10263e-08	4.56981e-07	down
B4GALNT3	108.844	27.5598	0.253206	-1.83117	2.1565e-08	4.66171e-07	down
GDPD3	320.509	142.354	0.444148	-1.13601	2.24772e-08	4.84397e-07	down
SMIM10L2A	33.0348	11.6575	0.352886	-1.42595	2.25243e-08	4.85102e-07	down
UBE2Q2P9	7.13217	1.00067	0.140304	-2.48804	2.38624e-08	5.11307e-07	down
C10orf105	49.8937	13.2461	0.265486	-1.781	2.50741e-08	5.34876e-07	down
LRFN2	14.4588	3.05848	0.211531	-2.01277	2.6344e-08	5.5948e-07	down
FRAT1	973.709	469.262	0.481932	-1.02845	2.73007e-08	5.78338e-07	down
DGAT2	655.217	187.944	0.286843	-1.68465	3.07506e-08	6.46128e-07	down
PMP22	16.321	4.58131	0.2807	-1.70349	3.09154e-08	6.48375e-07	down
C17orf113	26.7001	12.7378	0.47707	-1.03158	3.47047e-08	7.21099e-07	down
OPRL1	321.497	148.533	0.462006	-1.08522	3.52439e-08	7.30204e-07	down
RFPL4A	6.5451	0.343641	0.0525035	-3.00784	3.58816e-08	7.40517e-07	down
LRCOL1	7.05714	1.2721	0.180257	-2.22713	4.18823e-08	8.51809e-07	down
PACERR	6.73609	0.707872	0.105087	-2.62912	4.2414e-08	8.61061e-07	down
TMEM132C	4.68028	0.965151	0.206216	-2.02097	4.24124e-08	8.61061e-07	down
VNN3	396.801	102.982	0.259531	-1.79785	4.26532e-08	8.64351e-07	down
FKBP10	16.7582	4.95385	0.295607	-1.63043	4.79349e-08	9.60384e-07	down
RAB3D	676.842	329.272	0.486483	-1.01505	4.80879e-08	9.62874e-07	down
APBA1	21.7243	6.47361	0.297989	-1.63652	5.4647e-08	1.08006e-06	down
ALOX15	10.3871	1.72924	0.166479	-2.26914	5.59387e-08	1.1017e-06	down
FOS	35646.3	13634.4	0.382492	-1.32964	5.62274e-08	1.10674e-06	down
FAM110C	19.6268	4.76569	0.242815	-1.85082	5.87915e-08	1.14847e-06	down
CLEC9A	24.9617	6.56553	0.263024	-1.78161	5.93127e-08	1.15674e-06	down
ADAMTS5	35.9174	4.07774	0.113531	-2.57122	6.04898e-08	1.17572e-06	down
MYCL	473.653	195.598	0.412957	-1.23023	6.09747e-08	1.18355e-06	down
ADORA1	9.58058	1.92253	0.200669	-2.07844	6.59553e-08	1.27288e-06	down
CCDC170	55.9	21.5509	0.385527	-1.3176	6.71102e-08	1.29368e-06	down
FPR2	911.517	261.909	0.287333	-1.6767	6.9656e-08	1.33465e-06	down
PAQR8	395.57	160.729	0.406323	-1.24967	6.98926e-08	1.33735e-06	down
HECW2	31.6941	9.17889	0.289609	-1.67001	7.08803e-08	1.35185e-06	down
SLC45A1	17.7298	6.86494	0.387198	-1.32661	7.43612e-08	1.40922e-06	down
S100P	560.479	73.205	0.130612	-2.45891	7.97377e-08	1.50179e-06	down
FIGNL2	12.2454	5.35824	0.43757	-1.15224	8.2852e-08	1.55435e-06	down
DLEU7	36.0784	13.3647	0.370435	-1.36528	8.34656e-08	1.56412e-06	down
KCNJ15	928.99	119.388	0.128514	-2.47032	8.39876e-08	1.57303e-06	down
CYBRD1	327.523	125.919	0.384458	-1.3219	8.40531e-08	1.57338e-06	down
MEG3	32.94	6.28963	0.190942	-2.1169	9.26973e-08	1.71419e-06	down
SLC16A11	50.5845	21.6963	0.428912	-1.1711	1.04298e-07	1.89331e-06	down
CLEC4A	47.2433	19.0316	0.402843	-1.25456	1.108e-07	1.99946e-06	down
RAB36	47.1151	19.5681	0.415325	-1.21471	1.12921e-07	2.03227e-06	down
LPAR2	2298.59	1121.99	0.488121	-1.00951	1.16495e-07	2.08655e-06	down
DLGAP1-AS3	6.1977	1.38982	0.224248	-1.90445	1.17719e-07	2.10622e-06	down
RNU4ATAC	13.046	3.71719	0.28493	-1.6814	1.2549e-07	2.23692e-06	down
ZFP36	21343.4	10119.9	0.474146	-1.04804	1.28158e-07	2.27845e-06	down
SFN	52.4534	14.081	0.268447	-1.7528	1.3429e-07	2.38117e-06	down
AK5	143.867	62.2304	0.432555	-1.16973	1.46879e-07	2.57318e-06	down
NT5DC4	24.8055	7.04482	0.284002	-1.68965	1.54833e-07	2.70267e-06	down
RPL12P27	11.8827	3.06108	0.257609	-1.79839	1.56173e-07	2.72322e-06	down
DSC1	20.3572	3.84088	0.188674	-2.09842	1.57456e-07	2.74275e-06	down
TMIE	16.1245	5.57466	0.345726	-1.44387	1.69742e-07	2.93849e-06	down
TRGVA	11.4453	4.34379	0.379526	-1.32795	1.74885e-07	3.01048e-06	down
TLR9	9.39146	3.43873	0.366155	-1.37519	1.78335e-07	3.06515e-06	down
SARDH	87.0505	36.2088	0.415952	-1.2171	1.8295e-07	3.13646e-06	down
SGCD	19.9096	4.78303	0.240238	-1.87351	1.95942e-07	3.33033e-06	down
MMP28	41.2568	13.0594	0.31654	-1.54934	2.12572e-07	3.57502e-06	down
MMP25-AS1	1179.99	547.256	0.463778	-1.07614	2.13855e-07	3.593e-06	down
FAM19A1	14.7614	5.0216	0.340185	-1.4623	2.17781e-07	3.64983e-06	down
CDHR1	80.4835	36.0501	0.447919	-1.12877	2.19218e-07	3.67027e-06	down
RPGRIP1	100.542	45.9933	0.457453	-1.09488	2.19817e-07	3.67846e-06	down
MNDA	8071.17	3298.16	0.408635	-1.24028	2.3765e-07	3.93963e-06	down
GNG12-AS1	7.81918	1.98734	0.254162	-1.82068	2.63871e-07	4.32314e-06	down
BEST1	588.947	251.138	0.426419	-1.18479	2.78709e-07	4.5463e-06	down
COL5A1	18.4751	6.8377	0.370102	-1.36468	2.80608e-07	4.56465e-06	down
MIRLET7BHG	73.4221	32.0397	0.436376	-1.15077	2.80649e-07	4.56465e-06	down
TNFSF14	251.731	105.521	0.419181	-1.20519	2.98053e-07	4.8337e-06	down
TMEM132E	4.92017	1.35833	0.276073	-1.69868	3.012e-07	4.88002e-06	down
UGT2B11	9.48359	1.46513	0.154491	-2.30761	3.02617e-07	4.90062e-06	down
KRT72	357.73	141.552	0.395696	-1.2802	3.08202e-07	4.97429e-06	down
LYPD6B	6.41416	1.239	0.193165	-2.0906	3.40372e-07	5.44644e-06	down
VASH1-AS1	22.1628	9.65617	0.435693	-1.14387	3.55752e-07	5.66021e-06	down
PPFIA4	96.6672	35.608	0.368357	-1.37225	3.59653e-07	5.71957e-06	down
IFITM2	15102.7	5432.13	0.359679	-1.39819	3.61671e-07	5.74895e-06	down
TREML2	468.62	208.352	0.444608	-1.12919	3.87502e-07	6.09899e-06	down
FAM118A	2261.13	768.513	0.33988	-1.46652	3.94474e-07	6.19132e-06	down
GFRA2	48.7806	19.6928	0.403702	-1.25434	4.00011e-07	6.2607e-06	down
GDF7	58.27	26.9585	0.462647	-1.07602	4.17871e-07	6.50691e-06	down
PRSS30P	133.536	46.6795	0.349564	-1.43116	4.23936e-07	6.58914e-06	down
CACNB4	39.8394	18.5278	0.465063	-1.06485	4.38609e-07	6.77958e-06	down
ALPL	1422.9	100.51	0.0706371	-2.78089	4.52513e-07	6.96568e-06	down
PTAFR	2832.98	1241.29	0.438157	-1.14836	4.79548e-07	7.33482e-06	down
IL17RE	49.3623	23.5329	0.476739	-1.03403	5.01555e-07	7.6436e-06	down
BICDL2	23.4705	1.65225	0.0703969	-2.77082	5.08108e-07	7.72595e-06	down
ZNF835	22.4173	7.51561	0.335259	-1.46978	5.1072e-07	7.75866e-06	down
TLCD2	16.8845	7.83134	0.463819	-1.06571	5.29664e-07	8.01745e-06	down
ALG1L13P	16.652	7.51374	0.451222	-1.11237	5.54421e-07	8.36208e-06	down
B3GNT8	226.728	83.8118	0.369658	-1.3616	5.62586e-07	8.45954e-06	down
HTR6	8.08194	2.12918	0.263449	-1.73731	5.73222e-07	8.59028e-06	down
HCG27	229.194	105.698	0.46117	-1.0803	5.76158e-07	8.628e-06	down
STX3	1184.02	532.677	0.449887	-1.11353	5.78053e-07	8.64099e-06	down
MIR29B2CHG	442.066	208.069	0.470674	-1.05613	5.79998e-07	8.6662e-06	down
CSF3R	26406.5	9746.47	0.369093	-1.36389	5.84931e-07	8.73214e-06	down
C5AR1	3945.77	1438.34	0.364526	-1.37918	5.8996e-07	8.79941e-06	down
RNU6-176P	4.92906	0.733157	0.148742	-2.27757	5.92103e-07	8.81573e-06	down
FLT1P1	4.51513	0.335747	0.0743605	-2.68323	6.32516e-07	9.37178e-06	down
SOX13	221.01	108.069	0.48898	-1.00245	6.43042e-07	9.5026e-06	down
DNASE1L3	37.3072	11.9393	0.320028	-1.52763	6.71944e-07	9.89058e-06	down
MIR5684	4.42708	0.634423	0.143305	-2.30229	6.75604e-07	9.93575e-06	down
NAGS	29.8062	13.364	0.448363	-1.10847	6.87169e-07	1.0075e-05	down
REM2	389.86	163.086	0.418319	-1.20632	6.97628e-07	1.02105e-05	down
LRG1	704.13	153.756	0.218362	-1.9468	7.05591e-07	1.03046e-05	down
COLGALT2	106.32	38.7305	0.364284	-1.3761	7.22298e-07	1.05166e-05	down
PTPRN2	231.634	105.038	0.453464	-1.09982	7.68005e-07	1.11147e-05	down
ADGRD1	83.7471	37.153	0.443633	-1.1318	7.90124e-07	1.13907e-05	down
TKTL1	146.096	52.0511	0.35628	-1.4019	8.89116e-07	1.26711e-05	down
FFAR2	2680.89	549.363	0.204918	-2.00376	9.13263e-07	1.29713e-05	down
GPR27	217.243	82.6624	0.380507	-1.32316	9.63475e-07	1.36326e-05	down
SLC34A1	8.77067	2.23011	0.25427	-1.77325	9.84957e-07	1.39073e-05	down
MDS2	85.1017	32.2737	0.379237	-1.32543	1.02361e-06	1.43986e-05	down
FAM95C	17.2826	6.37894	0.369095	-1.37165	1.0472e-06	1.46997e-05	down
AMOT	51.2882	24.8354	0.484231	-1.01175	1.12032e-06	1.55959e-05	down
CHI3L1	556.441	63.8567	0.114759	-2.46381	1.14045e-06	1.58498e-05	down
ZNF781	23.0954	9.12879	0.395265	-1.25406	1.20777e-06	1.66478e-05	down
DBH	31.3827	11.3488	0.361627	-1.38887	1.21447e-06	1.67265e-05	down
FAT4	19.237	7.05532	0.366757	-1.38302	1.22916e-06	1.68941e-05	down
COL6A1	123.734	57.5889	0.465424	-1.06605	1.23879e-06	1.70056e-05	down
TRBV6-4	10.6633	2.95275	0.276908	-1.67575	1.25079e-06	1.71634e-05	down
C14orf132	23.1184	7.43827	0.321747	-1.51668	1.28564e-06	1.7577e-05	down
WNT7A	47.5862	20.0972	0.422332	-1.18917	1.3085e-06	1.78387e-05	down
CASS4	254.103	121.702	0.478947	-1.03222	1.37219e-06	1.85939e-05	down
RCN3	1051.59	495.967	0.471637	-1.04924	1.43604e-06	1.93268e-05	down
TSPEAR	8.52681	1.32203	0.155043	-2.22228	1.59433e-06	2.11356e-05	down
NAP1L2	44.1869	19.7678	0.447366	-1.1109	1.6502e-06	2.18332e-05	down
NFAM1	5627.74	2660.83	0.472806	-1.04571	1.67865e-06	2.21747e-05	down
KCNB1	11.1802	3.49206	0.312343	-1.5719	1.70209e-06	2.24314e-05	down
PPM1H	50.0499	23.564	0.47081	-1.05776	1.75329e-06	2.30069e-05	down
LUCAT1	485.348	147.008	0.302892	-1.5882	1.76791e-06	2.31808e-05	down
RASGRP4	2529.73	1212.12	0.479147	-1.02803	1.85467e-06	2.41956e-05	down
PRSS35	4.15475	0.740851	0.178314	-2.06545	1.8686e-06	2.43585e-05	down
CHL1	9.40438	2.04439	0.217387	-1.91303	2.05218e-06	2.65049e-05	down
C5AR2	623.66	284.422	0.456053	-1.09197	2.27562e-06	2.90448e-05	down
FGF22	12.558	4.70892	0.374972	-1.3286	2.37944e-06	3.02437e-05	down
MRVI1-AS1	14.7774	5.08349	0.344005	-1.44899	2.46499e-06	3.12103e-05	down
FPR1	5317.28	1934.4	0.363795	-1.37195	2.67994e-06	3.36182e-05	down
FCGR2A	3468.72	1604.52	0.462569	-1.07277	2.72366e-06	3.41539e-05	down
NRP1	56.0983	24.6198	0.438869	-1.14297	2.85088e-06	3.55636e-05	down
IRGM	9.18418	3.6442	0.396791	-1.26462	3.02078e-06	3.74054e-05	down
SPSB3	21.659	10.3247	0.476695	-1.02238	3.03111e-06	3.74919e-05	down
CDA	868.909	394.536	0.454059	-1.09629	3.13668e-06	3.85989e-05	down
VSIG1	134.934	61.512	0.455869	-1.08853	3.42901e-06	4.16789e-05	down
LRFN3	170.394	79.2918	0.465343	-1.06025	3.42913e-06	4.16789e-05	down
GPR162	464.098	224.411	0.483543	-1.01365	3.43495e-06	4.17346e-05	down
RNU5D-1	10.2727	2.89884	0.282189	-1.65186	3.56183e-06	4.31359e-05	down
ATP6V0E2-AS1	53.3759	24.9932	0.468249	-1.04299	3.70772e-06	4.46454e-05	down
RPS4XP1	8.24953	2.59035	0.313999	-1.51168	3.77572e-06	4.54153e-05	down
CEBPE	64.325	25.832	0.401586	-1.25321	3.78929e-06	4.5546e-05	down
BAIAP3	652.257	282.221	0.432684	-1.15661	3.85945e-06	4.62735e-05	down
MSRB1	2786.16	1057.58	0.379584	-1.31824	3.93353e-06	4.7128e-05	down
KRT73	110.306	43.6618	0.395823	-1.26826	4.06704e-06	4.85892e-05	down
CYP4F12	22.2307	6.04031	0.27171	-1.69797	4.3856e-06	5.19336e-05	down
ADAMTS7P1	34.7411	15.4359	0.444314	-1.11862	4.43683e-06	5.23008e-05	down
RF00017	123.706	43.2287	0.349446	-1.41757	4.46139e-06	5.25441e-05	down
ZNRF3	10.8001	4.95341	0.458644	-1.0722	4.57509e-06	5.36456e-05	down
CMTM1	44.084	17.5938	0.399098	-1.25158	4.81244e-06	5.59825e-05	down
CNFN	22.0674	10.4002	0.471293	-1.04163	4.86883e-06	5.65797e-05	down
DGKK	26.3835	8.16001	0.309284	-1.54549	5.07718e-06	5.85749e-05	down
TRBV19	130.692	59.4556	0.454928	-1.08762	5.38296e-06	6.17644e-05	down
ITGB4	38.5131	17.0443	0.44256	-1.11972	5.74102e-06	6.54928e-05	down
ADAM33	5.72584	1.69006	0.295163	-1.60802	5.74791e-06	6.55491e-05	down
ARHGAP27P2	20.9744	8.47331	0.403983	-1.22486	5.88019e-06	6.69896e-05	down
CFAP46	16.7504	5.47199	0.326678	-1.50419	5.94999e-06	6.77158e-05	down
OR52K1	13.3654	5.60355	0.419257	-1.16497	5.9803e-06	6.79458e-05	down
NFE4	52.0505	7.49487	0.143992	-2.24081	6.23471e-06	7.04554e-05	down
HNRNPA1P52	7.23849	0.60639	0.0837729	-2.5318	6.32483e-06	7.13778e-05	down
KLHL34	8.37819	3.42766	0.409117	-1.18594	6.34818e-06	7.15692e-05	down
GLT1D1	1365.98	578.737	0.42368	-1.18056	6.4452e-06	7.24686e-05	down
HAL	440.231	186.847	0.424429	-1.17811	6.48565e-06	7.28077e-05	down
S1PR3	446.516	216.186	0.484162	-1.01066	6.99375e-06	7.79327e-05	down
C2orf15	12.1511	5.48806	0.451652	-1.07282	7.37773e-06	8.18587e-05	down
COL27A1	29.4993	4.70337	0.15944	-2.16397	7.58085e-06	8.3891e-05	down
CASC8	12.9557	2.7645	0.21338	-1.90372	7.80784e-06	8.59783e-05	down
LIPN	49.7485	19.1885	0.38571	-1.29481	7.93808e-06	8.72695e-05	down
CD200R1L	3.61355	0.378375	0.10471	-2.33837	7.97821e-06	8.76535e-05	down
VSTM2B	17.4327	1.94083	0.111333	-2.37319	8.47462e-06	9.23228e-05	down
TRPM6	81.9174	11.9122	0.145418	-2.21734	8.89854e-06	9.63168e-05	down
QPCT	563.079	269.351	0.478355	-1.02494	8.91714e-06	9.6456e-05	down
NINL	127.623	50.7421	0.397594	-1.25882	9.30627e-06	0.000100054	down
PPP1R3G	13.3654	5.37837	0.402409	-1.22988	9.30589e-06	0.000100054	down
ZDHHC11B	40.6844	14.6721	0.360633	-1.36832	9.42177e-06	0.000101198	down
SOX7	6.20605	2.51962	0.405995	-1.25852	9.42178e-06	0.000101198	down
ETV3L	2.47369	0.613783	0.248125	-1.84531	1.0458e-05	0.000111086	down
TLR8	874.73	403.992	0.461848	-1.06943	1.04774e-05	0.000111257	down
TCN1	70.244	10.0681	0.143331	-2.22468	1.05481e-05	0.000111937	down
PID1	241.105	101.705	0.421828	-1.18485	1.07603e-05	0.000113866	down
DAPK2	353.12	158.941	0.450104	-1.10233	1.08448e-05	0.000114651	down
SH2D1B	539.231	223.858	0.415142	-1.20236	1.08696e-05	0.000114834	down
FBLN5	76.8236	31.5401	0.410553	-1.21046	1.11469e-05	0.000117366	down
ADGRE4P	112.933	49.1059	0.434824	-1.15003	1.12387e-05	0.000118258	down
SIGLEC7	325.728	154.454	0.474182	-1.03538	1.12462e-05	0.000118299	down
SRPX	2.02865	0.240873	0.118736	-2.15553	1.24017e-05	0.000128564	down
AJAP1	7.70494	2.19848	0.285333	-1.72715	1.24834e-05	0.000129212	down
MID2	27.148	11.5185	0.424287	-1.17741	1.27152e-05	0.000131235	down
RAI14	5.54621	1.52371	0.27473	-1.62837	1.29174e-05	0.00013313	down
RTN4RL1	8.79314	3.52429	0.400799	-1.19103	1.31561e-05	0.000135217	down
MAK	60.3089	27.0569	0.448638	-1.1043	1.32479e-05	0.000136036	down
FOXD1	5.59387	2.01536	0.360281	-1.34467	1.3389e-05	0.000137317	down
PROK2	708.733	205.681	0.290209	-1.60832	1.36686e-05	0.000139715	down
PPP1R27	9.29664	2.53614	0.272802	-1.68565	1.37374e-05	0.000140333	down
TDRD6	26.428	12.7538	0.482587	-1.00432	1.41112e-05	0.000143846	down
IL1B	1687.04	377.68	0.223871	-1.85966	1.41811e-05	0.000144471	down
EGR2	435.939	144.211	0.330805	-1.46512	1.49689e-05	0.000151683	down
KLRC2	80.533	29.1244	0.361645	-1.36177	1.59209e-05	0.000159726	down
SCARA5	7.67547	1.87215	0.243913	-1.73259	1.59413e-05	0.000159836	down
CLDN9	74.5833	21.7655	0.291828	-1.60184	1.59367e-05	0.000159836	down
MAP3K15	6.57184	2.25713	0.343455	-1.40233	1.62834e-05	0.000162539	down
CYP27A1	656.097	257.657	0.392712	-1.26721	1.63725e-05	0.000163303	down
GPR20	3.92514	0.785784	0.200193	-2.0038	1.69351e-05	0.000168394	down
TPSP2	1.77494	0.0300376	0.0169232	-2.32547	1.69604e-05	0.000168596	down
TTLL2	4.80306	1.48912	0.310035	-1.47865	1.69732e-05	0.000168657	down
MIR425	2.82706	0.575189	0.203458	-1.94699	1.70416e-05	0.000169134	down
F7	5.13843	1.40952	0.27431	-1.65723	1.73113e-05	0.000171324	down
NRCAM	42.6651	16.4059	0.384528	-1.2931	1.77423e-05	0.000175281	down
C2orf40	12.7978	5.75481	0.449672	-1.07396	1.77746e-05	0.000175548	down
SLPI	111.011	18.7183	0.168616	-2.08249	1.92803e-05	0.000188535	down
BFSP2-AS1	4.97838	1.88012	0.377657	-1.33428	1.97098e-05	0.00019212	down
PANX2	251.333	85.5039	0.340202	-1.43154	1.98938e-05	0.000193689	down
CNTNAP3P2	1.84396	0.0801129	0.0434462	-2.30347	1.99993e-05	0.000194491	down
FCGBP	749.483	354.918	0.47355	-1.03412	2.04057e-05	0.000198042	down
RTN4R	39.2742	18.8083	0.478897	-1.0043	2.12837e-05	0.000205496	down
TRAJ1	19.8386	9.53338	0.480546	-1.02256	2.19192e-05	0.000210785	down
CRLF2	6.91019	2.95067	0.427002	-1.17614	2.19712e-05	0.000211224	down
CDC42EP1	146.525	62.8248	0.428765	-1.15867	2.25251e-05	0.00021587	down
FOLR3	518.523	147.859	0.285153	-1.61593	2.43266e-05	0.000231681	down
LILRA2	2041.44	987.486	0.483719	-1.0067	2.61033e-05	0.0002463	down
AQP9	1968.93	658.584	0.334488	-1.44584	2.74277e-05	0.000257651	down
WFIKKN1	66.297	30.094	0.453926	-1.08124	2.79354e-05	0.000261977	down
TRDJ1	39.6592	17.0548	0.430034	-1.15291	2.82223e-05	0.000264439	down
FAR2P3	4.36995	0.955927	0.21875	-1.8957	2.90987e-05	0.000271591	down
ARL4AP2	2.57078	0.31033	0.120714	-2.20311	3.01765e-05	0.000280793	down
PRAP1	13.0799	6.37223	0.487177	-1.02368	3.08074e-05	0.000285793	down
CD1C	322.231	139.935	0.434269	-1.14177	3.12159e-05	0.000289343	down
SLC18A1	8.00076	2.48838	0.311018	-1.54101	3.28424e-05	0.000302418	down
XKR3	4.40981	0.695365	0.157686	-2.05422	3.33617e-05	0.000306612	down
RNU6-2	3.76504	1.04744	0.278203	-1.65375	3.45448e-05	0.000316277	down
RPS3AP43	4.99905	1.93165	0.386404	-1.27618	3.51605e-05	0.000320776	down
RNU6-833P	3.4241	1.14847	0.335408	-1.43483	3.60572e-05	0.000327801	down
LEF1-AS1	49.0547	22.9933	0.468729	-1.04517	3.7207e-05	0.000337068	down
RHEX	27.8207	10.3765	0.372977	-1.30832	3.74675e-05	0.000339082	down
CCR12P	90.4461	40.2536	0.445057	-1.10758	4.1467e-05	0.000371457	down
C18orf65	6.46225	2.70128	0.418009	-1.15938	4.24257e-05	0.000379136	down
ISM1	13.3389	5.53294	0.414798	-1.17648	4.57411e-05	0.000405103	down
SEZ6L	60.6057	20.9778	0.346136	-1.41097	4.67012e-05	0.000412194	down
RLN1	8.60736	3.38962	0.393805	-1.22681	5.04954e-05	0.000441166	down
IRF6	15.6017	6.45038	0.41344	-1.17667	5.07236e-05	0.000442929	down
PGLYRP1	238.595	48.1434	0.201778	-1.90536	5.34816e-05	0.000463641	down
NXPH4	34.4468	12.6849	0.368246	-1.32451	5.65731e-05	0.000486676	down
FAM182B	6.75276	2.10097	0.311127	-1.50728	5.71598e-05	0.000490969	down
CELA1	15.641	6.38397	0.408156	-1.22023	5.89273e-05	0.000504348	down
ALG1L11P	2.43045	0.494732	0.203556	-1.8543	5.90845e-05	0.000505307	down
SMIM25	1288.35	545.232	0.423202	-1.16704	6.49562e-05	0.000548271	down
EIF3LP2	4.6381	1.57126	0.338772	-1.43148	6.63588e-05	0.000558987	down
MIR3945HG	23.5027	7.84775	0.333908	-1.43814	6.74008e-05	0.00056677	down
C11orf45	13.2577	6.19378	0.467185	-1.03663	6.89929e-05	0.000578134	down
SIRPB3P	5.74422	2.25364	0.392331	-1.23844	7.14607e-05	0.000595547	down
CYP4F35P	45.9842	20.6389	0.448826	-1.09853	7.25309e-05	0.000602822	down
CIB3	10.5715	3.95404	0.37403	-1.30667	7.54048e-05	0.000622858	down
LILRA4	162.974	61.3778	0.376611	-1.29959	7.94172e-05	0.00065152	down
KRT86	14.2686	4.68829	0.328575	-1.45839	7.97553e-05	0.000653514	down
SYBU	14.606	5.77336	0.395273	-1.24067	7.97576e-05	0.000653514	down
FTH1P10	12.745	3.93157	0.30848	-1.51718	8.46789e-05	0.000688303	down
PLIN4	191.713	72.3275	0.377269	-1.29862	8.4739e-05	0.000688625	down
TPPP3	304.755	99.67	0.327049	-1.45384	8.49369e-05	0.000690041	down
TNFAIP6	134.101	39.8163	0.296913	-1.5484	8.88353e-05	0.000717922	down
TM4SF19	16.2622	6.35234	0.39062	-1.25331	8.95081e-05	0.000721797	down
ZNF703	715.138	295.404	0.413073	-1.193	9.30599e-05	0.000746143	down
PGA5	3.81976	0.769807	0.201533	-1.92275	9.32243e-05	0.000747283	down
OOSP3	1.94361	0.214546	0.110386	-2.06433	9.34172e-05	0.000748439	down
NRXN2	20.1351	8.34691	0.414545	-1.20352	9.36085e-05	0.000749291	down
FAM178B	9.45803	4.58332	0.484596	-0.98957	8.92531e-05	0.000720086	down
ATP1A2	1.89581	0.398919	0.210422	-1.75259	9.70711e-05	0.000773142	down
TERB2	1.84887	0.0365915	0.0197913	-2.21875	0.000100638	0.000797208	down
RPS23P10	2.77701	0.37498	0.13503	-2.08937	0.000107032	0.000839938	down
TDRG1	1.633	0.265143	0.162365	-1.92324	0.000108955	0.000853242	down
C4BPA	63.6435	3.63115	0.0570545	-2.35517	0.000110771	0.000865046	down
SPINK2	17.1507	8.34362	0.48649	-0.974306	2.22406e-05	0.000213569	down
TRAV1-2	35.8722	16.7826	0.467843	-1.02891	0.000116063	0.000901552	down
FBXL13	18.0069	7.17412	0.39841	-1.24849	0.000119049	0.000921338	down
KLRF1	704.171	344.013	0.488537	-0.998818	6.20358e-06	7.01507e-05	down
NHS	83.483	40.7926	0.488634	-0.994846	2.68875e-05	0.000252919	down
RNA5SP132	2.15405	0.495563	0.230062	-1.74294	0.000122027	0.000940921	down
ZFR2	21.3217	10.4342	0.48937	-0.973102	7.08017e-05	0.000590788	down
TPSB2	4.77685	1.28006	0.267972	-1.60013	0.000124108	0.000955434	down
CMKLR1	535.211	262.809	0.491039	-0.985919	3.60314e-05	0.000327655	down
PRRT1	36.6323	18.0159	0.491804	-0.976892	7.71898e-05	0.000635899	down
FAAHP1	90.6317	44.6083	0.492193	-0.98811	4.76186e-06	5.55478e-05	down
P2RY13	976.892	439.195	0.449584	-1.08897	0.00012463	0.000958796	down
CPPED1	2512.48	1238.62	0.492987	-0.987433	5.99921e-06	6.81377e-05	down
ADGRB2	88.544	43.656	0.493043	-0.99019	7.60358e-07	1.10138e-05	down
MPZL2	89.6568	44.2063	0.493061	-0.977962	5.5444e-05	0.00047831	down
ITPKB-IT1	15.5958	7.69521	0.493417	-0.96863	4.33625e-05	0.000386583	down
WDR86-AS1	90.4717	44.7401	0.49452	-0.973768	3.48628e-05	0.000318493	down
ZNF467	1767.59	874.99	0.49502	-0.985977	1.34544e-06	1.82684e-05	down
TLE2	250.735	124.156	0.495167	-0.985173	1.0195e-06	1.43559e-05	down
RARA-AS1	156.507	77.5117	0.495261	-0.979964	1.72891e-05	0.000171185	down
ARAP1	12329.5	6110.64	0.495612	-0.994121	1.9451e-09	5.51369e-08	down
RASA4B	12.9823	6.44169	0.496191	-0.975273	0.000119583	0.000924626	down
GPR153	114.5	56.8351	0.496376	-0.978389	9.0244e-06	9.74907e-05	down
ZMYND10	115.836	57.5507	0.49683	-0.97988	3.53319e-08	7.30968e-07	down
ARHGEF4	59.3712	29.5043	0.496946	-0.966196	0.000107371	0.000842015	down
NHSL2	1036.54	516.126	0.497933	-0.968175	3.44284e-05	0.000315467	down
TNFRSF1A	2779.61	1386.93	0.498964	-0.984409	2.86146e-09	7.81473e-08	down
ARVCF	290.529	145.031	0.499196	-0.969717	6.28312e-06	7.09786e-05	down
MSC-AS1	17.1144	34.2402	2.00067	0.960458	1.27338e-06	1.74307e-05	up
SMTNL1	80.4252	160.94	2.00112	0.970007	7.74912e-06	8.54608e-05	up
GPX4	2387.33	4782.71	2.00337	0.969973	8.4092e-06	9.17886e-05	up
PIP5K1B	75.8078	152.03	2.00547	0.976466	1.63784e-07	2.84561e-06	up
TWISTNB	165.029	331.396	2.00811	0.981225	8.85196e-08	1.64598e-06	up
F2R	570.637	1146.48	2.00913	0.969877	2.34396e-05	0.000223917	up
MAPK6	282.194	567.671	2.01164	0.98694	1.3124e-08	3.01995e-07	up
NUTF2	696.207	1400.81	2.01206	0.989644	2.1895e-09	6.14943e-08	up
ADORA2B	48.7255	98.1467	2.01428	0.965173	3.57194e-05	0.000325372	up
UBE2J1	1827.68	3683.93	2.01563	0.999606	3.29456e-14	2.67536e-12	up
B3GALNT1	6.37807	12.8615	2.01651	0.986537	7.92991e-05	0.000650709	up
DPRXP4	21.8504	44.0643	2.01663	0.963432	3.70019e-05	0.000335301	up
TOLLIP-AS1	25.3929	51.234	2.01765	0.965048	8.30303e-05	0.000677359	up
TIPARP	398.354	803.952	2.01818	0.981264	4.1418e-06	4.93595e-05	up
NT5DC2	186.929	377.312	2.01848	0.972237	7.71633e-05	0.000635899	up
MAD2L1BP	229.326	462.967	2.01881	0.993776	4.14261e-09	1.08297e-07	up
IFI27	32.4269	9021.91	278.223	6.93678	3.14836e-62	1.05845e-57	up
CENPU	32.356	197.835	6.11433	2.54565	2.16213e-37	1.81721e-33	up
OAS1	1473.18	2975.74	2.01995	0.97641	2.9847e-05	0.000278188	up
ZNF484	63.9588	129.202	2.02008	0.979305	4.72256e-06	5.5166e-05	up
KIF3C	171.89	347.933	2.02417	0.97083	0.000116794	0.000906185	up
MEF2C-AS1	31.188	63.1405	2.02451	0.975777	1.05927e-05	0.000112339	up
OTOF	122.05	4222.78	34.5987	4.56805	2.57629e-34	1.73225e-30	up
EZH2	287.626	759.897	2.64196	1.38967	1.14637e-33	5.5057e-30	up
ASPM	27.6324	203.802	7.37549	2.77636	2.20847e-32	8.24961e-29	up
IRF4	712.95	1444.59	2.02622	0.99284	3.77764e-07	5.97649e-06	up
BET1	228.436	462.928	2.02651	0.992608	2.15674e-07	3.62112e-06	up
HIST1H2BO	22.7984	1235.87	54.2084	4.9269	1.80456e-31	6.06676e-28	up
CFL2	126.401	256.662	2.03054	0.98157	3.12317e-05	0.00028941	up
NOCT	31.7527	64.4832	2.0308	0.983615	7.98951e-06	8.77202e-05	up
ICAM5	26.5877	54.1126	2.03525	0.982625	5.45066e-05	0.000471675	up
HJURP	27.6868	211.554	7.64097	2.8192	6.49798e-31	1.82046e-27	up
NDUFAF3	568.794	1158.36	2.03652	0.999501	2.54942e-07	4.1932e-06	up
MGAT4B	1993.73	4060.94	2.03685	0.993146	4.87064e-06	5.65812e-05	up
XK	71.7608	950.562	13.2463	3.47542	1.13271e-29	2.72005e-26	up
CDK1	23.2321	157.23	6.76779	2.65814	1.47249e-29	3.09479e-26	up
C1QC	17.657	352.577	19.9681	3.92012	1.11744e-28	2.20983e-25	up
BRCA2	48.3074	184.528	3.81987	1.89625	2.98757e-28	5.57995e-25	up
CTNNAL1	36.454	225.835	6.19506	2.53372	7.47402e-28	1.32247e-24	up
BUB1B	13.8412	96.3355	6.96007	2.68568	8.50692e-28	1.42997e-24	up
HIST1H4H	111.983	3123.54	27.8931	4.24192	1.10611e-27	1.77078e-24	up
EGF	87.9509	846.237	9.6217	3.08029	1.70559e-27	2.53289e-24	up
E2F7	8.07521	58.2996	7.21957	2.72659	7.48152e-27	1.048e-23	up
CDKN2B	54.3823	111.431	2.04902	0.983607	0.000124289	0.000956393	up
CAV2	17.1993	222.374	12.9292	3.42056	1.05238e-26	1.41519e-23	up
PHGDH	97.1355	199.461	2.05344	0.995655	6.39208e-05	0.000540618	up
TUBA4A	2673.59	5493.56	2.05476	0.996322	4.46842e-05	0.000397417	up
FAM83D	15.6321	58.8361	3.7638	1.87686	1.34603e-26	1.74047e-23	up
NCAPG	23.8609	152.665	6.3981	2.57491	1.93501e-26	2.40937e-23	up
IFI44L	955.191	9562.98	10.0116	3.12004	2.51623e-26	2.917e-23	up
FAM81B	6.38733	95.5385	14.9575	3.57432	2.48855e-26	2.917e-23	up
IFI44	1226.61	7932.27	6.46683	2.58053	9.4584e-26	1.05994e-22	up
PLK4	33.0417	125.867	3.80932	1.88795	1.60796e-25	1.68931e-22	up
OR2B6	12.6059	549.666	43.6038	4.58081	1.6046e-25	1.68931e-22	up
MKI67	214	1240.67	5.79751	2.43675	1.88401e-24	1.6668e-21	up
KNL1	29.2071	145.682	4.98788	2.24326	1.93604e-24	1.66892e-21	up
MCM6	286.682	783.185	2.7319	1.43061	6.09713e-24	4.99949e-21	up
ARNTL2	18.379	62.6189	3.40708	1.73483	6.45177e-24	5.16433e-21	up
ZNF367	112.111	342.299	3.05321	1.58105	6.79495e-24	5.1918e-21	up
NEXN	103.959	1360.18	13.0838	3.40074	6.77552e-24	5.1918e-21	up
USP18	94.0279	780.274	8.29833	2.87701	8.35779e-24	6.24401e-21	up
POLQ	22.2805	110.476	4.95844	2.23795	9.78669e-24	7.0004e-21	up
E2F8	8.54749	63.4543	7.42373	2.74402	1.16753e-23	8.17733e-21	up
ESPL1	33.9208	181.112	5.33925	2.33161	1.56796e-23	1.07578e-20	up
STIL	23.6743	101.176	4.27365	2.03794	3.47666e-23	2.33763e-20	up
CD38	490.797	1868.81	3.8077	1.88219	3.85109e-23	2.53862e-20	up
BAMBI	11.7659	226.942	19.2881	3.78552	1.00391e-22	6.02689e-20	up
BARD1	78.9189	192.719	2.44198	1.26915	1.21523e-22	7.04392e-20	up
FRMD3	140.759	834.613	5.92938	2.45533	1.37492e-22	7.70391e-20	up
STRIP2	20.2491	77.4024	3.82251	1.87508	1.42496e-22	7.85342e-20	up
CLIC4	413.966	1315.36	3.17746	1.63552	1.90782e-22	1.0345e-19	up
KIF14	11.9793	74.1952	6.19359	2.5172	2.27363e-22	1.17596e-19	up
RIPOR3	42.8959	303.408	7.07311	2.67176	2.36589e-22	1.20514e-19	up
FANCI	141.975	368.386	2.59473	1.3586	2.53629e-22	1.27265e-19	up
HIST1H2BN	39.4293	445.62	11.3017	3.21891	2.69381e-22	1.33181e-19	up
SUCNR1	8.47336	95.2056	11.2359	3.20669	2.7559e-22	1.34276e-19	up
PKHD1L1	42.2388	361.294	8.55361	2.8988	2.88469e-22	1.38543e-19	up
CLSPN	18.7363	98.3001	5.24651	2.3021	3.22469e-22	1.52691e-19	up
RAD51AP1	22.8144	92.4501	4.05228	1.96359	3.44814e-22	1.59912e-19	up
TTK	9.01209	60.4946	6.71261	2.61498	3.47231e-22	1.59912e-19	up
HESX1	6.33192	61.0301	9.63848	3.03603	3.56782e-22	1.6209e-19	up
TOP2A	77.9955	395.048	5.06501	2.25417	5.95795e-22	2.67067e-19	up
EPSTI1	914.354	3488.56	3.81532	1.88179	6.85816e-22	3.03374e-19	up
VEGFC	5.23803	68.8085	13.1363	3.37329	6.95553e-22	3.03686e-19	up
SPATS2L	128.144	525.838	4.10349	1.97836	7.11586e-22	3.06703e-19	up
MCM10	10.5076	74.4248	7.08298	2.67949	7.90899e-22	3.32365e-19	up
MACC1	9.82285	38.0116	3.86971	1.90399	1.01071e-21	4.09386e-19	up
TCEAL9	16.9142	187.178	11.0663	3.18729	1.02358e-21	4.09664e-19	up
PGRMC1	1413.03	8502.69	6.01733	2.46859	1.43806e-21	5.68777e-19	up
NUF2	26.6931	108.341	4.05875	1.96728	1.61828e-21	6.32615e-19	up
CHST8	21.1107	279.404	13.2352	3.37969	1.87414e-21	7.15985e-19	up
EGFL7	79.2093	896.303	11.3156	3.20896	2.17476e-21	8.21496e-19	up
HIST1H2BH	79.8644	957.893	11.994	3.27125	2.37015e-21	8.85355e-19	up
RNASE1	20.2357	326.159	16.118	3.57343	4.68337e-21	1.65737e-18	up
KNTC1	252.17	550.712	2.1839	1.11642	6.0601e-21	2.12223e-18	up
NT5C3A	936.111	4615.97	4.93101	2.21356	7.08993e-21	2.45728e-18	up
IGF2BP3	12.6232	75.8539	6.00908	2.45219	8.63356e-21	2.93184e-18	up
CENPN	33.9935	97.8947	2.8798	1.49489	1.11527e-20	3.67592e-18	up
SHCBP1	54.9844	221.598	4.0302	1.95508	1.15644e-20	3.77459e-18	up
DTL	21.6565	119.825	5.533	2.36363	1.58048e-20	5.10904e-18	up
PARPBP	15.6442	50.8772	3.25215	1.67027	2.32862e-20	7.38545e-18	up
BUB1	41.5392	212.79	5.12263	2.26321	3.38104e-20	1.05248e-17	up
MAP2	6.7198	84.8342	12.6245	3.30167	3.4836e-20	1.07445e-17	up
HIST1H2BJ	180.914	1433.17	7.92181	2.79028	3.63649e-20	1.11141e-17	up
C2orf88	575.289	3603.54	6.26387	2.50846	4.56373e-20	1.38223e-17	up
P2RY12	55.8949	342.251	6.12311	2.47894	4.67088e-20	1.40206e-17	up
ANLN	13.2623	69.366	5.2303	2.28838	5.77716e-20	1.7037e-17	up
MEIS1	99.4981	756.55	7.60366	2.73927	6.69233e-20	1.95643e-17	up
ELOVL7	121.93	952.38	7.8109	2.77016	7.72776e-20	2.22051e-17	up
CKAP2L	10.3029	52.2012	5.06664	2.25813	8.08126e-20	2.30241e-17	up
SH3TC2	33.4827	218.876	6.53697	2.55573	8.63196e-20	2.43864e-17	up
ANKRD45	0.0452525	14.8502	328.162	4.79279	1.0221e-19	2.81656e-17	up
C1QB	50.7577	513.368	10.1141	3.06157	1.11553e-19	3.04903e-17	up
ATAD2	189.42	528.843	2.79191	1.45497	1.39534e-19	3.78306e-17	up
PGAP1	76.5878	339.262	4.42971	2.06822	1.54246e-19	4.11555e-17	up
OXTR	26.6492	172.944	6.48965	2.54534	1.61997e-19	4.25482e-17	up
RIOK3	1326.84	3369.03	2.53914	1.32468	1.7103e-19	4.45726e-17	up
SLC8A3	17.4402	145.553	8.34582	2.83861	2.38258e-19	6.06818e-17	up
FAM72B	14.8686	46.1281	3.10238	1.60757	2.48525e-19	6.28207e-17	up
IGLV3-19	70.7669	890.965	12.5901	3.28819	2.81785e-19	7.06965e-17	up
XPNPEP1	837.753	2276.08	2.71689	1.41728	3.33907e-19	8.31528e-17	up
ESAM	389.039	2823.33	7.25719	2.67698	4.17708e-19	1.02503e-16	up
GATA1	60.4826	565.799	9.35474	2.96725	4.22232e-19	1.02862e-16	up
ABCC4	185.438	898.898	4.84744	2.18246	4.78755e-19	1.15793e-16	up
DYTN	13.5268	148.927	11.0097	3.13993	5.54968e-19	1.33268e-16	up
NRIR	61.7258	423.012	6.85308	2.60816	5.83029e-19	1.39013e-16	up
SPAG5	93.0578	257.469	2.76676	1.44438	6.07544e-19	1.43838e-16	up
CENPF	62.7362	288.728	4.60225	2.11836	6.38861e-19	1.49152e-16	up
MMD	952.891	4501.73	4.72429	2.14963	6.49987e-19	1.50703e-16	up
EIF2AK2	961.748	2735.79	2.8446	1.48006	7.01092e-19	1.59416e-16	up
CXCR2P1	562.61	2619.2	4.65544	2.13065	6.94704e-19	1.59416e-16	up
CALHM5	7.95572	67.6612	8.50472	2.85208	8.04153e-19	1.81442e-16	up
ARG2	18.1111	98.1584	5.4198	2.31973	9.07023e-19	2.03288e-16	up
GMNN	69.2071	190.527	2.753	1.44011	1.16077e-18	2.58437e-16	up
XIRP2	3.2781	51.4834	15.7053	3.48843	1.17268e-18	2.59372e-16	up
LGALS3BP	757.451	3239.78	4.27721	2.02105	1.29424e-18	2.84386e-16	up
ANO2	2.08117	34.4575	16.5568	3.52576	1.52363e-18	3.32616e-16	up
CENPE	25.2189	119.711	4.74687	2.15648	1.57084e-18	3.40709e-16	up
CCNA2	50.5244	214.573	4.24692	2.01468	1.68702e-18	3.63564e-16	up
CDC25A	13.4127	80.737	6.01944	2.45815	1.71734e-18	3.67741e-16	up
TFPI	15.5222	121.35	7.8178	2.75706	1.7586e-18	3.74192e-16	up
FGF2	4.42837	42.3103	9.55438	2.97296	1.7978e-18	3.80127e-16	up
CIT	29.7358	100.796	3.38973	1.72084	2.14869e-18	4.48675e-16	up
SPARC	3810.43	22056.7	5.78849	2.39896	2.7854e-18	5.70744e-16	up
TYMS	28.9418	132.145	4.5659	2.10706	2.89537e-18	5.86383e-16	up
PTK2	159.393	573.285	3.59668	1.79179	3.24125e-18	6.48616e-16	up
TSC22D1	906.767	4413.28	4.86705	2.18322	3.6922e-18	7.34486e-16	up
MT1G	0.8061	84.4332	104.743	4.6404	4.05846e-18	8.02596e-16	up
MYCT1	14.7924	176.917	11.9599	3.21043	4.50407e-18	8.80362e-16	up
CDC45	27.8908	142.321	5.10278	2.24911	4.59157e-18	8.92278e-16	up
NCAPH	32.7795	136.878	4.17571	1.9918	5.2928e-18	1.02264e-15	up
E2F2	245.723	738.475	3.00532	1.55433	5.7166e-18	1.09821e-15	up
CRYM	11.6457	122.107	10.4852	3.07378	5.82728e-18	1.11311e-15	up
MCPH1-AS1	25.6196	114.508	4.46954	2.07048	6.48801e-18	1.21855e-15	up
MAOB	4.91397	85.4135	17.3818	3.55784	6.55214e-18	1.22376e-15	up
SERPINE1	18.7624	174.933	9.32356	2.94479	6.62062e-18	1.22665e-15	up
HIST1H2AG	122.467	741.922	6.05814	2.45034	7.43592e-18	1.36606e-15	up
ZC3HAV1L	34.6225	177.713	5.1329	2.24706	7.94163e-18	1.43615e-15	up
MT1E	36.9505	382.589	10.3541	3.05736	7.86412e-18	1.43615e-15	up
CEP55	15.7501	102.217	6.48995	2.53767	8.2145e-18	1.47681e-15	up
ETFA	720.645	2409.56	3.34361	1.69515	9.2252e-18	1.64969e-15	up
CMTM5	296.646	2254.33	7.5994	2.71548	9.71097e-18	1.72737e-15	up
IL10	2.98026	38.2734	12.8423	3.26906	9.89784e-18	1.75134e-15	up
ASS1P1	7.9899	48.7683	6.10374	2.44823	1.02891e-17	1.81104e-15	up
LNCAROD	10.0156	101.572	10.1414	3.02904	1.16134e-17	2.01253e-15	up
HIST1H2AE	82.5815	1013.91	12.2777	3.2288	1.28148e-17	2.20934e-15	up
XRCC2	18.625	73.9322	3.96952	1.91817	1.3206e-17	2.26517e-15	up
BTG3	97.9002	323.143	3.30074	1.67693	1.33724e-17	2.28207e-15	up
KCNN3	13.8961	81.0008	5.82904	2.41076	1.39586e-17	2.37008e-15	up
INKA1	61.4462	540.676	8.79917	2.87752	1.44889e-17	2.44775e-15	up
ODC1	1306.8	4142.94	3.17031	1.6236	1.52241e-17	2.55718e-15	up
MELK	16.9795	88.8198	5.23101	2.27989	1.53648e-17	2.55718e-15	up
PCYT1B	37.7848	276.719	7.32357	2.67051	1.53277e-17	2.55718e-15	up
GUCY1B1	110.386	777.26	7.04132	2.62446	1.58052e-17	2.61752e-15	up
HERC6	400.631	1309.45	3.26846	1.66431	1.98394e-17	3.26951e-15	up
RAD54L	13.8276	55.3809	4.00509	1.94148	2.037e-17	3.32437e-15	up
HIST1H4K	8.06287	50.6114	6.27709	2.48268	2.25884e-17	3.66859e-15	up
GMPR	266.118	1633.68	6.13895	2.46217	2.31067e-17	3.73473e-15	up
SMOX	735.88	4489.88	6.10138	2.45467	2.38716e-17	3.8399e-15	up
ESCO2	9.93057	46.7079	4.70345	2.14333	2.53222e-17	4.05384e-15	up
MAIP1	60.207	127.447	2.11681	1.0698	2.5857e-17	4.11506e-15	up
RGS10	1269.79	5272.24	4.15207	1.97683	2.59494e-17	4.11506e-15	up
CHEK1	61.2374	190.265	3.107	1.60016	2.62914e-17	4.14972e-15	up
FAM225A	9.303	80.6497	8.66922	2.85377	3.31746e-17	5.21167e-15	up
MTMR2	168.768	341.95	2.02615	1.00583	3.37968e-17	5.28472e-15	up
CMPK2	398.477	2150.23	5.39614	2.30495	3.44183e-17	5.35699e-15	up
FAXDC2	309.109	1932.12	6.25063	2.48144	3.68963e-17	5.71621e-15	up
CMC2	275.805	813.73	2.95039	1.52591	3.7991e-17	5.8588e-15	up
PTGFR	1.45609	24.1304	16.5721	3.48444	3.84337e-17	5.90001e-15	up
EIF2AK1	1891.1	6456.59	3.4142	1.72111	3.97852e-17	6.07973e-15	up
E2F1	181.37	1099.32	6.06118	2.44496	4.07572e-17	6.20007e-15	up
HIST1H2BK	363.501	2285.56	6.28762	2.48793	4.22631e-17	6.38028e-15	up
CLEC1B	195.026	1484.01	7.60929	2.70877	4.23214e-17	6.38028e-15	up
LAPTM4B	53.2425	410.624	7.71234	2.72338	4.50724e-17	6.76468e-15	up
RHOBTB1	107.292	571.114	5.323	2.2862	4.93563e-17	7.30973e-15	up
NUSAP1	14.9913	56.6831	3.78105	1.86823	5.0685e-17	7.4736e-15	up
NET1	110.977	514.984	4.64046	2.11556	6.33024e-17	9.21283e-15	up
MIR34AHG	6.05489	40.8281	6.74301	2.57012	6.78902e-17	9.83794e-15	up
SKA1	16.3477	87.962	5.38069	2.30862	6.87153e-17	9.91477e-15	up
HIST1H2AI	9.06279	108.329	11.9532	3.18012	7.82085e-17	1.11885e-14	up
CYP19A1	0.339886	15.6463	46.0339	4.15899	7.90105e-17	1.12553e-14	up
ORC6	47.1454	128.338	2.72218	1.42017	8.06198e-17	1.14044e-14	up
KIF11	64.7233	248.972	3.84672	1.87863	8.07358e-17	1.14044e-14	up
TMEM40	269.591	1596.29	5.92115	2.41385	8.17741e-17	1.15028e-14	up
MCM4	223.783	725.218	3.24072	1.65195	8.23624e-17	1.15373e-14	up
TRIM22	4578.74	9902.39	2.16269	1.09982	9.08726e-17	1.25722e-14	up
WASF1	41.226	233.73	5.66947	2.35886	1.04131e-16	1.42308e-14	up
PARD3	40.1247	231.505	5.76963	2.3795	1.07363e-16	1.46131e-14	up
PTCRA	347.822	2347.06	6.74786	2.56531	1.31209e-16	1.76513e-14	up
SMIM3	322.136	1561.24	4.84651	2.16785	1.33974e-16	1.79445e-14	up
NAT8B	37.0536	374.987	10.1201	3.00933	1.35108e-16	1.80245e-14	up
DAB2	285.24	1559.26	5.46648	2.31549	1.37519e-16	1.82737e-14	up
ARHGAP6	96.1624	593.303	6.16981	2.45952	1.40046e-16	1.85362e-14	up
EXO1	13.2271	64.2272	4.85573	2.18044	1.56666e-16	2.0574e-14	up
LRP8	199.042	403.071	2.02506	1.0053	1.70042e-16	2.22437e-14	up
MED12L	39.0485	164.256	4.20646	1.98606	1.77247e-16	2.30964e-14	up
ERICH3	5.15458	54.1014	10.4958	3.03863	1.83562e-16	2.38269e-14	up
RSU1	1259.24	4716.97	3.74589	1.83994	1.918e-16	2.47055e-14	up
PBK	6.13888	44.9041	7.3147	2.67697	1.95664e-16	2.5107e-14	up
LY6G6F	30.967	183.005	5.90969	2.40634	1.96849e-16	2.51629e-14	up
TMEM45A	7.94909	62.79	7.89901	2.73911	2.17635e-16	2.75062e-14	up
PDCD10	417.341	1263.66	3.02789	1.559	2.28894e-16	2.88209e-14	up
ABLIM3	303.634	2173.3	7.15761	2.62929	2.454e-16	3.0784e-14	up
MYL6B	74.3457	165.02	2.21963	1.14092	2.54808e-16	3.18453e-14	up
ACCSL	0.709756	17.7177	24.9631	3.75052	2.94586e-16	3.65449e-14	up
PDE2A	29.512	244.32	8.27867	2.78981	2.98939e-16	3.68133e-14	up
GEN1	183.985	402.39	2.18709	1.11511	3.12544e-16	3.83483e-14	up
FHL2	49.3262	258.529	5.24121	2.26082	3.53367e-16	4.27647e-14	up
HIST1H2AC	2368.04	12453.1	5.25883	2.26482	3.95913e-16	4.77068e-14	up
PPBP	2770.61	15159.8	5.47164	2.31247	4.29598e-16	5.15809e-14	up
KIF15	18.9315	77.8493	4.11216	1.96682	4.49755e-16	5.36182e-14	up
PDE5A	197.067	851.77	4.32224	2.02072	4.48763e-16	5.36182e-14	up
TTC7B	131.404	823.107	6.26395	2.47207	4.56408e-16	5.40281e-14	up
KIFAP3	174.805	650.428	3.72088	1.82933	4.7331e-16	5.58323e-14	up
ACRBP	1074.41	5770.64	5.37099	2.28938	5.15694e-16	6.04081e-14	up
DIAPH3	4.31321	24.6147	5.70681	2.38754	5.47491e-16	6.39101e-14	up
ELL2	289.126	887.789	3.0706	1.57755	5.57543e-16	6.48582e-14	up
SPAG6	1.55517	20.6915	13.305	3.27769	5.99241e-16	6.94686e-14	up
SYTL4	16.5123	113.726	6.88736	2.57571	6.2449e-16	7.18998e-14	up
MTHFD2L	131.371	367.983	2.8011	1.45139	6.54784e-16	7.48748e-14	up
C12orf75	538.155	1698.35	3.15588	1.61277	7.30513e-16	8.32513e-14	up
KIF18A	13.4013	49.0031	3.65659	1.80696	7.83847e-16	8.87278e-14	up
SIGLEC1	1319.65	9454.46	7.16439	2.6235	7.98302e-16	9.00608e-14	up
HIST1H2BL	2.37783	30.0264	12.6277	3.21442	8.43741e-16	9.48687e-14	up
CDCA2	12.8494	69.7402	5.42752	2.31107	8.66261e-16	9.70761e-14	up
PRKG1	4.45059	41.3087	9.28162	2.89626	9.55698e-16	1.06743e-13	up
KIF18B	27.0177	135.113	5.00088	2.20517	9.60991e-16	1.06979e-13	up
C12orf76	291.205	1040.08	3.57163	1.77482	1.0495e-15	1.15561e-13	up
SLCO4A1	24.7491	91.745	3.707	1.82827	1.05184e-15	1.15561e-13	up
LANCL3	33.7568	176.483	5.22807	2.25162	1.31654e-15	1.43239e-13	up
KIAA1211	8.48341	61.5698	7.25768	2.62378	1.35651e-15	1.46639e-13	up
DERA	256.508	773.271	3.01461	1.55045	1.42023e-15	1.52545e-13	up
TRIM58	288.52	1763.24	6.1113	2.43709	1.64042e-15	1.75634e-13	up
ORC1	25.1818	101.229	4.01993	1.93353	1.70669e-15	1.8215e-13	up
PLOD2	10.5004	71.8527	6.84288	2.5626	1.716e-15	1.82564e-13	up
TRPC6	6.32337	48.6676	7.69646	2.69329	1.84966e-15	1.94933e-13	up
CCDC150	7.64913	28.9629	3.78643	1.86116	1.89941e-15	1.98558e-13	up
BMP6	190.101	1019.14	5.36103	2.28158	1.90768e-15	1.98558e-13	up
OSBP2	152.004	1264.45	8.31854	2.78113	1.90429e-15	1.98558e-13	up
C5orf30	76.32	348.058	4.56051	2.08397	1.94164e-15	2.01469e-13	up
HIST1H3H	694.339	5301.53	7.63536	2.68742	2.23455e-15	2.3044e-13	up
FER1L4	16.9496	195.87	11.556	3.1164	2.24518e-15	2.30828e-13	up
GP6	101.834	608.619	5.97658	2.40905	2.26195e-15	2.31843e-13	up
PF4	3338.51	16633.3	4.98224	2.19195	2.74162e-15	2.77399e-13	up
HIST2H2BE	1065.43	6319.53	5.93145	2.39997	2.74767e-15	2.77399e-13	up
HIST1H2BD	122.933	860.714	7.00147	2.58917	3.20836e-15	3.2294e-13	up
WDFY1	709.452	1774.23	2.50085	1.29798	3.27871e-15	3.29036e-13	up
PSMA6	90.8163	210.512	2.318	1.19021	3.31965e-15	3.32153e-13	up
PTPN12	1863.54	6251.94	3.35487	1.69127	3.36128e-15	3.3532e-13	up
ARHGEF12	425.852	1539.65	3.61546	1.78822	3.38051e-15	3.36241e-13	up
RUFY4	125.083	702.701	5.61789	2.33507	3.44544e-15	3.40683e-13	up
SMIM1	17.4015	161.9	9.30376	2.89486	3.44226e-15	3.40683e-13	up
PRKAR2B	1204.5	6068.75	5.03841	2.20453	3.51258e-15	3.46303e-13	up
RN7SL834P	28.3352	100.005	3.52934	1.75193	3.5464e-15	3.48546e-13	up
TTLL7	18.2949	125.377	6.85311	2.56114	3.55606e-15	3.48546e-13	up
RGS18	1792.41	9899.24	5.52287	2.31456	3.6462e-15	3.56342e-13	up
LRP12	33.0045	164.616	4.98769	2.18855	3.86093e-15	3.75147e-13	up
ARHGAP18	260.973	804.38	3.08223	1.57806	4.1065e-15	3.93324e-13	up
IGHV3-33	88.5972	801.9	9.05108	2.86375	4.33656e-15	4.13005e-13	up
IGHV1-24	17.1158	189.663	11.0812	3.06605	4.5167e-15	4.28947e-13	up
TRIP13	17.6674	73.8039	4.17739	1.98251	5.63127e-15	5.33289e-13	up
LY6E-DT	8.6516	30.7508	3.55434	1.76839	5.67849e-15	5.3625e-13	up
C16orf87	142.264	350.67	2.46493	1.27695	5.73832e-15	5.40383e-13	up
CCDC173	1.4872	20.1609	13.5563	3.23244	5.8878e-15	5.52911e-13	up
HMMR	14.0999	63.9477	4.53532	2.08232	5.93403e-15	5.55699e-13	up
CDCA7	86.4967	260.948	3.01685	1.55142	5.98665e-15	5.5907e-13	up
GP1BA	235.233	1414.07	6.01135	2.41117	6.03408e-15	5.61938e-13	up
KIF4A	11.771	59.5006	5.05485	2.21814	6.09376e-15	5.65928e-13	up
PDLIM1	847.073	3515.56	4.15025	1.96315	6.22337e-15	5.76373e-13	up
CGRRF1	130.888	354.532	2.70866	1.40439	6.3478e-15	5.86282e-13	up
AREG	14.816	190.268	12.8421	3.19771	6.71425e-15	6.16738e-13	up
VEPH1	32.0506	187.343	5.84523	2.37492	6.8391e-15	6.26495e-13	up
SELP	181.326	1047.87	5.77895	2.36443	7.23103e-15	6.57027e-13	up
IGLV3-25	69.5872	747.904	10.7477	3.03022	7.85325e-15	7.09727e-13	up
IGLV3-1	79.2816	813.617	10.2624	2.98421	8.22845e-15	7.41642e-13	up
CDKN2C	103.253	208.493	2.01924	1.0062	8.33474e-15	7.48761e-13	up
SSX2IP	211.148	713.51	3.3792	1.69808	8.35199e-15	7.48761e-13	up
SMIM5	170.079	1053.85	6.19623	2.44449	8.76871e-15	7.79882e-13	up
RRM2	87.1441	462.367	5.30578	2.26506	8.99083e-15	7.97527e-13	up
RUFY1	1296.8	4783.83	3.68895	1.81225	9.85707e-15	8.69776e-13	up
IGKV5-2	5.35483	70.5773	13.1801	3.21575	1.0284e-14	9.02707e-13	up
NEK2	10.7209	47.9181	4.46959	2.07367	1.04659e-14	9.16284e-13	up
KLHDC7B	216.396	1032.97	4.77351	2.13434	1.19713e-14	1.04536e-12	up
PTGS1	2255.39	10087.2	4.47249	2.05419	1.26638e-14	1.10297e-12	up
GTSE1	29.4738	125.139	4.24579	1.99523	1.41072e-14	1.22235e-12	up
MAN1A1	872.798	1762.72	2.01962	1.00268	1.46437e-14	1.26557e-12	up
CAV1	11.5474	70.8447	6.13513	2.43577	1.61318e-14	1.38705e-12	up
CDKN3	15.4256	61.5305	3.98886	1.92504	1.6603e-14	1.4205e-12	up
IGLV3-21	58.9052	737.54	12.5208	3.16363	1.67334e-14	1.42782e-12	up
CDC42BPA	23.0442	93.0998	4.04006	1.92015	1.7433e-14	1.48e-12	up
NCKAP1	78.7752	333.026	4.22755	1.98097	1.84091e-14	1.55502e-12	up
P2RY1	49.7895	222.944	4.47773	2.05174	1.90059e-14	1.60141e-12	up
MCUR1	345.48	1098.94	3.18091	1.61776	2.02914e-14	1.70544e-12	up
F2RL3	38.0579	228.641	6.0077	2.40254	2.19952e-14	1.83944e-12	up
IGKV1-33	21.2535	294.377	13.8508	3.24711	2.50455e-14	2.08417e-12	up
FNBP1L	27.0191	140.125	5.18614	2.22671	2.52445e-14	2.09555e-12	up
NDC80	58.568	167.321	2.85686	1.4814	2.75803e-14	2.27819e-12	up
HIST1H1T	2.10997	24.8466	11.7758	3.09718	2.78923e-14	2.29832e-12	up
DNM3	92.7813	395.227	4.25977	1.98983	2.86293e-14	2.34753e-12	up
NDUFA6	674.431	2048.54	3.03743	1.55703	2.97005e-14	2.42355e-12	up
IGKV1-8	17.9372	277.867	15.4911	3.33511	3.45169e-14	2.7962e-12	up
MEIS3P2	2.02533	25.2582	12.4711	3.12628	3.6415e-14	2.93582e-12	up
HIST1H4I	178.289	905.258	5.07748	2.20411	3.66355e-14	2.94653e-12	up
GP9	425.977	2651.62	6.2248	2.44073	3.79174e-14	3.04235e-12	up
ARHGAP11A	83.9172	191.897	2.28674	1.17586	3.85549e-14	3.0788e-12	up
IGHV3-11	29.7097	273.536	9.20697	2.85931	4.024e-14	3.20576e-12	up
IGKV1-39	66.8991	591.414	8.8404	2.81734	4.35682e-14	3.4627e-12	up
IGLV6-57	62.0371	654.789	10.5548	2.9913	4.65422e-14	3.68165e-12	up
PCSK6	144.538	917.977	6.3511	2.46145	4.68443e-14	3.69685e-12	up
MTHFD1L	64.1281	148.018	2.30817	1.19003	4.72898e-14	3.72327e-12	up
EIF4E	282.991	582.439	2.05815	1.02684	4.79563e-14	3.75571e-12	up
BRIP1	26.481	70.0712	2.64609	1.37509	4.8037e-14	3.75571e-12	up
VSIG10L	21.6377	69.7426	3.2232	1.63184	5.32811e-14	4.14643e-12	up
CDC6	31.7965	142.394	4.4783	2.05592	5.72605e-14	4.43558e-12	up
CD109	28.7464	89.611	3.1173	1.58585	5.7894e-14	4.47434e-12	up
DBF4	157.536	371.978	2.36122	1.21686	5.84167e-14	4.50439e-12	up
MAP4K5	413.971	933.682	2.25543	1.1537	5.85903e-14	4.50743e-12	up
PEAR1	256.958	1430.1	5.56549	2.30844	7.16265e-14	5.47276e-12	up
IPO11	85.6679	272.615	3.18224	1.61419	7.19835e-14	5.48756e-12	up
CNST	634.025	1683.87	2.65584	1.37648	7.29697e-14	5.55015e-12	up
BEX3	384.344	1644.72	4.27928	1.99355	7.54776e-14	5.72795e-12	up
METTL7B	2.00294	49.3421	24.6348	3.64113	8.11284e-14	6.10169e-12	up
DCLRE1A	119.128	468.901	3.93613	1.88772	9.01736e-14	6.76684e-12	up
KIF23	34.7326	113.268	3.26114	1.65131	9.31128e-14	6.97184e-12	up
ITFG1	323.015	672.436	2.08175	1.04282	9.47995e-14	7.0698e-12	up
HEMGN	85.2298	606.835	7.11998	2.58205	9.74527e-14	7.24837e-12	up
ANK1	164.173	730.081	4.44701	2.03939	9.80042e-14	7.25727e-12	up
UCHL1	4.02079	49.3505	12.2739	3.1262	9.78876e-14	7.25727e-12	up
IGHV1-18	54.5965	452.356	8.28544	2.74216	1.02974e-13	7.59187e-12	up
IGHV1-58	4.46626	46.4725	10.4052	2.96405	1.0432e-13	7.67423e-12	up
IFI27L1	65.1207	169.657	2.60527	1.35293	1.07961e-13	7.92478e-12	up
ITGB3	392.901	2406.41	6.12472	2.4146	1.23395e-13	8.95987e-12	up
TDRP	49.2084	215.004	4.36926	2.01496	1.25108e-13	9.06467e-12	up
TPX2	56.1759	230.94	4.11101	1.94572	1.25463e-13	9.07084e-12	up
BEST3	1.36664	16.6039	12.1494	3.08351	1.27595e-13	9.2052e-12	up
RNASE2	218.66	972.149	4.44594	2.03854	1.36418e-13	9.82062e-12	up
RDH11	533.392	1308.54	2.45324	1.26826	1.41289e-13	1.01302e-11	up
CCNB2	34.7683	146.163	4.2039	1.97561	1.4132e-13	1.01302e-11	up
RYR2	10.0766	66.5245	6.60186	2.49499	1.42352e-13	1.01824e-11	up
TENT5C	652.413	1751.51	2.68467	1.39097	1.44326e-13	1.03017e-11	up
IGHV1-3	58.7567	339.66	5.78078	2.34822	1.51206e-13	1.07471e-11	up
ARPC3P1	6.98718	24.3938	3.49122	1.74213	1.53782e-13	1.09072e-11	up
ARHGAP21	478.13	1404.41	2.9373	1.50936	1.74747e-13	1.2342e-11	up
MMRN1	49.0422	301.51	6.14797	2.41503	1.78035e-13	1.25102e-11	up
MSANTD3	141.356	436.942	3.09108	1.57587	1.86094e-13	1.30339e-11	up
MMP1	1.86678	35.1675	18.8386	3.43378	1.90576e-13	1.33201e-11	up
GADD45A	209.193	929.694	4.4442	2.03622	1.93094e-13	1.34681e-11	up
SLA2	891.154	2579.89	2.895	1.49046	1.93982e-13	1.34999e-11	up
IGKV1-12	43.2046	379.824	8.79127	2.79615	1.94353e-13	1.34999e-11	up
IGHV4-61	6.16846	86.1223	13.9617	3.21877	1.99585e-13	1.38348e-11	up
PRTFDC1	19.8003	82.3302	4.15803	1.94673	2.00336e-13	1.38582e-11	up
IGHV4-59	82.5826	583.547	7.06623	2.56848	2.03631e-13	1.40572e-11	up
KIF20A	12.8909	61.1837	4.74628	2.12456	2.06953e-13	1.42573e-11	up
RGS6	77.8848	325.344	4.17724	1.9589	2.0916e-13	1.43798e-11	up
IGHV3-21	87.5277	597.78	6.8296	2.53159	2.09827e-13	1.43963e-11	up
ECT2	55.095	132.431	2.40368	1.24299	2.20342e-13	1.50257e-11	up
C1QA	134.649	765.512	5.68525	2.32661	2.23761e-13	1.5228e-11	up
IGLV3-10	26.5612	268.605	10.1127	2.92892	2.48827e-13	1.68316e-11	up
DEPDC1B	13.6889	56.0116	4.09175	1.94217	2.61764e-13	1.76005e-11	up
PRKG1-AS1	0.672066	15.8261	23.5484	3.5697	2.68628e-13	1.8026e-11	up
SLC6A4	22.12	110.431	4.99237	2.16741	2.80423e-13	1.87799e-11	up
IL12A	25.5393	62.4017	2.44336	1.26776	2.8805e-13	1.92524e-11	up
SKA3	11.3266	53.9653	4.76448	2.12619	3.17111e-13	2.11527e-11	up
SLFN14	19.7526	66.5056	3.36692	1.67768	3.30365e-13	2.19565e-11	up
MIR181A1HG	4.62504	25.5252	5.51891	2.27498	3.30468e-13	2.19565e-11	up
ZWINT	65.5749	245.752	3.74766	1.82631	3.32868e-13	2.20724e-11	up
DEPP1	28.8245	271.433	9.41675	2.85437	3.43537e-13	2.2735e-11	up
GRAP2	2562.36	9118.45	3.55861	1.75756	3.60891e-13	2.38365e-11	up
RAB11A	1374.85	4071.86	2.96168	1.51961	3.91242e-13	2.56898e-11	up
STARD4	310.837	787.073	2.53211	1.31005	4.12199e-13	2.69605e-11	up
DDX60	443.046	1269.58	2.86557	1.47612	4.21953e-13	2.74916e-11	up
FBXO39	2.26989	14.0557	6.19226	2.40328	4.35493e-13	2.83188e-11	up
AIG1	167.784	569.705	3.39547	1.6963	4.63983e-13	3.00552e-11	up
CIP2A	39.4211	108.977	2.76443	1.43089	5.03147e-13	3.2467e-11	up
ADAMTS2	11.2653	603.927	53.6096	3.9497	5.13656e-13	3.30184e-11	up
STON2	74.8706	358.166	4.7838	2.11991	5.29255e-13	3.39561e-11	up
GRB14	19.0022	135.171	7.11344	2.56526	5.35465e-13	3.42892e-11	up
LY6G6E	40.3085	226.972	5.63087	2.30733	5.63523e-13	3.59489e-11	up
C21orf58	131.033	339.786	2.59312	1.34121	5.6857e-13	3.62022e-11	up
KEL	5.00756	44.858	8.95805	2.79955	5.84384e-13	3.70687e-11	up
C2orf48	7.58696	32.5445	4.28954	1.99424	5.94989e-13	3.76703e-11	up
HELLPAR	7.87107	26.6803	3.38967	1.68976	6.00474e-13	3.79461e-11	up
BBOF1	23.6736	88.9298	3.75649	1.81994	6.31493e-13	3.95348e-11	up
RAB27B	207.13	878.748	4.2425	1.97456	6.28821e-13	3.95348e-11	up
TMEM17	5.40943	33.1088	6.12056	2.38884	7.05934e-13	4.37875e-11	up
LHFPL6	4.32194	26.5589	6.14513	2.38881	7.22722e-13	4.47462e-11	up
APOL6	1773.31	3904.62	2.20189	1.12006	7.35391e-13	4.54469e-11	up
NDUFA5	503.695	1048.29	2.08121	1.04132	8.07705e-13	4.95016e-11	up
HIST1H4E	7.80953	53.7943	6.88829	2.53432	8.25607e-13	5.04656e-11	up
FAM72A	14.2607	37.3745	2.62081	1.34622	8.38363e-13	5.11523e-11	up
TPM1	229.734	1035.25	4.50631	2.04621	8.59317e-13	5.22412e-11	up
MFSD2B	58.15	375.267	6.45344	2.45697	8.63847e-13	5.24218e-11	up
CCNE1	55.5356	151.553	2.72894	1.41457	8.70451e-13	5.27274e-11	up
HMGB2	2223.8	4572.7	2.05625	1.02582	8.73306e-13	5.28052e-11	up
ILDR2	6.66486	33.5393	5.03226	2.16906	9.11823e-13	5.48383e-11	up
LAP3	1115.49	2828.47	2.53562	1.31181	9.3335e-13	5.60327e-11	up
PDK1	400.959	997.805	2.48854	1.28604	9.79786e-13	5.86111e-11	up
DEPDC1	5.02143	29.9105	5.95656	2.39217	9.96798e-13	5.95219e-11	up
IGKV1-27	31.8258	287.899	9.04608	2.80386	9.98553e-13	5.95219e-11	up
RGS13	4.64772	33.9804	7.31121	2.59327	1.17151e-12	6.92182e-11	up
FABP5	100.519	255.275	2.53957	1.31648	1.21886e-12	7.17634e-11	up
LIMS1	1585.56	4487.47	2.83021	1.45779	1.22144e-12	7.17895e-11	up
HIST1H3C	1.25078	13.6676	10.9273	2.97349	1.2417e-12	7.25994e-11	up
IGLV1-47	111.707	841.872	7.53646	2.61907	1.30514e-12	7.59126e-11	up
CDCA5	59.1432	237.574	4.01692	1.90935	1.31186e-12	7.61719e-11	up
CMAHP	266.983	640.518	2.3991	1.23548	1.41752e-12	8.18826e-11	up
IGKV1D-33	4.62675	61.6756	13.3302	3.14492	1.46209e-12	8.38531e-11	up
YWHAH	1080.15	3137.62	2.9048	1.4917	1.53365e-12	8.72416e-11	up
ASAP2	36.2066	170.795	4.71723	2.09432	1.5336e-12	8.72416e-11	up
SPATS2	151.513	337.914	2.23026	1.13863	1.58475e-12	8.98442e-11	up
PTTG1	77.8064	218.374	2.80664	1.45123	1.71273e-12	9.67737e-11	up
IGHV4-39	80.682	609.942	7.55982	2.61821	1.81449e-12	1.0218e-10	up
TNFSF4	127.849	489.502	3.82874	1.84341	1.89744e-12	1.06494e-10	up
ARMCX3	432.246	903.587	2.09045	1.04652	1.92385e-12	1.07797e-10	up
F13A1	3088.84	11764.5	3.80871	1.83786	1.97602e-12	1.10352e-10	up
STOM	1467.93	3277.98	2.23306	1.13838	1.99094e-12	1.10817e-10	up
MYZAP	32.4653	270.679	8.33748	2.71476	1.9909e-12	1.10817e-10	up
DLGAP5	21.0681	97.4206	4.62409	2.08077	2.01932e-12	1.12211e-10	up
NR4A3	11.1155	75.3012	6.77442	2.50064	2.04413e-12	1.13215e-10	up
TBC1D15	536.975	1309.69	2.43901	1.25808	2.0777e-12	1.14789e-10	up
CA2	443.144	1949.43	4.39909	2.01341	2.19047e-12	1.20724e-10	up
ITGA2B	2524.61	16429.7	6.50784	2.45891	2.29841e-12	1.26053e-10	up
PLEKHS1	1.22588	7.72249	6.29955	2.39187	2.38111e-12	1.30376e-10	up
ADAMTS6	26.3137	69.4077	2.6377	1.35792	2.38621e-12	1.30442e-10	up
IGLV3-27	12.0663	133.168	11.0364	2.97322	2.48232e-12	1.35257e-10	up
ST7	92.4106	229.415	2.48256	1.27797	2.61678e-12	1.41893e-10	up
C1orf198	140.371	600.667	4.27916	1.97872	2.67362e-12	1.44741e-10	up
FAH	150.245	618.457	4.11633	1.93174	2.77699e-12	1.50096e-10	up
C1orf112	69.4695	144.459	2.07947	1.03794	2.92409e-12	1.57793e-10	up
IGKV1D-13	3.27035	40.1757	12.2848	3.05705	2.99379e-12	1.61037e-10	up
FBXO5	98.6599	227.447	2.30537	1.184	3.04048e-12	1.63287e-10	up
IGLV1-36	6.1954	95.764	15.4573	3.23896	3.06865e-12	1.64538e-10	up
IGHV1-46	30.653	209.892	6.84738	2.51056	3.14232e-12	1.68219e-10	up
IGKV3-15	195.279	1432.09	7.33355	2.58113	3.21551e-12	1.71591e-10	up
CDT1	76.2993	302.439	3.96384	1.88788	3.24293e-12	1.7278e-10	up
PLXNB3	23.1856	174.769	7.53782	2.60526	3.36337e-12	1.78349e-10	up
NCAPG2	131.626	296.526	2.25279	1.15156	3.38242e-12	1.79076e-10	up
PARP14	2553.5	5902.02	2.31134	1.18516	3.46902e-12	1.83373e-10	up
MYL9	1031.77	8115.23	7.86535	2.65026	3.6201e-12	1.91059e-10	up
WHAMMP3	230.091	763.773	3.31944	1.66171	3.75621e-12	1.97621e-10	up
TRIM13	270.848	676.91	2.49923	1.2899	3.95843e-12	2.06965e-10	up
HIST1H1E	6.86971	67.7386	9.86047	2.86742	4.01297e-12	2.09491e-10	up
RGL1	44.4519	178.858	4.02364	1.90047	4.2323e-12	2.20256e-10	up
ZNF185	964.056	3436.13	3.56424	1.7522	4.36388e-12	2.26403e-10	up
APOBEC3H	73.0948	179.587	2.4569	1.27056	4.40364e-12	2.28114e-10	up
GFI1B	497.192	2331.68	4.68969	2.08584	4.48526e-12	2.31273e-10	up
IGKV3D-15	4.24427	37.8349	8.91436	2.77798	4.80058e-12	2.46398e-10	up
NOSTRIN	0.924388	7.96936	8.62123	2.72437	4.8082e-12	2.46413e-10	up
NEXN-AS1	7.38661	46.8173	6.33813	2.41608	5.3272e-12	2.71768e-10	up
GBP1P1	13.2766	100.726	7.58672	2.60775	6.04599e-12	3.07504e-10	up
MOB1B	555.811	1125.45	2.02489	1.00222	6.26496e-12	3.16724e-10	up
MYLK	367.033	1587.95	4.32646	1.98843	6.3033e-12	3.18184e-10	up
GCKR	0.500496	19.5252	39.0118	3.68982	6.31831e-12	3.18464e-10	up
DMTN	936.334	4479.98	4.7846	2.10717	6.49261e-12	3.26759e-10	up
MAD2L1	73.1398	180.681	2.47035	1.27777	6.58387e-12	3.30857e-10	up
LSM1	207.69	421.446	2.02921	1.00431	7.04149e-12	3.50708e-10	up
HIST1H3J	3.48178	25.2168	7.24249	2.54885	7.03654e-12	3.50708e-10	up
ATL1	30.3191	114.575	3.77898	1.81711	7.05906e-12	3.51063e-10	up
STXBP5-AS1	39.3574	113.544	2.88494	1.47507	7.10755e-12	3.52354e-10	up
INKA2-AS1	6.69416	33.7153	5.03653	2.16625	7.11646e-12	3.52354e-10	up
TBPL1	276.717	897.21	3.24234	1.63081	7.18616e-12	3.55282e-10	up
AQP10	74.0673	520.64	7.02929	2.52828	7.28127e-12	3.59455e-10	up
NDUFV2	62.2255	252.464	4.05725	1.90871	7.91447e-12	3.8957e-10	up
ZNF385D	24.2112	131.099	5.41482	2.24416	8.00156e-12	3.93281e-10	up
PDGFA	19.9491	91.3307	4.57818	2.05259	8.06959e-12	3.96046e-10	up
CLU	2961.55	14562.7	4.91727	2.13702	8.83765e-12	4.32479e-10	up
TMOD1	13.2733	66.5443	5.01342	2.15458	9.09157e-12	4.44258e-10	up
BLZF1	176.906	509.451	2.87978	1.47634	9.14364e-12	4.46154e-10	up
ENKUR	196.448	856.801	4.36147	1.99586	9.22459e-12	4.49451e-10	up
LHFPL2	186.811	492.486	2.63628	1.35978	9.72169e-12	4.70264e-10	up
TSPAN9	208.809	1132.62	5.42417	2.24717	9.94276e-12	4.80267e-10	up
GINS2	29.0167	113.443	3.90958	1.87118	1.00777e-11	4.86088e-10	up
TREML1	737.425	3528	4.78422	2.10427	1.03953e-11	4.99972e-10	up
IGLV1-51	160.272	987.916	6.16397	2.38716	1.05608e-11	5.06481e-10	up
LXN	48.292	181.26	3.75342	1.8135	1.16551e-11	5.53436e-10	up
NT5M	246.827	1169.06	4.73636	2.0918	1.17034e-11	5.54944e-10	up
PHLDA3	11.7648	48.2143	4.09819	1.92502	1.19033e-11	5.62835e-10	up
MPIG6B	1082.98	5328.33	4.92007	2.13567	1.19851e-11	5.65113e-10	up
TM4SF1	2.04727	15.5526	7.59674	2.59871	1.21508e-11	5.72127e-10	up
MIR4435-2HG	256.401	554.521	2.16271	1.09241	1.27359e-11	5.98002e-10	up
MT-ATP8	1832.49	9797.49	5.34656	2.22931	1.30261e-11	6.10773e-10	up
MTURN	1421.64	4889.59	3.43941	1.70392	1.33109e-11	6.2239e-10	up
IGLV1-40	210.283	1600.38	7.61062	2.60178	1.3331e-11	6.22463e-10	up
SLCO2B1	1.35525	15.7615	11.63	2.96044	1.3779e-11	6.41602e-10	up
RNA5-8SN2	1.52234	13.0064	8.54368	2.74059	1.41676e-11	6.58782e-10	up
PKMYT1	61.9084	234.81	3.79286	1.82829	1.49063e-11	6.91221e-10	up
SNCA	213.772	1005.21	4.70228	2.08153	1.49871e-11	6.93053e-10	up
CETN4P	2.58125	24.1077	9.33956	2.78475	1.50276e-11	6.93975e-10	up
MITF	62.0442	181.253	2.92136	1.49064	1.54204e-11	7.10162e-10	up
MT1M	0.173198	12.4413	71.8329	3.78528	1.56591e-11	7.20168e-10	up
RGS1	196.735	1019.92	5.18424	2.19298	1.6211e-11	7.41494e-10	up
THUMPD2	157.331	320.267	2.03563	1.00842	1.66225e-11	7.59282e-10	up
EPHB2	77.7193	276.724	3.56056	1.74626	1.83263e-11	8.29221e-10	up
TPM4	3303.11	8766.75	2.65409	1.36841	1.87673e-11	8.48036e-10	up
RFC3	64.6985	131.919	2.03899	1.01339	1.95464e-11	8.82053e-10	up
RBX1	873.197	2479.11	2.83912	1.45694	1.98258e-11	8.93465e-10	up
OTOGL	0.216762	7.392	34.1018	3.52675	1.99731e-11	8.98895e-10	up
THBS1	607.333	3504.27	5.76994	2.30978	2.00813e-11	9.02556e-10	up
CD70	23.5556	79.4519	3.37296	1.68247	2.07653e-11	9.30813e-10	up
KIF2A	767.562	1780.79	2.32006	1.18784	2.08462e-11	9.33194e-10	up
HIST1H2BG	81.0093	337.375	4.16464	1.93622	2.11672e-11	9.46068e-10	up
HBD	13.376	214.529	16.0384	3.21321	2.15887e-11	9.62587e-10	up
HIST1H2AJ	0.721168	7.33734	10.1742	2.8627	2.16709e-11	9.6497e-10	up
SMIM6	3.62732	22.5995	6.23034	2.39353	2.18928e-11	9.72277e-10	up
PROSER2	59.7708	245.818	4.11268	1.91942	2.21777e-11	9.83629e-10	up
HNRNPLL	394.021	898.945	2.28146	1.16489	2.29395e-11	1.01608e-09	up
APOE	14.5484	78.3075	5.38254	2.23252	2.41977e-11	1.06759e-09	up
GALNT5	0.909574	9.3733	10.3052	2.81791	2.58911e-11	1.13485e-09	up
CCNG1	616.131	1257.87	2.04156	1.01298	2.66713e-11	1.16753e-09	up
CD226	936.068	2229.63	2.38191	1.22323	2.68453e-11	1.17362e-09	up
HMGB3	60.3795	150.783	2.49725	1.29131	2.74503e-11	1.19851e-09	up
RAPGEF5	6.90196	30.4926	4.41797	1.99795	2.78822e-11	1.21108e-09	up
IGHV3-66	6.74433	45.5026	6.74679	2.47276	2.83412e-11	1.22784e-09	up
MGLL	383.807	1729.53	4.50624	2.02812	2.9467e-11	1.27333e-09	up
BCL2L14	3.87174	23.1483	5.97878	2.34494	2.99123e-11	1.29092e-09	up
ANO6	1106.43	3003.68	2.71476	1.39718	3.00506e-11	1.29522e-09	up
PDE3A	11.0851	59.2336	5.34351	2.21405	3.02187e-11	1.3008e-09	up
NEIL3	4.73191	19.828	4.19028	1.95875	3.07035e-11	1.31998e-09	up
HIST1H2BF	13.8409	72.3091	5.22431	2.19336	3.13298e-11	1.34005e-09	up
YOD1	339.305	867.948	2.55802	1.31824	3.19542e-11	1.36329e-09	up
LRRC8B	167.484	421.038	2.51389	1.29416	3.35157e-11	1.42628e-09	up
IGKV1D-8	4.1792	53.3609	12.7682	3.03581	3.38317e-11	1.43791e-09	up
IGKV1D-39	22.888	206.95	9.04188	2.75221	3.422e-11	1.4511e-09	up
CAVIN2	2866.62	10214.6	3.56329	1.74484	3.4546e-11	1.46272e-09	up
HRAT92	162.912	662.604	4.06725	1.90567	3.70518e-11	1.56488e-09	up
ADIPOR1	1658.78	3803.88	2.29318	1.17178	3.88967e-11	1.63868e-09	up
KLHL5	282.543	612.964	2.16945	1.09572	3.91391e-11	1.64292e-09	up
PPARG	6.61094	42.8167	6.47664	2.4188	3.95171e-11	1.65445e-09	up
TFRC	732.645	1495.78	2.04161	1.01319	4.06755e-11	1.70083e-09	up
GNG11	1072.73	4487.19	4.18295	1.93861	4.24831e-11	1.77201e-09	up
ENDOD1	388.386	1088.8	2.8034	1.43816	4.29986e-11	1.79129e-09	up
EMP1	61.1846	297.269	4.85855	2.11165	4.43972e-11	1.84498e-09	up
ISCA1	437.753	892.133	2.03798	1.00969	4.47018e-11	1.85535e-09	up
XXYLT1-AS2	5.53313	31.27	5.65142	2.27316	4.5174e-11	1.87263e-09	up
IQGAP3	9.36326	36.4882	3.89696	1.84923	4.71769e-11	1.95085e-09	up
LTBP1	153.307	749.915	4.8916	2.11906	4.76881e-11	1.96956e-09	up
SCD	109.468	234.123	2.13873	1.0775	4.85214e-11	1.99791e-09	up
TUBB1	2162.77	9230.56	4.26794	1.96165	4.88762e-11	2.00877e-09	up
TROAP	28.8957	111.339	3.85314	1.84543	5.10688e-11	2.09248e-09	up
CA1	6.13329	106.843	17.4201	3.23831	5.30433e-11	2.16678e-09	up
HELLS	120.739	272.703	2.25861	1.15152	5.32467e-11	2.17245e-09	up
IGHV2-5	42.7521	256.37	5.99666	2.34241	5.40635e-11	2.19778e-09	up
TGFB1I1	51.244	263.693	5.14582	2.17437	5.50777e-11	2.2363e-09	up
CENPA	10.6526	47.0057	4.41262	2.01421	5.73739e-11	2.31833e-09	up
GAS2L1	926.606	4596.28	4.96034	2.13352	6.14042e-11	2.46637e-09	up
MPP1	1434.25	3925.15	2.73673	1.40656	6.17005e-11	2.47531e-09	up
TIMP1	1565.52	4302.5	2.74829	1.41211	6.22741e-11	2.49534e-09	up
TUBA8	13.6782	50.3118	3.67825	1.77307	6.33654e-11	2.53605e-09	up
RADIL	5.54093	25.4808	4.59866	2.04136	6.81776e-11	2.71571e-09	up
STAT1	2796.12	6566.33	2.34837	1.2034	6.90651e-11	2.74456e-09	up
PRDX6	1496.2	3268.51	2.18454	1.10529	7.1307e-11	2.82032e-09	up
TMEM158	102.523	540.251	5.26954	2.19929	7.29841e-11	2.8765e-09	up
KIFC1	60.2918	205.939	3.41571	1.69391	7.31172e-11	2.87832e-09	up
COL1A1	2.25571	17.341	7.68759	2.5785	7.32015e-11	2.87832e-09	up
ADAMTS14	9.93979	47.6072	4.78956	2.09011	7.65137e-11	2.99804e-09	up
IGKV2D-40	2.95773	48.3821	16.3578	3.18621	8.07751e-11	3.14667e-09	up
IGHG1	6902.2	52519.1	7.60904	2.57706	8.08734e-11	3.14685e-09	up
CETP	45.6631	139.345	3.05158	1.543	8.10963e-11	3.15188e-09	up
MCM2	118.535	339.285	2.86232	1.46515	8.1531e-11	3.16442e-09	up
IGHV3-30	39.4275	311.589	7.90283	2.6119	8.75532e-11	3.37939e-09	up
IQUB	2.23586	12.7222	5.69005	2.24995	8.9941e-11	3.45569e-09	up
MAP1A	163.448	749.6	4.58617	2.04116	9.16097e-11	3.51099e-09	up
DCTN6	123.878	307.928	2.48574	1.27752	9.47984e-11	3.62162e-09	up
NCK1-DT	37.5031	104.582	2.78863	1.42495	9.54668e-11	3.64284e-09	up
KIF2C	41.8918	134.196	3.20339	1.61324	9.55704e-11	3.64284e-09	up
ITGA9-AS1	21.3681	78.8164	3.68851	1.77863	9.57308e-11	3.64465e-09	up
SVIP	464.353	1207.55	2.6005	1.33812	9.67121e-11	3.66971e-09	up
RAB4A	444.972	1123.67	2.52526	1.2994	9.73094e-11	3.68821e-09	up
KBTBD12	1.86732	18.6534	9.98937	2.80578	1.0106e-10	3.82176e-09	up
TICRR	12.9031	48.5833	3.76526	1.82128	1.01323e-10	3.82739e-09	up
TCN2	161.369	656.758	4.06991	1.90119	1.05781e-10	3.97347e-09	up
GRHL1	35.2517	141.396	4.01105	1.87951	1.06292e-10	3.98821e-09	up
CPA6	0.321851	4.44634	13.8149	2.99651	1.07706e-10	4.03227e-09	up
LEPR	88.4131	248.896	2.81515	1.43923	1.10099e-10	4.10813e-09	up
SDC4	46.1144	150.594	3.26567	1.62892	1.10787e-10	4.12463e-09	up
SPHK1	255.534	685.513	2.68266	1.379	1.1111e-10	4.13208e-09	up
SPSB1	68.647	157.511	2.29451	1.16904	1.13436e-10	4.21392e-09	up
ITGB5	470.325	2143.45	4.55738	2.03265	1.15009e-10	4.26763e-09	up
H2AFJ	614.783	1486.53	2.41798	1.24184	1.15963e-10	4.29831e-09	up
SPC24	19.704	74.7878	3.79556	1.82583	1.19883e-10	4.43383e-09	up
ITGA7	39.0989	153.863	3.93524	1.86025	1.23466e-10	4.5563e-09	up
IGHV2-70	11.2847	108.511	9.61581	2.78096	1.23983e-10	4.57039e-09	up
ARMC3	13.6299	64.5336	4.73469	2.07097	1.24821e-10	4.59622e-09	up
IGHV3-20	10.4874	84.2897	8.0372	2.62178	1.25081e-10	4.60076e-09	up
HRASLS	21.9856	161.672	7.35353	2.53591	1.27373e-10	4.67996e-09	up
HPDL	12.1619	37.756	3.10444	1.5788	1.41998e-10	5.17208e-09	up
TMC1	0.96731	8.40602	8.6901	2.67249	1.4353e-10	5.22223e-09	up
IFIH1	491.773	1029.63	2.09371	1.04729	1.45633e-10	5.28729e-09	up
IL6	7.6142	50.3042	6.60662	2.43104	1.46189e-10	5.30177e-09	up
TMSB15A	1.4249	12.319	8.64549	2.6633	1.4817e-10	5.36203e-09	up
HTR2A	2.25941	18.1959	8.05341	2.60526	1.48456e-10	5.36659e-09	up
TRBV7-5	4.90811	31.1298	6.34252	2.37502	1.52524e-10	5.50773e-09	up
SLC1A3	14.0044	60.6802	4.33295	1.96618	1.55634e-10	5.60801e-09	up
OST4	2621.28	7817.5	2.98232	1.51563	1.57312e-10	5.66237e-09	up
CCT6P1	179.001	373.401	2.08603	1.03992	1.58659e-10	5.70478e-09	up
LYPLAL1	220.09	574.439	2.61001	1.34195	1.61378e-10	5.79635e-09	up
RAP1B	3389.63	7366.2	2.17316	1.09746	1.66529e-10	5.95589e-09	up
KCTD14	0.59607	14.7634	24.7679	3.36074	1.78957e-10	6.35979e-09	up
CNN1	10.8612	76.4249	7.03651	2.48796	1.80934e-10	6.41648e-09	up
FAM20A	28.2288	180.692	6.40096	2.39461	1.91408e-10	6.7612e-09	up
TMCC2	130.014	491.718	3.78205	1.80955	1.93322e-10	6.81267e-09	up
PLA2G12A	258.26	737.072	2.85399	1.4573	2.04216e-10	7.17402e-09	up
PLSCR1	845.594	1932.04	2.28484	1.16501	2.28628e-10	7.98158e-09	up
UBE2C	51.667	201.905	3.90781	1.85227	2.34369e-10	8.15658e-09	up
IGHV4-4	15.6925	101.719	6.48198	2.40495	2.39816e-10	8.29461e-09	up
NCK2	1576.59	4188.25	2.65653	1.36462	2.54403e-10	8.73623e-09	up
SPX	50.4723	253.966	5.03178	2.13598	2.65341e-10	9.09326e-09	up
SLC35D2	159.226	378.665	2.37816	1.21656	2.66177e-10	9.11264e-09	up
VIL1	75.4592	346.108	4.5867	2.03276	2.74965e-10	9.39435e-09	up
SIAE	189.783	486.329	2.56255	1.31561	3.15418e-10	1.06788e-08	up
IGHV3-43	17.2385	113.899	6.60721	2.42045	3.25938e-10	1.10239e-08	up
HASPIN	13.8065	41.0501	2.97325	1.51876	3.33689e-10	1.1252e-08	up
UAP1	223.189	484.379	2.17026	1.09593	3.40117e-10	1.14501e-08	up
ANKRD33B	114.535	300.607	2.62457	1.34602	3.4061e-10	1.1451e-08	up
CREB3L1	0.17706	10.8794	61.4447	3.57144	3.45518e-10	1.15928e-08	up
TRIM40	4.4485	27.5	6.18185	2.34217	3.51505e-10	1.17819e-08	up
OR52N4	8.86537	26.5866	2.99892	1.51151	3.62607e-10	1.21178e-08	up
FBXO43	3.02022	14.5546	4.81905	2.10888	3.67993e-10	1.22856e-08	up
WNT11	11.8095	52.349	4.43279	1.98944	3.6868e-10	1.22963e-08	up
FOXM1	71.8363	187.746	2.61352	1.34593	3.7374e-10	1.24404e-08	up
GPC5	0.910245	9.90085	10.8771	2.83283	3.76043e-10	1.24923e-08	up
TK1	117.456	349.588	2.97633	1.51319	3.78544e-10	1.25506e-08	up
OR2W3	21.8626	86.9122	3.97539	1.86162	3.79269e-10	1.25622e-08	up
SAMD4A	153.343	404.025	2.63477	1.35262	3.89728e-10	1.28959e-08	up
CTSA	3453.49	9620.94	2.78586	1.42557	3.91828e-10	1.29527e-08	up
SLC22A31	12.1182	51.0568	4.21323	1.93718	4.10691e-10	1.35098e-08	up
MYBL2	205.538	911.865	4.43649	1.99359	4.2026e-10	1.37841e-08	up
WFDC1	1.07626	99.1616	92.1357	3.65638	4.34316e-10	1.42192e-08	up
MT-TC	1244.62	3890.34	3.12573	1.57189	4.47425e-10	1.46039e-08	up
PIR	1.28318	8.38232	6.53248	2.45071	4.51276e-10	1.47153e-08	up
MAP1B	7.57794	29.3089	3.86766	1.82605	4.67337e-10	1.52095e-08	up
DUSP4	30.0786	116.352	3.86828	1.83085	4.70653e-10	1.53026e-08	up
DCTN4	417.902	876.155	2.09655	1.04683	4.79233e-10	1.55515e-08	up
IGKV3-11	256.109	1261.87	4.92708	2.10916	5.01911e-10	1.62092e-08	up
PCLAF	17.0135	71.1584	4.18247	1.9304	5.07596e-10	1.6377e-08	up
RTCA-AS1	12.5964	45.3209	3.59791	1.73152	5.20402e-10	1.6758e-08	up
TMEM178B	2.80134	11.3631	4.0563	1.89832	5.32481e-10	1.71306e-08	up
BEND2	129.077	600.561	4.65275	2.04381	5.47075e-10	1.75665e-08	up
PDE4D	421.568	1221.89	2.89845	1.47525	5.5006e-10	1.76287e-08	up
SDC1	16.5518	147.416	8.90634	2.68804	5.56033e-10	1.78031e-08	up
CFAP54	5.36863	26.8447	5.0003	2.13896	5.6606e-10	1.80897e-08	up
AFAP1L2	54.8779	182.738	3.32991	1.64802	5.98815e-10	1.90459e-08	up
MT-TL1	178.422	746.59	4.1844	1.92245	6.03565e-10	1.91608e-08	up
MT-TY	165.006	509.295	3.08652	1.55335	6.13742e-10	1.94288e-08	up
ABCC3	638.169	2312.53	3.6237	1.75264	6.25552e-10	1.97284e-08	up
NDUFAF5	145.878	305.729	2.09578	1.04517	6.39794e-10	2.01397e-08	up
MIR222HG	28.2704	88.7457	3.13918	1.57021	6.57953e-10	2.06726e-08	up
HIST1H1C	348.849	1459.76	4.18451	1.92237	6.93999e-10	2.16836e-08	up
CAMTA1	322.228	781.201	2.42437	1.24178	7.09776e-10	2.2074e-08	up
LMNA	712.567	2357.39	3.3083	1.64067	7.40394e-10	2.28443e-08	up
CTTN	623.983	2481	3.97607	1.8621	7.4237e-10	2.2876e-08	up
ADAM9	267.463	676.467	2.5292	1.29693	7.66172e-10	2.35663e-08	up
IGHV1-69	4.72011	33.3099	7.05701	2.47724	7.68331e-10	2.36111e-08	up
TIMP3	2.13557	16.0611	7.52076	2.51778	7.71267e-10	2.36796e-08	up
WDR62	82.9751	199.412	2.40328	1.2332	8.01263e-10	2.44665e-08	up
ACOT1	4.1075	12.4684	3.03551	1.53478	8.1443e-10	2.48235e-08	up
DHFRP1	27.9587	67.3321	2.40827	1.23553	8.18615e-10	2.49059e-08	up
IGHV2-26	9.4458	78.8661	8.34933	2.62476	8.19438e-10	2.49084e-08	up
LRRC32	14.1668	57.6702	4.07081	1.8839	8.34012e-10	2.53056e-08	up
FTH1P2	54.1338	159.946	2.95464	1.49752	9.363e-10	2.81551e-08	up
DENND4A	495.438	1137.33	2.29561	1.16882	9.75237e-10	2.91955e-08	up
TBXA2R	150.542	601.895	3.99819	1.8665	9.83937e-10	2.93774e-08	up
KIF20B	109.009	229.419	2.10459	1.05168	9.96722e-10	2.97327e-08	up
MAST4-AS1	11.1675	46.8729	4.19727	1.91496	1.0305e-09	3.06586e-08	up
SH3BGRL2	623.734	2348.65	3.76548	1.79584	1.03717e-09	3.08299e-08	up
GUCY1A1	59.6367	197.357	3.30933	1.63648	1.07473e-09	3.19182e-08	up
EIF1B	756.326	1544.55	2.04217	1.01083	1.08691e-09	3.22231e-08	up
UBE2F	296.952	614.356	2.06887	1.02784	1.10432e-09	3.26876e-08	up
RNF208	69.4469	326.163	4.69657	2.04845	1.1291e-09	3.33582e-08	up
EHD3	401.871	1296.36	3.22582	1.6073	1.17425e-09	3.46596e-08	up
CHRNA2	11.3413	84.5884	7.45842	2.51371	1.19739e-09	3.52805e-08	up
MLXIPL	1.51508	13.3842	8.83403	2.64068	1.2123e-09	3.56573e-08	up
FCRL5	394.485	1138.79	2.88677	1.46818	1.25979e-09	3.69895e-08	up
MCOLN2	258.292	530.805	2.05506	1.01932	1.31146e-09	3.83391e-08	up
DOK6	60.0013	154.116	2.56855	1.31146	1.36948e-09	3.99312e-08	up
H1F0	535.133	1458.07	2.72469	1.3932	1.42871e-09	4.155e-08	up
NUTM2A-AS1	211.804	456.367	2.15467	1.08128	1.43856e-09	4.18003e-08	up
GLA	374.41	886.974	2.36899	1.2102	1.4876e-09	4.3082e-08	up
PIF1	71.7718	172.373	2.40168	1.23174	1.48908e-09	4.3082e-08	up
FRMD4B	192.819	515.833	2.67522	1.36876	1.48834e-09	4.3082e-08	up
FAM183BP	7.11921	33.1854	4.66139	2.03391	1.55725e-09	4.50157e-08	up
GNG8	28.4659	134.974	4.74159	2.05707	1.5757e-09	4.55098e-08	up
DNAH8	15.8296	48.6111	3.0709	1.54584	1.60439e-09	4.6259e-08	up
TRBV7-4	15.2953	64.2697	4.20192	1.91256	1.62799e-09	4.6819e-08	up
GPX1P1	207.137	671.585	3.24224	1.61205	1.64536e-09	4.72377e-08	up
ACOT7	154.831	366.82	2.36916	1.21035	1.65164e-09	4.73777e-08	up
TANC1	6.94748	22.2666	3.20499	1.58921	1.65981e-09	4.75713e-08	up
CDCA8	41.3615	120.719	2.91862	1.48645	1.69359e-09	4.84982e-08	up
PRR16	5.12736	23.2114	4.52697	1.9914	1.70969e-09	4.8876e-08	up
IGHV3-13	12.8288	84.3437	6.57456	2.39171	1.71129e-09	4.88802e-08	up
JAK2	915.162	1892.78	2.06824	1.02759	1.71685e-09	4.89972e-08	up
SQLE	119.42	251.936	2.10967	1.05304	1.74193e-09	4.96709e-08	up
CCT6P3	134.317	312.981	2.33016	1.18654	1.86026e-09	5.29104e-08	up
GCOM1	29.5265	187.992	6.36689	2.35772	1.8653e-09	5.30088e-08	up
PROS1	46.7662	227.836	4.87181	2.08226	1.86786e-09	5.30369e-08	up
ALDH1L2	10.8316	36.009	3.32443	1.64801	1.95855e-09	5.54714e-08	up
EGLN3	39.4993	123.973	3.1386	1.56805	1.96435e-09	5.55888e-08	up
PRELID2	7.39956	25.2112	3.40712	1.65574	1.98327e-09	5.603e-08	up
ZNF529-AS1	35.3485	75.8707	2.14636	1.06807	2.02293e-09	5.70546e-08	up
IGLV2-23	136.476	762.817	5.58939	2.22829	2.04908e-09	5.76468e-08	up
CXCL11	2.57117	18.8532	7.33253	2.4816	2.14735e-09	6.0361e-08	up
PCNA	457.702	960.687	2.09894	1.0483	2.30626e-09	6.43436e-08	up
IGKJ1	19.4683	77.1858	3.96468	1.85712	2.34648e-09	6.54114e-08	up
IGKV3-20	449.867	2345.75	5.21433	2.15428	2.3523e-09	6.55194e-08	up
IFIT1B	1.08532	12.4464	11.4679	2.82256	2.41763e-09	6.71167e-08	up
POLE2	22.4423	52.9676	2.36016	1.2129	2.42078e-09	6.71487e-08	up
SDC3	59.211	198.886	3.35893	1.65271	2.43031e-09	6.73574e-08	up
SMC4	351.117	801.329	2.28223	1.15976	2.43697e-09	6.74865e-08	up
STEAP1B	5.02819	18.1064	3.60097	1.73005	2.48417e-09	6.86804e-08	up
DSCC1	11.6386	38.263	3.28759	1.64056	2.54514e-09	7.01354e-08	up
ARL15	176.169	409.767	2.32598	1.18411	2.60174e-09	7.15191e-08	up
INHBA-AS1	1.25314	10.9549	8.74193	2.6232	2.62642e-09	7.21387e-08	up
OPRD1	7.67652	24.7649	3.22606	1.59569	2.71779e-09	7.45264e-08	up
LGALS12	184.605	635.237	3.44106	1.68216	2.75372e-09	7.54502e-08	up
GPR1	2.15036	16.3997	7.62648	2.50151	2.92426e-09	7.96683e-08	up
RHAG	0.263552	13.2931	50.4383	3.40406	2.98363e-09	8.122e-08	up
RNU7-40P	5.27684	13.4194	2.54308	1.2944	3.03961e-09	8.26769e-08	up
HIF1A	1217.24	3266.37	2.68343	1.37167	3.09115e-09	8.40107e-08	up
STAC	1.70031	17.5731	10.3352	2.75325	3.13781e-09	8.52101e-08	up
MRAP2	0.41625	7.53402	18.0998	3.07206	3.16131e-09	8.57788e-08	up
TSPAN33	792.332	2519.74	3.18015	1.58563	3.20373e-09	8.65806e-08	up
CDH6	0.190064	4.85062	25.5209	3.16454	3.31116e-09	8.90542e-08	up
CD276	0.792288	6.82222	8.61078	2.58679	3.37207e-09	9.06199e-08	up
RAB6B	101.018	426.023	4.2173	1.91794	3.45043e-09	9.25041e-08	up
PIP4P2	366.684	1180.88	3.22044	1.60073	3.47256e-09	9.30232e-08	up
DENND5B	109.905	291.939	2.65629	1.35906	3.61636e-09	9.64909e-08	up
PNMA1	681.898	1755.7	2.57472	1.31756	3.62659e-09	9.6687e-08	up
GSTO1	889.242	2035.62	2.28916	1.16316	3.71004e-09	9.8599e-08	up
SIAH2	757.672	1718.45	2.26806	1.15077	3.72996e-09	9.90501e-08	up
CDKN2A	62.296	137.742	2.21109	1.12155	3.79063e-09	1.00582e-07	up
SPSB4	0.983833	15.8819	16.1429	3.02168	3.88128e-09	1.02502e-07	up
CTSL	204.044	549.732	2.69418	1.37566	3.89661e-09	1.02826e-07	up
IGHV3-53	16.4344	90.5349	5.50887	2.20529	3.93122e-09	1.03576e-07	up
HIST1H2BM	0.0858477	5.04113	58.7219	3.28491	3.98327e-09	1.04866e-07	up
SHE	4.55144	29.1572	6.40614	2.34921	4.01536e-09	1.05628e-07	up
TSHR	12.9232	44.8453	3.47014	1.70197	4.02571e-09	1.05817e-07	up
C2	49.1989	156.735	3.18574	1.58638	4.15903e-09	1.08474e-07	up
HIST1H4J	5.85708	28.9835	4.94846	2.09913	4.2609e-09	1.10787e-07	up
AQP1	5.28605	31.7022	5.99734	2.27731	4.29519e-09	1.11592e-07	up
ZBTB43	425.509	1120.31	2.63287	1.34588	4.43745e-09	1.15021e-07	up
CD69	1085.49	2953.77	2.72115	1.38857	4.44353e-09	1.1509e-07	up
RD3L	1.24586	11.5073	9.23638	2.65992	4.53134e-09	1.17094e-07	up
CDKL1	34.8227	89.3767	2.56662	1.30599	4.53844e-09	1.17187e-07	up
HIST1H2BC	103.354	433.986	4.19904	1.91188	4.56781e-09	1.17855e-07	up
SMILR	2.7348	18.6514	6.82003	2.40905	4.63638e-09	1.19258e-07	up
METTL21EP	10.0175	55.4696	5.53725	2.20008	4.78448e-09	1.22786e-07	up
SPC25	8.07254	38.5028	4.7696	2.06619	4.82079e-09	1.23623e-07	up
ALOX12	332.405	1123.33	3.37939	1.65721	5.02322e-09	1.28325e-07	up
GNAS	10974.5	23153.3	2.10974	1.05344	5.14934e-09	1.31447e-07	up
CD27-AS1	253.387	519.768	2.05128	1.01389	5.21599e-09	1.32823e-07	up
GGH	33.868	99.174	2.92825	1.48709	5.21903e-09	1.32823e-07	up
C9orf3	64.9065	143.515	2.21111	1.11004	5.28366e-09	1.34264e-07	up
GINS1	25.7635	75.695	2.93807	1.49227	5.28302e-09	1.34264e-07	up
CCL2	23.1271	160.477	6.93892	2.42113	5.35433e-09	1.35855e-07	up
MYEOV	44.1778	185.685	4.20312	1.90919	5.36322e-09	1.35978e-07	up
MSRB3	70.5899	236.141	3.34525	1.64235	5.40358e-09	1.36794e-07	up
RNF11	1258.48	3272.37	2.60024	1.32936	5.44822e-09	1.37811e-07	up
IGLV4-69	57.3056	338.141	5.90066	2.26954	5.45195e-09	1.37811e-07	up
PSD3	25.1918	65.3856	2.59551	1.31815	5.50712e-09	1.39101e-07	up
LYPLAL1-DT	12.3442	48.9066	3.96191	1.83434	5.59452e-09	1.40886e-07	up
IGF2BP2	137.653	384.431	2.79276	1.41909	5.68429e-09	1.42612e-07	up
NES	0.823823	7.03501	8.53947	2.58635	5.69333e-09	1.42732e-07	up
PBX1	80.3843	241.545	3.00488	1.51086	6.0169e-09	1.50061e-07	up
PTPRF	24.6879	99.3769	4.02533	1.85643	6.05942e-09	1.50898e-07	up
RASGRP3	192.761	421.79	2.18815	1.10256	6.30284e-09	1.56496e-07	up
MS4A4A	71.8356	237.295	3.30331	1.6283	6.51212e-09	1.60979e-07	up
CENPI	6.87443	20.55	2.98934	1.52472	6.5221e-09	1.61107e-07	up
ANKRD9	215.595	764.186	3.54455	1.71286	6.69783e-09	1.64842e-07	up
PDGFC	70.2382	199.738	2.84372	1.4407	6.73714e-09	1.65688e-07	up
TEX9	17.7902	55.4779	3.11846	1.55091	6.81493e-09	1.67479e-07	up
IGHV3-15	85.3234	572.571	6.7106	2.38688	6.95174e-09	1.70095e-07	up
TGFB2	2.03429	9.97764	4.90473	2.04726	7.05186e-09	1.72294e-07	up
ALAS2	40.7035	500.627	12.2994	2.85608	7.10677e-09	1.73383e-07	up
E2F6P4	1.39804	8.62263	6.16767	2.26861	7.71539e-09	1.87281e-07	up
TCHH	0.700823	9.94787	14.1946	2.92202	7.77487e-09	1.88588e-07	up
CDCA3	34.4721	87.8038	2.54709	1.30893	8.12854e-09	1.96176e-07	up
CENPM	36.5391	118.353	3.23908	1.61033	8.1702e-09	1.96899e-07	up
HIST1H1B	1.49268	8.24693	5.52493	2.19785	8.25044e-09	1.9869e-07	up
SAMD14	75.129	443.374	5.90151	2.261	8.66995e-09	2.07456e-07	up
ATP9A	138.043	389.169	2.81919	1.42998	8.71413e-09	2.08364e-07	up
MTFR2	20.4961	46.2883	2.2584	1.15294	8.76728e-09	2.09486e-07	up
INAFM2	667.184	1635.89	2.45194	1.25167	8.88296e-09	2.11949e-07	up
CFB	3.71929	12.6327	3.39654	1.64015	8.90756e-09	2.12385e-07	up
MYRF	72.2966	170.16	2.35363	1.19819	9.17181e-09	2.18376e-07	up
AMHR2	1.11487	10.398	9.32667	2.65021	9.27112e-09	2.20273e-07	up
IGKV2-40	0.36933	10.4762	28.3654	3.19968	9.28434e-09	2.20431e-07	up
TAL1	189.926	654.999	3.44871	1.67796	9.47377e-09	2.2477e-07	up
TRHDE-AS1	1.15485	12.7768	11.0636	2.77002	9.52652e-09	2.25862e-07	up
DENND2C	21.7123	58.0848	2.6752	1.35688	9.63905e-09	2.28369e-07	up
MYO1C	411.615	909.419	2.20939	1.11376	9.97938e-09	2.35602e-07	up
KIAA1958	91.1339	243.897	2.67625	1.36407	1.07094e-08	2.51424e-07	up
MT-ND4L	12847.2	38136.7	2.96849	1.49529	1.07183e-08	2.51458e-07	up
IGLV3-16	3.81414	20.4505	5.36175	2.17054	1.08233e-08	2.53744e-07	up
LURAP1L	3.79956	19.3726	5.09865	2.10579	1.08501e-08	2.54195e-07	up
HPGD	118.319	260.971	2.20566	1.10932	1.12511e-08	2.63039e-07	up
PLS3	6.16599	24.9844	4.05196	1.86352	1.13034e-08	2.6408e-07	up
SEC14L2	49.288	210.981	4.28057	1.92461	1.18945e-08	2.77117e-07	up
NMNAT3	39.7051	128.567	3.23805	1.59915	1.20554e-08	2.80479e-07	up
PRKAR1B	451.275	1249.54	2.76891	1.40711	1.2383e-08	2.86711e-07	up
BCL2L1	781.323	1867.83	2.39061	1.21793	1.24383e-08	2.87793e-07	up
EXOC3L2	12.0087	54.9446	4.5754	1.98977	1.25795e-08	2.9066e-07	up
XAF1	544.084	1696.6	3.11827	1.55515	1.2745e-08	2.94281e-07	up
RAB3IL1	2.58264	11.2223	4.3453	1.92733	1.27987e-08	2.95318e-07	up
AGFG1	1034.28	2393.03	2.31371	1.17493	1.29258e-08	2.98047e-07	up
BIRC5	52.5137	207.053	3.94285	1.83521	1.30543e-08	3.00803e-07	up
TMEM140	795.867	2582.04	3.24431	1.6032	1.33639e-08	3.07098e-07	up
PF4V1	151.98	721.233	4.74559	2.03446	1.34893e-08	3.09553e-07	up
HBM	7.16812	98.4146	13.7295	2.89527	1.37432e-08	3.14951e-07	up
TMEM70	219.185	680.398	3.10422	1.54892	1.39081e-08	3.18079e-07	up
GJA4	2.07315	17.373	8.38003	2.54883	1.40127e-08	3.20253e-07	up
DNAH2	5.67556	26.7838	4.71914	2.0178	1.40427e-08	3.2072e-07	up
IGHG3	1421.08	6735.26	4.73954	2.03292	1.41299e-08	3.22275e-07	up
PTPRN	17.2376	79.5975	4.61767	2.00292	1.42444e-08	3.24626e-07	up
PER1	1956.37	5846.55	2.98847	1.50231	1.43214e-08	3.25666e-07	up
IGHV3-23	208.269	971.047	4.66247	2.01563	1.43367e-08	3.25666e-07	up
HBB	3299.3	38786.2	11.7559	2.80185	1.45801e-08	3.30972e-07	up
VN1R110P	1.56547	12.8144	8.18561	2.52063	1.55613e-08	3.51347e-07	up
HIST1H4PS1	1.59408	9.97185	6.25556	2.28785	1.56233e-08	3.52274e-07	up
ANO7L1	13.2399	33.5695	2.53548	1.29653	1.60883e-08	3.62272e-07	up
GLYATL1P1	7.00883	27.7523	3.95962	1.82471	1.61517e-08	3.63456e-07	up
NKAIN2	1.86815	12.1242	6.48996	2.31509	1.61741e-08	3.63718e-07	up
RAB32	843.648	2166.14	2.56759	1.3101	1.62354e-08	3.64608e-07	up
IGKV1-16	54.8642	291.624	5.31538	2.15028	1.6273e-08	3.65209e-07	up
CPEB4	673.531	1389.27	2.06267	1.02115	1.63698e-08	3.6689e-07	up
CKS2	59.6136	134.328	2.25331	1.14583	1.64823e-08	3.69167e-07	up
IGKJ4	25.5208	81.427	3.19061	1.58534	1.66821e-08	3.73392e-07	up
STX1A	135.204	379.538	2.80715	1.42237	1.68353e-08	3.76321e-07	up
MX1	2293.28	6827.23	2.97705	1.49697	1.69117e-08	3.77777e-07	up
IGKV1D-16	4.53763	27.9848	6.16726	2.30002	1.70208e-08	3.79207e-07	up
CREG1	903.269	1894.89	2.09782	1.04386	1.81198e-08	4.01297e-07	up
VSIG4	54.5504	388.427	7.12051	2.41988	1.82227e-08	4.0331e-07	up
SENCR	84.5332	252.945	2.99226	1.50128	1.90795e-08	4.20612e-07	up
IGHV5-51	108.005	473.162	4.38093	1.94581	1.94034e-08	4.26913e-07	up
CDC14B	236.71	719.905	3.0413	1.52166	1.96418e-08	4.31876e-07	up
VIP	0.470536	7.66701	16.2942	2.9459	1.96683e-08	4.32175e-07	up
LSMEM1	67.4169	213.788	3.17114	1.57322	1.97564e-08	4.33828e-07	up
KCNRG	5.04309	14.5611	2.88734	1.4455	2.01833e-08	4.4176e-07	up
CLK3P2	1.74843	9.86519	5.64232	2.18232	2.04683e-08	4.47414e-07	up
OR2L13	1.09681	7.82704	7.13619	2.39675	2.06737e-08	4.51318e-07	up
SLC2A5	82.0875	207.044	2.52224	1.28865	2.08704e-08	4.54725e-07	up
DDX47	90.8954	214.495	2.3598	1.19742	2.09916e-08	4.56775e-07	up
MND1	7.02263	25.1903	3.58702	1.73411	2.10606e-08	4.57388e-07	up
IFI27L2	482.669	1021.45	2.11626	1.05556	2.13078e-08	4.61563e-07	up
LAYN	9.20448	29.5764	3.21327	1.58418	2.13075e-08	4.61563e-07	up
MT2A	852.899	2609.15	3.05916	1.52938	2.14353e-08	4.64026e-07	up
PARP9	1521.51	3301.5	2.16989	1.08913	2.1576e-08	4.66171e-07	up
SLC4A11	14.917	40.7023	2.72858	1.38598	2.15486e-08	4.66171e-07	up
TRAPPC3L	21.1659	82.2946	3.88807	1.80666	2.21557e-08	4.77776e-07	up
UNQ6494	1.12817	18.9554	16.8019	2.97052	2.30968e-08	4.9616e-07	up
TXNL4B	289.816	673.557	2.32409	1.17914	2.38627e-08	5.11307e-07	up
FIRRE	19.5354	39.8918	2.04203	1.00121	2.41763e-08	5.17367e-07	up
AURKB	68.7378	192.028	2.79363	1.41966	2.44843e-08	5.23293e-07	up
MT-TS2	64.2258	315.145	4.90683	2.06123	2.48316e-08	5.30378e-07	up
IGKV1-6	17.0463	90.3431	5.29986	2.14262	2.55568e-08	5.44484e-07	up
IGKV3D-11	6.09635	31.4313	5.15576	2.1183	2.76775e-08	5.8595e-07	up
PLCH1	5.81185	26.2716	4.52035	1.95972	2.77486e-08	5.87086e-07	up
CH25H	0.207146	5.36119	25.8813	3.09679	2.78531e-08	5.88557e-07	up
UNC13B	27.4484	71.7555	2.6142	1.33215	3.07875e-08	6.465e-07	up
MT1L	3.13376	11.5034	3.67082	1.76501	3.12033e-08	6.53963e-07	up
C1orf116	14.4924	55.3241	3.81747	1.78262	3.33794e-08	6.9528e-07	up
IGKV6-21	11.6063	77.9108	6.71279	2.35615	3.44298e-08	7.16271e-07	up
CTDSPL	253.919	945.858	3.72503	1.75882	3.52515e-08	7.30204e-07	up
ACTR3B	136.013	336.269	2.47233	1.25773	3.52907e-08	7.30565e-07	up
CABLES1	12.9735	35.9413	2.77038	1.40876	3.57261e-08	7.38196e-07	up
UGT2B28	2.15902	15.6666	7.25635	2.41486	3.57471e-08	7.38196e-07	up
HBA1	388.172	4696.29	12.0985	2.78396	3.64295e-08	7.50443e-07	up
SH3D19	8.71308	39.1116	4.48884	1.95937	3.66582e-08	7.5423e-07	up
IGLV4-60	12.0503	69.1465	5.73817	2.21359	3.73585e-08	7.6723e-07	up
MYLK2	0.281491	2.94221	10.4522	2.72139	3.74909e-08	7.69479e-07	up
IGHV3-49	41.1593	186.563	4.53271	1.9747	3.805e-08	7.80001e-07	up
BCAM	0.43668	4.68022	10.7178	2.68785	3.85274e-08	7.89307e-07	up
KRT8	8.96211	28.8289	3.21675	1.57852	3.88321e-08	7.95065e-07	up
LAMP3	34.9165	113.072	3.23836	1.59739	4.00353e-08	8.17707e-07	up
KIF28P	25.9639	99.5761	3.83518	1.78761	4.09749e-08	8.34869e-07	up
MRPL37P1	0.649762	6.18971	9.52613	2.60406	4.43828e-08	8.96697e-07	up
KIF24	9.27446	22.1329	2.38643	1.23289	4.54864e-08	9.16241e-07	up
IGLC7	43.8909	280.182	6.3836	2.30525	4.55923e-08	9.16727e-07	up
SAMSN1	414.487	864.047	2.08462	1.03365	4.59294e-08	9.22401e-07	up
GLDN	1.31253	26.2352	19.9882	2.99799	4.81757e-08	9.64059e-07	up
HIST1H3B	6.17	34.6251	5.61185	2.18662	4.88043e-08	9.75476e-07	up
DYNC1I1	2.81385	12.9888	4.61602	1.97024	4.99041e-08	9.95683e-07	up
FABP5P7	14.1415	33.6585	2.38011	1.22503	5.0123e-08	9.98261e-07	up
UPK1A-AS1	0.847473	12.9867	15.324	2.88246	5.01521e-08	9.98261e-07	up
RBP4	0.239129	5.27752	22.0698	3.00118	5.04867e-08	1.00373e-06	up
IGHV6-1	44.2335	225.203	5.09124	2.09084	5.0965e-08	1.01264e-06	up
SPTB	91.2981	357.449	3.91518	1.81088	5.2369e-08	1.03931e-06	up
MT-TD	45.3226	199.473	4.40118	1.93778	5.33338e-08	1.05539e-06	up
IGLV7-43	48.6138	391.155	8.04616	2.49243	5.53052e-08	1.09178e-06	up
CYB5R1	547.919	1118.8	2.04191	1.00537	5.63077e-08	1.10767e-06	up
NRN1	5.07348	19.5964	3.86252	1.79861	5.78093e-08	1.13197e-06	up
DMC1	3.92309	16.1966	4.12852	1.88454	5.78159e-08	1.13197e-06	up
TRHDE	1.57496	9.75173	6.19173	2.25814	5.7846e-08	1.13197e-06	up
HSPB6	0.892161	7.43127	8.32952	2.51362	5.93183e-08	1.15674e-06	up
PDGFRA	4.60485	18.8388	4.09108	1.84822	5.98924e-08	1.16726e-06	up
TEDC2	13.4335	46.4648	3.45888	1.68278	6.00596e-08	1.16984e-06	up
IGLJ2	23.237	162.204	6.98042	2.37762	6.02361e-08	1.1726e-06	up
TXNDC5	164.298	587.932	3.57844	1.70904	6.18734e-08	1.19961e-06	up
SCG5	3.645	9.90408	2.71716	1.40695	6.49462e-08	1.25701e-06	up
HIST3H2A	94.2808	220.048	2.33396	1.18241	6.56991e-08	1.26887e-06	up
TRPC2	24.0623	92.6559	3.85067	1.78501	6.72388e-08	1.29542e-06	up
ERMN	200.272	473.936	2.36646	1.19991	6.73764e-08	1.29646e-06	up
SMTN	108.245	398.111	3.67788	1.73896	6.74088e-08	1.29646e-06	up
BDNF	1.6633	10.1312	6.091	2.24384	6.7786e-08	1.30223e-06	up
SLC24A3	54.8341	226.521	4.13103	1.86618	6.7905e-08	1.30377e-06	up
RAB13	27.1927	67.9365	2.49833	1.26488	6.92346e-08	1.32778e-06	up
IGKJ5	23.0832	61.1949	2.65106	1.34924	6.92167e-08	1.32778e-06	up
EME1	15.8848	34.4181	2.16673	1.09492	6.9839e-08	1.33708e-06	up
NKAIN1	0.17081	4.59004	26.8723	2.9957	7.02636e-08	1.34281e-06	up
AVPR1A	20.7772	84.6392	4.07367	1.84908	7.04383e-08	1.34473e-06	up
SYNM	94.3299	259.676	2.75285	1.39116	7.08919e-08	1.35185e-06	up
CD80	8.96591	33.0063	3.68132	1.7325	7.1436e-08	1.36146e-06	up
IGLV1-44	292.515	1758.67	6.01225	2.24164	7.15539e-08	1.36293e-06	up
UHRF1	154.626	330.432	2.13697	1.06763	7.22866e-08	1.37533e-06	up
MUC1	32.333	75.6326	2.33918	1.18871	7.27272e-08	1.38136e-06	up
CCNB1	47.6886	132.279	2.77381	1.40755	7.42024e-08	1.407e-06	up
SEC14L5	76.9199	337.02	4.38144	1.92823	7.99654e-08	1.50524e-06	up
HIST1H1PS1	0.922823	6.94294	7.52359	2.40605	8.26039e-08	1.55056e-06	up
RNU6-574P	4.14679	17.8374	4.30149	1.89512	8.41862e-08	1.57499e-06	up
SPAG4	32.7003	104.66	3.20059	1.5775	8.42632e-08	1.57555e-06	up
P2RY6	27.854	86.6879	3.11222	1.54301	8.53542e-08	1.59418e-06	up
FEN1	171.526	350.811	2.04524	1.01009	8.55469e-08	1.59689e-06	up
AUNIP	6.82038	16.6698	2.44412	1.25654	8.56686e-08	1.59827e-06	up
COL24A1	16.6743	42.6152	2.55575	1.29897	8.63497e-08	1.6092e-06	up
NT5C3AP1	6.74224	22.2331	3.29759	1.59904	8.66218e-08	1.61337e-06	up
TGM2	44.9138	132.405	2.94798	1.47592	8.87514e-08	1.64938e-06	up
SPOCD1	150.807	607.808	4.03037	1.83823	8.9006e-08	1.6532e-06	up
OR56B2P	1.4684	6.49952	4.42625	1.91345	8.98622e-08	1.66634e-06	up
LIPM	3.3635	20.8885	6.21034	2.26585	9.3258e-08	1.72333e-06	up
SHROOM4	6.97434	28.8377	4.13482	1.85019	9.34215e-08	1.72473e-06	up
SLC12A8	7.82016	23.6777	3.02777	1.50657	9.37077e-08	1.72907e-06	up
CRAT	464.11	1055.25	2.27371	1.14698	9.37903e-08	1.72964e-06	up
FAM69B	102.148	285.812	2.79802	1.41136	9.55865e-08	1.75987e-06	up
ANKRD22	30.259	157.51	5.2054	2.10107	9.73351e-08	1.78815e-06	up
AIF1L	1.07073	5.61526	5.24432	2.08399	9.82845e-08	1.80362e-06	up
TEX45	1.46368	12.1	8.26685	2.48208	9.89403e-08	1.81268e-06	up
RNF152	3.33549	16.7579	5.02412	2.06164	9.967e-08	1.82406e-06	up
PKIG	208.584	507.824	2.43463	1.23548	1.00743e-07	1.83969e-06	up
PARVB	532.614	1248.15	2.34344	1.18635	1.02217e-07	1.86358e-06	up
FSTL1	63.7101	278.205	4.36673	1.92123	1.03258e-07	1.88052e-06	up
THRB	39.3905	126.719	3.21698	1.57724	1.03522e-07	1.88329e-06	up
ABTB2	68.4197	147.87	2.16123	1.08064	1.04139e-07	1.89143e-06	up
TNNT1	45.4496	203.406	4.47541	1.94772	1.0468e-07	1.89819e-06	up
TP73	15.9706	47.807	2.99343	1.50015	1.05493e-07	1.9119e-06	up
SLC35D3	8.42969	38.745	4.59626	1.97084	1.06546e-07	1.92891e-06	up
IGLV2-14	255.805	1282.37	5.01306	2.06254	1.07179e-07	1.93931e-06	up
MTND2P28	2998.82	8126.27	2.70982	1.37165	1.09648e-07	1.98185e-06	up
CARD19	1272.42	2628.64	2.06585	1.0203	1.11814e-07	2.01667e-06	up
NRGN	14876.9	51540.1	3.46445	1.66661	1.12109e-07	2.01982e-06	up
GABRE	0.548124	5.21592	9.51595	2.55853	1.12638e-07	2.02827e-06	up
REEP1	5.88948	25.1792	4.27529	1.89561	1.13082e-07	2.03408e-06	up
ZSWIM5P2	0.485222	4.85658	10.009	2.56499	1.13189e-07	2.03492e-06	up
FAM57B	1.46951	6.90129	4.69633	1.98247	1.13428e-07	2.03813e-06	up
GABRD	4.14852	24.9886	6.02351	2.22268	1.14756e-07	2.05869e-06	up
MTATP6P1	3102.25	8881.06	2.86278	1.43942	1.15701e-07	2.07343e-06	up
FTH1P23	14.505	44.9574	3.09943	1.53328	1.23303e-07	2.20027e-06	up
AMN1	54.5871	142.681	2.61382	1.32336	1.25861e-07	2.24236e-06	up
STAP1	162.7	341.718	2.10029	1.04306	1.27749e-07	2.27478e-06	up
SGO1	15.6034	35.1996	2.25589	1.14087	1.28057e-07	2.27785e-06	up
MYO7A	100.679	230.539	2.28986	1.15519	1.32248e-07	2.34868e-06	up
OAS3	1895.77	4866.34	2.56695	1.30288	1.33631e-07	2.37198e-06	up
HSPA2	6.32267	21.6933	3.43104	1.64836	1.39633e-07	2.46421e-06	up
SSC4D	10.0281	28.8306	2.87497	1.44696	1.40806e-07	2.47971e-06	up
MOXD1	14.9393	41.3867	2.77033	1.41041	1.41569e-07	2.49054e-06	up
DNM1	74.8397	206.357	2.75732	1.38994	1.42798e-07	2.50952e-06	up
SHROOM3	0.335696	4.34312	12.9377	2.74293	1.44039e-07	2.53002e-06	up
MFAP3L	199.866	639.322	3.19876	1.57105	1.45119e-07	2.54632e-06	up
CALD1	44.2535	182.302	4.11949	1.85377	1.46274e-07	2.56526e-06	up
MAEL	2.16871	11.7083	5.39874	2.10333	1.48183e-07	2.59197e-06	up
SLC7A5	341.688	781.126	2.28608	1.15373	1.49598e-07	2.61536e-06	up
MYO3B	9.17771	31.5844	3.44143	1.63855	1.61843e-07	2.81625e-06	up
IGLJ3	3.41423	21.3378	6.24967	2.26329	1.62467e-07	2.82418e-06	up
IGHV4-28	0.535889	9.2046	17.1763	2.85664	1.69167e-07	2.93006e-06	up
ZBTB32	127.443	304.476	2.38911	1.21188	1.72681e-07	2.97864e-06	up
VCL	2468.86	5766.52	2.3357	1.18086	1.80261e-07	3.09352e-06	up
CABP5	100.979	431.978	4.27791	1.89229	1.85258e-07	3.17118e-06	up
TNS1	124.245	324.891	2.61493	1.3235	1.8565e-07	3.17626e-06	up
RAB33A	48.4804	139.464	2.87672	1.44212	1.89146e-07	3.23114e-06	up
DEFB1	0.599523	10.4217	17.3834	2.86478	1.90358e-07	3.24856e-06	up
PITX1	0.943655	5.16315	5.47144	2.14151	1.92175e-07	3.27623e-06	up
AHSP	3.00397	52.6556	17.5287	2.87124	1.93306e-07	3.29062e-06	up
PTGIR	436.52	1084.68	2.48483	1.25971	1.9722e-07	3.34697e-06	up
CDHR5	23.5868	54.5162	2.3113	1.16546	1.98744e-07	3.36942e-06	up
CR1L	2.1559	13.789	6.39596	2.2583	2.01408e-07	3.41115e-06	up
PSTPIP2	790.01	1694.65	2.1451	1.06906	2.05889e-07	3.47478e-06	up
IL17RD	0.129283	3.5901	27.7692	2.86324	2.26358e-07	3.77476e-06	up
PIGHP1	12.4062	39.0248	3.14559	1.5407	2.3627e-07	3.92449e-06	up
ARHGAP8	1.69952	11.1213	6.5438	2.28038	2.37359e-07	3.93868e-06	up
LGALSL	185.941	675.24	3.63147	1.71249	2.4788e-07	4.08904e-06	up
C22orf24	4.34411	13.0969	3.01486	1.45984	2.48005e-07	4.0891e-06	up
CDKN1A	1582.24	3682.1	2.32714	1.17511	2.54329e-07	4.18565e-06	up
PSAT1	52.7421	117.528	2.22834	1.12197	2.6879e-07	4.39944e-06	up
ZMYND12	6.47849	22.3423	3.44869	1.63512	2.72356e-07	4.45347e-06	up
HBQ1	25.4794	94.5558	3.71107	1.73442	2.7336e-07	4.46771e-06	up
NCBP2L	4.29611	16.4419	3.82717	1.75169	3.03474e-07	4.91068e-06	up
NFIB	1.16391	7.25194	6.23067	2.21702	3.03677e-07	4.91068e-06	up
CXCL10	32.2148	143.877	4.46618	1.93039	3.04384e-07	4.91976e-06	up
TIMD4	11.7805	39.3415	3.33954	1.62158	3.29342e-07	5.28504e-06	up
IGHV1-69D	19.0494	151.261	7.94048	2.42585	3.33682e-07	5.34857e-06	up
ST8SIA5	1.96442	28.2434	14.3774	2.75563	3.4223e-07	5.47356e-06	up
MLH3	605.614	1432.83	2.36592	1.19502	3.44591e-07	5.5087e-06	up
RAB38	15.2809	32.3159	2.11479	1.04742	3.54457e-07	5.64495e-06	up
IGLV5-37	1.9513	18.7478	9.60784	2.55117	3.68626e-07	5.84844e-06	up
RUNDC3A	5.81857	20.5854	3.53788	1.66718	3.68833e-07	5.84896e-06	up
OPHN1	19.7794	46.715	2.3618	1.17877	3.72911e-07	5.90805e-06	up
ID1	70.2532	290.396	4.13356	1.8474	3.79581e-07	5.99677e-06	up
CNKSR3	2.60164	12.9414	4.97434	2.01198	3.81887e-07	6.02753e-06	up
PPP1R12A-AS1	6.55648	17.1587	2.61706	1.31503	3.83956e-07	6.05452e-06	up
AKR7A2P1	1.07265	4.71013	4.3911	1.86256	3.92631e-07	6.16817e-06	up
SMIM10	5.70265	16.9847	2.97838	1.46344	3.94177e-07	6.18955e-06	up
EVC2	16.1697	33.106	2.04741	1.00677	3.94747e-07	6.19272e-06	up
IGHV7-4-1	29.7459	251.915	8.46892	2.46471	3.95654e-07	6.20116e-06	up
SNORD11	2.96716	11.9661	4.03285	1.81196	4.04379e-07	6.32023e-06	up
IGKV3-7	1.22886	7.78546	6.33551	2.24361	4.07439e-07	6.35919e-06	up
PPDPF	1516.54	4271.51	2.81661	1.41267	4.11589e-07	6.418e-06	up
SEMA6B	40.6301	319.516	7.86402	2.41091	4.20888e-07	6.54781e-06	up
LIPH	12.107	40.5604	3.35017	1.60743	4.21106e-07	6.54817e-06	up
RGS16	12.1014	36.6592	3.02934	1.50437	4.29434e-07	6.66228e-06	up
TOM1L1	8.59487	28.0942	3.26872	1.57018	4.30581e-07	6.67699e-06	up
KIFC3	349.209	951.814	2.72563	1.37171	4.3143e-07	6.68399e-06	up
GPX1	9381.25	23157.1	2.46845	1.24871	4.38453e-07	6.77958e-06	up
BVES	0.92717	7.88066	8.49969	2.4722	4.50939e-07	6.94781e-06	up
VCAM1	3.62253	16.4877	4.55143	1.94053	4.52895e-07	6.96836e-06	up
STMN1	440.333	906.761	2.05926	1.01447	4.55737e-07	7.00248e-06	up
PDCD1	122.318	329.998	2.69787	1.36039	4.5813e-07	7.03282e-06	up
BBS12	17.1975	52.2374	3.03751	1.50013	4.58549e-07	7.03603e-06	up
ARL4A	241.413	521.399	2.15978	1.07601	4.80729e-07	7.34953e-06	up
EHD2	11.7773	42.0602	3.5713	1.67616	4.85685e-07	7.42193e-06	up
DDR2	11.9832	32.9477	2.74948	1.38729	4.98186e-07	7.6026e-06	up
APP	1991.83	4272.77	2.14515	1.06706	5.02742e-07	7.65822e-06	up
PXDC1	30.0779	74.6016	2.48027	1.25049	5.03683e-07	7.66907e-06	up
MSR1	83.6284	220.773	2.63993	1.33103	5.04547e-07	7.67876e-06	up
NPW	3.23771	9.41087	2.90665	1.4595	5.10627e-07	7.75866e-06	up
SPINK4	0.81299	7.11507	8.75173	2.44862	5.12721e-07	7.78202e-06	up
OAS2	1972.65	4296.2	2.17788	1.08703	5.328e-07	8.05766e-06	up
PRUNE1	451.46	949.705	2.10363	1.04071	5.36018e-07	8.10269e-06	up
HIST2H4A	2.24605	12.9849	5.78122	2.15315	5.38791e-07	8.1373e-06	up
C3orf70	0.687477	6.91676	10.0611	2.55784	5.5617e-07	8.38094e-06	up
HIST1H2AL	2.15856	7.85321	3.63817	1.72628	5.62644e-07	8.45954e-06	up
MTRNR2L12	4.45842	20.5383	4.60663	1.94389	5.69834e-07	8.55234e-06	up
SLC7A11	10.7099	29.236	2.7298	1.37794	5.73384e-07	8.59028e-06	up
LDLR	368.025	803.486	2.18324	1.08952	5.90758e-07	8.7996e-06	up
ANKRD36BP2	99.0767	264.652	2.67118	1.3472	5.90531e-07	8.7996e-06	up
LIF	5.40882	17.7791	3.28705	1.59364	5.90458e-07	8.7996e-06	up
TJP1	0.147667	2.84551	19.2698	2.69495	6.09727e-07	9.05407e-06	up
MIR4742	0.59432	3.93898	6.62771	2.24244	6.34863e-07	9.4024e-06	up
PABPC1P3	12.9086	42.0832	3.26009	1.5765	6.41763e-07	9.48788e-06	up
EFHC2	62.2493	140.08	2.25031	1.12346	6.57559e-07	9.69583e-06	up
SLC27A2	13.856	41.5221	2.99668	1.49066	6.67946e-07	9.83604e-06	up
TNFAIP3	3549	8271.48	2.33065	1.1739	6.83082e-07	1.00326e-05	up
UBL4A	710.811	1478.35	2.07981	1.0254	6.95707e-07	1.01882e-05	up
KCNK5	15.1674	32.4126	2.13699	1.05987	7.01759e-07	1.0262e-05	up
LRRC70	6.41852	20.4104	3.17993	1.53111	7.08899e-07	1.0344e-05	up
ETV7	97.4153	342.62	3.51711	1.66743	7.09259e-07	1.03447e-05	up
LRRC71	2.31361	7.94825	3.43544	1.66046	7.19879e-07	1.04951e-05	up
MYH15	2.77954	7.40988	2.66587	1.36302	7.37026e-07	1.07172e-05	up
PRDX3P1	14.2972	46.3991	3.24534	1.56953	7.4402e-07	1.08002e-05	up
GLOD5	0.725226	7.71915	10.6438	2.55586	7.50674e-07	1.08921e-05	up
GNA15	542.58	1132.08	2.08648	1.02935	7.68493e-07	1.1117e-05	up
WHAMMP2	246.692	607.686	2.46334	1.2425	8.00163e-07	1.15256e-05	up
MIR503HG	13.7203	35.1433	2.56141	1.29361	8.03046e-07	1.15572e-05	up
RPLP2P1	0.0931054	4.75586	51.0804	2.91571	8.05511e-07	1.15827e-05	up
IGKJ3	13.4245	36.1401	2.69209	1.3594	8.1303e-07	1.16709e-05	up
MERTK	92.8523	219.774	2.36692	1.19154	8.14803e-07	1.16832e-05	up
HERC5	455.154	1110.05	2.43884	1.23138	8.15275e-07	1.16832e-05	up
MT-CO1	185523	434863	2.34398	1.18049	8.39085e-07	1.20039e-05	up
IGLV7-46	51.372	230.706	4.4909	1.9206	8.45691e-07	1.20933e-05	up
CRNDE	2.49301	8.60716	3.45252	1.61189	8.64186e-07	1.23368e-05	up
STAB1	4645.1	9714.41	2.09133	1.03251	8.74917e-07	1.24793e-05	up
NUPR1	0.903784	5.09186	5.63393	2.0999	8.90184e-07	1.2681e-05	up
AP1M2	38.0297	126.799	3.3342	1.60214	8.90901e-07	1.26858e-05	up
IGKV3OR2-268	1.55183	9.4503	6.08978	2.2032	9.30576e-07	1.31893e-05	up
PLSCR4	3.0026	12.0809	4.02349	1.79225	9.35125e-07	1.32482e-05	up
ARHGAP23	18.8617	39.8724	2.11394	1.04934	9.76009e-07	1.37925e-05	up
SEMA3G	19.0341	43.977	2.31043	1.17063	9.75991e-07	1.37925e-05	up
TEX14	5.76257	15.7248	2.72878	1.35522	9.83668e-07	1.38949e-05	up
CYP2F2P	9.09663	23.9937	2.63765	1.30324	9.86845e-07	1.39223e-05	up
MT-RNR2	272993	812034	2.97456	1.47201	1.00308e-06	1.41453e-05	up
GAL3ST2	2.26965	11.7556	5.17945	2.03814	1.02119e-06	1.43707e-05	up
NPTX1	13.8291	41.1165	2.9732	1.47365	1.02837e-06	1.44596e-05	up
MT1H	0.0851897	10.8921	127.857	2.96412	1.06752e-06	1.49413e-05	up
MT-TV	257.329	889.249	3.45569	1.64211	1.07141e-06	1.49895e-05	up
KLC3	0.237785	3.81202	16.0314	2.67538	1.08358e-06	1.51471e-05	up
NECTIN2	121.253	290.926	2.39933	1.208	1.10366e-06	1.53958e-05	up
JCHAIN	3044.85	11169.9	3.66845	1.7072	1.11674e-06	1.55528e-05	up
UBAC2-AS1	8.4094	17.516	2.0829	1.02728	1.13229e-06	1.57495e-05	up
WDR11-AS1	80.2678	224.99	2.803	1.39831	1.14853e-06	1.59424e-05	up
IFI6	2646.53	8368.52	3.16207	1.54167	1.17905e-06	1.62988e-05	up
PTP4A2P2	43.3563	131.431	3.03142	1.49181	1.18474e-06	1.63639e-05	up
MT-TR	162.973	659.529	4.04686	1.80894	1.191e-06	1.64369e-05	up
IGLV2-11	131.898	492.744	3.73579	1.72589	1.21905e-06	1.67758e-05	up
PLPP3	6.02174	16.4907	2.73853	1.34456	1.28168e-06	1.75301e-05	up
HIST4H4	40.6691	83.8981	2.06294	1.00762	1.29509e-06	1.76919e-05	up
DNAH10OS	44.8716	100.215	2.23338	1.11059	1.29738e-06	1.77088e-05	up
IRS1	143.398	303.472	2.11629	1.04433	1.29948e-06	1.77302e-05	up
PPP1R14C	7.24087	24.8305	3.42922	1.62799	1.34207e-06	1.82373e-05	up
RAB20	181.004	416.523	2.30118	1.15422	1.37988e-06	1.86847e-05	up
GPRC5D-AS1	4.99454	15.7763	3.1587	1.51135	1.38e-06	1.86847e-05	up
ARHGAP42	16.1803	38.5431	2.3821	1.20153	1.38631e-06	1.87336e-05	up
MIR5685	1.35864	6.66207	4.90347	1.97146	1.399e-06	1.88887e-05	up
GBP1	982.442	2224.38	2.26413	1.13435	1.40152e-06	1.89151e-05	up
PHLDA1	61	143.9	2.35902	1.18588	1.42605e-06	1.92154e-05	up
SLC30A1	383.305	844.442	2.20306	1.09869	1.4593e-06	1.96241e-05	up
MT-RNR1	111730	343788	3.07695	1.50822	1.48222e-06	1.98846e-05	up
PIMREG	3.0837	10.8505	3.51866	1.68365	1.49171e-06	1.9988e-05	up
PIM3	2348.39	5097.22	2.17051	1.07953	1.49503e-06	2.00245e-05	up
HIST1H1D	3.6869	19.9463	5.41004	2.089	1.49851e-06	2.00631e-05	up
CXCL13	1.20407	7.37896	6.12836	2.18577	1.5011e-06	2.00738e-05	up
TMIGD3	7.76871	41.61	5.3561	2.06854	1.50903e-06	2.01552e-05	up
PPBPP2	0.726287	5.33508	7.34569	2.28062	1.5336e-06	2.04352e-05	up
NXF3	15.9984	507.973	31.7515	2.85179	1.55869e-06	2.07285e-05	up
KCNJ4	0.571609	4.29032	7.50569	2.34602	1.56179e-06	2.07532e-05	up
KLHL35	18.9443	57.9557	3.05927	1.49834	1.57875e-06	2.09455e-05	up
CLDN5	224.741	770.08	3.42652	1.62877	1.59329e-06	2.113e-05	up
SCGB1C1	8.80634	30.9352	3.51283	1.6486	1.63222e-06	2.16123e-05	up
CHD1	1144.59	2460.11	2.14934	1.06636	1.6816e-06	2.22049e-05	up
REXO5	23.4585	48.4348	2.0647	1.01476	1.68962e-06	2.22933e-05	up
CCSER1	11.1069	30.1291	2.71265	1.3524	1.71188e-06	2.25428e-05	up
ANXA10	0.740888	4.22847	5.7073	2.1127	1.7233e-06	2.26665e-05	up
HBA2	2880.93	22422.4	7.78306	2.34908	1.78582e-06	2.33791e-05	up
MT-ND2	73668.1	190613	2.58745	1.30054	1.83484e-06	2.39928e-05	up
OLFML2A	14.9908	41.2533	2.75191	1.37514	1.8379e-06	2.40049e-05	up
SPDEF	1.20861	5.4946	4.54623	1.91926	1.85831e-06	2.42337e-05	up
H19	0.496882	5.41116	10.8902	2.53187	1.87287e-06	2.44046e-05	up
MT1X	82.4848	272.947	3.30906	1.58818	1.89315e-06	2.46498e-05	up
MT-ND5	47429	124367	2.62216	1.31664	1.8972e-06	2.4693e-05	up
IGKV1D-12	4.24333	21.9338	5.16901	2.04007	1.91151e-06	2.486e-05	up
IGLC2	4021.97	15162.8	3.77	1.72883	1.93053e-06	2.50686e-05	up
MT-TS1	16.8304	54.032	3.21038	1.54934	1.93721e-06	2.51456e-05	up
MT-ND1	79626.3	215001	2.70013	1.35191	1.97868e-06	2.56344e-05	up
SLC4A1	19.3744	145.014	7.48481	2.31748	1.99653e-06	2.58462e-05	up
IGLV10-54	20.2222	103.496	5.11796	2.02468	2.00365e-06	2.59179e-05	up
C2-AS1	0.818913	4.32899	5.28627	2.02981	2.02163e-06	2.61404e-05	up
FHL1	244.478	700.361	2.86473	1.42142	2.05699e-06	2.65568e-05	up
MIR3662	1.08511	4.94664	4.55867	1.88895	2.08134e-06	2.68505e-05	up
SERPINE2	54.445	161.083	2.95864	1.45861	2.09431e-06	2.69972e-05	up
SORBS1	12.6785	31.8802	2.51451	1.25132	2.10129e-06	2.70664e-05	up
TAX1BP3	33.7394	75.6003	2.24071	1.1163	2.196e-06	2.81891e-05	up
C17orf53	17.2046	35.5799	2.06804	1.02759	2.20612e-06	2.83082e-05	up
ADRA2A	22.3891	74.4475	3.32517	1.5864	2.22979e-06	2.85793e-05	up
RRM2P3	14.4179	36.8953	2.559	1.26471	2.29524e-06	2.92619e-05	up
IGKV1-17	39.3108	329.378	8.37881	2.38481	2.3035e-06	2.93561e-05	up
IFNG	47.396	126.253	2.6638	1.33382	2.34082e-06	2.97979e-05	up
PTPRU	6.8643	19.4619	2.83524	1.40631	2.48063e-06	3.13756e-05	up
ACVRL1	33.3945	76.3242	2.28553	1.1442	2.54073e-06	3.20513e-05	up
IFITM10	14.2954	52.8876	3.69961	1.70103	2.54939e-06	3.21486e-05	up
SH2D4A	1.89852	9.15708	4.82328	1.97137	2.62347e-06	3.30331e-05	up
MT-TA	48.6002	184.625	3.79885	1.73093	2.67854e-06	3.36132e-05	up
DDX18P1	5.11779	14.8944	2.91032	1.41448	2.7662e-06	3.46099e-05	up
SWI5	126.467	263.137	2.08068	1.02124	2.8213e-06	3.52337e-05	up
PLIN2	490.853	1058.39	2.15623	1.06885	2.83647e-06	3.541e-05	up
SAMD9L	1548.5	3281.08	2.11888	1.04636	2.90213e-06	3.61225e-05	up
MTND4P12	10.8951	60.634	5.56523	2.07896	2.93517e-06	3.65066e-05	up
HIST3H2BB	5.27771	11.5904	2.19611	1.10044	2.94429e-06	3.6593e-05	up
MEST	48.3697	106.503	2.20186	1.08945	2.98045e-06	3.7015e-05	up
PHBP9	40.1883	89.1599	2.21855	1.10047	3.00721e-06	3.72818e-05	up
LAG3	367.662	992.865	2.70048	1.34949	3.00691e-06	3.72818e-05	up
KLHL14	82.3553	249.084	3.02451	1.48302	3.02605e-06	3.74568e-05	up
RNY3P8	1.40857	7.33218	5.2054	2.00743	3.06759e-06	3.78873e-05	up
GRASP	322.664	1151.88	3.56989	1.66472	3.0777e-06	3.79843e-05	up
HPN	4.6009	13.3726	2.90651	1.42792	3.22664e-06	3.96478e-05	up
HIST1H2BE	9.27391	27.3014	2.94389	1.44186	3.24897e-06	3.98785e-05	up
FABP4	0.324734	3.14764	9.69299	2.416	3.30084e-06	4.04856e-05	up
PTGES3L	3.32346	12.1547	3.65725	1.65712	3.32663e-06	4.07276e-05	up
IGLV2-18	23.4615	88.7044	3.78084	1.72489	3.33874e-06	4.08312e-05	up
AKAP2	1.69226	5.1895	3.0666	1.50597	3.34972e-06	4.0906e-05	up
LCN2	351.458	1112.26	3.1647	1.53191	3.35464e-06	4.09363e-05	up
PYCR1	24.3948	70.381	2.88509	1.43477	3.37142e-06	4.10964e-05	up
FAM72D	10.3425	21.9827	2.12548	1.06457	3.44171e-06	4.18016e-05	up
KLHDC8A	1.55285	10.0125	6.44783	2.19083	3.49389e-06	4.23894e-05	up
MT-CO2	74076.6	157811	2.13038	1.05268	3.53233e-06	4.28094e-05	up
FUT1	1.71016	8.35426	4.88509	1.94182	3.56674e-06	4.31798e-05	up
ACER2	15.7309	37.5779	2.3888	1.18129	3.60922e-06	4.35999e-05	up
MT-TW	30.8462	109.768	3.55855	1.65657	3.85393e-06	4.62238e-05	up
CDR2L	11.6705	37.3302	3.19868	1.54065	3.96235e-06	4.74227e-05	up
FFAR1	22.8287	74.5829	3.26706	1.56552	4.03925e-06	4.83086e-05	up
HOMER2	91.2441	232.438	2.54743	1.27452	4.04454e-06	4.83546e-05	up
MIR221	1.33656	6.00272	4.49117	1.86319	4.10366e-06	4.89571e-05	up
RPS29P16	0.896217	3.97889	4.43965	1.84708	4.13372e-06	4.92806e-05	up
CBX3P9	3.23275	7.8085	2.41543	1.20034	4.15999e-06	4.95412e-05	up
IL21	1.12484	4.4682	3.9723	1.80036	4.16772e-06	4.96157e-05	up
DUSP10	150.324	322.235	2.1436	1.05838	4.21798e-06	5.0151e-05	up
PLA2G4C	60.9885	160.423	2.63038	1.31281	4.2388e-06	5.03727e-05	up
STAM-AS1	0.475808	2.69529	5.66466	2.10046	4.32895e-06	5.13532e-05	up
BHLHA15	18.0642	56.4598	3.1255	1.52134	4.37319e-06	5.18231e-05	up
ASS1	1.27502	5.89108	4.62037	1.95015	4.40575e-06	5.20622e-05	up
SPIC	0.405761	3.50058	8.62719	2.34095	4.46639e-06	5.25755e-05	up
CFAP74	0.851373	5.12784	6.02302	2.10483	4.49798e-06	5.28917e-05	up
GLYATL1P2	10.7594	27.8708	2.59036	1.28852	4.50633e-06	5.29529e-05	up
ECM1	20.3868	42.3868	2.07913	1.00877	4.51237e-06	5.30053e-05	up
PPP1R14A	128.585	319.311	2.48328	1.24447	4.60424e-06	5.3915e-05	up
IGKV2D-28	29.4139	108.404	3.68547	1.69405	4.75888e-06	5.55324e-05	up
TP53TG3D	1.58044	8.96173	5.6704	2.06113	4.79174e-06	5.58164e-05	up
CADM2	5.10891	16.1191	3.15509	1.5146	4.88616e-06	5.67223e-05	up
FUT8-AS1	8.85147	20.7457	2.34376	1.15823	4.94694e-06	5.73289e-05	up
DNAH12	5.15388	13.8467	2.68665	1.32194	4.96753e-06	5.75476e-05	up
MT-TN	1799.6	4111.13	2.28447	1.14045	4.98708e-06	5.77145e-05	up
SCN1B	232.095	717.943	3.09332	1.50164	5.21346e-06	5.99833e-05	up
DKK1	0.101114	4.53955	44.8954	2.73223	5.37124e-06	6.1651e-05	up
MT-TM	158.13	540.121	3.41567	1.60936	5.51457e-06	6.31668e-05	up
SNORD13E	1.11248	8.05923	7.24441	2.23448	5.58997e-06	6.39432e-05	up
HIST1H3G	1.52252	6.45336	4.23859	1.88332	5.64089e-06	6.44818e-05	up
TNFRSF12A	48.8478	177.144	3.62644	1.67114	5.79337e-06	6.60229e-05	up
TWIST1	0.992969	5.09965	5.13576	1.97704	5.91282e-06	6.73384e-05	up
SNORA71C	6.47313	14.2946	2.2083	1.09477	6.03339e-06	6.84796e-05	up
HIPK1-AS1	3.22004	10.2042	3.16897	1.51412	6.09846e-06	6.91248e-05	up
ACSBG1	22.7776	63.4334	2.78491	1.36866	6.11091e-06	6.92425e-05	up
SNX9	320.098	686.13	2.1435	1.05795	6.16975e-06	6.98622e-05	up
VDAC2P3	0.754807	3.78992	5.02105	1.97366	6.16849e-06	6.98622e-05	up
IGKV3D-20	13.438	67.0702	4.99109	1.97733	6.20168e-06	7.01507e-05	up
GNG4	1.18265	5.41774	4.58103	1.91376	6.21535e-06	7.02602e-05	up
UBE2D3P1	5.51473	12.1071	2.19542	1.08406	6.3155e-06	7.12965e-05	up
IGKV3D-7	0.47415	5.27143	11.1176	2.4639	6.36935e-06	7.17357e-05	up
NDUFA5P11	4.32307	10.9706	2.53769	1.22675	6.43872e-06	7.242e-05	up
LY6E	5153.95	11051.5	2.14428	1.05887	6.63977e-06	7.43332e-05	up
HIST1H4D	2.5005	13.6134	5.44425	2.04539	6.72156e-06	7.51737e-05	up
IGLV9-49	31.1411	127.318	4.08841	1.79054	6.87283e-06	7.67124e-05	up
EDN2	0.453356	3.76336	8.30112	2.28958	7.09064e-06	7.89077e-05	up
DUTP2	0.629671	4.05447	6.43903	2.14253	7.1913e-06	8.00014e-05	up
ST7-AS1	4.96568	12.596	2.53662	1.24219	7.24398e-06	8.05342e-05	up
PLA2G4A	45.3876	106.518	2.34685	1.169	7.27395e-06	8.08139e-05	up
FAM111B	34.7689	83.5745	2.40372	1.20594	7.31425e-06	8.11812e-05	up
IGHV1-2	33.4665	163.498	4.88543	1.94899	7.45438e-06	8.26546e-05	up
DUBR	14.3065	32.212	2.25156	1.09937	7.53438e-06	8.34866e-05	up
CYS1	0.85168	5.28784	6.20872	2.11718	7.5953e-06	8.40231e-05	up
KANK2	19.076	41.7776	2.19006	1.07827	7.77411e-06	8.56863e-05	up
GIPC3	77.4046	190.853	2.46566	1.23041	8.08814e-06	8.86583e-05	up
ETF1P2	2.40063	7.67785	3.19826	1.51608	8.59582e-06	9.34614e-05	up
TNFAIP8L3	0.23728	3.17724	13.3902	2.47679	8.67047e-06	9.42122e-05	up
MT-TQ	72.2796	275.691	3.81424	1.71564	8.73211e-06	9.47288e-05	up
TMED10P2	1.04733	4.80659	4.58937	1.86451	8.88788e-06	9.62634e-05	up
TAGLN2P1	4.37344	12.5962	2.88016	1.39328	9.00556e-06	9.73197e-05	up
OIP5	10.4469	23.9277	2.29042	1.15445	9.26479e-06	9.96713e-05	up
MYCBP2-AS1	2.34532	7.75728	3.30756	1.53878	9.43582e-06	0.000101317	up
SRC	724.213	1498.49	2.06913	1.0111	9.51636e-06	0.000102149	up
CYP2W1	1.43374	6.03277	4.20772	1.78745	9.70997e-06	0.000103962	up
CLEC2L	31.2841	134.654	4.30423	1.82747	9.76204e-06	0.000104486	up
SPANXN4	0.493245	4.2546	8.62573	2.28632	1.01224e-05	0.000107897	up
INAVA	3.86924	12.3373	3.18856	1.52902	1.02809e-05	0.000109377	up
BEX1	6.02151	31.0069	5.14936	1.97383	1.06083e-05	0.000112469	up
PDZD2	33.3703	72.2984	2.16655	1.05973	1.06558e-05	0.000112902	up
FAM187B2P	1.02886	5.83978	5.67599	2.03703	1.06935e-05	0.000113265	up
IGKV1-13	1.4989	6.91981	4.6166	1.89102	1.08123e-05	0.000114343	up
IGHV3-7	145.209	516.448	3.55659	1.64226	1.08705e-05	0.000114834	up
VAC14-AS1	3.8977	11.6399	2.98635	1.44661	1.09027e-05	0.000115082	up
MAOA	1.18652	13.237	11.1562	2.42683	1.10047e-05	0.00011605	up
IGKV2-28	50.8598	237.938	4.67832	1.90133	1.10798e-05	0.000116768	up
SLC16A14	6.49516	19.7631	3.04275	1.48085	1.1125e-05	0.000117171	up
AXL	21.6285	60.4952	2.79701	1.38039	1.1393e-05	0.000119582	up
MATR3	58.53	122.879	2.09942	1.02669	1.14323e-05	0.000119808	up
CA3-AS1	6.74092	18.7709	2.78462	1.35215	1.14433e-05	0.000119885	up
CLIP2	577.128	1250.83	2.16734	1.06969	1.15289e-05	0.000120631	up
CMBL	5.73445	19.7715	3.44784	1.5958	1.16745e-05	0.000121966	up
DPEP1	0.924041	5.1175	5.53818	2.05254	1.17121e-05	0.000122282	up
SEMA3F	0.342212	6.30317	18.4189	2.55727	1.18417e-05	0.000123252	up
SH3RF2	9.15704	27.8115	3.03717	1.47335	1.22439e-05	0.000127046	up
SNORA71A	4.76019	9.96401	2.0932	1.02607	1.25282e-05	0.000129635	up
DRP2	2.18386	6.0052	2.74981	1.39813	1.33042e-05	0.000136531	up
VWF	160.98	431.404	2.67987	1.32776	1.34208e-05	0.000137559	up
CFAP161	37.5635	111.701	2.97365	1.44478	1.34273e-05	0.000137584	up
ENC1	291.881	603.351	2.06711	1.00849	1.34924e-05	0.000138205	up
ELOCP2	3.85466	8.18856	2.12433	1.03193	1.3517e-05	0.000138292	up
C4BPB	7.23184	18.7307	2.59004	1.28436	1.36046e-05	0.000139104	up
MISP3	132.012	336.027	2.54544	1.2671	1.39184e-05	0.000142054	up
GPER1	30.0751	79.396	2.63993	1.31061	1.4887e-05	0.000151068	up
KITLG	2.2159	8.23199	3.71496	1.68496	1.48924e-05	0.000151076	up
FRRS1	17.4733	36.9728	2.11596	1.03027	1.49284e-05	0.000151396	up
AURKA	35.6854	74.3298	2.08292	1.02603	1.49921e-05	0.000151858	up
TUBB6	222.591	525.753	2.36196	1.17592	1.5066e-05	0.000152485	up
MTSS1L	25.7967	55.3745	2.14657	1.04685	1.5128e-05	0.000152912	up
KLHDC8B	179.697	484.814	2.69796	1.33505	1.5139e-05	0.000152955	up
IGLV2-5	6.80981	23.5468	3.45778	1.61316	1.5295e-05	0.000154276	up
PLCB4	3.66463	11.3265	3.09077	1.46125	1.53547e-05	0.00015472	up
BEND7	16.8973	64.8837	3.83988	1.71082	1.53723e-05	0.000154824	up
ZDHHC4P1	1.64818	6.87094	4.16879	1.77111	1.56506e-05	0.000157249	up
IGKV1D-17	3.94408	32.7156	8.29488	2.27453	1.6111e-05	0.000161345	up
SPARCL1	0.931039	5.54918	5.9602	2.06404	1.63835e-05	0.000163345	up
SCGB1C2	8.42783	28.8274	3.4205	1.59027	1.64441e-05	0.0001639	up
TMEM163	16.3024	37.3305	2.28988	1.12797	1.68449e-05	0.000167671	up
DLGAP1	3.77927	10.9813	2.90568	1.42226	1.71557e-05	0.000170034	up
ZYG11A	3.44299	10.2431	2.97507	1.43619	1.72922e-05	0.000171185	up
BTG3-AS1	4.43945	11.3628	2.55951	1.25862	1.7842e-05	0.000176162	up
PLK1	92.447	201.638	2.18112	1.07906	1.86155e-05	0.0001831	up
MT-TG	120.719	371.761	3.07956	1.48064	1.86949e-05	0.000183719	up
ACKR1	0.0897352	3.78001	42.124	2.57528	1.88253e-05	0.000184677	up
STK19B	3.10308	24.7302	7.96955	2.24006	1.92774e-05	0.000188535	up
AFAP1	109.524	251.325	2.2947	1.13625	1.95429e-05	0.000190768	up
MAPK10	10.8855	25.4239	2.33558	1.14874	1.99592e-05	0.000194157	up
APLP1	1.84201	6.97739	3.78792	1.67944	2.0371e-05	0.000197763	up
IGKV2D-24	1.22163	5.23385	4.28432	1.81975	2.05252e-05	0.000199145	up
GRTP1	38.8565	82.606	2.12592	1.03808	2.07427e-05	0.000200907	up
NAP1L4P1	11.431	43.2796	3.78616	1.68842	2.09539e-05	0.000202661	up
FN1	54.5531	225.927	4.14141	1.77401	2.12209e-05	0.000204949	up
MIR3136	1.57432	6.65654	4.22821	1.76892	2.17466e-05	0.000209424	up
SLC9C1	0.496953	2.69485	5.42275	1.97223	2.23861e-05	0.000214844	up
CSAG3	0.0471784	2.66958	56.5847	2.50536	2.27099e-05	0.000217579	up
GAPDHP42	3.24036	13.7016	4.22843	1.78138	2.2928e-05	0.000219425	up
RGN	0.323376	2.55797	7.91021	2.17852	2.32937e-05	0.000222791	up
SLAMF9	1.86715	7.32062	3.92074	1.72369	2.40162e-05	0.000229049	up
PROSER2-AS1	2.05802	8.01257	3.89334	1.68115	2.4282e-05	0.000231322	up
ETV5	6.82503	16.4465	2.40974	1.18882	2.48556e-05	0.000236185	up
PRAL	8.9524	21.8778	2.4438	1.21697	2.50788e-05	0.000238104	up
WWC1	14.9496	34.9254	2.3362	1.15086	2.52438e-05	0.000239467	up
PKD2L1	3.89197	11.3876	2.92593	1.42809	2.54355e-05	0.000241013	up
RN7SL749P	1.58068	6.61198	4.18299	1.76697	2.62182e-05	0.000247176	up
SNORD59A	6.56839	16.076	2.44748	1.2049	2.74289e-05	0.000257651	up
FAM72C	3.49868	9.66753	2.76319	1.36373	2.79362e-05	0.000261977	up
LAMC1	85.1249	179.756	2.11167	1.03262	2.8267e-05	0.00026471	up
HIST1H2AB	0.617796	3.54396	5.73646	2.02823	2.86873e-05	0.000268123	up
CD5L	1.19186	6.05526	5.08053	1.95333	2.88194e-05	0.000269282	up
CDC20	61.7977	181.384	2.93512	1.42634	2.89225e-05	0.000270096	up
H2BFS	0.330202	2.26286	6.85294	2.08062	2.91984e-05	0.000272446	up
RF00019	21.7641	53.5174	2.45898	1.21677	2.92817e-05	0.000273147	up
SYT5	0.707526	9.32811	13.1841	2.39074	3.0124e-05	0.000280537	up
IGKV4-1	446.365	1576.66	3.53222	1.61626	3.01671e-05	0.000280793	up
AFAP1-AS1	5.25534	16.458	3.13168	1.47426	3.02384e-05	0.000281291	up
SOX21-AS1	0.637766	3.88463	6.091	2.05249	3.04413e-05	0.000282943	up
KALRN	34.6772	78.6723	2.2687	1.11551	3.06653e-05	0.000284789	up
ASXL3	2.1976	10.2822	4.67883	1.85383	3.12743e-05	0.000289645	up
GPR137C	2.59376	6.13486	2.36523	1.17885	3.13422e-05	0.000290194	up
DDIT4	441.562	994.58	2.25241	1.11311	3.15171e-05	0.000291653	up
CYP4A22-AS1	0.371422	3.0002	8.07762	2.18993	3.18972e-05	0.000294602	up
MT-TI	95.8092	330.626	3.45088	1.59115	3.20949e-05	0.000296051	up
FAM217A	2.67879	8.04832	3.00447	1.42767	3.33404e-05	0.0003065	up
WASF3	15.6476	47.8033	3.055	1.45712	3.35456e-05	0.000308134	up
ANKDD1B	8.8981	23.2652	2.61462	1.27673	3.39283e-05	0.000311479	up
DOCK1	11.1514	26.2671	2.35549	1.15413	3.43821e-05	0.000315129	up
OSMR	13.0991	36.9266	2.81901	1.36956	3.45451e-05	0.000316277	up
RPS20P4	0.556016	3.16963	5.70061	1.96658	3.50092e-05	0.00031957	up
IGLJ1	0.423619	2.87946	6.79728	2.11898	3.52699e-05	0.000321687	up
MYH6	0.176848	2.48253	14.0376	2.31092	3.59939e-05	0.000327402	up
SIGLEC11	27.0193	75.5596	2.7965	1.36571	3.60966e-05	0.00032807	up
SNORD17	5.41675	13.9313	2.5719	1.27868	3.66117e-05	0.000332213	up
IGKV2-29	28.4162	123.191	4.33523	1.80016	3.6649e-05	0.000332372	up
ZNHIT1P1	0.431265	2.74063	6.35485	2.03597	3.74797e-05	0.000339082	up
GLYATL2	2.04625	9.77707	4.77804	1.86022	3.7668e-05	0.000340694	up
MIR3648-1	1.54593	5.6477	3.65328	1.6517	3.77713e-05	0.000341444	up
PRDM7	0.572044	4.10675	7.17908	2.13013	3.98806e-05	0.000358393	up
EPDR1	19.0054	43.3712	2.28205	1.12532	3.99636e-05	0.00035885	up
TCAF2C	1.00238	4.35806	4.34771	1.75703	4.08591e-05	0.000366328	up
TNXA	4.01483	15.7803	3.9305	1.691	4.17243e-05	0.000373563	up
STX17-AS1	1.88228	5.60242	2.97641	1.41197	4.23466e-05	0.000378731	up
HIST1H4B	0.919804	4.15308	4.51518	1.86283	4.24111e-05	0.000379106	up
USP12-AS2	3.60446	12.1443	3.36926	1.54591	4.24846e-05	0.000379561	up
TKTL2	3.16558	11.0986	3.50604	1.58612	4.27558e-05	0.000381782	up
DGKI	1.50694	7.70524	5.11318	1.90639	4.35257e-05	0.000387935	up
SPRY2	28.9474	66.6276	2.30168	1.13448	4.38952e-05	0.000390918	up
ENTHD1	1.3197	5.37594	4.07359	1.7023	4.38944e-05	0.000390918	up
MMP2	0.602834	4.64805	7.71034	2.16297	4.45473e-05	0.00039641	up
KCNMA1	18.9034	75.3526	3.98619	1.72058	4.48239e-05	0.000398449	up
APOC1	1.17762	4.77441	4.05427	1.73438	4.57655e-05	0.000405212	up
IGFL2	0.684705	3.69915	5.40255	1.98655	4.64908e-05	0.000410769	up
F3	3.11708	11.1558	3.57892	1.604	4.66541e-05	0.000411984	up
IGKV1D-27	0.450273	3.74381	8.31453	2.19468	4.73146e-05	0.000416951	up
CREB3L3	2.58513	12.0216	4.65029	1.8511	4.73761e-05	0.000417275	up
IRX3	11.3258	46.9898	4.1489	1.74834	4.82018e-05	0.000423881	up
IL13	1.82288	5.68654	3.11954	1.45034	4.83614e-05	0.000425173	up
MPL	26.1857	70.4911	2.69197	1.31202	4.88518e-05	0.000428923	up
SLCO5A1	9.89227	25.1064	2.53798	1.26129	4.92454e-05	0.000432041	up
EIF4A1P2	1.27879	3.82435	2.99059	1.45647	4.93378e-05	0.000432739	up
YWHAEP1	0.350362	1.85742	5.30143	1.87787	4.96765e-05	0.000435369	up
VSIG2	424.932	1065	2.50629	1.23764	5.07933e-05	0.000443422	up
CXCL12	0.134406	2.10449	15.6577	2.26574	5.12738e-05	0.000447152	up
ABCA6	8.3948	22.6484	2.69791	1.31123	5.13989e-05	0.000448127	up
SNAI1	18.9087	49.1333	2.59844	1.27826	5.14983e-05	0.000448645	up
OSBPL10-AS1	1.8844	12.3925	6.57632	2.07953	5.24752e-05	0.000456564	up
HTR2B	1.89466	5.58222	2.94629	1.40873	5.27347e-05	0.000458466	up
UPK1A	2.11343	8.0797	3.82303	1.63401	5.28648e-05	0.000459241	up
PFKFB3	1015.04	2560.57	2.52263	1.24485	5.38597e-05	0.000466557	up
SLC6A11	0.523436	3.70529	7.07878	2.11392	5.41239e-05	0.000468605	up
IGKV1-9	46.0965	200.587	4.35145	1.7918	5.4565e-05	0.000472059	up
RPL23AP37	0.135548	1.5393	11.3561	2.08956	5.47862e-05	0.000473729	up
SLCO2A1	1.2833	6.31444	4.92048	1.86746	5.50057e-05	0.000475504	up
CCL25	1.41974	5.13025	3.6135	1.66056	5.5192e-05	0.000476747	up
MORC1	0.811435	3.95336	4.87206	1.83705	5.52199e-05	0.000476865	up
MZB1	1147.37	3486.95	3.03908	1.45105	5.69226e-05	0.000489166	up
MAP3K7CL	2668.05	5635.41	2.11218	1.02972	5.85358e-05	0.000501252	up
SPDYC	23.8914	112.003	4.688	1.84865	5.89614e-05	0.000504511	up
ACOD1	1.06575	5.94138	5.57485	1.96856	5.93645e-05	0.000506799	up
IL21-AS1	1.45556	5.1904	3.56592	1.60884	6.11869e-05	0.000520639	up
RF00568	1.10558	5.97263	5.40228	1.92331	6.31761e-05	0.000535261	up
TMEM155	2.47782	7.54335	3.04434	1.46037	6.32024e-05	0.000535349	up
GYPB	0.182196	3.65069	20.0372	2.38166	6.35149e-05	0.000537861	up
HIST2H2AA3	12.8138	50.697	3.95644	1.70595	6.4141e-05	0.000542207	up
IGLV5-45	19.3006	60.3847	3.12865	1.47982	6.46913e-05	0.000546309	up
SIK1B	330.453	776.522	2.34987	1.15937	6.53365e-05	0.000551342	up
IGLV2-8	188.424	580.556	3.08112	1.46347	6.55741e-05	0.000553069	up
ODF3	4.24201	14.7212	3.47033	1.58348	6.68818e-05	0.00056311	up
RDH12	1.39482	4.80261	3.44317	1.55544	6.82045e-05	0.000572956	up
PHKA1	2.70047	8.01888	2.96944	1.4476	6.83716e-05	0.000573929	up
FAM198A	16.6168	44.0349	2.65003	1.29148	6.86855e-05	0.000576276	up
C2orf66	1.59988	5.33995	3.33773	1.52918	6.91779e-05	0.000579539	up
GAS2L3	14.048	35.1848	2.50461	1.22032	6.96317e-05	0.00058247	up
CXCL5	341.51	909.711	2.66379	1.30385	7.15432e-05	0.000595939	up
SSUH2	0.744948	3.78326	5.07855	1.87729	7.36284e-05	0.000610886	up
NYAP2	1.23612	4.98099	4.02952	1.6783	7.41157e-05	0.000614172	up
HIST2H4B	10.1528	64.7975	6.38225	2.04524	7.42118e-05	0.000614817	up
HIST2H3D	5.74312	15.5566	2.70875	1.31904	7.44456e-05	0.000616257	up
SOCS2-AS1	29.0433	62.2388	2.14297	1.04366	7.51533e-05	0.000621239	up
MMP19	12.7405	28.1176	2.20694	1.0804	7.62606e-05	0.000629309	up
ELOVL3	10.2663	25.887	2.52155	1.24704	7.67706e-05	0.000633052	up
MARK2P9	0.475563	2.31224	4.8621	1.86378	7.85762e-05	0.000645723	up
COL10A1	5.74912	14.4334	2.51053	1.20856	7.99801e-05	0.000655178	up
DNAJC6	9.95337	23.5859	2.36964	1.14319	8.03323e-05	0.000657583	up
TCTEX1D1	7.67912	24.0352	3.12994	1.46233	8.14219e-05	0.000666177	up
DIRAS1	38.193	79.5833	2.08371	1.00732	8.15211e-05	0.000666826	up
DNAH7	2.57244	7.51854	2.92272	1.3719	8.39429e-05	0.00068375	up
ABCA1	245.567	563.126	2.29316	1.12814	8.42327e-05	0.000685837	up
KLF1	6.04233	18.286	3.02631	1.43808	8.43595e-05	0.00068637	up
SNORA55	9.6133	21.1202	2.19698	1.05676	8.49543e-05	0.000690041	up
LCA5	2.99996	9.60508	3.20174	1.47499	8.62879e-05	0.000699858	up
ACOX2	4.50374	12.1571	2.69935	1.31281	8.63455e-05	0.000700157	up
IGLV8-61	82.1721	482.677	5.87398	1.98652	8.71973e-05	0.000706275	up
SCN11A	2.68497	16.6216	6.19063	2.01772	8.74138e-05	0.000707624	up
ACOXL	7.44955	20.4731	2.74824	1.35142	8.88982e-05	0.000718085	up
APBB2	9.32469	25.3952	2.72344	1.32522	8.89598e-05	0.000718409	up
HTR1F	0.580707	2.67902	4.61337	1.80402	8.987e-05	0.000724195	up
ABCG2	5.42529	12.851	2.36871	1.16757	9.06199e-05	0.000729363	up
PLA2G2F	0.132432	1.77949	13.4369	2.15333	9.27142e-05	0.000743904	up
CAPN8	7.71506	17.3358	2.247	1.08352	9.2746e-05	0.000743979	up
SNCA-AS1	0.525061	2.79553	5.3242	1.92353	9.38846e-05	0.000751144	up
EPB42	4.11917	16.066	3.90031	1.67244	9.4319e-05	0.000753717	up
KDELC1	10.9843	22.6549	2.06247	1.01574	9.44677e-05	0.000754552	up
THAP12P3	0.26722	2.23954	8.3809	2.07438	9.57901e-05	0.000763663	up
RN7SL2	539.53	1162.21	2.15411	1.05124	9.64995e-05	0.000768772	up
ACHE	1.24828	4.89315	3.91991	1.68462	9.88981e-05	0.000785715	up
HSPB3	0.412712	3.55634	8.61699	2.17195	9.91294e-05	0.000787156	up
EDNRB	1.38757	6.02555	4.34253	1.73798	0.000100316	0.000795407	up
ST3GAL6-AS1	3.34695	10.9942	3.28483	1.49039	0.000101759	0.000804757	up
MEIS1-AS3	0.0969812	1.4048	14.4853	2.06939	0.000102896	0.000812604	up
HIST1H2APS4	0.163481	1.40153	8.57307	2.01382	0.00010442	0.000821934	up
DENND5B-AS1	2.28474	7.16636	3.13662	1.48596	0.000105873	0.000832404	up
GRK5-IT1	2.19219	7.62102	3.47645	1.5524	0.000106263	0.000834688	up
THCAT158	9.0436	25.9931	2.8742	1.37086	0.00010741	0.000842123	up
SPTA1	2.47165	10.0633	4.07149	1.6962	0.000109085	0.000854057	up
HBBP1	0.104888	3.49423	33.3138	2.35664	0.00010968	0.000857719	up
MAGI2-AS3	56.4818	189.864	3.3615	1.53956	0.000110102	0.000860219	up
IGFBP2	28.7304	100.585	3.501	1.57771	0.000110971	0.000866	up
HIST1H3A	7.43608	16.4493	2.2121	1.08788	0.000113991	0.000887713	up
ABO	87.2514	247.619	2.83799	1.36591	0.000114764	0.000892908	up
FCGR1A	344.905	789.202	2.28817	1.12321	0.000115126	0.000895308	up
OSBPL6	2.44063	7.69661	3.15353	1.45813	0.000115831	0.000900169	up
RNY1P16	4.06167	10.1141	2.49012	1.20611	0.000116589	0.00090501	up
RNY1P13	4.70317	10.9655	2.33152	1.12206	0.000117812	0.00091303	up
ACKR2	5.20953	14.8105	2.84296	1.35813	0.000120804	0.000932773	up
RNU7-75P	2.66809	10.2038	3.82439	1.6391	0.000121358	0.000936843	up
IGLV3-22	0.224691	2.76693	12.3144	2.23155	0.000121662	0.000938328	up
MAGI2	8.41671	17.6663	2.09896	1.00627	0.000127874	0.000981344	up
TMEM233	0.176958	2.0513	11.592	2.1418	0.000129428	0.000991852	up
SELE	1.40323	4.80435	3.42377	1.53806	0.000130009	0.000995847	up

## Sheet: Polyautoimmunity DEGs
Gene name	Count_Control	Count_polyautoimmunity	Fold change	log2 (Fold change)	Pvalue	FDR	Type
PSKH1	496.321	190.221	0.383263	-1.37648	3.58857e-43	1.15304e-38	down
CTDSP2	4830.33	2367.03	0.490035	-1.02442	1.97358e-39	1.26826e-35	down
SUN2	10472	5186.14	0.495237	-1.0088	2.71895e-36	1.24804e-32	down
ARHGAP30	10829.3	4712.42	0.435154	-1.19171	1.64094e-34	6.59062e-31	down
CCR3	184.698	9.11836	0.0493691	-3.91825	1.52715e-31	3.50491e-28	down
LBH	4009.5	1533.07	0.382359	-1.37215	1.60402e-30	3.43591e-27	down
LRCH4	1840.05	771.786	0.419438	-1.24256	4.99231e-30	1.00255e-26	down
MXRA8	386.837	114.266	0.295386	-1.72992	4.36718e-28	7.03646e-25	down
GRIN3B	152.392	37.2957	0.244735	-1.98354	3.04668e-27	3.76511e-24	down
CXCR2	3757.68	81.7735	0.0217617	-4.52628	4.69067e-26	5.037e-23	down
CPA3	67.5653	1.95999	0.0290089	-4.27516	1.94605e-25	2.01705e-22	down
ZFP41	113.815	46.9802	0.412776	-1.24709	5.60753e-24	3.75365e-21	down
AGAP2	1237.15	548.59	0.443429	-1.1608	1.61571e-23	9.98355e-21	down
TTLL12	679.335	317.795	0.467803	-1.0841	1.56728e-22	7.99339e-20	down
SRPK3	78.872	24.5052	0.310696	-1.65084	1.86535e-22	9.22086e-20	down
KCTD11	202.743	88.8099	0.438042	-1.18053	2.39985e-22	1.15089e-19	down
CXCR1	3328.5	53.3299	0.0160222	-4.52813	6.58503e-22	2.71261e-19	down
LAT	251.732	85.8479	0.341028	-1.52704	7.59343e-22	3.0498e-19	down
TMEM272	126.065	24.7728	0.196508	-2.25914	1.30095e-21	4.97629e-19	down
MMP25-AS1	1153.58	303.976	0.263506	-1.86723	2.57543e-21	9.62224e-19	down
ADGRL1	833.941	357.869	0.429129	-1.20717	3.994e-21	1.39491e-18	down
TNFRSF10C	1351.17	35.2292	0.0260732	-4.19926	5.96017e-21	1.95414e-18	down
ZSWIM9	311.792	138.877	0.445415	-1.15058	8.96219e-21	2.90873e-18	down
APC2	95.7714	46.7082	0.487705	-1.03179	9.50601e-21	3.05438e-18	down
RAVER1	636.88	298.784	0.469136	-1.07887	1.75037e-20	5.43452e-18	down
ZNF646	862.9	410.045	0.475194	-1.06328	2.54269e-20	7.56473e-18	down
HRH4	39.919	3.47291	0.0869988	-3.14344	7.39622e-20	1.99704e-17	down
PYGO2	1049.46	481.076	0.458402	-1.11384	2.23392e-19	5.74224e-17	down
BCL9L	3401.73	1021.96	0.300423	-1.68693	7.30122e-19	1.67568e-16	down
LILRA4	159.172	29.9599	0.188224	-2.29029	7.5724e-19	1.72559e-16	down
PDLIM2	1696.5	834.315	0.491787	-1.01293	7.66078e-19	1.73344e-16	down
RAB43	263.44	110.756	0.420423	-1.22938	1.17954e-18	2.50992e-16	down
FAM43A	268.919	88.4011	0.328728	-1.5706	1.2433e-18	2.6282e-16	down
EPHA1	306.528	138.443	0.451649	-1.13253	1.5755e-18	3.20396e-16	down
PRR12	1530.27	719.624	0.470259	-1.07609	1.67735e-18	3.38963e-16	down
CACNG8	36.2099	1.06327	0.0293642	-3.94375	1.99335e-18	3.92935e-16	down
MS4A2	108.396	4.08102	0.0376491	-3.81841	3.69272e-18	6.98034e-16	down
MAST3	2485.04	1060.42	0.426722	-1.21075	3.97341e-18	7.42265e-16	down
RAB4B	124.695	55.1637	0.44239	-1.16642	4.70575e-18	8.44787e-16	down
PPT2-EGFL8	24.8076	6.17552	0.248936	-1.94797	2.49181e-17	3.92472e-15	down
FCGR3B	7802.73	91.0536	0.0116695	-4.3113	3.7319e-17	5.45044e-15	down
PRX	140.44	67.0247	0.477248	-1.05829	4.62703e-17	6.66686e-15	down
MIR4537	116.81	28.4418	0.243488	-1.95041	4.81724e-17	6.90994e-15	down
SEMA4G	68.1334	19.3708	0.284307	-1.74785	6.19758e-17	8.62054e-15	down
RPL39P3	2582.04	744.477	0.288329	-1.73378	1.27609e-16	1.64667e-14	down
ZNF696	148.877	61.3762	0.41226	-1.25852	2.01157e-16	2.47639e-14	down
CLC	632.99	31.0511	0.0490547	-3.56321	2.0301e-16	2.48966e-14	down
ADAMTS7P1	33.9383	9.22718	0.271881	-1.81763	2.15457e-16	2.60257e-14	down
TUBB4A	38.5892	9.33182	0.241825	-1.98314	2.20681e-16	2.6557e-14	down
CHST14	244.007	113.96	0.467038	-1.08034	2.59338e-16	3.06352e-14	down
GBA	553.167	259.441	0.46901	-1.07465	2.61245e-16	3.07475e-14	down
CACNG6	33.5029	1.35048	0.0403094	-3.66603	2.95836e-16	3.41925e-14	down
CD4	4812.83	2118.38	0.440153	-1.16552	3.80553e-16	4.29037e-14	down
PRKCZ-AS1	125.11	57.1497	0.456794	-1.10706	4.40054e-16	4.87564e-14	down
ZNF469	165.227	53.3744	0.323037	-1.58812	5.00608e-16	5.48977e-14	down
ICAM3	1215.4	409.415	0.336855	-1.52647	6.02834e-16	6.49989e-14	down
SYNGAP1	1166.36	572.12	0.490519	-1.01464	6.69378e-16	7.14545e-14	down
MIB2	4686.51	1870.24	0.399069	-1.29951	6.72037e-16	7.15007e-14	down
MARK2	2555	1190.31	0.465877	-1.08633	1.04949e-15	1.0801e-13	down
SKI	1699.93	800.131	0.470686	-1.07233	1.05889e-15	1.0801e-13	down
SHANK1	21.7202	3.76843	0.173499	-2.34776	1.46151e-15	1.45386e-13	down
GPR157	91.7969	39.5517	0.43086	-1.18551	1.78446e-15	1.72701e-13	down
SCART1	485.624	146.655	0.301993	-1.6686	2.86024e-15	2.67158e-13	down
CHI3L1	542.456	19.4828	0.0359158	-3.69469	3.33982e-15	3.0314e-13	down
DPEP2	2979.17	1195.68	0.401347	-1.28997	5.50419e-15	4.75417e-13	down
SLC35C1	423.212	192.819	0.455607	-1.11464	7.16583e-15	5.9804e-13	down
DNASE1L3	36.4224	8.5971	0.236039	-1.99176	1.11169e-14	8.92994e-13	down
C15orf62	96.9553	45.9347	0.473772	-1.05462	1.147e-14	9.19056e-13	down
FLOT2	5778.68	2381.17	0.412061	-1.25315	1.32402e-14	1.04015e-12	down
RNASEL	414.079	181.362	0.437988	-1.16998	1.42459e-14	1.11101e-12	down
IGSF8	1103.11	521.948	0.473159	-1.06309	2.42615e-14	1.80451e-12	down
TWNK	181.973	76.5101	0.420447	-1.21643	2.52369e-14	1.87272e-12	down
CAPN5	127.178	60.0307	0.472021	-1.07093	3.13777e-14	2.28677e-12	down
MBD6	2804.45	1354.15	0.482856	-1.03576	3.1386e-14	2.28677e-12	down
TGFA	121.827	22.5527	0.18512	-2.26237	3.79513e-14	2.69186e-12	down
LRP10	5455.59	2320.87	0.425411	-1.20908	3.86084e-14	2.73244e-12	down
VPS9D1-AS1	183.918	68.2348	0.371007	-1.39664	4.01507e-14	2.82294e-12	down
MME	594.755	25.5093	0.0428904	-3.52122	4.98491e-14	3.43713e-12	down
ADGRE3	447.924	51.2555	0.114429	-2.76121	6.55352e-14	4.40525e-12	down
DHRS13	189.394	72.8294	0.384539	-1.34295	7.90702e-14	5.20616e-12	down
BCORL1	285.564	137.299	0.4808	-1.04355	1.00018e-13	6.46614e-12	down
PLD4	876.588	339.055	0.38679	-1.33665	1.19139e-13	7.58029e-12	down
CCDC188	54.0777	18.5849	0.343671	-1.48448	1.48823e-13	9.28512e-12	down
TRBV19	127.665	40.8099	0.319663	-1.59137	1.76358e-13	1.08555e-11	down
IL6R	3055.22	1297.21	0.424587	-1.21002	2.21854e-13	1.32745e-11	down
PAQR8	386.492	117.651	0.304406	-1.64991	2.2453e-13	1.34096e-11	down
CYBC1	4342.12	2056.93	0.473716	-1.06073	2.49468e-13	1.47076e-11	down
ARHGAP33	370.64	171.511	0.462743	-1.09257	4.3428e-13	2.44805e-11	down
FLT4	143.008	44.1334	0.308608	-1.63393	4.6246e-13	2.58873e-11	down
GIMAP6	1913.14	878.91	0.459407	-1.10216	4.82688e-13	2.68326e-11	down
TRIM46	172.617	80.3565	0.465518	-1.08036	5.76308e-13	3.12793e-11	down
KRT23	244.778	10.8615	0.0443729	-3.41524	8.09834e-13	4.25176e-11	down
C17orf113	26.0935	8.92021	0.341855	-1.47728	9.3979e-13	4.78548e-11	down
SBK1	962.554	433.767	0.450641	-1.12752	9.61391e-13	4.88178e-11	down
ZNF2	65.4158	25.6915	0.392741	-1.33653	1.09387e-12	5.48316e-11	down
CLDND2	503.822	161.198	0.31995	-1.5825	1.14577e-12	5.70772e-11	down
SAMD10	341.879	167.641	0.490352	-1.01315	1.36948e-12	6.68498e-11	down
METTL13	484.633	222.441	0.458988	-1.10234	1.48689e-12	7.20591e-11	down
SALL2	48.7577	14.4575	0.296518	-1.69156	1.60559e-12	7.68841e-11	down
AKAP12	68.1623	7.34509	0.107759	-2.76982	1.89253e-12	8.91626e-11	down
TRIM51EP	13.4732	0.15689	0.0116446	-3.68774	1.95039e-12	9.13606e-11	down
GSTM2	451.91	167.608	0.370888	-1.38839	2.18556e-12	1.01042e-10	down
PRAG1	377.543	154.614	0.409527	-1.25542	2.28432e-12	1.04555e-10	down
MANSC1	129.275	11.7703	0.0910487	-2.90253	2.42729e-12	1.10157e-10	down
ASB16	54.1559	19.818	0.365943	-1.40393	2.42071e-12	1.10157e-10	down
TOB2	1011.26	477.731	0.472413	-1.06355	2.8095e-12	1.25902e-10	down
BAIAP2-DT	524.421	229.31	0.437263	-1.17125	2.99786e-12	1.33044e-10	down
B4GAT1	83.1095	40.902	0.492146	-1.00496	3.24276e-12	1.42926e-10	down
SIGLEC7	318.254	113.888	0.357854	-1.43263	3.65203e-12	1.59218e-10	down
TREML2	457.716	140.898	0.307828	-1.62701	3.90047e-12	1.68676e-10	down
TMEM229B	512.729	234.055	0.456489	-1.10874	4.43837e-12	1.89388e-10	down
NAGS	29.0927	9.75101	0.33517	-1.5356	5.06897e-12	2.14304e-10	down
MZF1-AS1	54.1762	22.349	0.412523	-1.25525	5.4163e-12	2.28387e-10	down
CDH2	6.92242	0.0810275	0.0117051	-3.49149	5.81591e-12	2.42761e-10	down
RHOXF1P1	11.7399	0.231802	0.0197447	-3.57073	6.07156e-12	2.52658e-10	down
HDC	416.502	46.7587	0.112265	-2.71147	7.35139e-12	2.97491e-10	down
ALPL	1387.94	33.8622	0.0243975	-3.56879	7.61959e-12	3.06414e-10	down
GRIN1	11.344	1.36204	0.120066	-2.65446	8.13362e-12	3.24648e-10	down
ZNF213	294.881	132.098	0.447971	-1.13358	8.32909e-12	3.31215e-10	down
TMEM154	1443.14	651.742	0.451614	-1.12293	9.14836e-12	3.59787e-10	down
CHAD	39.7435	12.4219	0.312551	-1.5822	1.10037e-11	4.26489e-10	down
TCN1	68.7104	4.93596	0.0718372	-3.03179	1.24555e-11	4.76436e-10	down
FCGBP	731.933	271.471	0.370896	-1.38457	1.31295e-11	5.00431e-10	down
FGF22	12.274	2.38499	0.194312	-2.1055	1.56313e-11	5.82998e-10	down
C19orf71	188.068	90.905	0.483362	-1.02918	1.65243e-11	6.11683e-10	down
GATA2	832.563	145.443	0.174693	-2.2762	1.78228e-11	6.55974e-10	down
TEN1-CDK3	75.0814	30.1198	0.401162	-1.2704	2.01065e-11	7.32476e-10	down
NSUN5P2	153.842	66.8757	0.434703	-1.18217	2.2076e-11	7.98787e-10	down
EGR1	14675.9	2462.82	0.167814	-2.31377	2.50247e-11	8.91429e-10	down
PLVAP	26.7803	6.31522	0.235815	-1.93458	2.65156e-11	9.35204e-10	down
CADM4	59.101	18.4374	0.311964	-1.61162	2.72738e-11	9.58791e-10	down
MYCL	462.793	177.178	0.382844	-1.34235	2.91719e-11	1.01772e-09	down
NPTXR	139.976	51.0521	0.364721	-1.40305	2.94539e-11	1.02312e-09	down
EXTL3	1060.89	460.534	0.4341	-1.1747	3.15659e-11	1.08941e-09	down
CEP19	135.254	30.7898	0.227644	-1.98246	3.31251e-11	1.13712e-09	down
FCMR	3705.02	1817.76	0.490622	-1.0092	3.43725e-11	1.17492e-09	down
C1orf74	90.6183	34.4078	0.3797	-1.37063	3.7022e-11	1.25348e-09	down
EGFL8	25.9626	6.60422	0.254374	-1.85836	3.92089e-11	1.31918e-09	down
TRIM64B	9.77156	0.18609	0.0190441	-3.44174	4.13205e-11	1.38603e-09	down
LRFN1	366.657	98.7393	0.269296	-1.78139	4.13252e-11	1.38603e-09	down
PAGR1	116.883	50.9126	0.435587	-1.16041	4.54563e-11	1.50418e-09	down
PCDH1	72.1709	20.4484	0.283334	-1.72747	4.7863e-11	1.57248e-09	down
PEG13	78.742	35.1937	0.446949	-1.14085	4.84909e-11	1.58824e-09	down
DOC2GP	137.44	48.7439	0.354656	-1.44306	6.62754e-11	2.1105e-09	down
WLS	402.279	109.569	0.272371	-1.76614	6.79227e-11	2.15229e-09	down
NRCAM	41.6914	12.5811	0.301768	-1.66954	7.3885e-11	2.31836e-09	down
EPPK1	43.5281	12.8065	0.294211	-1.66951	7.70708e-11	2.40423e-09	down
LIME1	138.694	60.1747	0.433867	-1.17552	8.00427e-11	2.48969e-09	down
LCNL1	112.195	30.2902	0.269978	-1.79289	8.39665e-11	2.59167e-09	down
RIMBP3	10.8698	1.90169	0.174951	-2.29225	9.71174e-11	2.95292e-09	down
LRFN3	166.383	62.9291	0.378218	-1.3562	1.02754e-10	3.10005e-09	down
NAT8L	25.5001	4.4108	0.172972	-2.31934	1.08566e-10	3.25709e-09	down
MIR4697HG	222.521	77.351	0.347612	-1.46575	1.11345e-10	3.33422e-09	down
FBLN2	104.131	34.673	0.332975	-1.52611	1.12353e-10	3.35502e-09	down
AMIGO1	273.949	118.747	0.433463	-1.17693	1.13611e-10	3.38449e-09	down
GPR68	310.338	129.13	0.416096	-1.23137	1.15453e-10	3.43167e-09	down
EPHB1	113.149	11.7382	0.103742	-2.72575	1.24896e-10	3.66822e-09	down
CD3EAP	20.189	6.907	0.342118	-1.53109	1.46538e-10	4.2533e-09	down
KBTBD7	77.8805	36.5094	0.468788	-1.06498	1.78442e-10	5.09194e-09	down
SIGLEC17P	215.308	56.2785	0.261386	-1.81539	1.86506e-10	5.29852e-09	down
IL17RB	41.1815	16.0895	0.390696	-1.3199	2.03829e-10	5.74495e-09	down
SELPLG	7247.98	3051.27	0.420982	-1.21313	2.21642e-10	6.19807e-09	down
LRRC4	225.777	39.6641	0.175678	-2.23943	2.42124e-10	6.71241e-09	down
LCN12	60.4553	24.9056	0.411967	-1.22515	2.60395e-10	7.14496e-09	down
SGSM3	124.687	59.6099	0.478075	-1.04723	3.13268e-10	8.47989e-09	down
TMEM240	16.7582	2.66558	0.159062	-2.26739	3.20246e-10	8.64692e-09	down
RGS2	10072.1	2625.1	0.26063	-1.8104	3.25459e-10	8.75091e-09	down
LTK	739.407	273.641	0.370082	-1.38129	3.27468e-10	8.7947e-09	down
TRBV12-4	46.6969	10.9597	0.234699	-1.92318	3.36939e-10	9.03689e-09	down
TMEM273	417.52	191.939	0.459713	-1.09845	3.37297e-10	9.03894e-09	down
MIR4538	32.9625	9.37212	0.284326	-1.68842	3.49742e-10	9.33887e-09	down
CMTM2	727.634	47.2083	0.0648791	-3.00701	3.53343e-10	9.42178e-09	down
ANXA9	233.137	98.4049	0.42209	-1.21256	3.70699e-10	9.86005e-09	down
YJEFN3	145.987	58.7085	0.402149	-1.27704	3.88045e-10	1.02535e-08	down
TRBV6-4	10.4243	0.993411	0.0952976	-2.68288	3.98598e-10	1.04892e-08	down
PHOSPHO1	1624.19	212.834	0.13104	-2.50825	4.15566e-10	1.08823e-08	down
OR2I1P	5.92369	0.073432	0.0123963	-3.24778	4.48962e-10	1.16523e-08	down
MMP25	3749.42	354.805	0.0946294	-2.76234	4.56823e-10	1.18372e-08	down
WAS	5922.45	2698.83	0.455695	-1.10652	4.59255e-10	1.18907e-08	down
F2RL1	167.233	46.3208	0.276984	-1.73832	4.94523e-10	1.27116e-08	down
NOG	212.476	36.0526	0.169679	-2.27061	4.95206e-10	1.2719e-08	down
MIR4539	89.3079	23.092	0.258566	-1.8106	5.5388e-10	1.41132e-08	down
CLIP3	33.3332	15.2043	0.45613	-1.08028	6.32681e-10	1.59316e-08	down
MS4A3	125.313	17.7902	0.141966	-2.42615	6.35065e-10	1.59791e-08	down
RTL6	407.742	192.542	0.472216	-1.05796	6.47411e-10	1.62642e-08	down
LCN10	22.0913	5.23255	0.23686	-1.87212	6.73762e-10	1.68472e-08	down
SLC13A4	98.2576	43.4607	0.442314	-1.15457	6.92317e-10	1.72708e-08	down
MRM1	139.597	59.382	0.425382	-1.19882	7.1448e-10	1.77685e-08	down
CMTM1	43.121	9.9554	0.230871	-1.93467	7.3207e-10	1.81358e-08	down
TMEM184A	27.9377	9.30082	0.332913	-1.51951	7.94838e-10	1.95252e-08	down
SULT1B1	454.95	194.626	0.427796	-1.18931	8.22356e-10	2.00936e-08	down
CCDC114	45.1347	18.2634	0.404642	-1.26825	8.45855e-10	2.06208e-08	down
BTNL8	127.168	7.43003	0.0584266	-3.01629	9.77994e-10	2.35033e-08	down
GAL3ST4	194.72	92.4092	0.474574	-1.05665	1.01842e-09	2.43292e-08	down
AOC3	81.2441	14.847	0.182746	-2.17847	1.19099e-09	2.7994e-08	down
SNX32	55.2731	19.2445	0.348172	-1.46201	1.21414e-09	2.84963e-08	down
RNVU1-6	11.674	1.90853	0.163485	-2.22805	1.24167e-09	2.89732e-08	down
STX1B	38.4535	14.9869	0.389741	-1.2711	1.25964e-09	2.9265e-08	down
SLC16A13	86.3164	35.7662	0.414362	-1.22775	1.26091e-09	2.92733e-08	down
SYT2	27.2405	5.12245	0.188045	-2.12973	1.26281e-09	2.92963e-08	down
FRAT1	949.974	397.739	0.418684	-1.21664	1.30217e-09	3.01658e-08	down
ZNF775	98.6349	44.003	0.44612	-1.12815	1.38135e-09	3.18391e-08	down
NTRK1	44.7566	11.6078	0.259353	-1.81914	1.39564e-09	3.20539e-08	down
ZNF780B	257.703	123.499	0.479231	-1.0414	1.43992e-09	3.29297e-08	down
CUX2	28.4419	7.33616	0.257935	-1.7968	1.45735e-09	3.32571e-08	down
GPAT3	303.478	146.672	0.483305	-1.02341	1.60588e-09	3.64139e-08	down
FRAT2	1888.53	561.832	0.297497	-1.64462	1.69603e-09	3.82153e-08	down
PACSIN1	161.244	66.8788	0.414768	-1.22344	1.8122e-09	4.07187e-08	down
CD248	115.553	25.9979	0.224987	-1.9508	2.02067e-09	4.51503e-08	down
MGAM	925.401	104.426	0.112844	-2.59447	2.0224e-09	4.51576e-08	down
KIAA1324	267.518	73.9606	0.27647	-1.73077	2.16726e-09	4.78057e-08	down
HKDC1	65.7727	29.1865	0.443749	-1.1492	2.24301e-09	4.92619e-08	down
NECTIN1	299.581	99.4128	0.331839	-1.51384	2.40794e-09	5.24523e-08	down
PLEKHG3	1913	805.648	0.421144	-1.20844	2.43814e-09	5.30399e-08	down
IL5RA	39.2288	11.4071	0.290784	-1.70841	2.50655e-09	5.4344e-08	down
HSPA1L	90.4812	40.3983	0.446482	-1.13653	2.73674e-09	5.89767e-08	down
IER2	12809.1	3328.28	0.259838	-1.79964	2.74987e-09	5.92199e-08	down
TBX6	37.1289	16.7003	0.449794	-1.10695	2.78523e-09	5.99411e-08	down
RNF224	10.3535	2.41364	0.233124	-2.00884	2.89023e-09	6.1952e-08	down
IGF2R	6148.03	2761.82	0.449221	-1.12277	2.91305e-09	6.23994e-08	down
COL18A1	1471.3	407.543	0.276995	-1.72582	2.94931e-09	6.305e-08	down
CNTNAP3	134.846	6.3264	0.0469158	-3.05156	3.15373e-09	6.71521e-08	down
TTC9	542.96	261.322	0.481291	-1.03101	3.21462e-09	6.82677e-08	down
HGH1	368.467	171.811	0.466287	-1.07239	3.24941e-09	6.89154e-08	down
TMEM177	54.0829	25.5826	0.473025	-1.04892	3.38111e-09	7.15197e-08	down
TMIE	15.7455	4.47642	0.284298	-1.68938	3.45538e-09	7.27118e-08	down
AFF2	16.919	5.5299	0.326845	-1.58883	3.4964e-09	7.35077e-08	down
TNFSF14	245.863	85.6034	0.348175	-1.44953	3.61988e-09	7.56737e-08	down
STEAP4	777.627	154.422	0.198581	-2.08514	3.67328e-09	7.66403e-08	down
OLFM2	73.6954	28.6043	0.388142	-1.31615	3.70775e-09	7.71092e-08	down
ZBTB12	31.6371	13.8552	0.437943	-1.13704	3.8046e-09	7.8919e-08	down
RPS13P2	83.6261	33.9477	0.405946	-1.26035	3.83909e-09	7.95712e-08	down
MAP7	48.0913	15.3619	0.319432	-1.55505	3.93587e-09	8.13829e-08	down
KCTD21	122.792	60.1346	0.489728	-1.0128	4.24637e-09	8.74055e-08	down
ITGB8	20.7148	2.85567	0.137856	-2.4264	4.29109e-09	8.82695e-08	down
NLRP6	377.467	83.1699	0.220337	-1.97662	4.46901e-09	9.14027e-08	down
JRKL	127.941	60.2959	0.47128	-1.06127	4.48796e-09	9.16735e-08	down
PLEKHB1	358.502	158.79	0.442926	-1.1391	5.0659e-09	1.02124e-07	down
ST6GALNAC2	64.8449	16.2811	0.251078	-1.82312	5.07331e-09	1.02201e-07	down
MIR647	27.6312	11.2575	0.40742	-1.25687	5.08399e-09	1.02306e-07	down
ENPP3	33.9162	7.84339	0.231258	-1.93295	5.09156e-09	1.02376e-07	down
GPT	64.1803	21.9435	0.341905	-1.46555	5.33993e-09	1.06835e-07	down
ARHGEF4	57.9909	19.8817	0.342842	-1.45441	5.36073e-09	1.07185e-07	down
NHSL2	1012.68	440.238	0.434725	-1.16487	5.38416e-09	1.07586e-07	down
F8A3	30.0577	9.7313	0.323755	-1.53179	5.51093e-09	1.10051e-07	down
JAML	9562.96	3814.01	0.398831	-1.27648	6.28961e-09	1.23603e-07	down
SLC19A1	1044.89	297.53	0.284749	-1.68844	6.53217e-09	1.27995e-07	down
SPSB3	21.1662	7.47442	0.353131	-1.45434	6.69249e-09	1.30642e-07	down
KCNJ15	905.778	72.5703	0.0801194	-2.77989	6.81225e-09	1.32818e-07	down
GPC2	117.568	54.2483	0.461421	-1.08354	7.92737e-09	1.52615e-07	down
CASS4	248.195	96.6437	0.389385	-1.30811	8.79492e-09	1.67411e-07	down
PKDCC	5.12137	0.073432	0.0143384	-3.03669	9.07836e-09	1.72194e-07	down
PRSS35	4.05997	0.11808	0.029084	-2.94247	9.72625e-09	1.83508e-07	down
LEF1-AS1	47.9571	15.2035	0.317022	-1.55428	1.08053e-08	2.01034e-07	down
EHMT2-AS1	21.9303	7.50317	0.342137	-1.5062	1.19369e-08	2.20049e-07	down
KLHDC7A	6.66405	0.479978	0.0720249	-2.83365	1.26318e-08	2.31927e-07	down
ATP6V0E2-AS1	52.0997	19.519	0.374647	-1.34319	1.31488e-08	2.40595e-07	down
TRIM51BP	10.4336	0.710659	0.0681124	-2.78348	1.57898e-08	2.83748e-07	down
DRD4	36.3409	11.9832	0.329744	-1.52434	1.59418e-08	2.8632e-07	down
AJAP1	7.5361	1.05281	0.139702	-2.47296	1.64552e-08	2.94225e-07	down
SMIM10L2A	32.2943	10.2775	0.318243	-1.53271	1.69379e-08	3.02014e-07	down
ZFHX2-AS1	54.6442	22.3775	0.409513	-1.23011	1.78864e-08	3.17693e-07	down
KIT	25.6785	9.39435	0.365846	-1.40245	1.82338e-08	3.22438e-07	down
MGAM2	11.1722	0.900967	0.0806433	-2.72733	1.83325e-08	3.24005e-07	down
HSPG2	73.1935	27.147	0.370894	-1.34502	1.94843e-08	3.42105e-07	down
SLC9A3	56.341	19.8658	0.3526	-1.4327	1.97266e-08	3.45602e-07	down
BEST1	574.677	195.343	0.339919	-1.47234	2.14935e-08	3.73099e-07	down
TMEM250	1019.24	472.307	0.46339	-1.07859	2.16012e-08	3.74362e-07	down
BTG2	11678.2	3667.56	0.314052	-1.56603	2.26063e-08	3.89889e-07	down
COL6A2	1552.48	696.813	0.448839	-1.12047	2.31019e-08	3.96733e-07	down
BASP1	1985.83	505.911	0.25476	-1.80339	2.33154e-08	3.99972e-07	down
ITGB4	37.575	12.3299	0.32814	-1.50535	2.3849e-08	4.0782e-07	down
PLXDC1	446.527	209.526	0.469234	-1.06379	2.49827e-08	4.2427e-07	down
NFAM1	5495.89	2058.34	0.374524	-1.35145	2.52509e-08	4.28598e-07	down
PTGDR2	134.147	36.5204	0.272242	-1.73456	2.61311e-08	4.42603e-07	down
RPL41P5	89.2284	33.8901	0.379813	-1.33837	2.88131e-08	4.85726e-07	down
PPM1J	47.0953	21.9182	0.465401	-1.09163	2.93208e-08	4.93508e-07	down
CD3E	6896	3252.84	0.4717	-1.05386	3.17476e-08	5.29637e-07	down
MPZL1	551.253	212.63	0.385722	-1.31282	3.26397e-08	5.42829e-07	down
RAB36	45.985	13.188	0.28679	-1.6606	3.29827e-08	5.48249e-07	down
ASPRV1	98.7211	20.5092	0.207749	-2.00656	3.40846e-08	5.6394e-07	down
ADAMTS4	29.0643	13.5298	0.46551	-1.08143	3.61398e-08	5.95797e-07	down
PRSS53	95.6416	43.7668	0.457613	-1.10877	3.90102e-08	6.34927e-07	down
TRBV6-1	43.5435	15.568	0.357526	-1.39244	4.04276e-08	6.55719e-07	down
CSPG4P10	52.2464	20.0668	0.384079	-1.32671	4.18442e-08	6.75264e-07	down
ASIC1	45.5951	12.1453	0.266373	-1.74466	4.25573e-08	6.84731e-07	down
ZDHHC18	3655.1	1210.93	0.331299	-1.49858	4.38364e-08	7.04607e-07	down
FUT2	18.5152	7.45097	0.402425	-1.25913	4.40363e-08	7.07112e-07	down
NLGN2	187.732	91.0837	0.485179	-1.02314	4.41349e-08	7.07634e-07	down
OPRL1	313.933	136.738	0.435564	-1.15757	4.4767e-08	7.17411e-07	down
FOXRED2	56.702	27.0086	0.476325	-1.02948	4.62088e-08	7.38674e-07	down
TRPM6	79.9701	8.00659	0.10012	-2.57415	4.68167e-08	7.47277e-07	down
MNDA	7877.01	2476.15	0.314351	-1.56006	4.78125e-08	7.62036e-07	down
KIAA1614	31.2698	12.3731	0.395688	-1.27456	5.62911e-08	8.83149e-07	down
SLC4A10	143.027	43.5339	0.304374	-1.60165	5.70803e-08	8.93785e-07	down
KRT73-AS1	32.047	9.44137	0.29461	-1.62382	5.72462e-08	8.95946e-07	down
RORC	156.083	55.8967	0.358121	-1.40621	6.02438e-08	9.3757e-07	down
APOBR	5615.85	2222.22	0.395705	-1.27907	6.23688e-08	9.68102e-07	down
TRBV12-3	42.7181	15.6129	0.365485	-1.3715	6.33659e-08	9.79794e-07	down
MED25	2029.69	888.038	0.437524	-1.15051	6.66622e-08	1.02337e-06	down
CYP2D6	204.738	93.1675	0.455058	-1.10525	6.78419e-08	1.0395e-06	down
ALOX5AP	1572.24	667.374	0.424473	-1.18902	6.90655e-08	1.05515e-06	down
PDYN-AS1	15.1626	1.61826	0.106728	-2.52159	7.17414e-08	1.09144e-06	down
CYP4F35P	44.927	17.1686	0.382144	-1.35029	7.25871e-08	1.10326e-06	down
PEAK3	237.26	72.1385	0.304048	-1.59654	7.29424e-08	1.10763e-06	down
ZKSCAN7	59.8965	27.0815	0.452139	-1.11228	8.20667e-08	1.23565e-06	down
DM1-AS	9.29863	2.02904	0.218209	-1.90457	8.62556e-08	1.29327e-06	down
GPAT2P1	4.05091	0.145956	0.0360304	-2.74046	8.99816e-08	1.34225e-06	down
MBOAT7	4516.58	1206.94	0.267225	-1.73783	9.0591e-08	1.34883e-06	down
TIGD3	94.0913	24.2057	0.257257	-1.7741	9.27672e-08	1.37804e-06	down
BRSK2	27.8932	10.9574	0.392836	-1.27052	9.41462e-08	1.39401e-06	down
B3GNT8	221.069	64.0995	0.289953	-1.64471	9.70263e-08	1.43204e-06	down
TRAV22	11.2769	3.26506	0.289535	-1.6045	1.0319e-07	1.51643e-06	down
CSF2RB	4355.54	1518.39	0.34861	-1.43254	1.06571e-07	1.55931e-06	down
FPR2	890.272	168.179	0.188907	-2.07654	1.2497e-07	1.80711e-06	down
LRRN3	209.827	51.4138	0.245029	-1.82447	1.25053e-07	1.8075e-06	down
CEACAM1	143.107	41.7025	0.291407	-1.63509	1.28634e-07	1.85093e-06	down
MMP15	21.4637	6.66824	0.310676	-1.56068	1.34793e-07	1.92747e-06	down
LRRC26	10.4605	1.90501	0.182114	-2.12252	1.35573e-07	1.93519e-06	down
GPR25	69.3233	28.581	0.412286	-1.21525	1.3756e-07	1.96007e-06	down
SIGLEC5	40.7791	12.2055	0.299307	-1.59801	1.46334e-07	2.07222e-06	down
NOV	29.4906	3.58793	0.121664	-2.40113	1.55153e-07	2.18362e-06	down
S1PR4	2753.38	1166.87	0.423794	-1.18895	1.58287e-07	2.22481e-06	down
CEACAM3	550.515	83.5427	0.151754	-2.25363	1.62424e-07	2.27202e-06	down
RHEX	27.1712	6.53574	0.240539	-1.83316	1.93377e-07	2.6644e-06	down
ARAP3	1090.47	391.46	0.358984	-1.39398	1.93703e-07	2.66775e-06	down
ATP6V1G2	38.2795	16.914	0.441856	-1.11794	1.96197e-07	2.69767e-06	down
ORM1	28.7565	5.67819	0.197458	-2.0334	1.9921e-07	2.73305e-06	down
AOC2	103.602	26.1574	0.252479	-1.78584	2.04695e-07	2.79875e-06	down
PIANP	23.5803	9.77287	0.414451	-1.21979	2.06659e-07	2.8232e-06	down
RBFOX3	59.6029	26.4737	0.444169	-1.13417	2.09995e-07	2.86634e-06	down
CX3CR1	2678.87	988.567	0.369024	-1.3601	2.18405e-07	2.96476e-06	down
EPHB3	44.6871	14.7398	0.329844	-1.51412	2.35467e-07	3.16958e-06	down
DSC1	19.9309	3.17341	0.159221	-2.22033	2.37171e-07	3.18984e-06	down
ALG1L13P	16.2695	5.03609	0.309542	-1.53543	2.37769e-07	3.19388e-06	down
PRR33	1210.99	468.959	0.387252	-1.29975	2.46835e-07	3.30737e-06	down
MOB3A	5307.86	2490.49	0.469208	-1.05633	2.48437e-07	3.32744e-06	down
GPR27	212.098	73.1492	0.344883	-1.43827	2.60341e-07	3.47673e-06	down
DACT3-AS1	11.5106	3.70399	0.32179	-1.54483	2.71407e-07	3.60951e-06	down
PARS2	24.6767	10.3036	0.417545	-1.21214	2.78109e-07	3.68949e-06	down
FAM86C2P	13.3168	4.72102	0.354515	-1.42927	2.96306e-07	3.8987e-06	down
PEX11A	28.1343	13.5001	0.479844	-1.02057	3.17499e-07	4.14529e-06	down
LGALS9C	99.4289	31.1194	0.312982	-1.54927	3.46528e-07	4.48602e-06	down
AVIL	124.653	55.8668	0.448178	-1.11808	3.5107e-07	4.53933e-06	down
FAM156B	11.9441	4.04633	0.338773	-1.5257	3.56302e-07	4.60328e-06	down
CD200R1	120.661	57.5358	0.47684	-1.03789	3.73111e-07	4.80498e-06	down
TCAP	138.892	66.277	0.477182	-1.03579	3.77909e-07	4.84928e-06	down
SH3RF3	82.4281	38.7384	0.469965	-1.04989	3.7944e-07	4.86504e-06	down
ZNF296	360.129	168.903	0.469007	-1.05547	3.96672e-07	5.05572e-06	down
FFAR2	2611.79	319.108	0.12218	-2.37352	4.05866e-07	5.15653e-06	down
GHRL	75.0344	24.8986	0.331829	-1.48271	4.13378e-07	5.24575e-06	down
PI3	282.899	11.6164	0.041062	-2.77653	4.15295e-07	5.26593e-06	down
NHLRC4	41.1025	16.9194	0.411639	-1.20219	4.39946e-07	5.54031e-06	down
BNIPL	34.7019	15.1457	0.436451	-1.12164	4.66643e-07	5.85234e-06	down
CA8	24.3102	6.95385	0.286046	-1.63843	4.70037e-07	5.89031e-06	down
KRT81	13.0809	2.75303	0.210462	-1.90634	4.76244e-07	5.96344e-06	down
EGR3	617.376	105.606	0.171056	-2.12927	4.91995e-07	6.13438e-06	down
CLDN23	29.2506	11.4542	0.391588	-1.27221	5.052e-07	6.28439e-06	down
XCR1	15.0626	4.67915	0.310647	-1.51826	5.19436e-07	6.449e-06	down
ZNF658	42.064	18.4301	0.438144	-1.13864	5.21628e-07	6.46621e-06	down
RAB3D	661.367	284.088	0.429547	-1.16656	6.14495e-07	7.50165e-06	down
KLHL34	8.18918	2.3726	0.289723	-1.70162	6.4165e-07	7.7976e-06	down
FUT7	334.351	117.929	0.35271	-1.40655	6.59138e-07	7.98897e-06	down
FCER1A	424.175	127.883	0.301486	-1.58717	6.82716e-07	8.24055e-06	down
CEACAM4	360.692	140.725	0.390152	-1.28519	7.01844e-07	8.45237e-06	down
KLK14	15.2264	4.97694	0.326862	-1.49364	7.5036e-07	8.97611e-06	down
KIAA1257	42.6283	9.79558	0.22979	-1.85749	7.68854e-07	9.16662e-06	down
GDPD3	312.793	130.636	0.417645	-1.20295	8.05724e-07	9.54165e-06	down
RTN4R	38.3372	17.6638	0.46075	-1.09255	8.20384e-07	9.68753e-06	down
KCNA5	5.38593	0.945805	0.175607	-2.08333	8.21536e-07	9.69757e-06	down
TEX101	5.87321	0.389946	0.0663941	-2.53892	8.25016e-07	9.72436e-06	down
CNTNAP3C	18.4862	0.502402	0.0271771	-2.75182	8.65814e-07	1.01457e-05	down
NADK	5327.74	2591.49	0.486414	-1.00612	8.78721e-07	1.02857e-05	down
VNN2	2563.21	855.675	0.33383	-1.46749	1.00883e-06	1.16307e-05	down
NFE4	50.6833	5.34006	0.105362	-2.41368	1.0295e-06	1.18477e-05	down
MMP9	683.989	59.5356	0.0870417	-2.49983	1.0506e-06	1.20776e-05	down
CYP4F12	21.6775	4.75291	0.219256	-1.89739	1.05702e-06	1.21341e-05	down
C2orf40	12.4989	4.23007	0.338436	-1.45142	1.0773e-06	1.23536e-05	down
TGM3	36.2429	1.94627	0.0537008	-2.6441	1.08266e-06	1.23974e-05	down
AIRE	27.4845	10.2608	0.37333	-1.32468	1.11356e-06	1.27149e-05	down
CLEC4C	39.3916	12.1017	0.307214	-1.5631	1.16167e-06	1.31846e-05	down
AEBP1	347.597	169.212	0.486804	-1.00343	1.21646e-06	1.37482e-05	down
ADAMTSL4	1267.71	607.88	0.479511	-1.02398	1.22115e-06	1.37963e-05	down
FOS	34824.9	13761.7	0.395168	-1.26691	1.3001e-06	1.4601e-05	down
GIMAP8	1018.22	481.873	0.473249	-1.04122	1.35921e-06	1.51589e-05	down
TLR8	854.701	374.306	0.437938	-1.13932	1.39844e-06	1.55532e-05	down
COL5A1	18.0559	5.96887	0.330577	-1.4966	1.42878e-06	1.58468e-05	down
SNX15	51.8502	21.6122	0.416819	-1.20242	1.47593e-06	1.6291e-05	down
EGR2	426.316	113.376	0.265943	-1.70824	1.47841e-06	1.63127e-05	down
AATK	822.355	247.835	0.301372	-1.57685	1.50174e-06	1.65475e-05	down
PNMT	19.2196	6.40922	0.333473	-1.46398	1.64096e-06	1.78549e-05	down
PTGS2	3660.68	498.971	0.136305	-2.24864	1.6741e-06	1.81786e-05	down
ATG16L2	9738.33	4631.73	0.475618	-1.03341	1.72414e-06	1.86841e-05	down
GNG12-AS1	7.63707	1.5355	0.201059	-1.92669	1.73946e-06	1.88057e-05	down
FOLR3	507.77	101.662	0.200214	-1.96744	1.74579e-06	1.88655e-05	down
NECAB2	45.8385	4.62181	0.100828	-2.40288	1.75336e-06	1.89305e-05	down
CYSRT1	15.721	5.30103	0.337195	-1.4555	1.7686e-06	1.90791e-05	down
SPINT1	392.872	189.828	0.483181	-1.01191	1.85702e-06	1.99158e-05	down
C9orf139	416.497	192.979	0.463337	-1.06686	1.91992e-06	2.0522e-05	down
ARHGAP27P2	20.4738	8.01008	0.391235	-1.26116	1.93165e-06	2.06267e-05	down
ATP8A2	26.4486	9.81279	0.371013	-1.36074	2.11221e-06	2.23174e-05	down
KCNJ2	128.648	26.668	0.207294	-1.93209	2.11496e-06	2.23322e-05	down
RASA4B	12.6944	4.7265	0.37233	-1.35882	2.12371e-06	2.24022e-05	down
CKLF	65.0657	25.6476	0.39418	-1.2671	2.14358e-06	2.25895e-05	down
DNTT	2.67591	0.073432	0.0274419	-2.46625	2.14777e-06	2.26114e-05	down
SPINK2	16.7503	6.17826	0.368845	-1.34704	2.21194e-06	2.31882e-05	down
ACY1	7.94457	2.35581	0.296532	-1.71739	2.2572e-06	2.36164e-05	down
PLPPR2	1663.13	790.103	0.47507	-1.03374	2.47014e-06	2.56191e-05	down
TNFRSF1A	2713.25	1322.01	0.487244	-1.00099	2.50634e-06	2.59695e-05	down
TSPEAR	8.29898	0.670006	0.0807335	-2.40886	2.6359e-06	2.71424e-05	down
PADI2	899.418	275.222	0.306	-1.55293	2.65693e-06	2.73183e-05	down
TRAJ1	19.4133	7.57249	0.390068	-1.26978	2.75242e-06	2.82099e-05	down
ZNF835	21.8912	8.16709	0.373076	-1.369	2.94535e-06	2.99485e-05	down
SVIL2P	16.9073	7.92624	0.468805	-1.02418	2.96483e-06	3.00989e-05	down
IL1RL1	14.6207	3.39062	0.231905	-1.79804	2.99319e-06	3.0358e-05	down
MIR9-3HG	110.197	47.3404	0.429598	-1.16408	3.00462e-06	3.04476e-05	down
GLIS2	19.7807	8.70924	0.440291	-1.11845	3.04382e-06	3.08229e-05	down
FAM83F	10.1916	1.891	0.185544	-1.99188	3.07929e-06	3.1133e-05	down
TRAV1-2	35.0749	12.9918	0.370402	-1.34476	3.14217e-06	3.17089e-05	down
SLX1B-SULT1A4	8.54522	2.1297	0.249227	-1.71856	3.14622e-06	3.17397e-05	down
SLC4A3	86.9036	37.6777	0.433557	-1.16263	3.17954e-06	3.20457e-05	down
KANK3	80.0976	37.1129	0.463346	-1.07357	3.31595e-06	3.32537e-05	down
APBA1	21.249	7.69287	0.362035	-1.3785	3.42504e-06	3.42631e-05	down
KCNJ2-AS1	17.5673	3.56309	0.202825	-1.94861	3.42839e-06	3.42743e-05	down
KCNH2	63.4598	28.0106	0.441391	-1.12468	3.45524e-06	3.4532e-05	down
REG4	18.9447	4.79505	0.253107	-1.72409	3.48666e-06	3.48135e-05	down
RTN4RL1	8.58888	2.68323	0.312408	-1.51186	3.51827e-06	3.50855e-05	down
CCR2	972.475	434.066	0.446352	-1.11089	3.61683e-06	3.59679e-05	down
EEF1AKMT3	50.1475	24.6312	0.491175	-1.00437	3.64239e-06	3.62009e-05	down
S100P	545.166	63.201	0.11593	-2.29593	3.99944e-06	3.93346e-05	down
ADAMTS5	35.1044	7.25442	0.206653	-1.91502	4.04759e-06	3.9723e-05	down
SLC46A2	184.221	74.138	0.40244	-1.23772	4.15273e-06	4.06679e-05	down
FAM129A	1882.49	886.495	0.470915	-1.0429	4.22815e-06	4.13413e-05	down
PGLYRP1	232.83	34.5295	0.148304	-2.15049	4.68774e-06	4.52046e-05	down
MPZL2	87.5954	40.3836	0.461025	-1.07408	4.69835e-06	4.52662e-05	down
DLX4	21.2916	10.3854	0.487768	-1.00905	5.15836e-06	4.91674e-05	down
HCG27	223.567	95.8859	0.428892	-1.15753	5.18729e-06	4.93845e-05	down
SLC16A3	2614.49	1159.73	0.443576	-1.11695	5.69067e-06	5.34797e-05	down
ATAD3C	28.3841	11.3949	0.401454	-1.20393	5.944e-06	5.56002e-05	down
AOC1	11.4146	0.291003	0.025494	-2.56353	5.98134e-06	5.58844e-05	down
SCARA5	7.5056	1.47476	0.196489	-1.95876	6.12429e-06	5.71084e-05	down
DHX34	1223.58	580.191	0.474175	-1.03246	6.1768e-06	5.75169e-05	down
NSG1	281.149	136.532	0.485622	-1.00034	6.20479e-06	5.77204e-05	down
CALHM1	5.183	1.20842	0.233151	-1.79512	6.22559e-06	5.78804e-05	down
CSNK1A1L	6.9385	0.491042	0.0707707	-2.42168	6.25613e-06	5.80971e-05	down
PRSS22	18.2151	5.42191	0.297661	-1.60651	6.35792e-06	5.89401e-05	down
HSPA6	1418.92	328.578	0.231569	-1.80991	6.38256e-06	5.91514e-05	down
TRBV3-1	39.1532	16.9695	0.433413	-1.1393	6.388e-06	5.91848e-05	down
SLC45A4	918.973	328.568	0.357538	-1.37185	6.87761e-06	6.33012e-05	down
ARHGEF40	1463.17	678.53	0.463739	-1.06023	7.05017e-06	6.4704e-05	down
NCF4-AS1	9.98425	2.22312	0.222663	-1.83909	7.20964e-06	6.60544e-05	down
MEF2B	26.4922	10.7521	0.405861	-1.21912	7.29252e-06	6.66807e-05	down
EFNA3	19.1347	7.56196	0.395197	-1.27117	7.30699e-06	6.67685e-05	down
DHRS9	161.986	44.5471	0.275005	-1.64471	7.59902e-06	6.91683e-05	down
WDR86-AS1	88.4183	42.2882	0.478274	-1.01489	7.73538e-06	7.03099e-05	down
VASH1-AS1	21.6613	9.249	0.426983	-1.13407	7.82881e-06	7.10787e-05	down
ADAMTSL2	7.88185	1.61869	0.205369	-1.88497	7.85273e-06	7.12757e-05	down
MYBPH	13.9296	1.56587	0.112413	-2.25751	7.94771e-06	7.2036e-05	down
NRP1	54.8171	21.749	0.396757	-1.24657	8.10354e-06	7.32007e-05	down
RHOXF1P2	5.43433	0.626862	0.115352	-2.21901	8.2127e-06	7.40826e-05	down
MIR5684	4.31558	0.330286	0.0765335	-2.33255	8.39354e-06	7.55654e-05	down
PRSS30P	130.379	52.1674	0.400122	-1.24411	8.5837e-06	7.71477e-05	down
CMKLR1	523.154	231.39	0.442298	-1.11876	8.65566e-06	7.77292e-05	down
SLC12A3	20.1977	8.19691	0.405833	-1.24382	8.82271e-06	7.90967e-05	down
IFIT2	1446.61	355.141	0.245499	-1.74999	8.87563e-06	7.94603e-05	down
SNORD83A	22.7248	8.72905	0.384121	-1.25729	8.92951e-06	7.99203e-05	down
TPSAB1	7.71163	0.578307	0.0749915	-2.3825	8.97123e-06	8.02267e-05	down
TRAV26-2	5.61359	1.4986	0.26696	-1.71537	9.35312e-06	8.3271e-05	down
KLLN	14.7512	5.67638	0.384808	-1.28324	9.41898e-06	8.37414e-05	down
SLC45A1	17.3191	8.59142	0.496067	-1.01764	9.42809e-06	8.37848e-05	down
HLA-J	32.5098	14.5209	0.446662	-1.09769	9.79443e-06	8.65763e-05	down
AS3MT	7.08013	1.74651	0.246678	-1.73645	1.00723e-05	8.86236e-05	down
G0S2	9006.14	1184.62	0.131534	-2.18066	1.04987e-05	9.20171e-05	down
PNMA3	245.497	113.841	0.463718	-1.05778	1.09905e-05	9.5935e-05	down
TRAV12-2	37.2215	13.4202	0.360549	-1.34181	1.11824e-05	9.74242e-05	down
LRG1	686.473	125.025	0.182126	-1.98038	1.14904e-05	9.97296e-05	down
MIR4530	11.9885	2.58811	0.215883	-1.86857	1.15039e-05	9.97385e-05	down
HPGDS	7.37897	2.19027	0.296826	-1.5919	1.16899e-05	0.00010116	down
KCNB1	10.9093	2.42108	0.221928	-1.85527	1.17171e-05	0.000101314	down
KIAA1211L	24.762	8.55774	0.345599	-1.39556	1.17499e-05	0.00010157	down
FLRT1	6.96114	1.7417	0.250204	-1.68647	1.18927e-05	0.000102694	down
TRGVA	11.1915	4.14089	0.370002	-1.35167	1.19267e-05	0.000102932	down
ADGRG3	853.3	140.096	0.164181	-2.04795	1.19587e-05	0.000103181	down
NPAS2	34.9201	15.1713	0.434458	-1.13273	1.25184e-05	0.000107347	down
ADORA1	9.34831	2.20189	0.235539	-1.74666	1.26796e-05	0.000108671	down
CPT1B	61.0773	23.5655	0.385831	-1.28123	1.35752e-05	0.000115576	down
DGKK	25.7861	8.83634	0.342679	-1.4343	1.38988e-05	0.00011805	down
ARVCF	283.941	132.333	0.466058	-1.05154	1.43289e-05	0.000121222	down
CLDN9	72.7003	16.172	0.222447	-1.82016	1.43717e-05	0.000121552	down
SEZ6L	59.236	28.2095	0.476222	-1.03667	1.51612e-05	0.000126926	down
MADCAM1	31.2074	12.3515	0.395788	-1.25953	1.53566e-05	0.000128362	down
TRAV12-3	28.8371	12.1453	0.42117	-1.16101	1.584e-05	0.000132025	down
KY	63.4205	5.53365	0.0872533	-2.31145	1.59354e-05	0.000132751	down
LIMD1-AS1	9.22609	3.47627	0.376787	-1.34252	1.59698e-05	0.000132969	down
TSC22D1-AS1	16.9845	7.27703	0.42845	-1.15932	1.64356e-05	0.000136352	down
ZNF662	35.7384	14.5646	0.407534	-1.2194	1.64564e-05	0.000136489	down
RASGRP4	2469.82	1110.38	0.449582	-1.09468	1.65452e-05	0.000137049	down
BMP8A	22.2536	10.1903	0.457915	-1.08915	1.68579e-05	0.00013928	down
GEMIN7-AS1	36.3533	16.3637	0.45013	-1.09099	1.71774e-05	0.00014152	down
RNA5SP449	6.35778	1.59695	0.251181	-1.7388	1.79333e-05	0.000147068	down
FBLN5	75.0489	31.3033	0.417105	-1.18633	1.93097e-05	0.000157153	down
SLPI	108.218	16.4654	0.15215	-2.06767	1.94189e-05	0.000157842	down
SNHG28	32.1243	12.7176	0.395887	-1.25573	2.00068e-05	0.000162169	down
DUSP1	35225.5	15900	0.451379	-1.08865	2.02294e-05	0.000163643	down
CYP4F3	630.789	91.2917	0.144726	-2.09429	2.03759e-05	0.000164497	down
BAIAP3	636.669	290.565	0.456383	-1.07508	2.0598e-05	0.000165915	down
IER3	2038.75	630.631	0.309323	-1.51254	2.06665e-05	0.000166342	down
CKLF-CMTM1	5.35039	1.24795	0.233244	-1.78198	2.21457e-05	0.000176522	down
MIR3677	5.48077	1.46166	0.266689	-1.6678	2.23089e-05	0.00017756	down
RIMBP3B	4.70579	1.02986	0.21885	-1.74354	2.2905e-05	0.000181584	down
ABHD12B	22.5375	7.99497	0.354741	-1.37395	2.34151e-05	0.000185308	down
MIR425	2.75587	0.201521	0.0731245	-2.23108	2.42172e-05	0.000191138	down
MIR3176	19.9048	6.007	0.301787	-1.53577	2.53349e-05	0.0001987	down
MIR1250	3.23899	0.343982	0.1062	-2.14756	2.5736e-05	0.000201345	down
TRAV8-4	29.4698	11.9809	0.40655	-1.2051	2.65995e-05	0.000207193	down
CEBPE	62.8179	26.2953	0.418596	-1.17427	2.6821e-05	0.000208715	down
LUNAR1	8.59524	2.0917	0.243356	-1.70626	2.69023e-05	0.000209146	down
OR52K1	13.0565	3.91164	0.299594	-1.53882	2.71074e-05	0.000210587	down
TSPAN16	24.6761	7.6802	0.31124	-1.5109	2.75314e-05	0.000213623	down
TMEM252	4.53306	0.406999	0.0897846	-2.20591	2.83004e-05	0.000219219	down
PTPRS	143.778	65.0088	0.452148	-1.08917	2.91403e-05	0.000225236	down
TIFAB	22.7812	9.51977	0.417879	-1.16518	3.04418e-05	0.000234113	down
ENTPD2	14.1478	2.03999	0.144191	-2.05464	3.12056e-05	0.0002393	down
CELA1	15.2817	5.37734	0.351881	-1.37835	3.17664e-05	0.000243138	down
TRAPPC12-AS1	37.8195	16.8294	0.444993	-1.10774	3.17666e-05	0.000243138	down
RPL35P1	17.5781	8.56859	0.487459	-1.00846	3.30472e-05	0.000252099	down
PRR36	8.23215	2.38651	0.289901	-1.55049	3.36386e-05	0.000256072	down
EYA2	6.49695	1.44979	0.223149	-1.78932	3.50778e-05	0.000265822	down
DPEP3	105.198	35.671	0.339084	-1.40769	3.61409e-05	0.000273105	down
TRBJ1-5	67.9484	31.7589	0.467397	-1.03574	3.76405e-05	0.00028251	down
TRBV6-6	29.1811	12.0494	0.412919	-1.17251	3.84844e-05	0.000288305	down
SOWAHD	129.725	61.6223	0.475024	-1.01914	3.88411e-05	0.000290774	down
PRRT1	35.7921	15.6534	0.437341	-1.13843	4.19296e-05	0.000311356	down
CSPG4	6.98808	2.13664	0.305755	-1.51045	4.20372e-05	0.000311939	down
PCBP3	35.4166	14.57	0.411389	-1.1878	4.20727e-05	0.000312131	down
CACNA1C-AS1	28.197	13.5921	0.482042	-1.00837	4.44273e-05	0.000326918	down
FAM86B1	7.48852	2.50843	0.33497	-1.43588	4.50459e-05	0.000330903	down
PPFIA4	94.5213	35.5807	0.376431	-1.29452	4.53456e-05	0.000332648	down
SLC34A3	12.2012	5.59077	0.458214	-1.05807	4.57175e-05	0.000335147	down
SNORD3B-1	37.1913	10.2337	0.275164	-1.61433	4.66057e-05	0.00034088	down
CLEC9A	24.3468	7.10894	0.291986	-1.55207	4.76412e-05	0.000347111	down
SCT	29.4504	12.5344	0.425609	-1.17306	4.79491e-05	0.000348903	down
MAPK15	7.01392	1.57251	0.224199	-1.78919	4.81252e-05	0.000350003	down
LILRB3	2687.29	1259.5	0.468687	-1.03722	4.88333e-05	0.000354831	down
MCF2L-AS1	10.0555	4.01973	0.399755	-1.17085	4.89998e-05	0.00035596	down
KCNH7	9.04123	1.94581	0.215215	-1.81785	5.01215e-05	0.000363206	down
SLC12A1	65.5935	4.31073	0.0657189	-2.26552	5.09694e-05	0.000368685	down
HECW2	30.936	11.3072	0.365504	-1.32502	5.20236e-05	0.000375465	down
MRVI1	235.475	102.722	0.436233	-1.12379	5.24963e-05	0.000378707	down
CXCL6	8.52766	1.20655	0.141486	-2.03407	5.39892e-05	0.000387909	down
UFSP1	14.899	6.04516	0.405742	-1.21321	5.45078e-05	0.000390935	down
MAPT	13.5739	5.65657	0.416726	-1.16332	5.82989e-05	0.000415252	down
DAPK2	344.403	135.297	0.392844	-1.2411	6.65694e-05	0.000466305	down
ARPC4-TTLL3	6.58986	2.1791	0.330674	-1.46768	6.89718e-05	0.000481559	down
TRAV9-2	17.971	7.76033	0.431826	-1.11526	7.50904e-05	0.000519159	down
TRBV4-1	43.1657	18.5398	0.429502	-1.12229	7.56361e-05	0.000522274	down
POM121L4P	3.27455	0.530303	0.161947	-1.91476	7.64975e-05	0.000527003	down
STX3	1155.78	496.19	0.429312	-1.13836	7.92135e-05	0.000543152	down
RXFP2	25.6843	10.8863	0.423851	-1.14391	8.00447e-05	0.000548303	down
IGSF23	4.00236	0.433997	0.108435	-2.10635	8.05609e-05	0.000551567	down
PKMP3	10.4458	3.88164	0.371597	-1.29706	8.10299e-05	0.000554587	down
MFSD6L	17.6925	6.74101	0.381009	-1.27798	8.26963e-05	0.000564503	down
MORC2-AS1	4.13211	0.836099	0.202342	-1.8148	8.30047e-05	0.000566487	down
RBAKDN	6.5296	1.83297	0.280717	-1.57346	8.57312e-05	0.000582744	down
PTAFR	2765.98	1307.57	0.472734	-1.02272	8.85501e-05	0.000599495	down
SIRPB2	635.713	294.082	0.462602	-1.04866	9.16184e-05	0.000618176	down
GAS1	14.4491	4.84083	0.335026	-1.39214	9.50979e-05	0.000638844	down
C14orf132	22.605	8.8194	0.390152	-1.28266	9.78881e-05	0.000655942	down
PPL	46.0747	9.45102	0.205124	-1.80569	9.89059e-05	0.000662348	down
SLC22A20P	11.4101	4.65732	0.408176	-1.15996	9.9152e-05	0.000663581	down
IFITM2	14706.3	4580.19	0.311445	-1.47285	0.000108404	0.000718322	down
CLEC5A	123.517	50.653	0.41009	-1.18164	0.000109253	0.000723645	down
KRT5	30.615	8.80509	0.287608	-1.55058	0.000113694	0.000749352	down
CD34	14.4973	5.34312	0.36856	-1.33709	0.000115307	0.000759363	down
IL23R	5.73476	1.58036	0.275576	-1.64103	0.000119213	0.000781562	down
GNG10	5.0504	1.05888	0.209663	-1.74295	0.000122304	0.000799215	down
RPL21P39	2.82552	0.200016	0.0707891	-2.10158	0.000127845	0.000829856	down
ESPNL	17.1075	7.23403	0.422857	-1.14928	0.000130673	0.000846845	down
BOK	73.5617	27.1938	0.369674	-1.3017	0.000131517	0.000851798	down
CCNJL	252.142	82.9986	0.329174	-1.41614	0.000133912	0.000864579	down
SMOC1	4.28086	1.02465	0.239357	-1.71778	0.000135073	0.000870968	down
IL17RE	48.1986	22.663	0.470201	-1.02647	0.000137533	0.000885054	down
RPL7AP64	51.7832	22.4807	0.434132	-1.12054	0.000139109	0.000894303	down
TSPAN10	7.81412	2.36485	0.302639	-1.45065	0.000141536	0.000908631	down
CSF3R	25766.2	10196.3	0.395723	-1.22405	0.000141629	0.000909049	down
PTPRN2	225.989	106.137	0.469655	-1.02667	0.000142485	0.000913812	down
FAM157A	448.542	163.753	0.365077	-1.31018	0.000144598	0.000926064	down
LEP	3.09246	0.170821	0.0552378	-2.1107	0.000146904	0.000938589	down
HAL	429.51	197.067	0.458817	-1.054	0.000150476	0.000958174	down
MMP23B	104.663	49.6068	0.473966	-1.02377	0.000153186	0.000973696	down
FZD8	11.2769	4.22167	0.374364	-1.27766	0.000153643	0.000976406	down
PRAP1	12.7747	6.12386	0.479372	-1.01466	0.000156293	0.000990115	down
PRRT2	36.0157	17.7353	0.492431	-0.999069	6.29143e-05	0.000443798	down
RNA5SP283	28.5323	13.5772	0.475853	-0.998935	1.09225e-05	9.53674e-05	down
MID1IP1	1899.37	931.323	0.490333	-0.996796	5.11788e-07	6.36142e-06	down
CNN2	7844.88	3884.61	0.495178	-0.995115	1.86443e-10	5.29852e-09	down
THEM6	229.123	113.12	0.493707	-0.992253	3.67712e-09	7.66708e-08	down
TIGD5	214.119	105.891	0.494543	-0.992171	2.71924e-09	5.8655e-08	down
ROBO3	194.9	96.7631	0.496477	-0.990929	2.00302e-10	5.6654e-09	down
PCYOX1	318.404	158.895	0.499036	-0.990129	1.69613e-13	1.05006e-11	down
ZNF580	924.565	461.877	0.499561	-0.989641	7.62885e-15	6.33391e-13	down
C9orf64	115.664	56.8815	0.491781	-0.989328	3.48807e-06	3.48167e-05	down
STAG3L5P	328.535	163.462	0.497549	-0.989079	2.063e-09	4.6032e-08	down
SNAI3-AS1	80.5658	39.4062	0.489118	-0.988304	3.61572e-07	4.66573e-06	down
CBFA2T3	982.943	490.474	0.498985	-0.986204	2.87142e-11	1.00284e-09	down
MC1R	163.316	80.5208	0.493035	-0.986005	2.53399e-06	2.6239e-05	down
ZMYND10	113.191	56.4489	0.498706	-0.982741	1.48511e-06	1.63755e-05	down
IL2RB	4090.16	2037.34	0.498107	-0.980491	5.25e-08	8.29339e-07	down
TLR10	227.964	112.827	0.494934	-0.978829	1.1693e-05	0.00010116	down
ALDH1A1	533.791	261.504	0.4899	-0.977539	9.62205e-05	0.000645576	down
NKD1	72.753	35.7336	0.491164	-0.977044	4.43113e-06	4.30097e-05	down
ZNF486	110.632	55.0208	0.497332	-0.976098	1.57623e-07	2.21644e-06	down
TRBV5-4	53.6278	26.7432	0.498681	-0.97511	7.30836e-06	6.67685e-05	down
TSHZ3	185.185	92.4839	0.499413	-0.975083	1.07134e-06	1.2294e-05	down
SAPCD1	28.737	14.2584	0.49617	-0.965654	0.000100861	0.000673198	down
NOS3	50.839	25.3151	0.497946	-0.963796	1.17819e-07	1.70832e-06	down
EEPD1	327.355	162.677	0.496944	-0.962756	6.02109e-05	0.000426413	down
ZBTB47	167.736	83.7565	0.499335	-0.962712	1.52904e-05	0.000127875	down
S100A1	27.0525	13.3537	0.49362	-0.959894	0.000131941	0.000854031	down
NRSN2-AS1	10.4457	21.0168	2.01199	0.936548	9.47479e-05	0.000637159	up
PKP2	22.3043	44.8569	2.01113	0.953529	0.000136377	0.000878495	up
YES1	91.7733	184.147	2.00654	0.960344	4.22609e-05	0.000313382	up
CDKN2B-AS1	8.84079	17.8433	2.0183	0.966175	1.80961e-05	0.000148215	up
TAF4B	96.0051	192.255	2.00254	0.969224	2.74074e-06	2.80991e-05	up
ARRDC3-AS1	19.6737	39.4474	2.00509	0.973607	1.35022e-07	1.92988e-06	up
BACH1	1145.33	2304.47	2.01206	0.973696	4.60982e-06	4.45602e-05	up
TRAF6	240.528	481.975	2.00382	0.974324	3.77263e-07	4.84485e-06	up
DNAH10OS	43.8456	89.4209	2.03945	0.976574	4.44257e-05	0.000326918	up
PHLDA1	59.6172	120.997	2.02957	0.978378	4.7561e-05	0.000346762	up
KLF10	1362.38	2753.23	2.02091	0.97906	5.01494e-06	4.79569e-05	up
RNF19A	1002.98	2013.06	2.00708	0.979574	7.36909e-08	1.11792e-06	up
SLC35G1	40.7805	84.1857	2.06436	0.980961	0.000112409	0.00074241	up
ACTR3B	132.817	268.828	2.02405	0.98103	1.96392e-06	2.09226e-05	up
TANC1	6.79172	14.1837	2.08838	0.982883	0.000145832	0.000932856	up
ZBTB26	130.302	262.997	2.01836	0.983157	2.43878e-07	3.27046e-06	up
STOM	1434.41	2869.9	2.00075	0.983548	3.15543e-11	1.08941e-09	up
PPIAP40	17.4936	35.5017	2.02941	0.985612	3.84073e-06	3.79596e-05	up
RORA	1388.52	2831.75	2.0394	0.986617	1.55638e-05	0.000129966	up
UBL4A	693.86	1411.4	2.03412	0.987428	4.46242e-06	4.32525e-05	up
RB1CC1	596.031	1201.49	2.01583	0.989724	2.2996e-09	5.02984e-08	up
CIP2A	38.4992	77.8036	2.02092	0.990505	1.8829e-07	2.60324e-06	up
AHCTF1	688.564	1387.34	2.01483	0.990522	7.65381e-10	1.88882e-08	up
RPL24P4	136.075	275.567	2.02511	0.99143	6.49855e-08	1.00146e-06	up
SC5D	129.231	264.208	2.04446	0.991614	8.815e-06	7.90717e-05	up
CYCS	749.787	1503.96	2.00585	0.992197	1.16927e-14	9.32256e-13	up
KIF2A	750.184	1524.76	2.03251	0.992941	3.30851e-07	4.3004e-06	up
THAP9-AS1	640.386	1304.69	2.03735	0.993992	1.0848e-06	1.24174e-05	up
STAP1	158.868	324.321	2.04145	0.99429	3.37937e-06	3.3858e-05	up
CHN1	19.7094	40.9796	2.07919	0.994389	0.000110863	0.000733421	up
HMGB1P31	5.85771	12.4585	2.12685	0.99521	7.20023e-05	0.000500326	up
NUTM2A-AS1	206.969	419.71	2.02789	0.995407	2.17418e-09	4.7914e-08	up
MED21	179.462	366.662	2.04312	0.995759	1.94021e-06	2.06906e-05	up
CD27-AS1	247.529	505.431	2.0419	0.996537	7.20171e-07	8.64717e-06	up
FBXO36	8.69625	17.7895	2.04565	0.997149	2.44747e-05	0.000192933	up
HSPA13	226.253	461.916	2.04159	0.997463	8.46018e-07	9.94272e-06	up
KIF11	63.1963	129.686	2.05212	0.997717	2.92496e-05	0.000225918	up
RPS7P3	13.2028	27.6612	2.09511	0.998636	1.7909e-05	0.000146907	up
FAM208B	508.644	1034.7	2.03424	0.998692	2.99117e-08	5.02664e-07	up
NDC80	57.13	116.633	2.04154	0.99872	4.43201e-06	4.30097e-05	up
PELI1	1467.73	3008.15	2.04952	0.999252	2.67083e-06	2.74262e-05	up
RICTOR	1246.39	2537.84	2.03615	0.999389	5.75657e-08	9.00508e-07	up
ANKRD33B	111.904	230.137	2.05657	0.999542	2.67273e-06	2.74368e-05	up
XPNPEP1	818.514	1794.54	2.19243	1.12521	4.54268e-40	3.64902e-36	up
GADD45A	204.347	513.701	2.51387	1.32023	7.19388e-37	3.85244e-33	up
CGRRF1	127.851	330.579	2.58567	1.35708	1.64332e-33	5.86684e-30	up
RIOK3	1296.51	3089.68	2.38308	1.24226	6.58725e-33	2.11655e-29	up
DBF4	153.878	506.76	3.29326	1.6893	1.51423e-28	2.86199e-25	up
SMIM3	314.632	1590.41	5.05484	2.26157	4.37985e-28	7.03646e-25	up
ISCA1	427.725	1008.96	2.3589	1.22519	5.74596e-28	8.7916e-25	up
PGRMC1	1379.82	11501	8.33514	2.89004	2.24244e-27	3.00216e-24	up
NDUFAF5	142.572	373.591	2.62037	1.37165	2.90383e-27	3.73211e-24	up
DCTN6	121.032	386.539	3.19371	1.6438	2.13569e-25	2.07945e-22	up
BTG3	95.6299	451.17	4.71788	2.16414	4.99121e-25	4.71684e-22	up
MINDY3	184.485	431.357	2.33816	1.21173	5.79886e-25	5.32352e-22	up
THUMPD2	153.731	388.863	2.5295	1.3225	7.80464e-25	6.96586e-22	up
TBC1D15	524.66	1424.63	2.71534	1.41955	1.18921e-24	9.79757e-22	up
EGF	85.9311	721.118	8.39182	2.87634	2.18849e-24	1.71508e-21	up
ODC1	1276.15	3711.77	2.90856	1.51422	2.95674e-24	2.20467e-21	up
CLIC4	404.443	1338.75	3.31011	1.68966	3.01907e-24	2.20467e-21	up
PTBP2	319.11	645.012	2.02129	1.00614	7.96041e-24	5.21992e-21	up
PKHD1L1	41.2601	287.569	6.96966	2.64796	1.00445e-23	6.45477e-21	up
C18orf21	152.661	322.959	2.11554	1.07095	9.3599e-23	5.09734e-20	up
GNA13	1665.1	3704.62	2.22487	1.14134	3.46599e-22	1.59472e-19	up
HIST1H2BN	38.4909	201.328	5.23052	2.28597	3.57511e-22	1.61791e-19	up
MT1E	36.0859	2693.92	74.6529	4.78128	4.21336e-22	1.88027e-19	up
CTNNAL1	35.5954	168.441	4.73211	2.15518	6.91923e-22	2.8142e-19	up
TRIM13	264.632	697.847	2.63704	1.37613	1.54369e-21	5.83532e-19	up
ADIPOR1	1620.61	4025.21	2.48375	1.29379	2.62267e-21	9.68608e-19	up
PDCD10	407.618	884.249	2.16931	1.10566	3.03816e-21	1.07274e-18	up
ZNF367	109.511	318.166	2.90533	1.50493	4.4724e-21	1.54519e-18	up
NR4A3	10.8561	159.893	14.7284	3.45002	5.26787e-21	1.7817e-18	up
PCNP	1300.73	2783.06	2.13961	1.08547	5.85104e-21	1.93814e-18	up
CMC2	269.305	589.641	2.18949	1.1196	1.79438e-20	5.49098e-18	up
C2orf88	561.745	3582.37	6.37721	2.51689	3.30103e-20	9.6423e-18	up
XK	70.0733	615.319	8.78108	2.88893	3.41179e-20	9.87605e-18	up
SIAH2	739.818	1536.11	2.07633	1.04374	3.90564e-20	1.12046e-17	up
COPS2	436.317	1066.3	2.44385	1.27067	5.03482e-20	1.41907e-17	up
AREG	14.4807	174.185	12.0288	3.22637	5.43055e-20	1.50567e-17	up
MTHFD2L	128.326	406.831	3.1703	1.62233	6.16181e-20	1.69218e-17	up
USPL1	494.836	1104.96	2.23299	1.14447	7.15857e-20	1.94925e-17	up
RNF11	1229.45	5776.48	4.69844	2.13726	8.24738e-20	2.2083e-17	up
RGS10	1239.67	5036.94	4.06313	1.95043	1.46613e-19	3.89323e-17	up
GPX1P1	202.132	1185.97	5.86727	2.4113	1.50673e-19	3.96825e-17	up
MAIP1	58.8156	137.499	2.3378	1.21624	1.82964e-19	4.74099e-17	up
CD69	1060.4	5423.38	5.11448	2.24103	2.71496e-19	6.92336e-17	up
FAH	146.696	474.859	3.23702	1.65087	3.21984e-19	8.14619e-17	up
ATAD2	185.086	482.648	2.6077	1.35799	4.3681e-19	1.06327e-16	up
FAM81B	6.23945	49.0195	7.85639	2.74194	7.28265e-19	1.67568e-16	up
SPARC	3721.34	27615.7	7.42091	2.6815	9.154e-19	2.00086e-16	up
NDUFV2	60.8261	280.791	4.61629	2.10837	9.59702e-19	2.08353e-16	up
DYTN	13.2092	82.6131	6.25423	2.4798	1.09764e-18	2.36701e-16	up
HIST1H1E	6.68931	148.834	22.2495	3.77704	1.10623e-18	2.36961e-16	up
PTK2	155.78	440.627	2.82852	1.46568	1.28817e-18	2.70523e-16	up
CCNG1	601.993	1221.73	2.02948	1.00972	1.31596e-18	2.72795e-16	up
HIST1H4H	109.264	1157.33	10.5921	3.06693	2.18524e-18	4.28134e-16	up
SDC4	45.0454	176.486	3.91797	1.89632	2.46111e-18	4.79261e-16	up
LMNA	695.708	1991.68	2.86282	1.48398	2.62068e-18	5.07259e-16	up
NDUFA5	492.025	1180.7	2.39966	1.24204	3.85028e-18	7.23471e-16	up
USP14	416.023	848.44	2.03941	1.01738	4.05352e-18	7.44664e-16	up
HIST1H2BK	354.972	1540.92	4.34097	2.02861	4.03951e-18	7.44664e-16	up
MT-TC	1214.57	9006.51	7.41539	2.67283	4.29107e-18	7.78963e-16	up
RGS18	1750.29	9479.99	5.41624	2.3028	4.91818e-18	8.77922e-16	up
ARHGAP21	467.297	1375.05	2.94255	1.51932	5.79181e-18	1.02816e-15	up
HIST1H2AG	119.491	663.955	5.55654	2.33232	6.67532e-18	1.17205e-15	up
C3orf38	248.826	578.258	2.32394	1.19885	7.84878e-18	1.37059e-15	up
PABPC1P3	12.6203	76.7653	6.08268	2.43869	8.3492e-18	1.4501e-15	up
ELOVL7	119.055	797.982	6.70265	2.55258	9.18716e-18	1.58706e-15	up
GUCY1B1	107.846	656.723	6.08947	2.43916	1.09715e-17	1.86521e-15	up
RGS1	192.144	1463.77	7.61808	2.69753	1.27548e-17	2.14567e-15	up
GLA	365.639	888.901	2.43109	1.26014	1.43424e-17	2.40018e-15	up
CMAHP	260.859	574.868	2.20375	1.12242	1.54546e-17	2.57143e-15	up
PF4	3260	20545.4	6.30228	2.47907	1.55257e-17	2.57143e-15	up
ETFA	703.739	2017.04	2.86618	1.48366	1.83318e-17	2.98995e-15	up
RLF	432.532	1249.83	2.88958	1.4944	1.82965e-17	2.98995e-15	up
HIST2H2BE	1039.82	5334.03	5.12974	2.23229	1.87838e-17	3.04549e-15	up
PPIL4	223.661	557.808	2.49399	1.29376	2.14506e-17	3.41203e-15	up
MT-ATP8	1790.6	15296.7	8.54278	2.81943	2.512e-17	3.93722e-15	up
KIFAP3	170.748	392.82	2.30058	1.18339	2.54682e-17	3.95322e-15	up
DCTN4	408.343	1031.4	2.52581	1.31206	3.42574e-17	5.05957e-15	up
MT-TN	1756.47	9356.12	5.32667	2.27596	3.4052e-17	5.05957e-15	up
HIST1H2BL	2.32077	16.687	7.1903	2.65758	4.4727e-17	6.47352e-15	up
C3orf35	28.0989	74.8608	2.66419	1.38742	5.03249e-17	7.15482e-15	up
ARMCX3	422.345	902.425	2.1367	1.07976	5.79971e-17	8.13758e-15	up
HIST1H2BO	22.2319	378.27	17.0147	3.48322	7.25201e-17	9.83183e-15	up
TCEAL9	16.5261	82.9453	5.01906	2.20802	7.46719e-17	1.00388e-14	up
IFI27	31.7111	3348.59	105.597	4.53429	7.45799e-17	1.00388e-14	up
SUPV3L1	298.315	675.504	2.2644	1.16129	8.08443e-17	1.08234e-14	up
OPA1	736.312	2090.55	2.83921	1.46913	8.34686e-17	1.11283e-14	up
HIST1H2BH	77.9387	600.437	7.70396	2.69801	9.00419e-17	1.19551e-14	up
PRKAR2B	1176.67	8299.67	7.05353	2.59929	9.39666e-17	1.24164e-14	up
HIST1H2BJ	176.475	1092.97	6.19333	2.4499	1.09102e-16	1.43084e-14	up
PPBP	2706.3	23259	8.5944	2.8151	1.15217e-16	1.4988e-14	up
MCUR1	337.429	1313.21	3.8918	1.88174	1.25789e-16	1.62973e-14	up
ID1	68.5893	343.119	5.00251	2.19606	1.53281e-16	1.9544e-14	up
LNCAROD	9.77692	85.1667	8.71099	2.82313	1.72369e-16	2.18047e-14	up
GORAB	162.494	378.852	2.33149	1.19868	1.81535e-16	2.26961e-14	up
PTPN12	1820.48	5540.53	3.04345	1.56151	1.81002e-16	2.26961e-14	up
MRPL47	175.665	393.209	2.2384	1.14736	1.98633e-16	2.45472e-14	up
NT5C3A	913.742	3132.02	3.42769	1.71777	2.04826e-16	2.50238e-14	up
CNST	619.519	1274.43	2.05713	1.02742	2.0906e-16	2.54443e-14	up
NAT8B	36.1754	270.161	7.46808	2.65727	2.29919e-16	2.75654e-14	up
F13A1	3018.19	17289.3	5.72839	2.35497	2.34069e-16	2.79586e-14	up
INSIG1	682.828	1844.8	2.70171	1.4019	2.41643e-16	2.87564e-14	up
HRASLS	21.4558	161.32	7.51874	2.66258	2.809e-16	3.27015e-14	up
FAXDC2	301.929	1408.6	4.66532	2.10698	2.87825e-16	3.33867e-14	up
MAP3K8	698.656	1587.04	2.27156	1.16524	3.41677e-16	3.92086e-14	up
CAV2	16.7897	111.513	6.64174	2.52509	3.62276e-16	4.12776e-14	up
PCSK6	141.247	1004.01	7.10819	2.5991	3.75256e-16	4.26055e-14	up
NUP54	283.683	649.36	2.28904	1.17516	3.76739e-16	4.26232e-14	up
ERMN	195.77	577.498	2.94987	1.51874	3.90404e-16	4.38604e-14	up
LY6G6F	30.2294	198.602	6.56981	2.50917	3.95121e-16	4.42356e-14	up
MMD	929.936	6663.85	7.16592	2.60823	4.05886e-16	4.52831e-14	up
TWF1	410.453	916.174	2.23211	1.14064	5.17511e-16	5.63666e-14	up
MTURN	1388.04	6844.01	4.9307	2.17249	5.49354e-16	5.96327e-14	up
ESAM	379.871	1821.28	4.79448	2.13815	5.95387e-16	6.44121e-14	up
GEN1	179.745	398.534	2.21722	1.13152	6.28743e-16	6.75657e-14	up
PYROXD1	242.486	532.243	2.19494	1.11688	6.42649e-16	6.88298e-14	up
SMOX	717.994	3498.57	4.87269	2.15744	6.90586e-16	7.32318e-14	up
PTGS1	2203	10556.4	4.79182	2.1364	8.23769e-16	8.70675e-14	up
HIF1A	1189.87	4785.09	4.02151	1.91936	8.71034e-16	9.14615e-14	up
EIF2AK1	1847.35	5169.01	2.79806	1.4477	8.98645e-16	9.3748e-14	up
ST7	90.2728	260.438	2.88501	1.48387	9.52574e-16	9.90523e-14	up
ZNF185	941.654	4510.56	4.79003	2.13501	1.04211e-15	1.07665e-13	up
HIST1H2AC	2310.22	12364.8	5.3522	2.26818	1.06406e-15	1.08194e-13	up
CAVIN2	2799.71	16479.5	5.88615	2.37897	1.19326e-15	1.20633e-13	up
CMTM5	289.525	2135.41	7.37556	2.63236	1.29019e-15	1.29547e-13	up
RSRC2	1259.17	3118.8	2.47687	1.283	1.38313e-15	1.38446e-13	up
PDE2A	28.8132	133.087	4.61895	2.09093	1.47369e-15	1.46145e-13	up
ARG2	17.6818	67.6888	3.82817	1.85528	1.48002e-15	1.46321e-13	up
GOLT1B	409.822	859.118	2.09632	1.05306	1.62861e-15	1.58572e-13	up
RHOBTB1	104.837	547.819	5.22541	2.23645	1.85228e-15	1.78725e-13	up
TTC7B	128.357	610.533	4.75651	2.1235	2.01367e-15	1.93716e-13	up
SAMSN1	405.14	1114.84	2.75174	1.42424	2.17228e-15	2.0773e-13	up
OSBPL10-AS1	1.84065	25.6192	13.9186	3.24789	2.42197e-15	2.28884e-13	up
TPM4	3228.57	8622.44	2.67067	1.38413	2.48583e-15	2.34229e-13	up
TAPT1	461.424	1022.74	2.21649	1.13016	2.62651e-15	2.46042e-13	up
LEPROT	966.228	2165.05	2.24072	1.14454	3.14355e-15	2.90246e-13	up
BLOC1S6	876.768	1967.55	2.24409	1.14693	3.15708e-15	2.90659e-13	up
NDUFA6	658.389	1494.47	2.26988	1.16345	3.18101e-15	2.91194e-13	up
CENPU	31.583	111.91	3.54335	1.76441	3.33321e-15	3.0314e-13	up
THBS1	592.715	3583.41	6.04575	2.40353	3.82059e-15	3.42904e-13	up
ANKRD9	210.363	774.681	3.6826	1.8041	4.32538e-15	3.84983e-13	up
ZNF385D	23.6488	134.935	5.70578	2.33268	4.40357e-15	3.90859e-13	up
SPX	49.266	451.995	9.17458	2.85012	4.82526e-15	4.22453e-13	up
SHLD3	62.7643	131.59	2.09658	1.05351	4.88799e-15	4.26782e-13	up
NEXN	101.629	522.074	5.13705	2.21266	5.14694e-15	4.48174e-13	up
SEC24B	537.223	1109.15	2.0646	1.03164	5.65654e-15	4.85963e-13	up
RAB4A	434.652	1026.22	2.36102	1.21524	5.79038e-15	4.94816e-13	up
HIGD1A	268.533	606.799	2.25968	1.15505	6.35832e-15	5.40474e-13	up
GTF2B	307.979	663.754	2.1552	1.0929	6.62678e-15	5.60329e-13	up
ACRBP	1048.33	4808.71	4.58703	2.07564	7.04445e-15	5.9098e-13	up
BNIP1	101.558	225.03	2.21579	1.13382	7.61858e-15	6.33391e-13	up
SH3D19	8.51899	56.3413	6.61362	2.49401	7.73969e-15	6.40938e-13	up
ARHGAP18	255.021	777.893	3.05031	1.55799	7.99096e-15	6.60045e-13	up
MT-ND4L	12553.5	76145.5	6.06566	2.40277	8.35056e-15	6.86219e-13	up
MEIS1	97.1202	505.531	5.20521	2.22523	8.77972e-15	7.19646e-13	up
HEMGN	83.2516	362.523	4.35455	2.01076	8.89265e-15	7.27048e-13	up
RSU1	1230.45	3946.5	3.20736	1.62449	9.24282e-15	7.51851e-13	up
CLEC1B	190.501	636.788	3.3427	1.67774	9.61764e-15	7.78399e-13	up
LSM1	202.872	452.945	2.23266	1.13745	1.0106e-14	8.15867e-13	up
MAP2	6.56766	46.5732	7.0913	2.57517	1.08285e-14	8.72008e-13	up
INAFM2	651.765	1573.33	2.41395	1.24546	1.19887e-14	9.51136e-13	up
ABLIM3	296.545	1755.05	5.91833	2.37218	1.27428e-14	1.00847e-12	up
ARL4A	235.798	570.776	2.42062	1.251	1.33601e-14	1.04701e-12	up
EGFL7	77.2311	498.7	6.45724	2.46972	1.58632e-14	1.22524e-12	up
TMEM45A	7.76249	60.7784	7.82977	2.67532	1.7158e-14	1.3189e-12	up
RINT1	165.997	339.044	2.04247	1.0141	1.83785e-14	1.39933e-12	up
YOD1	331.606	1010.99	3.04876	1.5568	1.99479e-14	1.50811e-12	up
ARHGEF12	416.155	1519.1	3.65031	1.78854	2.04704e-14	1.53676e-12	up
EIF1B	738.764	1493.64	2.0218	1.00273	2.18658e-14	1.63389e-12	up
FRMD3	137.395	608.626	4.42976	2.02775	2.66919e-14	1.97158e-12	up
CDK2AP1	222.939	586.875	2.63245	1.36041	2.71246e-14	1.99895e-12	up
IPO11	83.6731	234.949	2.80794	1.44681	2.7226e-14	2.00183e-12	up
TPM1	224.544	886.391	3.94752	1.88515	3.04205e-14	2.2316e-12	up
BEND2	126.046	870.576	6.90681	2.53695	3.07908e-14	2.25362e-12	up
MMP1	1.82369	35.1351	19.2659	3.45081	3.29389e-14	2.38907e-12	up
CXCR2P1	549.608	2320.63	4.22234	1.96848	3.67537e-14	2.64191e-12	up
RAB6B	98.6691	629.665	6.38158	2.44878	3.93243e-14	2.77699e-12	up
MT-TL1	174.2	1063.62	6.10572	2.39978	4.10748e-14	2.8816e-12	up
PDE5A	192.48	796.191	4.13648	1.94176	4.63122e-14	3.2209e-12	up
C12orf75	525.769	1932.31	3.67521	1.79513	4.67431e-14	3.24385e-12	up
AGFG1	1010.91	2564.36	2.53668	1.31197	4.70884e-14	3.26077e-12	up
SH3TC2	32.7139	178.942	5.46992	2.27135	4.72537e-14	3.26518e-12	up
LRRC32	13.839	59.14	4.27344	1.98036	5.18629e-14	3.5607e-12	up
RGS17P1	19.2747	62.6389	3.24979	1.64042	5.23463e-14	3.58622e-12	up
VAMP7	567.838	1281.28	2.25642	1.1518	5.50475e-14	3.75527e-12	up
SNCA	208.842	881.14	4.21916	1.96555	5.57439e-14	3.7867e-12	up
PSMA6	88.778	225.222	2.53692	1.31233	5.79315e-14	3.927e-12	up
RYR2	9.83936	79.7734	8.10758	2.69777	6.13718e-14	4.15144e-12	up
STEAP1B	4.90798	28.632	5.83376	2.33329	6.86614e-14	4.57709e-12	up
MT-TS2	62.6612	620.799	9.90723	2.89668	7.07628e-14	4.70741e-12	up
ARPC3P1	6.81659	27.628	4.05305	1.91776	7.77222e-14	5.12791e-12	up
HRAT92	158.891	992.372	6.2456	2.42045	8.4222e-14	5.52273e-12	up
C16orf87	138.995	291.939	2.10035	1.05478	8.4852e-14	5.55271e-12	up
MAOB	4.80281	54.8581	11.4221	3.01619	8.5382e-14	5.57603e-12	up
KDM6A	664.61	1475.05	2.21942	1.13037	9.17311e-14	5.96642e-12	up
EMC3	578.437	1215.94	2.10211	1.05507	9.78677e-14	6.33989e-12	up
VEPH1	31.3248	166.962	5.33001	2.23689	1.01343e-13	6.52555e-12	up
WDFY1	693.254	1439.37	2.07625	1.03879	1.18365e-13	7.54603e-12	up
IL10	2.91305	32.0367	10.9976	2.98405	1.19808e-13	7.60783e-12	up
MT-RNR1	109012	724221	6.6435	2.48448	1.30506e-13	8.27079e-12	up
RBX1	852.322	2203.09	2.58481	1.33614	1.3173e-13	8.33193e-12	up
TMEM70	214.069	500.873	2.33977	1.20276	1.36153e-13	8.59477e-12	up
PROS1	45.6763	396.33	8.67694	2.75656	1.67964e-13	1.04388e-11	up
VEGFC	5.11895	33.5797	6.55987	2.46636	1.7605e-13	1.08555e-11	up
KLF9	589.666	1318.26	2.23561	1.1397	1.80506e-13	1.10684e-11	up
MIR155HG	38.359	100.054	2.60837	1.34878	1.99404e-13	1.21576e-11	up
MT-RNR2	266444	1.74552e+06	6.55117	2.46581	2.03897e-13	1.23845e-11	up
SPHK1	249.421	593.141	2.37807	1.22452	2.05497e-13	1.24581e-11	up
TMEM40	263.063	1339.65	5.09252	2.18397	2.1733e-13	1.30524e-11	up
IL12A	24.9487	59.4302	2.3821	1.22726	2.40322e-13	1.42732e-11	up
RIPOR3	41.9044	130.892	3.1236	1.58219	2.46103e-13	1.45627e-11	up
STXBP5-AS1	38.4317	129.639	3.37324	1.67691	2.48034e-13	1.465e-11	up
LRRC8B	163.693	343.564	2.09884	1.05221	2.55068e-13	1.49555e-11	up
NT5M	240.73	1367.63	5.68118	2.30705	2.74193e-13	1.60475e-11	up
RAB11A	1342.92	2950.51	2.19709	1.11528	3.0508e-13	1.77261e-11	up
P2RY12	54.5976	295.086	5.40473	2.24795	3.19487e-13	1.85297e-11	up
DOK6	58.6555	187.76	3.20106	1.60956	3.30432e-13	1.90955e-11	up
ETFRF1	107.588	218.713	2.03287	1.00476	3.33729e-13	1.92169e-11	up
PF4V1	148.494	1766.63	11.8969	3.04065	3.40137e-13	1.95509e-11	up
CA2	432.641	2958.86	6.83907	2.50652	3.70111e-13	2.12358e-11	up
MT1X	80.5657	1938.74	24.064	3.55951	3.76526e-13	2.15653e-11	up
ACVR1	211.239	481.374	2.27881	1.16208	3.8875e-13	2.21864e-11	up
MFSD2B	56.8213	278.143	4.89505	2.13288	3.88291e-13	2.21864e-11	up
LEPR	86.3513	347.804	4.02778	1.89965	3.93772e-13	2.23934e-11	up
CHD1	1118.71	3633.67	3.24809	1.63304	4.21484e-13	2.38428e-11	up
OST4	2559.17	9107.16	3.55863	1.74859	4.52517e-13	2.54193e-11	up
SH3BGRL	2038.42	4684.83	2.29826	1.17618	4.70029e-13	2.62196e-11	up
SRSF10	1742.55	3864.54	2.21775	1.12791	4.98096e-13	2.75462e-11	up
SREK1	1164.01	2904.36	2.49513	1.28711	5.0757e-13	2.80219e-11	up
MSANTD3	138.027	474.707	3.43924	1.70381	5.17588e-13	2.84771e-11	up
TREML1	719.912	4790.54	6.65434	2.47447	5.27723e-13	2.88863e-11	up
MLH3	591.279	2203.91	3.72737	1.80556	5.32957e-13	2.91232e-11	up
SH3BGRL2	609.064	3258.75	5.35042	2.23475	5.54818e-13	3.0215e-11	up
CARD19	1243.03	2636.45	2.12099	1.06675	5.95383e-13	3.22452e-11	up
ABCC4	181.092	572.723	3.16261	1.59777	5.96111e-13	3.22452e-11	up
HAUS3	355.031	724.67	2.04114	1.01367	7.04264e-13	3.75269e-11	up
HIST1H2BG	79.0645	301.728	3.81623	1.83262	7.20604e-13	3.82706e-11	up
TRBV7-4	14.9414	74.0039	4.95294	2.14007	7.33228e-13	3.88127e-11	up
FHL2	48.1357	154.943	3.21888	1.62013	7.86134e-13	4.14766e-11	up
WFDC1	1.052	72.5131	68.929	3.94905	7.92241e-13	4.17303e-11	up
GNG11	1046.99	6502.18	6.21035	2.39698	8.05708e-13	4.23702e-11	up
ARHGAP6	93.9586	388.707	4.13701	1.9303	8.18436e-13	4.28991e-11	up
TP53BP2	479.726	1078.53	2.24822	1.14564	8.23363e-13	4.30332e-11	up
RBM15	371.648	843.671	2.27008	1.15947	8.2821e-13	4.32e-11	up
TMEM158	100.024	623.233	6.23083	2.40015	8.38334e-13	4.36572e-11	up
DERA	250.637	541.798	2.16169	1.09155	8.42088e-13	4.37817e-11	up
HIST1H4I	173.917	672.514	3.86687	1.84974	8.86891e-13	4.58884e-11	up
CREM	203.597	478.547	2.35047	1.2067	8.92823e-13	4.60828e-11	up
GRHL1	34.4211	143.01	4.15473	1.93248	8.9705e-13	4.61909e-11	up
CAMTA1	314.539	790.813	2.5142	1.29599	9.17508e-13	4.69434e-11	up
TDRP	48.0466	243.277	5.06336	2.16698	9.35477e-13	4.77108e-11	up
B2M	85535.8	201479	2.3555	1.209	1.07188e-12	5.38976e-11	up
UHRF2	1093.36	2233.67	2.04294	1.01456	1.08228e-12	5.43355e-11	up
GRB14	18.5682	127.932	6.88983	2.50184	1.0958e-12	5.4843e-11	up
MT-TR	159.037	1276.34	8.02547	2.65871	1.12458e-12	5.61957e-11	up
LRRC70	6.27883	29.2052	4.65138	2.06631	1.17459e-12	5.83321e-11	up
MTMR2	164.902	349.691	2.1206	1.06318	1.21714e-12	6.02585e-11	up
PCGF5	1213.68	2462.56	2.02899	1.00472	1.22183e-12	6.0398e-11	up
PIGA	221.855	843.601	3.80248	1.82718	1.2416e-12	6.12809e-11	up
OR2B6	12.2833	187.681	15.2793	3.21933	1.25312e-12	6.17548e-11	up
ABCC3	623.518	2506.25	4.01953	1.89499	1.28513e-12	6.31386e-11	up
PTCRA	339.423	1640.81	4.8341	2.1137	1.30471e-12	6.40024e-11	up
HSF2	185.015	455.754	2.46333	1.26761	1.38337e-12	6.7347e-11	up
FFAR1	22.2883	103.057	4.62379	2.06399	1.5273e-12	7.35737e-11	up
MCPH1-AS1	25.0292	102.077	4.0783	1.90637	1.57526e-12	7.57704e-11	up
PRDX6	1461.03	3632.16	2.48603	1.28076	1.64932e-12	7.88206e-11	up
ENC1	285.339	790.124	2.76907	1.42341	1.69796e-12	8.09452e-11	up
CHPT1	334.963	774.557	2.31236	1.18335	1.76374e-12	8.38323e-11	up
MAPK6	275.781	815.239	2.95612	1.50853	1.87302e-12	8.83731e-11	up
PCYT1B	36.8812	185.43	5.02776	2.15615	1.95056e-12	9.13606e-11	up
MYLK	358.454	1882.6	5.252	2.20534	1.98525e-12	9.28501e-11	up
ARID2	330.203	740.83	2.24356	1.14207	1.99053e-12	9.29616e-11	up
PROSER2	58.3621	170.17	2.91576	1.4868	2.10351e-12	9.78119e-11	up
PRTFDC1	19.3382	86.6515	4.48083	2.01431	2.13132e-12	9.86765e-11	up
TFRC	715.947	1604.77	2.24146	1.14118	2.18929e-12	1.01069e-10	up
MED12L	38.1381	144.016	3.77617	1.8128	2.22717e-12	1.02376e-10	up
ZNF529-AS1	34.5269	87.775	2.54222	1.30094	2.23979e-12	1.0281e-10	up
MAST4-AS1	10.9072	58.1207	5.32864	2.21087	2.3539e-12	1.07434e-10	up
SLF1	106.801	220.506	2.06465	1.02634	2.39529e-12	1.09167e-10	up
TSC22D3	9754.41	22323.1	2.28851	1.16922	2.46408e-12	1.11669e-10	up
FAM83D	15.2699	39.1442	2.56349	1.32979	2.53984e-12	1.1494e-10	up
PRKG1	4.34424	28.9762	6.67002	2.45217	2.57794e-12	1.165e-10	up
PDE4D	412.076	1329.74	3.22693	1.61982	2.80487e-12	1.25871e-10	up
ETF1	1001.69	2483.81	2.47963	1.27679	2.83513e-12	1.26874e-10	up
PI4K2A	336.356	939.744	2.7939	1.43468	2.85743e-12	1.27694e-10	up
HIST1H2AI	8.85085	57.4665	6.49277	2.42797	2.91158e-12	1.29753e-10	up
TRAPPC3L	20.6735	95.5506	4.62188	2.0509	2.92094e-12	1.2999e-10	up
MIER3	212.224	455.05	2.14419	1.07968	3.02786e-12	1.34191e-10	up
TIMP1	1527.74	4568.6	2.99042	1.52249	3.08496e-12	1.36345e-10	up
AP1G1	1106.46	2245.01	2.02901	1.00457	3.32905e-12	1.46328e-10	up
RAB32	823.562	1930.82	2.34447	1.20148	3.59138e-12	1.57214e-10	up
UQCRH	1213.11	2530.99	2.08635	1.04291	3.61717e-12	1.57912e-10	up
SEC14L2	48.1362	150.679	3.13027	1.58449	3.75993e-12	1.63345e-10	up
GRAP2	2502.02	8180.92	3.26973	1.63585	3.77587e-12	1.63728e-10	up
TFPI	15.1482	80.9067	5.341	2.21858	3.83637e-12	1.66127e-10	up
SIAH1	139.851	352.831	2.52291	1.29955	3.91086e-12	1.68898e-10	up
ITGB3	384.016	2136.99	5.56484	2.26456	3.9292e-12	1.69462e-10	up
SESTD1	365.522	815.652	2.23148	1.13341	4.21099e-12	1.80887e-10	up
MTND2P28	2931.66	12202.6	4.16235	1.93178	4.28274e-12	1.83478e-10	up
ZNF14	132.855	293.13	2.2064	1.11883	4.70776e-12	1.99822e-10	up
MAP4K3	116.73	265.761	2.27672	1.15988	6.1224e-12	2.53831e-10	up
LIMS1	1549.19	4349.54	2.80762	1.43905	6.4003e-12	2.63651e-10	up
MGLL	374.962	1743.12	4.64879	2.05855	6.79396e-12	2.7844e-10	up
KLHL5	276.05	584.737	2.11822	1.06163	6.82535e-12	2.7937e-10	up
TIPARP	389.343	1092.04	2.80483	1.43788	6.84801e-12	2.79941e-10	up
ZNF292	749.605	1728.06	2.30529	1.17756	6.88561e-12	2.8112e-10	up
TRPC2	23.5011	125.632	5.34577	2.21165	6.95555e-12	2.83615e-10	up
PLA2G12A	252.361	780.906	3.09441	1.56307	7.08439e-12	2.88137e-10	up
GP9	415.547	2172.83	5.22884	2.19153	7.15424e-12	2.90611e-10	up
MIR181A1HG	4.52332	35.9631	7.95061	2.61554	7.90859e-12	3.17177e-10	up
IL15	268.982	571.785	2.12574	1.06763	8.0673e-12	3.22401e-10	up
GNAS	10720.7	26570	2.47839	1.27467	8.23067e-12	3.27707e-10	up
DMTN	914.348	3473.47	3.79884	1.81878	8.51265e-12	3.36847e-10	up
CHST8	20.592	120.587	5.85603	2.31642	8.55842e-12	3.38242e-10	up
RN7SL834P	27.6993	92.74	3.3481	1.66294	8.59029e-12	3.39084e-10	up
RADIL	5.39929	26.3964	4.88887	2.11684	8.64292e-12	3.40743e-10	up
TSC22D1	885.599	2796.73	3.15801	1.58908	9.91231e-12	3.87932e-10	up
PDLIM1	826.751	2750.65	3.32706	1.65461	1.04771e-11	4.08049e-10	up
PARD3	39.1976	174.986	4.4642	2.00743	1.04681e-11	4.08049e-10	up
STON2	73.0984	234.088	3.20237	1.60543	1.07534e-11	4.1729e-10	up
MT-TV	251.245	1636.07	6.51185	2.42197	1.14744e-11	4.42599e-10	up
RLIM	539.511	1722.7	3.19308	1.6026	1.16738e-11	4.49748e-10	up
WHAMMP3	224.804	711.02	3.16284	1.58925	1.19732e-11	4.6018e-10	up
UTP15	179.52	378.255	2.10704	1.05408	1.25635e-11	4.79428e-10	up
MT-ND2	71955.1	337864	4.69549	2.06594	1.35736e-11	5.16135e-10	up
GLYATL1P1	6.84554	38.3916	5.60827	2.25049	1.38903e-11	5.2693e-10	up
RNU6-574P	4.05404	27.4903	6.78096	2.4593	1.45206e-11	5.48249e-10	up
TEX45	1.42969	13.5499	9.47752	2.74945	1.52614e-11	5.72854e-10	up
GSTO1	867.929	1791.5	2.06411	1.02733	1.56405e-11	5.82998e-10	up
SSX2IP	206.365	513.297	2.48732	1.27677	1.61736e-11	6.01476e-10	up
KCNRG	4.92356	16.935	3.43959	1.69453	1.6466e-11	6.1023e-10	up
MYEOV	43.1431	211.876	4.91101	2.11294	1.72527e-11	6.37181e-10	up
ENDOD1	379.379	1218.77	3.21255	1.60837	1.83426e-11	6.74331e-10	up
BMP6	185.611	821.867	4.4279	1.9958	1.92906e-11	7.07563e-10	up
DENND4A	484.037	1200.28	2.47973	1.27382	1.9371e-11	7.09704e-10	up
GNA15	529.73	1115.84	2.10643	1.05475	1.97151e-11	7.20665e-10	up
MIR222HG	27.6371	139.951	5.06387	2.14631	1.97738e-11	7.21992e-10	up
ZBTB43	416.012	1335.35	3.20988	1.60754	2.01761e-11	7.33347e-10	up
EIF2AK3	337.223	948.032	2.81129	1.43811	2.15259e-11	7.79763e-10	up
MT-CO3	71901.9	270528	3.76246	1.8031	2.2196e-11	8.02227e-10	up
TMEM135	89.6865	183.847	2.04988	1.01884	2.27066e-11	8.1976e-10	up
PNMA1	666.216	1664.49	2.49842	1.28327	2.34722e-11	8.42921e-10	up
PIM3	2294.22	6207.56	2.70573	1.38859	2.34793e-11	8.42921e-10	up
AIG1	163.81	465.354	2.84081	1.45056	2.49548e-11	8.89927e-10	up
IDI1	741.594	1774.67	2.39304	1.22656	2.56462e-11	9.11548e-10	up
MRPL37P1	0.633	8.90212	14.0634	3.04486	2.56854e-11	9.11932e-10	up
TKTL2	3.09371	18.2517	5.89963	2.32079	2.57263e-11	9.12375e-10	up
GAS2L3	13.729	76.2881	5.5567	2.24299	2.64566e-11	9.34151e-10	up
KNL1	28.5148	77.3338	2.71206	1.3971	2.7046e-11	9.51825e-10	up
HIST1H3H	676.845	3903.29	5.76689	2.2865	2.77347e-11	9.73929e-10	up
FNBP1L	26.4006	94.8547	3.5929	1.73841	2.79499e-11	9.80373e-10	up
ARMC3	13.3125	68.0122	5.10891	2.15114	2.79793e-11	9.80373e-10	up
DUSP4	29.3939	125.717	4.27698	1.9563	2.8579e-11	9.99208e-10	up
GPX1	9152.49	30244.1	3.30447	1.64278	2.94162e-11	1.02312e-09	up
SLC30A1	374.533	2151.1	5.74343	2.28063	3.2199e-11	1.11007e-09	up
PER1	1912.15	6585.61	3.44408	1.69341	3.49312e-11	1.19148e-09	up
MT-CO2	72322.9	267833	3.70329	1.78191	3.50886e-11	1.19558e-09	up
WASF1	40.2953	113.419	2.8147	1.43504	3.52135e-11	1.19857e-09	up
MT-ND5	46331.8	208886	4.50849	2.01311	3.63506e-11	1.23335e-09	up
SLA2	870.606	2278.04	2.61662	1.34349	3.84084e-11	1.29496e-09	up
MYCT1	14.4495	74.4011	5.14905	2.16127	3.86781e-11	1.30269e-09	up
DHX15	1333.03	2867.37	2.15102	1.08239	4.06433e-11	1.36601e-09	up
TWISTNB	161.284	433.27	2.68638	1.37753	4.18372e-11	1.40174e-09	up
MT-TD	44.2089	275.116	6.2231	2.36138	4.24391e-11	1.42043e-09	up
MT-ND1	77780.7	347078	4.46227	2.00028	4.26306e-11	1.42535e-09	up
BAG4	159.927	351.306	2.19666	1.11012	4.28467e-11	1.42992e-09	up
OTOGL	0.212088	6.33681	29.8782	3.36683	4.28563e-11	1.42992e-09	up
MMRN1	47.9631	248.899	5.18938	2.16667	4.34361e-11	1.44776e-09	up
GAPDHP42	3.16438	23.5529	7.44313	2.53131	4.60998e-11	1.5239e-09	up
HIST1H2AE	80.5248	455.725	5.65944	2.2624	4.65013e-11	1.53559e-09	up
CEP152	112.744	234.897	2.08345	1.03791	4.76439e-11	1.56849e-09	up
AZIN1	1046.36	2139.12	2.04434	1.01281	4.80127e-11	1.57579e-09	up
STARD4	303.863	816.029	2.68552	1.37706	4.87112e-11	1.59383e-09	up
WDR11-AS1	78.3798	345.965	4.41396	1.98541	4.91657e-11	1.60706e-09	up
IGF2BP3	12.3484	49.7773	4.03108	1.86831	4.99585e-11	1.63132e-09	up
SELP	177.078	817.078	4.61423	2.03684	5.10766e-11	1.66107e-09	up
RNGTT	286.092	586.89	2.0514	1.01821	5.51914e-11	1.78586e-09	up
RGS6	76.0323	326.683	4.29664	1.95381	5.60605e-11	1.81033e-09	up
MYL9	1006.9	7219.9	7.17041	2.49842	5.95943e-11	1.91482e-09	up
GP6	99.5086	367.276	3.6909	1.77381	6.17493e-11	1.98011e-09	up
KBTBD8	101.158	324.276	3.20563	1.60201	6.36131e-11	2.03784e-09	up
ZC3HAV1L	33.7914	130.694	3.86767	1.83058	6.50482e-11	2.0776e-09	up
FAM160B1	456.308	1048.2	2.29712	1.17052	6.69818e-11	2.12878e-09	up
NAP1L5	52.156	124.102	2.37945	1.21536	6.71557e-11	2.13219e-09	up
ANO6	1081.46	2813.29	2.60139	1.33457	6.99726e-11	2.20853e-09	up
ZBTB11	543.225	1164.25	2.14322	1.07664	7.29809e-11	2.29897e-09	up
GRK5-IT1	2.13941	13.6265	6.36929	2.37061	7.36175e-11	2.31449e-09	up
HIST1H4K	7.87585	30.062	3.81698	1.80491	7.44065e-11	2.33017e-09	up
ENKUR	191.774	971.3	5.06481	2.13726	7.56829e-11	2.36783e-09	up
ADNP2	337.688	703.688	2.08384	1.0382	7.62862e-11	2.38439e-09	up
SLC25A36	656.316	1650.71	2.51511	1.29037	8.08632e-11	2.51278e-09	up
NEXN-AS1	7.21476	32.2828	4.47455	1.99334	8.2281e-11	2.54944e-09	up
SCGB1C1	8.60598	55.5106	6.45023	2.38361	8.4048e-11	2.5917e-09	up
ADAM9	261.534	703.504	2.68991	1.37711	8.43107e-11	2.5973e-09	up
MLF1	8.24791	39.4716	4.78565	2.06534	8.74643e-11	2.69187e-09	up
SMIM1	16.9612	74.5508	4.39537	1.984	9.41317e-11	2.87504e-09	up
SERPINE1	18.3245	59.9323	3.2706	1.62353	9.53069e-11	2.90541e-09	up
MT-CO1	181253	670978	3.70189	1.77674	9.64326e-11	2.93695e-09	up
ZNF326	410.787	844.185	2.05504	1.01931	9.72775e-11	2.95428e-09	up
MT-TA	47.3886	320.549	6.76425	2.4346	1.00846e-10	3.0511e-09	up
MT2A	831.669	12265.2	14.7478	3.07797	1.02159e-10	3.08793e-09	up
CMPK1	1764.66	3886.23	2.20225	1.11293	1.02946e-10	3.10005e-09	up
IL6	7.42822	78.0759	10.5107	2.82732	1.05309e-10	3.16824e-09	up
SVIP	453.62	1228.46	2.70812	1.38577	1.05524e-10	3.17173e-09	up
FAM183BP	6.95697	36.8586	5.29808	2.17495	1.06829e-10	3.20796e-09	up
CLU	2889.57	14209.7	4.91759	2.10199	1.13513e-10	3.38449e-09	up
GATA1	59.0369	241.749	4.09488	1.89518	1.16786e-10	3.46486e-09	up
SMYD3	86.2574	176.279	2.04364	1.00702	1.19638e-10	3.53317e-09	up
ITGA2B	2463.6	14913.9	6.05371	2.32111	1.24304e-10	3.65418e-09	up
TUBA8	13.3532	45.7839	3.42867	1.67139	1.25448e-10	3.68107e-09	up
TRIM58	282.076	1247.82	4.4237	1.98247	1.28379e-10	3.76365e-09	up
ITGB3BP	138.709	337.202	2.43099	1.24123	1.43842e-10	4.1933e-09	up
PIGHP1	12.121	48.0728	3.96606	1.85272	1.44124e-10	4.1946e-09	up
CDK17	525.184	1197.84	2.28079	1.1598	1.4438e-10	4.19825e-09	up
LYPLAL1	214.892	587.672	2.73473	1.39718	1.48267e-10	4.29186e-09	up
PARVB	520.085	1518.8	2.9203	1.48167	1.55512e-10	4.48945e-09	up
ANO2	2.0342	15.3558	7.54881	2.5119	1.60789e-10	4.61514e-09	up
TEX9	17.3728	51.0472	2.93834	1.47827	1.76884e-10	5.05197e-09	up
MT1L	3.06059	52.3163	17.0935	3.14878	1.79192e-10	5.1088e-09	up
SMIM5	165.979	702.76	4.23402	1.93016	1.96295e-10	5.56186e-09	up
MT1M	0.169648	64.4515	379.913	3.68468	1.99618e-10	5.65104e-09	up
TM4SF1	1.99686	19.615	9.82289	2.74929	2.03727e-10	5.74495e-09	up
RBM44	47.592	115.795	2.43308	1.24321	2.07695e-10	5.83331e-09	up
MT-TP	361.131	2266.67	6.27659	2.35107	2.07872e-10	5.83331e-09	up
PIP4P2	358.096	876.468	2.44758	1.2528	2.27465e-10	6.34984e-09	up
USP6NL	260.287	556.261	2.13711	1.07118	2.30755e-10	6.43609e-09	up
MATR3	57.1949	192.083	3.35839	1.65444	2.4056e-10	6.68059e-09	up
HTR2A	2.20397	19.0575	8.64689	2.62958	2.49031e-10	6.88607e-09	up
ITGB5	459.05	2096.85	4.56781	2.01384	2.52111e-10	6.95925e-09	up
NCKAP1	76.9986	265.27	3.44513	1.6827	2.56484e-10	7.06783e-09	up
TENT5C	636.665	1619.7	2.54403	1.30387	2.57501e-10	7.0837e-09	up
CDC42BPA	22.5262	64.1425	2.84746	1.4377	2.79859e-10	7.65891e-09	up
ITGA9-AS1	20.8696	105.752	5.06724	2.12279	2.89948e-10	7.90189e-09	up
SLC24A3	53.587	221.986	4.14253	1.89953	3.02094e-10	8.1912e-09	up
NCK2	1540.56	3592.72	2.33209	1.18811	3.187e-10	8.61406e-09	up
SLC35D2	155.532	348.512	2.24077	1.13255	3.2239e-10	8.68442e-09	up
NCBP2L	4.19411	27.9605	6.6666	2.39273	3.49415e-10	9.33887e-09	up
KLHL15	222.343	699.521	3.14613	1.5725	3.57182e-10	9.51628e-09	up
BEX3	374.958	1590.01	4.2405	1.92725	3.77259e-10	1.00179e-08	up
C1QC	17.2312	136.799	7.93898	2.56508	3.80199e-10	1.00628e-08	up
IGF2BP2	134.56	290.715	2.16048	1.08099	3.99058e-10	1.04927e-08	up
MAP3K1	1754.28	3955.17	2.25459	1.14296	4.01982e-10	1.0561e-08	up
TSPAN9	203.857	824.01	4.0421	1.87168	4.02636e-10	1.05695e-08	up
MSRB3	68.9578	268.902	3.89952	1.82734	4.33179e-10	1.12975e-08	up
SIAE	185.472	475.116	2.56166	1.309	4.499e-10	1.16673e-08	up
ZBTB10	220.109	876.222	3.98085	1.85309	4.80329e-10	1.23765e-08	up
PLIN2	479.525	1350.47	2.81626	1.43262	5.00002e-10	1.28217e-08	up
GLYATL1P2	10.4992	62.7033	5.97221	2.28484	5.18971e-10	1.32869e-08	up
TGFB1I1	50.0345	198.618	3.96961	1.84776	5.31677e-10	1.36014e-08	up
FSTL1	62.1871	370.044	5.9505	2.28485	5.67208e-10	1.44413e-08	up
HIST1H2BF	13.5159	50.1785	3.71257	1.76377	5.68212e-10	1.44555e-08	up
STMP1	844.794	2097.01	2.48227	1.26911	5.8335e-10	1.48171e-08	up
SNN	2860.96	6331.98	2.21324	1.11754	5.94277e-10	1.50708e-08	up
ANK1	160.364	461.269	2.87638	1.45796	6.03488e-10	1.52923e-08	up
C12orf76	284.419	746.488	2.62461	1.34077	6.10127e-10	1.54484e-08	up
PGAP1	74.8439	259.432	3.46631	1.68929	6.19849e-10	1.56698e-08	up
GPR18	96.046	231.417	2.40944	1.23164	6.32046e-10	1.5928e-08	up
ASAP2	35.3823	125.12	3.53623	1.70714	6.63428e-10	1.66338e-08	up
PSD3	24.6014	65.489	2.66201	1.35595	7.05359e-10	1.75553e-08	up
MTMR6	505.319	1087.67	2.15244	1.07988	7.17586e-10	1.78182e-08	up
FHL1	238.932	1003.72	4.20084	1.91116	7.26623e-10	1.80287e-08	up
LY6G6E	39.412	160.367	4.06899	1.87223	7.49574e-10	1.85408e-08	up
MSMO1	129.417	290.956	2.24821	1.14073	7.81074e-10	1.92459e-08	up
MASTL	108.617	251.25	2.31317	1.17538	7.84793e-10	1.93176e-08	up
OXTR	26.0215	110.701	4.25422	1.92287	7.94608e-10	1.95252e-08	up
VAC14-AS1	3.80644	17.198	4.51813	1.99492	8.0301e-10	1.96808e-08	up
RN7SL2	526.498	2189.42	4.15847	1.89973	8.06509e-10	1.97515e-08	up
STK19B	3.02551	35.5923	11.764	2.85786	8.35341e-10	2.03799e-08	up
CNN1	10.5997	67.3535	6.35428	2.34187	8.55998e-10	2.08522e-08	up
CTTN	609.213	2552.12	4.18921	1.90717	8.73548e-10	2.12475e-08	up
HJURP	27.0037	109.175	4.04295	1.87425	8.78959e-10	2.13629e-08	up
LGALS3	1144.67	2481.53	2.1679	1.08946	9.16539e-10	2.22259e-08	up
CTDSPL	247.898	1025.38	4.13629	1.89193	9.50811e-10	2.29186e-08	up
MT-TG	117.874	642.563	5.45126	2.18966	9.58638e-10	2.309e-08	up
STIL	23.1265	55.9256	2.41825	1.24258	9.80049e-10	2.35175e-08	up
DDX18P1	5.00037	22.3701	4.47368	1.96524	1.0022e-09	2.39953e-08	up
DIRAS1	37.3146	128.267	3.43744	1.67364	1.0646e-09	2.53008e-08	up
HIST1H2BD	119.822	509.365	4.251	1.92292	1.08103e-09	2.56533e-08	up
GALNT5	0.890928	8.57058	9.61984	2.65382	1.0843e-09	2.5712e-08	up
UBE2FP1	41.208	105.034	2.54888	1.29866	1.11933e-09	2.64451e-08	up
CFL2	123.526	264.172	2.13859	1.07027	1.16634e-09	2.7495e-08	up
RIPK2	294.141	839.021	2.85245	1.44591	1.1775e-09	2.77377e-08	up
ASH1L-AS1	39.8172	81.8224	2.05495	1.01369	1.18099e-09	2.77995e-08	up
SLC8A3	17.0438	78.8178	4.62442	2.00987	1.18196e-09	2.78021e-08	up
AQP10	72.2643	426.04	5.89558	2.26593	1.20479e-09	2.82976e-08	up
ASS1P1	7.80731	33.6263	4.30703	1.92621	1.22933e-09	2.88108e-08	up
GUCY1A1	58.296	206.694	3.54559	1.70803	1.23261e-09	2.88456e-08	up
PTPRN	16.818	90.355	5.37253	2.17155	1.23415e-09	2.88468e-08	up
RBM38	1979.05	4071.03	2.05706	1.01849	1.23893e-09	2.89302e-08	up
DCLRE1A	116.402	305.965	2.62851	1.34016	1.24279e-09	2.89782e-08	up
GCKR	0.489085	7.81961	15.9882	2.98635	1.2528e-09	2.91482e-08	up
DNM3	90.6328	285.442	3.14944	1.567	1.27784e-09	2.96235e-08	up
OSBP2	148.657	661.395	4.44914	1.97006	1.35104e-09	3.12528e-08	up
LAPTM4B	51.9691	181.47	3.49187	1.69284	1.35283e-09	3.12718e-08	up
RAB27B	202.397	614.29	3.03508	1.52202	1.39451e-09	3.20508e-08	up
SMILR	2.66274	40.5981	15.2467	3.00438	1.4338e-09	3.28129e-08	up
DDX47	88.8804	252.292	2.83856	1.43843	1.4713e-09	3.3528e-08	up
METTL21EP	9.78758	58.0992	5.93601	2.26109	1.48456e-09	3.37822e-08	up
TSPAN33	773.289	2103.35	2.72001	1.38482	1.55996e-09	3.54451e-08	up
RIT1	644.069	1422.34	2.20837	1.11333	1.5627e-09	3.54598e-08	up
GMPR	259.62	1005.5	3.87296	1.8133	1.64796e-09	3.71844e-08	up
THRB	38.4511	161.634	4.20363	1.90257	1.77824e-09	3.99836e-08	up
ZBTB21	212.557	837.949	3.94224	1.83178	2.10454e-09	4.68615e-08	up
RGPD8	56.153	154.023	2.74291	1.3913	2.11975e-09	4.71347e-08	up
FABP4	0.317288	8.38699	26.4333	3.18789	2.12217e-09	4.7156e-08	up
CDK1	22.6766	87.9334	3.87772	1.81964	2.12548e-09	4.71969e-08	up
KLHL24	659.409	1463.46	2.21936	1.11927	2.13009e-09	4.7234e-08	up
NMNAT3	38.792	89.962	2.31909	1.1776	2.12986e-09	4.7234e-08	up
HIST1H3J	3.39843	22.9088	6.74099	2.37348	2.14035e-09	4.74287e-08	up
CALD1	43.2312	237.214	5.4871	2.1847	2.14876e-09	4.75232e-08	up
HOMER2	89.1557	325.002	3.64533	1.73895	2.16778e-09	4.78057e-08	up
CA1	5.99344	46.6735	7.78743	2.50897	2.16451e-09	4.78057e-08	up
MACC1	9.59532	24.4328	2.54633	1.3174	2.21993e-09	4.88551e-08	up
ADAMTS2	11.0228	362.91	32.9235	3.30742	2.26805e-09	4.97439e-08	up
RTCA-AS1	12.308	52.3515	4.25345	1.90435	2.26991e-09	4.97507e-08	up
TRHDE	1.54059	14.6679	9.52091	2.65254	2.4095e-09	5.24523e-08	up
DAB2	278.645	759.13	2.72436	1.38523	2.4932e-09	5.41278e-08	up
CLK1	3284.47	7099.01	2.16138	1.08389	2.71999e-09	5.8655e-08	up
F2RL3	37.1526	129.635	3.48925	1.68599	2.93769e-09	6.28699e-08	up
CETP	44.6111	151.891	3.40479	1.65482	3.04546e-09	6.50623e-08	up
HIST1H4E	7.60692	31.0464	4.08133	1.88348	3.10571e-09	6.62173e-08	up
NAP1L1	6017.11	12503.4	2.07798	1.03082	3.13259e-09	6.67462e-08	up
FEM1C	418.734	1108.75	2.64785	1.34854	3.16796e-09	6.74104e-08	up
CENPE	24.6156	70.3092	2.85628	1.449	3.19163e-09	6.78451e-08	up
RHAG	0.257649	4.788	18.5835	2.96809	3.19261e-09	6.78451e-08	up
GRASP	315.056	1404.02	4.45642	1.96409	3.38565e-09	7.15687e-08	up
MT-CYB	56939.1	193880	3.40504	1.6583	3.39089e-09	7.16322e-08	up
AVPI1	29.463	82.7414	2.80832	1.42504	3.40986e-09	7.19856e-08	up
P2RY1	48.693	131.288	2.69624	1.36815	3.41449e-09	7.2036e-08	up
NENF	294.731	817.103	2.77237	1.40637	3.41953e-09	7.20951e-08	up
TMOD1	12.9739	41.1774	3.17385	1.566	3.45557e-09	7.27118e-08	up
DUSP10	146.97	581.354	3.9556	1.83146	3.52642e-09	7.40571e-08	up
GAS2L1	904.596	2687.9	2.97139	1.49296	3.5587e-09	7.46376e-08	up
C1QA	131.402	621.431	4.72925	2.02774	3.59136e-09	7.51263e-08	up
IFNG	46.2994	290.357	6.27128	2.30915	3.58873e-09	7.51263e-08	up
MAP3K7CL	2603.21	13917.1	5.34612	2.15367	3.6313e-09	7.58629e-08	up
TTK	8.79738	34.11	3.87729	1.82255	3.77673e-09	7.84421e-08	up
PNPLA8	386.241	817.079	2.11547	1.05406	3.84099e-09	7.95712e-08	up
SPDYA	15.239	38.9933	2.55878	1.2946	3.95206e-09	8.16614e-08	up
SMURF1	477.126	1002.53	2.10118	1.04531	4.07521e-09	8.39901e-08	up
HBP1	581.223	1380.91	2.37586	1.20784	4.23819e-09	8.7293e-08	up
MT-TW	30.093	139.721	4.64296	2.00544	4.43532e-09	9.07715e-08	up
LAMTOR1	1819.84	4110.3	2.2586	1.14124	4.47294e-09	9.14249e-08	up
SNORD11	2.89687	15.7962	5.45287	2.16719	4.49591e-09	9.17778e-08	up
RNF103	365.475	816.209	2.23328	1.12637	4.59351e-09	9.35324e-08	up
NET1	108.431	245.565	2.2647	1.1471	4.69491e-09	9.53553e-08	up
MT-TY	161.273	631.254	3.91419	1.81642	4.89889e-09	9.91223e-08	up
CD9	312.081	851.812	2.72945	1.38464	4.94219e-09	9.99356e-08	up
CCDC173	1.45413	12.851	8.83761	2.59618	5.06631e-09	1.02124e-07	up
ACCSL	0.694651	9.15907	13.1851	2.82459	5.06407e-09	1.02124e-07	up
TNFAIP3	3469.41	9623.81	2.7739	1.40596	5.08488e-09	1.02306e-07	up
H2AFJ	599.804	1332.76	2.22199	1.11984	5.09817e-09	1.02445e-07	up
TRBV7-5	4.79261	28.4334	5.93275	2.23332	5.10509e-09	1.0252e-07	up
CD226	914.638	1972.54	2.15664	1.07942	5.13955e-09	1.03147e-07	up
C9orf3	63.3961	140.808	2.22109	1.11293	5.5243e-09	1.10249e-07	up
BRCA2	47.1774	121.341	2.57202	1.31491	5.56246e-09	1.10804e-07	up
MPP1	1400.55	2962.78	2.11543	1.05387	5.70162e-09	1.13256e-07	up
LYPLAL1-DT	12.0579	56.6597	4.69897	2.00746	5.70808e-09	1.13284e-07	up
NOCT	31.0381	130.435	4.20242	1.89395	5.8232e-09	1.15284e-07	up
RAB20	176.857	683.522	3.86482	1.80178	5.85952e-09	1.15931e-07	up
SLC6A4	21.6164	72.9442	3.37448	1.63674	5.93766e-09	1.17333e-07	up
MPIG6B	1057.68	4209.78	3.98021	1.83445	5.9552e-09	1.17607e-07	up
C1QB	49.5591	302.049	6.09471	2.2744	6.08615e-09	1.20046e-07	up
ZBTB5	207.792	548.045	2.63746	1.34074	6.56615e-09	1.2841e-07	up
KIF18A	13.0911	34.727	2.65272	1.34375	7.28277e-09	1.41135e-07	up
SBDS	720.032	1533.51	2.12978	1.0628	7.3206e-09	1.41702e-07	up
MIR3648-1	1.51017	11.6819	7.7355	2.48521	7.59573e-09	1.4667e-07	up
CRAT	453.363	979.239	2.15995	1.08025	7.81753e-09	1.50771e-07	up
DDX24	1693.76	3567.75	2.10641	1.0478	7.95465e-09	1.53048e-07	up
TUBB1	2113.9	9352.64	4.42435	1.94757	8.04604e-09	1.54622e-07	up
G2E3	265.497	565.434	2.12972	1.06183	8.20144e-09	1.5742e-07	up
SAMD8	582.169	1271.27	2.18368	1.09534	8.25616e-09	1.58375e-07	up
CERNA1	18.4328	68.6086	3.72208	1.75034	8.48962e-09	1.62563e-07	up
YWHAH	1054.98	2255.98	2.1384	1.06753	8.64409e-09	1.65127e-07	up
CXCL5	333.147	1614.88	4.84736	2.04248	8.75843e-09	1.67013e-07	up
LHFPL6	4.22652	22.87	5.41108	2.13165	8.78765e-09	1.67411e-07	up
MT-TQ	70.4418	428.145	6.07799	2.26506	8.79148e-09	1.67411e-07	up
EFHC2	60.8181	160.722	2.64267	1.33804	8.94694e-09	1.70204e-07	up
MT-TM	154.25	786.797	5.10078	2.09403	9.10077e-09	1.72517e-07	up
ZNF331	328.575	985.027	2.99788	1.49962	9.16765e-09	1.7358e-07	up
COL1A1	2.20569	14.499	6.57346	2.33106	9.447e-09	1.78554e-07	up
NDUFAF3	555.179	1342.9	2.41886	1.22911	9.4945e-09	1.79346e-07	up
MTPN	3228.05	6565.96	2.03403	1.00042	9.73781e-09	1.83511e-07	up
ATP2B1	1213.59	2607.99	2.14899	1.07408	9.73513e-09	1.83511e-07	up
NFKBIE	645.86	1484.51	2.2985	1.16307	9.97031e-09	1.87562e-07	up
CADM2	4.98362	39.4918	7.92432	2.48663	9.99083e-09	1.87838e-07	up
SNAI1	18.4709	121.885	6.59876	2.33696	1.00594e-08	1.88719e-07	up
GNB5	422.734	884.984	2.09348	1.03781	1.04303e-08	1.95164e-07	up
MATN1	11.4163	42.4798	3.72099	1.75077	1.04351e-08	1.95164e-07	up
CDC14B	231.342	856.221	3.7011	1.74702	1.06167e-08	1.98329e-07	up
FAM69B	99.6889	282.785	2.83667	1.42988	1.06773e-08	1.99229e-07	up
IGKV1D-8	4.08192	28.5457	6.99321	2.38636	1.06866e-08	1.99286e-07	up
REEP1	5.7462	33.2065	5.77887	2.21265	1.07203e-08	1.99683e-07	up
ZMYND12	6.32328	28.5567	4.51612	1.9536	1.07327e-08	1.99799e-07	up
MT1G	0.787852	2151.95	2731.42	3.30488	1.10682e-08	2.0533e-07	up
RAPGEF5	6.74599	33.3126	4.93814	2.0471	1.12161e-08	2.07715e-07	up
HIST1H1T	2.05808	14.5683	7.07858	2.39614	1.1273e-08	2.08528e-07	up
PDGFC	68.6103	157.641	2.29764	1.15702	1.16593e-08	2.15302e-07	up
CCNT1	556.744	1269.96	2.28105	1.15233	1.19059e-08	2.19603e-07	up
SAMD14	73.4115	371.324	5.05811	2.08136	1.20037e-08	2.21154e-07	up
RGCC	376.648	986.295	2.61861	1.33022	1.35926e-08	2.48009e-07	up
HPGD	115.566	280.387	2.4262	1.22872	1.43416e-08	2.60492e-07	up
MEST	47.2548	141.784	3.0004	1.49337	1.44821e-08	2.62598e-07	up
GMFB	480.52	1006.78	2.09518	1.03949	1.47184e-08	2.66733e-07	up
RPL23AP42	33.9219	80.3078	2.36743	1.19522	1.47298e-08	2.66789e-07	up
NR1D2	539.398	1310.62	2.42979	1.23389	1.47576e-08	2.66991e-07	up
CRYM	11.3623	55.4012	4.87587	2.04092	1.48958e-08	2.69036e-07	up
INKA2-AS1	6.53408	31.4127	4.80752	2.02517	1.51661e-08	2.73469e-07	up
MFAP3L	195.169	725.647	3.71805	1.74931	1.56059e-08	2.80915e-07	up
DACT3	4.35117	46.7825	10.7517	2.69947	1.60702e-08	2.88143e-07	up
LSMEM1	65.802	231.728	3.5216	1.68771	1.61636e-08	2.89333e-07	up
APP	1947.17	4138.92	2.12561	1.05828	1.73215e-08	3.08341e-07	up
INKA1	59.9616	172.424	2.87557	1.44636	1.9223e-08	3.38071e-07	up
SCFD2	160.751	398.8	2.48086	1.25769	1.94163e-08	3.41097e-07	up
PXT1	8.63263	41.206	4.77328	2.01329	1.98393e-08	3.47009e-07	up
BEST3	1.3363	12.1034	9.05742	2.55308	1.98573e-08	3.47136e-07	up
MT-ND3	30903	101838	3.29539	1.6087	2.0684e-08	3.60998e-07	up
GFI1B	485.189	1722.75	3.55068	1.69501	2.10844e-08	3.66791e-07	up
CDKN1A	1545	3592.31	2.32511	1.17612	2.11791e-08	3.68039e-07	up
WHAMM	760.517	1671.82	2.19827	1.10257	2.12438e-08	3.68965e-07	up
SLFN14	19.2979	52.2892	2.70958	1.36462	2.15188e-08	3.73135e-07	up
SYNM	92.1389	271.004	2.94125	1.47049	2.28358e-08	3.93214e-07	up
FAM198A	16.211	75.6923	4.66918	1.98906	2.30292e-08	3.9612e-07	up
AP1M2	37.0768	155.551	4.19538	1.87897	2.37108e-08	4.05672e-07	up
C1orf198	137.122	424.854	3.09836	1.53324	2.43414e-08	4.15188e-07	up
MT-TL2	80.696	445.084	5.51556	2.15579	2.44206e-08	4.16265e-07	up
TMSB4X	61973.7	137538	2.2193	1.11485	2.55906e-08	4.34134e-07	up
GMNN	67.5415	141.547	2.0957	1.04759	2.56492e-08	4.34899e-07	up
VN1R110P	1.52886	12.1779	7.96538	2.45072	2.57254e-08	4.35961e-07	up
IGFBP2	28.012	245.431	8.76163	2.54592	2.61909e-08	4.43382e-07	up
MT-ND4	104178	346363	3.32472	1.61719	2.75682e-08	4.65963e-07	up
CENPN	33.2262	71.5	2.15191	1.07431	2.77279e-08	4.68415e-07	up
LGALS12	180.27	529.897	2.93946	1.46966	2.79175e-08	4.71371e-07	up
KIFC3	341.183	892.003	2.61444	1.32444	2.87424e-08	4.84789e-07	up
XIRP2	3.19944	18.6151	5.81822	2.20335	2.96627e-08	4.99002e-07	up
TRPC6	6.17378	26.203	4.24424	1.87811	2.9702e-08	4.99401e-07	up
RNU6-415P	63.7986	141.06	2.21102	1.10861	3.13159e-08	5.23796e-07	up
RAB30	267.324	644.02	2.40914	1.22037	3.17961e-08	5.30171e-07	up
HIST1H1B	1.45581	8.739	6.00286	2.24682	3.2251e-08	5.36921e-07	up
SKIL	372.783	856.148	2.29664	1.1589	3.33175e-08	5.53242e-07	up
RNASE1	19.7277	134.769	6.83144	2.34403	3.39563e-08	5.62688e-07	up
NPM1P26	6.02538	30.8557	5.12095	2.0766	3.40527e-08	5.63702e-07	up
ANKRD37	83.5969	176.735	2.11413	1.05224	3.64047e-08	5.99549e-07	up
GPRIN3	1017.73	2432	2.38963	1.2099	3.75587e-08	6.15713e-07	up
MT-TH	170.349	806.782	4.73606	1.99971	3.77865e-08	6.19132e-07	up
CCSER1	10.8435	46.0239	4.24437	1.88445	3.80794e-08	6.22978e-07	up
PIK3CA	405.293	862.073	2.12704	1.05705	3.82962e-08	6.25509e-07	up
HIST1H3B	6.00894	38.2247	6.36131	2.28143	3.83456e-08	6.25509e-07	up
ARL5B	409.087	1394.52	3.40884	1.64359	3.90271e-08	6.34927e-07	up
JMJD1C	1235.16	2979.41	2.41216	1.22177	4.05229e-08	6.56933e-07	up
SUCNR1	8.28718	39.75	4.79657	2.00173	4.05984e-08	6.57826e-07	up
IGFL2	0.667617	7.65275	11.4628	2.71072	4.06358e-08	6.58099e-07	up
PAQR3	116.045	242.113	2.08638	1.03074	4.10154e-08	6.63578e-07	up
COL10A1	5.62006	25.409	4.52112	1.93111	4.17689e-08	6.74411e-07	up
LRP12	32.2604	73.804	2.28776	1.14287	4.22597e-08	6.80626e-07	up
PEAR1	250.972	916.551	3.65201	1.72067	4.40658e-08	7.0713e-07	up
CDKN3	15.042	47.5874	3.16363	1.57085	4.49281e-08	7.19633e-07	up
VIL1	73.7644	311.178	4.21854	1.87653	4.53182e-08	7.25159e-07	up
CYP2F2P	8.89634	24.6646	2.77244	1.37112	4.54179e-08	7.26393e-07	up
HBB	3224.68	33418.1	10.3632	2.64014	4.93714e-08	7.84934e-07	up
ZNF644	309.99	634.888	2.04809	1.00694	4.97197e-08	7.8969e-07	up
ZNF271P	335.902	700.945	2.08675	1.03067	4.9998e-08	7.92868e-07	up
FAM91A1	969.134	2033.13	2.09789	1.03913	5.00073e-08	7.92868e-07	up
PTP4A2P2	42.2785	163.116	3.85813	1.77853	5.39199e-08	8.49682e-07	up
PARPBP	15.2805	34.7969	2.2772	1.16124	5.50884e-08	8.65972e-07	up
CHEK1	59.7844	121.212	2.02748	1.00289	5.52759e-08	8.68164e-07	up
FTH1P2	52.8027	126.119	2.38849	1.20943	5.78688e-08	9.04809e-07	up
RPL10P12	3.59222	18.4678	5.14105	2.06919	5.91177e-08	9.2254e-07	up
GNAZ	319.783	916.43	2.86578	1.43516	5.92274e-08	9.23804e-07	up
SLED1	34.8526	149.945	4.30226	1.89672	6.02302e-08	9.3757e-07	up
ATL1	29.64	76.6797	2.58703	1.29879	6.07745e-08	9.44725e-07	up
TEX14	5.62649	15.2687	2.71373	1.38909	6.1312e-08	9.52618e-07	up
HESX1	6.18462	30.0748	4.86284	2.02526	6.26486e-08	9.71156e-07	up
CD109	28.0756	96.1698	3.42539	1.64061	6.31159e-08	9.76868e-07	up
RGS13	4.54143	17.9472	3.95187	1.81787	6.48184e-08	9.99846e-07	up
WASF3	15.2868	76.2258	4.98637	2.03749	6.55909e-08	1.01031e-06	up
ATP9A	134.858	364.958	2.70625	1.36347	6.65865e-08	1.0227e-06	up
MTATP6P1	3029.53	11583.7	3.82361	1.76781	6.78887e-08	1.03972e-06	up
BAMBI	11.4777	49.0149	4.27044	1.89183	6.84645e-08	1.04754e-06	up
NCAPG	23.2772	75.014	3.22264	1.5835	6.87003e-08	1.05065e-06	up
TNFRSF12A	47.7098	166.467	3.48915	1.66875	7.12787e-08	1.08646e-06	up
MT-TI	93.4291	458.477	4.90722	2.02576	7.16456e-08	1.09102e-06	up
DNM1	73.1085	180.704	2.47173	1.24878	7.71245e-08	1.16781e-06	up
ALOX12	324.737	759.265	2.33809	1.17887	7.74053e-08	1.17096e-06	up
ASPM	26.9764	79.7335	2.95568	1.47865	7.76568e-08	1.17421e-06	up
MITF	60.6639	132.128	2.17803	1.08421	7.79253e-08	1.17661e-06	up
ZNF484	62.5129	161.415	2.58211	1.30359	8.73612e-08	1.30863e-06	up
MT-TS1	16.4239	73.0121	4.44548	1.92328	8.78813e-08	1.31539e-06	up
MYCBP2-AS1	2.29415	12.1875	5.31243	2.09681	8.78948e-08	1.31539e-06	up
TGFB2	1.98731	11.5099	5.79173	2.15354	9.08225e-08	1.35165e-06	up
RNY3P8	1.37512	8.05856	5.86025	2.16719	9.35832e-08	1.38824e-06	up
CLEC2L	30.5209	128.486	4.20977	1.86494	9.5782e-08	1.41693e-06	up
PRKAR1B	440.456	1151.09	2.61339	1.31966	9.65278e-08	1.42731e-06	up
PRDX3P1	13.9795	60.5107	4.32854	1.8941	9.67746e-08	1.42904e-06	up
CALHM5	7.76715	31.4013	4.04283	1.81886	9.97184e-08	1.47042e-06	up
HBQ1	24.8464	108.618	4.37157	1.90409	1.07841e-07	1.57573e-06	up
CHORDC1	435.947	898.892	2.06193	1.0148	1.08524e-07	1.58495e-06	up
EAF1	554.542	1161.68	2.09484	1.03585	1.1007e-07	1.60393e-06	up
MT1F	126.594	384.667	3.03859	1.50268	1.17682e-07	1.70711e-06	up
PLS3	6.02553	22.1941	3.68335	1.70865	1.23894e-07	1.79317e-06	up
CLK3P2	1.70793	11.0466	6.46781	2.24818	1.26167e-07	1.81951e-06	up
MIR4742	0.58075	6.82243	11.7476	2.63376	1.27927e-07	1.84242e-06	up
RASGRP3	188.19	392.36	2.08492	1.03064	1.30058e-07	1.86975e-06	up
LANCL3	32.9748	95.3493	2.89158	1.43778	1.32239e-07	1.89517e-06	up
SCGB1C2	8.22792	42.8998	5.21393	2.07131	1.34675e-07	1.92664e-06	up
PSPHP1	31.7741	82.0286	2.58162	1.3101	1.37093e-07	1.95427e-06	up
IGKV1-33	20.7375	142.068	6.85076	2.30987	1.43362e-07	2.03822e-06	up
SMG1P1	258.219	549.758	2.12903	1.05574	1.43904e-07	2.04411e-06	up
IFITM10	13.9785	91.7613	6.56444	2.27239	1.4467e-07	2.05408e-06	up
NRGN	14518.3	48770.3	3.35923	1.61647	1.45839e-07	2.06612e-06	up
RPS15AP30	5.18767	15.7386	3.03385	1.51641	1.49727e-07	2.11375e-06	up
SGTB	306.202	660.736	2.15784	1.07358	1.50841e-07	2.12759e-06	up
RSPH4A	15.273	31.4516	2.05929	1.01642	1.52411e-07	2.14692e-06	up
APLP1	1.80191	7.91434	4.39219	1.87931	1.53961e-07	2.1678e-06	up
DUSP8	172.197	796.775	4.6271	1.9555	1.59093e-07	2.23418e-06	up
CFAP20	238.989	496.065	2.07568	1.02289	1.59379e-07	2.23723e-06	up
CYP19A1	0.330676	4.94215	14.9456	2.73672	1.6953e-07	2.3673e-06	up
ODF3	4.13355	30.2864	7.32698	2.35489	1.6964e-07	2.36781e-06	up
TRIM40	4.34812	20.1186	4.62697	1.94359	1.69786e-07	2.36882e-06	up
E2F1	176.91	635.712	3.59342	1.69067	1.72342e-07	2.40344e-06	up
ULBP2	2.27702	14.3215	6.28959	2.22142	1.74025e-07	2.42375e-06	up
HSPA1B	96.3792	692.13	7.18133	2.33945	1.77226e-07	2.46193e-06	up
TMCC2	126.94	287.907	2.26805	1.13697	1.81141e-07	2.51305e-06	up
PBX1	78.501	250.414	3.18995	1.5532	1.86862e-07	2.58573e-06	up
NUTF2	679.724	1437.19	2.11437	1.0464	1.91873e-07	2.64822e-06	up
PVALB	37.7954	209.791	5.5507	2.12128	1.92114e-07	2.64928e-06	up
OR56B2P	1.43585	7.13838	4.97155	2.02598	1.94468e-07	2.67714e-06	up
BBOF1	23.1309	63.8123	2.75875	1.37256	1.95406e-07	2.68891e-06	up
RPL32P1	66.9223	184.522	2.75726	1.38044	1.96269e-07	2.69767e-06	up
ELL2	282.276	604.107	2.14013	1.06374	1.978e-07	2.71603e-06	up
PTGFR	1.42358	13.0908	9.19567	2.50723	2.00616e-07	2.75e-06	up
MEF2C-AS1	30.4648	75.2593	2.47037	1.23786	2.10099e-07	2.86653e-06	up
UACA	50.9515	120.561	2.3662	1.18785	2.11676e-07	2.8856e-06	up
OR7E94P	32.4523	123.167	3.79532	1.74459	2.12531e-07	2.89566e-06	up
PLXNB3	22.674	86.9678	3.83557	1.75414	2.12594e-07	2.89566e-06	up
EHD3	392.609	1018.32	2.59373	1.30651	2.13086e-07	2.90113e-06	up
DENND5B	107.316	259.562	2.41868	1.2218	2.16985e-07	2.94797e-06	up
SMAD6	12.4666	60.0685	4.81837	1.98725	2.1872e-07	2.96778e-06	up
MT-ATP6	71261.1	212816	2.98643	1.4772	2.21413e-07	3.00178e-06	up
LURAP1L	3.70875	17.2955	4.66345	1.9491	2.25777e-07	3.05806e-06	up
CCNL2P1	1.05315	7.19129	6.82836	2.2689	2.27002e-07	3.07108e-06	up
E2F6P4	1.36702	11.1231	8.13672	2.39161	2.2887e-07	3.08854e-06	up
H3F3AP6	104.674	223.111	2.13149	1.05602	2.32244e-07	3.13144e-06	up
PKIG	203.625	430.498	2.11417	1.04526	2.35706e-07	3.17147e-06	up
FDX1P1	1.23795	6.08021	4.91154	1.97474	2.52368e-07	3.37727e-06	up
COBLL1	132.097	304.834	2.30765	1.159	2.53065e-07	3.38519e-06	up
AFF4	991.015	2065.38	2.0841	1.02706	2.57729e-07	3.44328e-06	up
MIR644A	0.820166	5.59939	6.82714	2.24871	2.6276e-07	3.50517e-06	up
CTSA	3373.07	7152.96	2.12061	1.0498	2.68783e-07	3.57905e-06	up
OR2W3	21.3636	70.7311	3.31082	1.58911	2.72145e-07	3.61783e-06	up
USP3-AS1	69.0874	171.179	2.47772	1.24701	2.82179e-07	3.73269e-06	up
PTPRF	24.1336	72.9932	3.02454	1.48231	2.8943e-07	3.82389e-06	up
TNFSF4	124.869	369.545	2.95946	1.46352	2.94266e-07	3.8782e-06	up
ACKR4	4.56037	15.9245	3.49193	1.64366	2.98203e-07	3.91884e-06	up
RRM2P3	14.0976	37.3971	2.65274	1.3079	3.00057e-07	3.94159e-06	up
CD80	8.75403	33.2672	3.80022	1.73951	3.02089e-07	3.96667e-06	up
ORC1	24.5685	60.5207	2.46335	1.25273	3.07023e-07	4.02816e-06	up
[truncated: 419 more rows]

## Sheet: Share DEGs
	RA_log2 (Fold change)	RA_FDR	SLE_log2 (Fold change)	SLE_FDR	PSS_log2 (Fold change)	PSS_FDR	poly_log2 (Fold change)	poly_FDR	Type
[truncated: 611 more rows]
